# Supplementary material for: Relationship between Phylogenetic Distribution and Genomic Features in Neurospora crassa
Source: PLoS One. 2009 Apr 21;4(4):e5286. doi: 10.1371/journal.pone.0005286 (PMC2684829; doi:10.1371/journal.pone.0005286)
Supplement: Table S1 — Neurospora crassa genome information. N. crassa gene IDs, aliases, hyperlinks to MIPS database, MIPS descriptions, FunCat categories, Pfam domains, SignalP results, and LS classification for each of the % id threshold values are shown. Paralogous genes for N. crassa-orphans and tandemly located N. crassa-orphans paralogs are also indicated. Codes for LS groups are: N_Evol, F_Evol, A_Evol, B_Evol, E_Evol, and O_Evol for N. crassa-orphans, Pezizo-specific, Ascomycota-core, Dikarya-core, Euk/Prok-core and Others, respectively. SIMAP matrices for 25%, 30% and 35% threshold values are also listed in the attached worksheets. In the matrices, presence or absence of homologous sequences of N. crassa genes in non-fungal Eukaryotes and/or Prokaryotes (Euk/Prok), Basidiomycota, Saccharomycotina and/or Taphrinomycotina (Asco), Pezizomycotina and C. globosum (CHG) are number coded as 1/0, 2/0, 4/0, 8/0 and 0.5/0, respectively, and the total scores were used to define the LS groups. Length-adjusted protein percent identity values of N. crassa genes against Chaetomium globosum (NC_CHG), Saccharomyces cerevisiae (NC_SC), Phanerochaete chrysosporium (NC_PhC), Drosophila melanogaster (NC_DM) and Arabidopsis thaliana (NC_AT) were used to revise the SIMAP derived LS classification. (9.36 MB XLS) [file pone.0005286.s001.xls]

## Sheet: Table S1
MIPS ID	Broad7	MIPS_09	Click to Web	MIPS description	FunCat	Pfam	SignalP	0.25	0.3	0.35	Paralogs of Nc orphans	Tandom orph
mito_010	NULL	mito_010	mito_010	NADH dehydrogenase (ubiquinone) chain 5	02 ENERGY_02.11 electron transport and membrane-associated energy conservation_02.13 respiration_70 SUBCELLULAR LOCALIZATION_70.16 mitochondrion	NULL	n/a	O_Evol	E_Evol	E_Evol		0
mito_020	NULL	mito_020	mito_020	predicted ND5 intron 2 protein	11 TRANSCRIPTION_11.02 RNA synthesis_11.02.03 mRNA synthesis_11.04 RNA processing_11.04.03 mRNA processing (splicing, 5'-, 3'-end processing)_11.04.03.01 splicing_38 TRANSPOSABLE ELEMENTS, VIRAL AND PLASMID PROTEINS_38.07 proteins necessary for transposon movement_70 SUBCELLULAR LOCALIZATION_70.16 mitochondrion	NULL	n/a	F_Evol	F_Evol	F_Evol		0
mito_030	NULL	mito_030	mito_030	predicted ND5 intron 1 protein	11 TRANSCRIPTION_11.02 RNA synthesis_11.02.03 mRNA synthesis_11.04 RNA processing_11.04.03 mRNA processing (splicing, 5'-, 3'-end processing)_11.04.03.01 splicing_38 TRANSPOSABLE ELEMENTS, VIRAL AND PLASMID PROTEINS_38.07 proteins necessary for transposon movement_70 SUBCELLULAR LOCALIZATION_70.16 mitochondrion	NULL	n/a	B_Evol	F_Evol	F_Evol		0
mito_050	NULL	mito_050	mito_050	predicted ND4L intron protein	11 TRANSCRIPTION_11.02 RNA synthesis_11.02.03 mRNA synthesis_11.04 RNA processing_11.04.03 mRNA processing (splicing, 5'-, 3'-end processing)_11.04.03.01 splicing_38 TRANSPOSABLE ELEMENTS, VIRAL AND PLASMID PROTEINS_38.07 proteins necessary for transposon movement_70 SUBCELLULAR LOCALIZATION_70.16 mitochondrion	NULL	n/a	F_Evol	F_Evol	F_Evol		0
mito_060	NULL	mito_060	mito_060	probable NADH dehydrogenase (ubiquinone) chain 3	02 ENERGY_02.11 electron transport and membrane-associated energy conservation_02.13 respiration_70 SUBCELLULAR LOCALIZATION_70.16 mitochondrion	NULL	n/a	E_Evol	B_Evol	F_Evol		0
mito_070	NULL	mito_070	mito_070	predicted ND3 intron protein	99 UNCLASSIFIED PROTEINS	NULL	n/a	N_Evol	N_Evol	N_Evol	mito_030	0
mito_080	NULL	mito_080	mito_080	NADH dehydrogenase (ubiquinone) chain 2	02 ENERGY_02.11 electron transport and membrane-associated energy conservation_02.13 respiration_70 SUBCELLULAR LOCALIZATION_70.16 mitochondrion	NULL	n/a	E_Evol	B_Evol	B_Evol		0
mito_090	NULL	mito_090	mito_090	predicted 23S rRNA intron protein	12 PROTEIN SYNTHESIS_12.01 ribosome biogenesis_12.01.01 ribosomal proteins_70 SUBCELLULAR LOCALIZATION_70.16 mitochondrion	NULL	n/a	F_Evol	F_Evol	F_Evol		0
mito_100	NULL	mito_100	mito_100	probable NADH dehydrogenase (ubiquinone) chain 6	02 ENERGY_02.11 electron transport and membrane-associated energy conservation_02.13 respiration_70 SUBCELLULAR LOCALIZATION_70.16 mitochondrion	NULL	n/a	E_Evol	F_Evol	F_Evol		0
mito_110	NULL	mito_110	mito_110	cytochrome-c oxidase chain III	02 ENERGY_02.11 electron transport and membrane-associated energy conservation_02.13 respiration_70 SUBCELLULAR LOCALIZATION_70.16 mitochondrion	NULL	n/a	E_Evol	E_Evol	E_Evol		0
mito_120	NULL	mito_120	mito_120	NADH dehydrogenase chain 2 (duplicated fragment)	99 UNCLASSIFIED PROTEINS	NULL	n/a	F_Evol	N_Evol	N_Evol	mito_080	0
mito_130	NULL	mito_130	mito_130	cytochrome-c oxidase chain II	02 ENERGY_02.11 electron transport and membrane-associated energy conservation_02.13 respiration_70 SUBCELLULAR LOCALIZATION_70.16 mitochondrion	NULL	n/a	E_Evol	E_Evol	E_Evol		0
mito_140	NULL	mito_140	mito_140	H+-transporting ATP synthase protein 9	02 ENERGY_02.11 electron transport and membrane-associated energy conservation_02.13 respiration_70 SUBCELLULAR LOCALIZATION_70.16 mitochondrion	NULL	n/a	E_Evol	E_Evol	E_Evol		0
mito_150	NULL	mito_150	mito_150	H+-transporting ATP synthase protein 6	02 ENERGY_02.11 electron transport and membrane-associated energy conservation_02.13 respiration_70 SUBCELLULAR LOCALIZATION_70.16 mitochondrion	NULL	n/a	E_Evol	E_Evol	E_Evol		0
mito_155	NULL	mito_155	mito_155	predicted ATP6 intron maturase	11 TRANSCRIPTION_11.02 RNA synthesis_11.02.03 mRNA synthesis_11.04 RNA processing_11.04.03 mRNA processing (splicing, 5'-, 3'-end processing)_11.04.03.01 splicing_38 TRANSPOSABLE ELEMENTS, VIRAL AND PLASMID PROTEINS_38.07 proteins necessary for transposon movement_70 SUBCELLULAR LOCALIZATION_70.16 mitochondrion	NULL	n/a	B_Evol	B_Evol	F_Evol		0
mito_160	NULL	mito_160	mito_160	H+-transporting ATP synthase protein 8	02 ENERGY_02.11 electron transport and membrane-associated energy conservation_02.13 respiration_70 SUBCELLULAR LOCALIZATION_70.16 mitochondrion	NULL	n/a	B_Evol	B_Evol	B_Evol		0
mito_170	NULL	mito_170	mito_170	probable NADH dehydrogenase (ubiquinone) chain 4	02 ENERGY_02.11 electron transport and membrane-associated energy conservation_02.13 respiration_70 SUBCELLULAR LOCALIZATION_70.16 mitochondrion	NULL	n/a	E_Evol	E_Evol	E_Evol		0
mito_180	NULL	mito_180	mito_180	predicted ND4 intron protein	11 TRANSCRIPTION_11.02 RNA synthesis_11.02.03 mRNA synthesis_11.04 RNA processing_11.04.03 mRNA processing (splicing, 5'-, 3'-end processing)_11.04.03.01 splicing_38 TRANSPOSABLE ELEMENTS, VIRAL AND PLASMID PROTEINS_38.07 proteins necessary for transposon movement_70 SUBCELLULAR LOCALIZATION_70.16 mitochondrion	NULL	n/a	F_Evol	F_Evol	F_Evol		0
mito_190	NULL	mito_190	mito_190	NADH dehydrogenase (ubiquinone) chain 1	02 ENERGY_02.11 electron transport and membrane-associated energy conservation_02.13 respiration_70 SUBCELLULAR LOCALIZATION_70.16 mitochondrion	NULL	n/a	E_Evol	E_Evol	E_Evol		0
mito_195	NULL	mito_195	mito_195	predicted ND1 intron protein	38 TRANSPOSABLE ELEMENTS, VIRAL AND PLASMID PROTEINS_38.07 proteins necessary for transposon movement_70 SUBCELLULAR LOCALIZATION_70.16 mitochondrion	NULL	n/a	O_Evol	F_Evol	F_Evol		0
mito_200	NULL	mito_200	mito_200	hypothetical 70K protein	99 UNCLASSIFIED PROTEINS	NULL	n/a	N_Evol	N_Evol	N_Evol		0
mito_210	NULL	mito_210	mito_210	cytochrome-c oxidase chain I	02 ENERGY_02.11 electron transport and membrane-associated energy conservation_02.13 respiration_70 SUBCELLULAR LOCALIZATION_70.16 mitochondrion	NULL	n/a	E_Evol	E_Evol	E_Evol		0
mito_220	NULL	mito_220	mito_220	ubiquinol--cytochrome-c reductase cytochrome b	02 ENERGY_02.11 electron transport and membrane-associated energy conservation_02.13 respiration_70 SUBCELLULAR LOCALIZATION_70.16 mitochondrion	NULL	n/a	E_Evol	E_Evol	E_Evol		0
mito_230	NULL	mito_230	mito_230	related to cob intron2 maturase/endonuclease	11 TRANSCRIPTION_11.02 RNA synthesis_11.02.03 mRNA synthesis_11.04 RNA processing_11.04.03 mRNA processing (splicing, 5'-, 3'-end processing)_11.04.03.01 splicing_38 TRANSPOSABLE ELEMENTS, VIRAL AND PLASMID PROTEINS_38.07 proteins necessary for transposon movement_70 SUBCELLULAR LOCALIZATION_70.16 mitochondrion	NULL	n/a	E_Evol	E_Evol	F_Evol		0
mito_240	NULL	mito_240	mito_240	related to cob intron1 maturase	11 TRANSCRIPTION_11.02 RNA synthesis_11.02.03 mRNA synthesis_11.04 RNA processing_11.04.03 mRNA processing (splicing, 5'-, 3'-end processing)_11.04.03.01 splicing_38 TRANSPOSABLE ELEMENTS, VIRAL AND PLASMID PROTEINS_38.07 proteins necessary for transposon movement_70 SUBCELLULAR LOCALIZATION_70.16 mitochondrion	NULL	n/a	B_Evol	B_Evol	B_Evol		0
3nc400_030	NCU00005	NCU00005	NCU00005	conserved hypothetical protein	99 UNCLASSIFIED PROTEINS	;DUF1109;	Non-secretory protein	F_Evol	F_Evol	F_Evol		0
3nc400_050	NCU00007	NCU00007	NCU00007	related to pH signal transduction protein PalH	30 CELLULAR COMMUNICATION/SIGNAL TRANSDUCTION MECHANISM_30.05 transmembrane signal transduction_34 INTERACTION WITH THE ENVIRONMENT_34.11 cellular sensing and response to external stimulus_34.11.03 chemoperception and response_34.11.03.11 pH response_70 SUBCELLULAR LOCALIZATION_70.02 eukaryotic plasma membrane / membrane attached	;PalH;	Non-secretory protein	F_Evol	F_Evol	F_Evol		0
3nc400_060	NCU00008	NCU00008	NCU00008	probable longevity-assurance protein LAG1	01 METABOLISM_01.06 lipid, fatty acid and isoprenoid metabolism_20 CELLULAR TRANSPORT, TRANSPORT FACILITIES AND TRANSPORT ROUTES_20.09 transport routes_20.09.07 vesicular transport (Golgi network, etc.)_20.09.07.03 ER to Golgi transport_40 CELL FATE_40.20 cell aging_70 SUBCELLULAR LOCALIZATION_70.07 endoplasmic reticulum	;TRAM1;LAG1;	Non-secretory protein	B_Evol	B_Evol	B_Evol		0
3nc400_070	NCU00009	NCU00009	NCU00009	hypothetical protein	99 UNCLASSIFIED PROTEINS	NULL	Non-secretory protein	N_Evol	N_Evol	N_Evol		0
3nc400_090	NCU00011	NCU00011	NCU00011	questionable protein	99 UNCLASSIFIED PROTEINS	NULL	Non-secretory protein	N_Evol	N_Evol	N_Evol		0
3nc400_100	NCU00013	NCU00013	NCU00013	questionable protein	99 UNCLASSIFIED PROTEINS	NULL	Non-secretory protein	N_Evol	N_Evol	N_Evol		0
3nc400_110	NCU00014	NCU00014	NCU00014	putative protein	99 UNCLASSIFIED PROTEINS	NULL	Non-secretory protein	F_Evol	N_Evol	N_Evol		0
3nc400_120	NCU00015	NCU00015	NCU00015	putative protein	99 UNCLASSIFIED PROTEINS	;AhpC-TSA;	Non-secretory protein	F_Evol	F_Evol	F_Evol		0
3nc400_130	NCU00017	NCU00017	NCU00017	conserved hypothetical protein	99 UNCLASSIFIED PROTEINS	;Zn_clus;	Non-secretory protein	F_Evol	F_Evol	F_Evol		0
3nc400_150	NCU00019	NCU00019	NCU00019	related to forkhead protein	10 CELL CYCLE AND DNA PROCESSING_10.01 DNA processing_10.01.09 DNA restriction or modification_10.01.09.05 DNA conformation modification (e.g. chromatin)_10.03 cell cycle_10.03.01 mitotic cell cycle and cell cycle control_11 TRANSCRIPTION_11.02 RNA synthesis_11.02.03 mRNA synthesis_11.02.03.04 transcriptional control_70 SUBCELLULAR LOCALIZATION_70.10 nucleus	;FHA;Extensin_2;Fork_head;	Non-secretory protein	F_Evol	F_Evol	F_Evol		0
3nc400_170	NCU00022	NCU00022	NCU00022	hypothetical protein	99 UNCLASSIFIED PROTEINS	;AflR;	Non-secretory protein	F_Evol	F_Evol	N_Evol		0
3nc400_180	NCU00023	NCU00023	NCU00023	related to ferric-chelate reductase	16 PROTEIN WITH BINDING FUNCTION OR COFACTOR REQUIREMENT (structural or catalytic)_16.17 metal binding_16.17.09 heavy metal binding (Cu, Fe, Zn)_20 CELLULAR TRANSPORT, TRANSPORT FACILITIES AND TRANSPORT ROUTES_20.01 transported compounds (substrates)_20.01.01 ion transport_20.01.01.01 cation transport (H+, Na+, K+, Ca2+ , NH4+, etc.)_20.01.01.01.01 heavy metal ion transport (Cu+, Fe3+, etc.)_20.0…	;DUF1206;Ferric_reduct;FAD_binding_8;NAD_binding_6;NAD_binding_1;	Non-secretory protein	B_Evol	F_Evol	F_Evol		0
3nc400_190	NCU00024	NCU00024	NCU00024	conserved hypothetical protein	99 UNCLASSIFIED PROTEINS	;Yippee;	Non-secretory protein	E_Evol	F_Evol	F_Evol		0
3nc400_200	NCU00025	NCU00025	NCU00025	conserved hypothetical protein	99 UNCLASSIFIED PROTEINS	;C4dic_mal_tran;UAA;Nuc_sug_transp;NADHdh;TPT;DUF6;	Signal peptide	E_Evol	E_Evol	B_Evol		0
3nc400_210	NCU00026	NCU00026	NCU00026	hypothetical protein	99 UNCLASSIFIED PROTEINS	NULL	Non-secretory protein	F_Evol	F_Evol	F_Evol		0
3nc400_220	NCU00027	NCU00027	NCU00027	related to tRNA splicing endonuclease delta subunit	11 TRANSCRIPTION_11.04 RNA processing_11.04.02 tRNA processing	NULL	Non-secretory protein	F_Evol	F_Evol	F_Evol		0
3nc400_230	NCU00028	NCU00028	NCU00028	related to formaldehyde dehydrogenase	01 METABOLISM_01.05 C-compound and carbohydrate metabolism	;ADH_N;ADH_zinc_N;	Non-secretory protein	E_Evol	E_Evol	E_Evol		0
3nc400_240	NCU00029	NCU00029	NCU00029	related to vacuolar zinc efflux protein	20 CELLULAR TRANSPORT, TRANSPORT FACILITIES AND TRANSPORT ROUTES_20.01 transported compounds (substrates)_20.01.01 ion transport_20.01.01.01 cation transport (H+, Na+, K+, Ca2+ , NH4+, etc.)_20.09 transport routes_20.09.13 vacuolar/lysosomal transport_34 INTERACTION WITH THE ENVIRONMENT_34.01 homeostasis_34.01.01 homeostasis of cations_70 SUBCELLULAR LOCALIZATION_70.25 vacuole or lysosome	;Zip;	Non-secretory protein	F_Evol	F_Evol	F_Evol		0
3nc400_250	NCU00030	NCU00030	NCU00030	probable nuclease NUC1 precursor, mitochondrial	01 METABOLISM_01.03 nucleotide/nucleoside/nucleobase metabolism_01.03.16 polynucleotide degradation_70 SUBCELLULAR LOCALIZATION_70.16 mitochondrion	;Endonuclease_NS;	Signal peptide	E_Evol	E_Evol	E_Evol		0
3nc400_260	NCU00031	NCU00031	NCU00031	putative protein	99 UNCLASSIFIED PROTEINS	NULL	Non-secretory protein	N_Evol	N_Evol	N_Evol		0
3nc400_290	NCU00034	NCU00034	NCU00034	related to farnesyl cysteine carboxyl-methyltransferase	01 METABOLISM_01.06 lipid, fatty acid and isoprenoid metabolism_14 PROTEIN FATE (folding, modification, destination)_14.07 protein modification_14.07.01 modification with fatty acids (e.g. myristylation, palmitylation, farnesylation)	;DUF1295;ICMT;	Non-secretory protein	E_Evol	E_Evol	B_Evol		0
3nc400_300	NCU00035	NCU00035	NCU00035	related to diacylglycerol acyltransferase	01 METABOLISM_01.06 lipid, fatty acid and isoprenoid metabolism	;MBOAT;	Non-secretory protein	O_Evol	O_Evol	F_Evol		0
3nc400_310	NCU00037	NCU00037	NCU00037	related to polyadenylation factor I subunit 2	11 TRANSCRIPTION_11.04 RNA processing_11.04.03 mRNA processing (splicing, 5'-, 3'-end processing)_11.04.03.05 3'-end processing	;WD40;WD40;WD40;WD40;WD40;WD40;Extensin_2;WD40;	Non-secretory protein	E_Evol	E_Evol	E_Evol		0
3nc400_340	NCU00039	NCU00039	NCU00039	related to beta-1,3 exoglucanase	01 METABOLISM_01.05 C-compound and carbohydrate metabolism_01.05.03 polysaccharide metabolism_32 CELL RESCUE, DEFENSE AND VIRULENCE_32.10 degradation / modification of foreign (exogenous) compounds_32.10.07 degradation / modification of foreign (exogenous) polysaccharides	;Mucin;WSC;WSC;Toxin_7;	Signal peptide	F_Evol	F_Evol	F_Evol		0
3nc400_360	NCU00041	NCU00041	NCU00041	g protein gamma subunit Gng-1	30 CELLULAR COMMUNICATION/SIGNAL TRANSDUCTION MECHANISM_30.01 cellular signalling_30.01.05 enzyme mediated signal transduction_30.01.05.05 G-protein mediated signal transduction_30.01.05.05.03 trimeric G-protein mediated signal transduction_34 INTERACTION WITH THE ENVIRONMENT_34.11 cellular sensing and response to external stimulus_34.11.03 chemoperception and response_34.11.03.07 pheromone respo…	;G-gamma;	Non-secretory protein	E_Evol	B_Evol	B_Evol		0
3nc400_380	NCU00043	NCU00043	NCU00043	serine/threonine protein phosphatase PP1 PPP-1	10 CELL CYCLE AND DNA PROCESSING_10.01 DNA processing_10.01.09 DNA restriction or modification_10.01.09.05 DNA conformation modification (e.g. chromatin)_10.03 cell cycle_10.03.04 nuclear and chromosomal cycle_10.03.04.05 chromosome segregation/division_14 PROTEIN FATE (folding, modification, destination)_14.07 protein modification_14.07.03 modification by phosphorylation, dephosphorylation, auto…	;Metallophos;	Non-secretory protein	E_Evol	E_Evol	E_Evol		0
3nc400_390	NCU00045	NCU00045	NCU00045	related to bromodomain and PHD finger-containing protein	11 TRANSCRIPTION_11.02 RNA synthesis_11.02.03 mRNA synthesis_11.02.03.04 transcriptional control	;C1_3;PHD;zf-C3HC4;zf-RanBP;zf-RING-like;UPF0253;HRDC;	Non-secretory protein	F_Evol	F_Evol	F_Evol		0
3nc400_400	NCU00046	NCU00046	NCU00046	hypothetical protein	99 UNCLASSIFIED PROTEINS	;LRR_1;LRR_1;LRR_1;LRR_1;LRR_1;LRR_1;LRR_1;LRR_1;	Non-secretory protein	B_Evol	B_Evol	F_Evol		0
3nc400_420	NCU00051	NCU00051	NCU00051	hypothetical protein	99 UNCLASSIFIED PROTEINS	;PIR;	Non-secretory protein	F_Evol	F_Evol	F_Evol		0
3nc400_430	NCU00052	NCU00052	NCU00052	conserved hypothetical protein	99 UNCLASSIFIED PROTEINS	;CoA_transf_3;	Non-secretory protein	B_Evol	F_Evol	F_Evol		0
3nc405_010	NCU00054	NCU00054	NCU00054	hypothetical protein	99 UNCLASSIFIED PROTEINS	;Fungal_trans;	Non-secretory protein	F_Evol	F_Evol	F_Evol		0
3nc405_020	NCU00055	NCU00055	NCU00055	hypothetical protein	99 UNCLASSIFIED PROTEINS	;Dioxygenase_N;Dioxygenase_C;	Non-secretory protein	E_Evol	E_Evol	E_Evol		0
3nc407_020	NCU00056	NCU00056	NCU00056	hypothetical protein	99 UNCLASSIFIED PROTEINS	;Ail_Lom;ketoacyl-synt;Thiolase_C;Ketoacyl-synt_C;	Non-secretory protein	E_Evol	E_Evol	E_Evol		0
3nc407_030	NCU00057	NCU00057	NCU00057	hypothetical protein	99 UNCLASSIFIED PROTEINS	;Ubiq_cyt_C_chap;	Non-secretory protein	F_Evol	F_Evol	F_Evol		0
3nc407_060	NCU00059	NCU00059	NCU00059	hypothetical protein	99 UNCLASSIFIED PROTEINS	NULL	Non-secretory protein	F_Evol	F_Evol	F_Evol		0
3nc407_070	NCU00060	NCU00060	NCU00060	putative protein	99 UNCLASSIFIED PROTEINS	NULL	Non-secretory protein	F_Evol	F_Evol	F_Evol		0
3nc415_010	NCU00061	NCU00061	NCU00061	putative protein	99 UNCLASSIFIED PROTEINS	;Glyco_hydro_16;	Signal peptide	F_Evol	F_Evol	F_Evol		0
3nc415_040	NCU00064	NCU00064	NCU00064	hypothetical protein	99 UNCLASSIFIED PROTEINS	NULL	Non-secretory protein	F_Evol	F_Evol	F_Evol		0
3nc415_050	NCU00065	NCU00065	NCU00065	related to tRNA dihydrouridine synthase	11 TRANSCRIPTION_11.06 RNA modification_11.06.02 tRNA modification	;Dus;	Non-secretory protein	A_Evol	F_Evol	F_Evol		0
3nc415_070	NCU00067	NCU00067	NCU00067	probable dolichol phosphate-mannose biosynthesis regulatory protein	18 REGULATION OF METABOLISM AND PROTEIN FUNCTION_18.02 regulation of protein activity_18.02.01 enzymatic activity regulation / enzyme regulator	;DPM2;	Signal peptide	E_Evol	E_Evol	E_Evol		0
3nc415_090	NCU00069	NCU00069	NCU00069	hypothetical protein	99 UNCLASSIFIED PROTEINS	NULL	Non-secretory protein	N_Evol	N_Evol	N_Evol		0
3nc415_110	NCU00070	NCU00070	NCU00070	hypothetical protein	99 UNCLASSIFIED PROTEINS	;Extensin_2;HPC2;PHD;	Non-secretory protein	F_Evol	F_Evol	F_Evol		0
3nc415_130	NCU00072	NCU00072	NCU00072	hypothetical protein	99 UNCLASSIFIED PROTEINS	;TspO_MBR;	Non-secretory protein	F_Evol	F_Evol	F_Evol		0
3nc415_150	NCU00074	NCU00074	NCU00074	putative protein	99 UNCLASSIFIED PROTEINS	NULL	Non-secretory protein	F_Evol	F_Evol	F_Evol		0
3nc415_160	NCU00075	NCU00075	NCU00075	probable heat shock protein	14 PROTEIN FATE (folding, modification, destination)_14.01 protein folding and stabilization_32 CELL RESCUE, DEFENSE AND VIRULENCE_32.01 stress response_32.01.05 heat shock response_70 SUBCELLULAR LOCALIZATION_70.16 mitochondrion	;Pam16;DnaJ;	Signal peptide	E_Evol	E_Evol	E_Evol		0
3nc415_170	NCU00076	NCU00076	NCU00076	conserved hypothetical protein	99 UNCLASSIFIED PROTEINS	;Exonuc_X-T;	Non-secretory protein	F_Evol	F_Evol	F_Evol		0
3nc415_190	NCU00078	NCU00078	NCU00078	conserved hypothetical protein	99 UNCLASSIFIED PROTEINS	NULL	Signal peptide	E_Evol	F_Evol	F_Evol		0
3nc415_200	NCU00079	NCU00079	NCU00079	putative protein	99 UNCLASSIFIED PROTEINS	NULL	Non-secretory protein	F_Evol	N_Evol	N_Evol		0
3nc415_230	NCU00082	NCU00082	NCU00082	hypothetical protein	99 UNCLASSIFIED PROTEINS	NULL	Signal anchor	N_Evol	N_Evol	N_Evol		0
3nc420_010	NCU00084	NCU00084	NCU00084	hypothetical protein	99 UNCLASSIFIED PROTEINS	;SSDP;Extensin_2;	Non-secretory protein	N_Evol	N_Evol	N_Evol		0
3nc420_020	NCU00085	NCU00085	NCU00085	hypothetical protein	99 UNCLASSIFIED PROTEINS	;Extensin_2;RNA_pol_Rpb1_R;RNA_pol_Rpb1_R;RNA_pol_Rpb1_R;RNA_pol_Rpb1_R;RNA_pol_Rpb1_R;C1_3;	Non-secretory protein	F_Evol	N_Evol	N_Evol		0
3nc420_030	NCU00086	NCU00086	NCU00086	related to endo-1,6-alpha-D-mannanase	01 METABOLISM_01.05 C-compound and carbohydrate metabolism_01.05.03 polysaccharide metabolism	;Glyco_hydro_76;	Signal peptide	E_Evol	B_Evol	B_Evol		0
3nc420_040	NCU00087	NCU00087	NCU00087	probable multicopy suppressor of los1-1	11 TRANSCRIPTION_11.04 RNA processing_11.04.02 tRNA processing	;Glucosamine_iso;	Non-secretory protein	E_Evol	E_Evol	E_Evol		0
3nc420_050	NCU00088	NCU00088	NCU00088	probable 4-nitrophenylphosphatase	01 METABOLISM_01.04 phosphate metabolism_01.20 secondary metabolism_70 SUBCELLULAR LOCALIZATION_70.03 cytoplasm	;Hydrolase;	Non-secretory protein	E_Evol	E_Evol	E_Evol		0
3nc420_060	NCU00089	NCU00089	NCU00089	hypothetical protein	99 UNCLASSIFIED PROTEINS	;SET;C1_4;zf-MYND;	Non-secretory protein	F_Evol	F_Evol	F_Evol		0
3nc420_070	NCU00090	NCU00090	NCU00090	related to PacC protein	11 TRANSCRIPTION_11.02 RNA synthesis_11.02.03 mRNA synthesis_11.02.03.04 transcriptional control_16 PROTEIN WITH BINDING FUNCTION OR COFACTOR REQUIREMENT (structural or catalytic)_16.03 nucleic acid binding_16.03.01 DNA binding_34 INTERACTION WITH THE ENVIRONMENT_34.11 cellular sensing and response to external stimulus_34.11.03 chemoperception and response_34.11.03.11 pH response	;zf-C2H2;zf-C2H2;zf-C2H2;	Non-secretory protein	F_Evol	F_Evol	F_Evol		0
3nc420_080	NCU00091	NCU00091	NCU00091	conversion hypothetical protein	99 UNCLASSIFIED PROTEINS	NULL	Non-secretory protein	F_Evol	F_Evol	F_Evol		0
3nc420_090	NCU00092	NCU00092	NCU00092	conserved hypothetical protein	99 UNCLASSIFIED PROTEINS	NULL	Non-secretory protein	B_Evol	F_Evol	F_Evol		0
3nc420_100	NCU00093	NCU00093	NCU00093	hypothetical protein	99 UNCLASSIFIED PROTEINS	NULL	Non-secretory protein	N_Evol	N_Evol	N_Evol		0
3nc420_120	NCU00095	NCU00095	NCU00095	related to tetratricopeptide repeat protein tpr1	34 INTERACTION WITH THE ENVIRONMENT_34.01 homeostasis_34.01.01 homeostasis of cations_34.01.01.01 homeostasis of metal ions (Na, K, Ca etc.)	;TPR_2;TPR_1;TPR_2;TPR_4;TPR_1;TPR_2;TPR_1;TPR_2;TPR_2;TPR_1;TPR_2;TPR_4;TPR_1;TPR_2;TPR_1;TPR_2;TPR_4;TPR_1;TPR_2;TPR_1;TPR_2;MARCKS;TPR_1;TPR_2;	Non-secretory protein	E_Evol	F_Evol	F_Evol		0
3nc420_130	NCU00096	NCU00096	NCU00096	hypothetical protein	99 UNCLASSIFIED PROTEINS	NULL	Non-secretory protein	N_Evol	N_Evol	N_Evol		0
3nc420_140	NCU00097	NCU00097	NCU00097	hypothetical protein	99 UNCLASSIFIED PROTEINS	;GCM;	Non-secretory protein	F_Evol	N_Evol	N_Evol		0
3nc420_160	NCU00100	NCU00100	NCU00100	hypothetical protein	99 UNCLASSIFIED PROTEINS	;Peptidase_C14;Homeobox;Rhodanese;	Non-secretory protein	F_Evol	F_Evol	F_Evol		0
3nc420_180	NCU00102	NCU00102	NCU00102	putative protein	99 UNCLASSIFIED PROTEINS	NULL	Non-secretory protein	E_Evol	B_Evol	F_Evol		0
3nc420_190	NCU00103	NCU00103	NCU00103	hypothetical protein	99 UNCLASSIFIED PROTEINS	NULL	Non-secretory protein	F_Evol	F_Evol	F_Evol		0
3nc420_200	NCU00104	NCU00104	NCU00104	probable heat shock protein HSP104 (endopeptidase Clp ATP-binding chain HSP104)	14 PROTEIN FATE (folding, modification, destination)_14.13 protein/peptide degradation_16 PROTEIN WITH BINDING FUNCTION OR COFACTOR REQUIREMENT (structural or catalytic)_16.19 nucleotide/nucleoside/nucleobase binding_16.19.03 ATP binding_32 CELL RESCUE, DEFENSE AND VIRULENCE_32.01 stress response_32.01.05 heat shock response	;Clp_N;Clp_N;Arch_ATPase;AAA;PIP5K;DUF827;PLU-1;TolA;Torsin;Mg_chelatase;Sigma54_activat;AAA_2;AAA_3;AAA_5;Peptidase_S49_N;	Non-secretory protein	E_Evol	E_Evol	E_Evol		0
3nc420_210	NCU00105	NCU00105	NCU00105	probable NIP7 protein, required for efficient 60S ribosome subunit biogenesis	12 PROTEIN SYNTHESIS_12.01 ribosome biogenesis_70 SUBCELLULAR LOCALIZATION_70.03 cytoplasm_70.10 nucleus	;UPF0113;PUA;	Non-secretory protein	E_Evol	E_Evol	E_Evol		0
3nc420_240	NCU00108	NCU00108	NCU00108	probable protein kinase Eg22	14 PROTEIN FATE (folding, modification, destination)_14.07 protein modification_14.07.03 modification by phosphorylation, dephosphorylation, autophosphorylation_30 CELLULAR COMMUNICATION/SIGNAL TRANSDUCTION MECHANISM_30.01 cellular signalling	;Pkinase;Pkinase_Tyr;Kdo;RIO1;	Non-secretory protein	E_Evol	E_Evol	E_Evol		0
3nc420_260	NCU00110	NCU00110	NCU00110	putative protein	99 UNCLASSIFIED PROTEINS	;DUF761;HPC2;DUF1168;	Non-secretory protein	F_Evol	F_Evol	F_Evol		0
3nc420_280	NCU00112	NCU00112	NCU00112	probable aminopeptidase P, cytoplasmic	14 PROTEIN FATE (folding, modification, destination)_14.13 protein/peptide degradation_70 SUBCELLULAR LOCALIZATION_70.03 cytoplasm	;Creatinase_N;Peptidase_M24;	Non-secretory protein	E_Evol	E_Evol	E_Evol		0
3nc420_290	NCU00113	NCU00113	NCU00113	conserved hypothetical protein	99 UNCLASSIFIED PROTEINS	;IBN_N;Xpo1;tRNA-synt_1b;	Non-secretory protein	F_Evol	F_Evol	F_Evol		0
3nc420_310	NCU00114	NCU00114	NCU00114	related to ribosomal protein S10	12 PROTEIN SYNTHESIS_12.01 ribosome biogenesis_12.01.01 ribosomal proteins	;Ribosomal_S10;	Non-secretory protein	B_Evol	B_Evol	F_Evol		0
3nc420_320	NCU00115	NCU00115	NCU00115	conserved hypothetical protein	99 UNCLASSIFIED PROTEINS	;Fcf2;	Non-secretory protein	E_Evol	E_Evol	F_Evol		0
3nc420_330	NCU00116	NCU00116	NCU00116	CCAAT-binding transcription factor subunit aab-1 AAB-1	11 TRANSCRIPTION_11.02 RNA synthesis_11.02.03 mRNA synthesis_11.02.03.04 transcriptional control_16 PROTEIN WITH BINDING FUNCTION OR COFACTOR REQUIREMENT (structural or catalytic)_16.03 nucleic acid binding_16.03.01 DNA binding_70 SUBCELLULAR LOCALIZATION_70.10 nucleus	;Histone;CBFD_NFYB_HMF;	Non-secretory protein	E_Evol	E_Evol	O_Evol		0
3nc420_340	NCU00117	NCU00117	NCU00117	related to secretory pathway protein (exocyst complex protein Sec15)	20 CELLULAR TRANSPORT, TRANSPORT FACILITIES AND TRANSPORT ROUTES_20.09 transport routes_20.09.07 vesicular transport (Golgi network, etc.)_20.09.16 cellular export and secretion	;DHC_N1;DNA_methylase;DUF155;Sec15;	Non-secretory protein	E_Evol	B_Evol	F_Evol		0
3nc420_360	NCU00119	NCU00119	NCU00119	conserved hypothetical protein	99 UNCLASSIFIED PROTEINS	;Sad1_UNC;S-antigen;	Signal peptide	B_Evol	F_Evol	F_Evol		0
3nc420_370	NCU00120	NCU00120	NCU00120	conserved hypothetical protein	99 UNCLASSIFIED PROTEINS	;DUF1777;DUF1740;	Non-secretory protein	B_Evol	F_Evol	F_Evol		0
3nc420_380	NCU00121	NCU00121	NCU00121	related to CLC chloride channel protein	20 CELLULAR TRANSPORT, TRANSPORT FACILITIES AND TRANSPORT ROUTES_20.03 transport facilities_20.03.01 channel / pore class transport_20.03.01.01 ion channels_34 INTERACTION WITH THE ENVIRONMENT_34.01 homeostasis_34.01.03 homeostasis of anions_34.01.03.05 homeostasis of chloride	;MFS_1;Voltage_CLC;CbiM;CBS;	Non-secretory protein	E_Evol	E_Evol	B_Evol		0
3nc420_400	NCU00123	NCU00123	NCU00123	hypothetical protein	99 UNCLASSIFIED PROTEINS	NULL	Non-secretory protein	N_Evol	N_Evol	N_Evol		0
3nc420_410	NCU00124	NCU00124	NCU00124	hypothetical protein	99 UNCLASSIFIED PROTEINS	;Drf_FH1;GRASP55_65;	Non-secretory protein	F_Evol	F_Evol	N_Evol		0
3nc420_420	NCU00125	NCU00125	NCU00125	hypothetical protein	99 UNCLASSIFIED PROTEINS	;FAD_binding_7;Whi5;	Non-secretory protein	N_Evol	N_Evol	N_Evol		0
3nc420_430	NCU00126	NCU00126	NCU00126	hypothetical protein	99 UNCLASSIFIED PROTEINS	NULL	Non-secretory protein	F_Evol	F_Evol	F_Evol		0
3nc420_440	NCU00127	NCU00127	NCU00127	putative protein	99 UNCLASSIFIED PROTEINS	;DUF1469;	Non-secretory protein	F_Evol	F_Evol	F_Evol		0
3nc425_030	NCU00129	NCU00129	NCU00129	related to AMP-binding protein	01 METABOLISM_01.06 lipid, fatty acid and isoprenoid metabolism	;AMP-binding;	Non-secretory protein	E_Evol	E_Evol	E_Evol		0
3nc425_040	NCU00130	NCU00130	NCU00130	probable beta-glucosidase	01 METABOLISM_01.05 C-compound and carbohydrate metabolism_01.05.02 sugar, glucoside, polyol and carboxylate metabolism_01.05.02.07 sugar, glucoside, polyol and carboxylate catabolism_01.05.03 polysaccharide metabolism	;Glyco_hydro_1;Cellulase;	Non-secretory protein	E_Evol	E_Evol	E_Evol		0
3nc425_060	NCU00132	NCU00132	NCU00132	hypothetical protein	99 UNCLASSIFIED PROTEINS	NULL	Non-secretory protein	F_Evol	F_Evol	F_Evol		0
3nc425_130	NCU00142	NCU00142	NCU00142	hypothetical protein	99 UNCLASSIFIED PROTEINS	;TP2;PBD;NUDE_C;	Non-secretory protein	F_Evol	F_Evol	F_Evol		0
3nc425_140	NCU00143	NCU00143	NCU00143	questionable protein	99 UNCLASSIFIED PROTEINS	NULL	Non-secretory protein	N_Evol	N_Evol	N_Evol		0
3nc430_010	NCU00145	NCU00145	NCU00145	probable histone 3	42 BIOGENESIS OF CELLULAR COMPONENTS_42.10 nucleus_42.10.03 organization of chromosome structure_70 SUBCELLULAR LOCALIZATION_70.10 nucleus_70.10.03 chromosome	;Histone;CBFD_NFYB_HMF;	Non-secretory protein	E_Evol	E_Evol	E_Evol		0
3nc430_020	NCU00146	NCU00146	NCU00146	related to F-LANa protein	98 CLASSIFICATION NOT YET CLEAR-CUT	;DER1;	Signal anchor	E_Evol	E_Evol	E_Evol		0
3nc430_030	NCU00147	NCU00147	NCU00147	conserved hypothetical protein	99 UNCLASSIFIED PROTEINS	;ARD;Cupin_2;	Non-secretory protein	E_Evol	E_Evol	E_Evol		0
3nc430_040	NCU00148	NCU00148	NCU00148	conserved hypothetical protein	99 UNCLASSIFIED PROTEINS	;adh_short;KR;Epimerase;3Beta_HSD;F420_oxidored;Polysacc_synt_2;	Non-secretory protein	E_Evol	F_Evol	F_Evol		0
3nc430_050	NCU00149	NCU00149	NCU00149	hypothetical protein	99 UNCLASSIFIED PROTEINS	NULL	Non-secretory protein	N_Evol	N_Evol	N_Evol		0
3nc430_060	NCU00150	NCU00150	NCU00150	probable 5` Pro-FAR isomerase	01 METABOLISM_01.01 amino acid metabolism_01.01.09 metabolism of the cysteine - aromatic group_01.01.09.07 metabolism of histidine_01.01.09.07.01 biosynthesis of histidine	;His_biosynth;Glyco_hydro_32C;	Non-secretory protein	E_Evol	E_Evol	E_Evol		0
3nc430_070	NCU00151	NCU00151	NCU00151	conserved hypothetical protein	99 UNCLASSIFIED PROTEINS	NULL	Non-secretory protein	A_Evol	F_Evol	F_Evol		0
3nc430_090	NCU00153	NCU00153	NCU00153	related to mitochondrial cytosolically directed NADH dehydrogenase	02 ENERGY_02.13 respiration_70 SUBCELLULAR LOCALIZATION_70.16 mitochondrion	;Pyr_redox_2;Pyr_redox;	Non-secretory protein	E_Evol	E_Evol	E_Evol		0
3nc430_110	NCU00155	NCU00155	NCU00155	related to transcriptional activator Mut3p	11 TRANSCRIPTION_11.02 RNA synthesis_11.02.03 mRNA synthesis_11.02.03.04 transcriptional control_11.02.03.04.01 transcription activation	;Zn_clus;Fungal_trans;	Non-secretory protein	F_Evol	F_Evol	F_Evol		0
3nc430_120	NCU00157	NCU00157	NCU00157	related to COP9 signalosome complex subunit 1 (G protein pathway suppressor 1)	30 CELLULAR COMMUNICATION/SIGNAL TRANSDUCTION MECHANISM_30.01 cellular signalling_30.01.05 enzyme mediated signal transduction	;SspK;PCI;	Non-secretory protein	E_Evol	O_Evol	F_Evol		0
3nc430_130	NCU00158	NCU00158	NCU00158	related to potassium channel regulatory factor	02 ENERGY_02.45 energy conversion and regeneration_02.45.20 regulation of energy conversion / regeneration_11 TRANSCRIPTION_11.04 RNA processing_11.04.03 mRNA processing (splicing, 5'-, 3'-end processing)_11.04.03.01 splicing_16 PROTEIN WITH BINDING FUNCTION OR COFACTOR REQUIREMENT (structural or catalytic)_16.03 nucleic acid binding_16.03.03 RNA binding_34 INTERACTION WITH THE ENVIRONMENT_34.01 …	;UCR_TM;TolA;MAP7;PRP4;Prp18;DUF965;	Non-secretory protein	E_Evol	B_Evol	F_Evol		0
3nc430_140	NCU00159	NCU00159	NCU00159	hypothetical protein	99 UNCLASSIFIED PROTEINS	;SAP18;	Non-secretory protein	B_Evol	F_Evol	F_Evol		0
3nc430_160	NCU00161	NCU00161	NCU00161	conserved hypothetical protein	99 UNCLASSIFIED PROTEINS	;Abhydrolase_1;	Non-secretory protein	B_Evol	F_Evol	F_Evol		0
3nc430_180	NCU00163	NCU00163	NCU00163	related to glucosyltransferase	01 METABOLISM_01.05 C-compound and carbohydrate metabolism_14 PROTEIN FATE (folding, modification, destination)_14.07 protein modification_14.07.02 modification with sugar residues (e.g. glycosylation, deglycosylation)	;Alg6_Alg8;AzlD;CTP_transf_1;	Non-secretory protein	E_Evol	E_Evol	E_Evol		0
3nc430_190	NCU00164	NCU00164	NCU00164	hypothetical protein	99 UNCLASSIFIED PROTEINS	;DDT;	Non-secretory protein	B_Evol	F_Evol	F_Evol		0
3nc430_220	NCU00166	NCU00166	NCU00166	conserved hypothetical protein	99 UNCLASSIFIED PROTEINS	;Isochorismatase;	Non-secretory protein	E_Evol	E_Evol	B_Evol		0
3nc430_240	NCU00168	NCU00168	NCU00168	related to sn2-acylglyceride fatty acyltransferase	01 METABOLISM_01.06 lipid, fatty acid and isoprenoid metabolism	;Acyltransferase;	Non-secretory protein	E_Evol	E_Evol	E_Evol		0
3nc430_250	NCU00169	NCU00169	NCU00169	related to translocation protein SEC63	14 PROTEIN FATE (folding, modification, destination)_14.04 protein targeting, sorting and translocation_70 SUBCELLULAR LOCALIZATION	;DnaJ;Sec63;Fels1;	Non-secretory protein	E_Evol	B_Evol	B_Evol		0
3nc430_260	NCU00170	NCU00170	NCU00170	related to tetratricopeptide repeat protein 2	14 PROTEIN FATE (folding, modification, destination)_14.01 protein folding and stabilization	;Extensin_2;TPR_1;TPR_2;TPR_1;TPR_2;TPR_1;TPR_2;TPR_4;Phage-MuB_C;TPR_1;TPR_2;TPR_4;TPR_1;TPR_2;TPR_1;TPR_2;TPR_1;TPR_2;DnaJ;GRP;	Non-secretory protein	B_Evol	F_Evol	F_Evol		0
3nc435_010	NCU00171	NCU00171	NCU00171	conserved hypothetical protein	99 UNCLASSIFIED PROTEINS	;AflR;efhand;efhand;	Non-secretory protein	F_Evol	F_Evol	F_Evol		0
3nc435_030	NCU00173	NCU00173	NCU00173	probable esterase D	01 METABOLISM_01.06 lipid, fatty acid and isoprenoid metabolism	;Esterase;Peptidase_S15;Peptidase_S9;	Non-secretory protein	E_Evol	E_Evol	E_Evol		0
3nc435_060	NCU00175	NCU00175	NCU00175	hypothetical protein	99 UNCLASSIFIED PROTEINS	NULL	Signal peptide	F_Evol	F_Evol	F_Evol		0
3nc435_070	NCU00176	NCU00176	NCU00176	questionable protein	99 UNCLASSIFIED PROTEINS	NULL	Non-secretory protein	N_Evol	N_Evol	N_Evol		0
3nc435_080	NCU00177	NCU00177	NCU00177	probable bifunctional purine biosynthetic protein	01 METABOLISM_01.03 nucleotide/nucleoside/nucleobase metabolism_01.03.01 purin nucleotide/nucleoside/nucleobase metabolism_70 SUBCELLULAR LOCALIZATION_70.03 cytoplasm	;GARS_N;ATP-grasp_3;GARS_A;ATP-grasp;Dala_Dala_lig_C;CPSase_L_D2;GARS_C;AIRS;AIRS_C;	Non-secretory protein	E_Evol	E_Evol	E_Evol		0
3nc435_100	NCU00180	NCU00180	NCU00180	conserved hypothetical protein	99 UNCLASSIFIED PROTEINS	NULL	Non-secretory protein	F_Evol	F_Evol	F_Evol		0
3nc435_110	NCU00181	NCU00181	NCU00181	related to peptidylprolyl isomerase (cyclophilin)-like	14 PROTEIN FATE (folding, modification, destination)_14.01 protein folding and stabilization	;DUF1233;U-box;Pro_isomerase;	Non-secretory protein	E_Evol	E_Evol	E_Evol		0
3nc435_120	NCU00182	NCU00182	NCU00182	conserved hypothetical protein	99 UNCLASSIFIED PROTEINS	;Lung_7-TM_R;	Signal peptide	B_Evol	B_Evol	F_Evol		0
3nc435_130	NCU00183	NCU00183	NCU00183	conserved hypothetical protein	99 UNCLASSIFIED PROTEINS	;DUF185;	Non-secretory protein	E_Evol	E_Evol	F_Evol		0
3nc435_140	NCU00184	NCU00184	NCU00184	hypothetical protein	99 UNCLASSIFIED PROTEINS	;eIF3_subunit;	Non-secretory protein	F_Evol	F_Evol	F_Evol		0
3nc435_150	NCU00185	NCU00185	NCU00185	hypothetical protein	99 UNCLASSIFIED PROTEINS	;BRCT;	Non-secretory protein	F_Evol	F_Evol	F_Evol		0
3nc435_160	NCU00186	NCU00186	NCU00186	conserved hypothetical protein	99 UNCLASSIFIED PROTEINS	;Zeta_toxin;GshA;DGCR6;	Non-secretory protein	O_Evol	F_Evol	F_Evol		0
3nc435_170	NCU00187	NCU00187	NCU00187	related to carboxyphosphonoenolpyruvate phosphonomutase	01 METABOLISM_01.05 C-compound and carbohydrate metabolism_01.20 secondary metabolism	;ICL;MR_MLE;	Non-secretory protein	E_Evol	E_Evol	E_Evol		0
3nc435_180	NCU00188	NCU00188	NCU00188	related to serine-threonine kinase	14 PROTEIN FATE (folding, modification, destination)_14.07 protein modification_14.07.03 modification by phosphorylation, dephosphorylation, autophosphorylation_30 CELLULAR COMMUNICATION/SIGNAL TRANSDUCTION MECHANISM_30.01 cellular signalling	;Pkinase;Pkinase_Tyr;Extensin_2;	Non-secretory protein	E_Evol	B_Evol	F_Evol		0
3nc435_190	NCU00189	NCU00189	NCU00189	questionable protein	99 UNCLASSIFIED PROTEINS	NULL	Non-secretory protein	N_Evol	N_Evol	N_Evol		0
3nc435_200	NCU00192	NCU00192	NCU00192	hypothetical protein	99 UNCLASSIFIED PROTEINS	NULL	Signal peptide	N_Evol	N_Evol	N_Evol		0
3nc435_210	NCU00193	NCU00193	NCU00193	related to dolichyl-phosphate-mannose-glycolipid alpha-mannosyltransferase	01 METABOLISM_01.06 lipid, fatty acid and isoprenoid metabolism_42 BIOGENESIS OF CELLULAR COMPONENTS_42.01 cell wall_70 SUBCELLULAR LOCALIZATION_70.07 endoplasmic reticulum	;Glyco_transf_22;ABC-3;	Non-secretory protein	E_Evol	F_Evol	F_Evol		0
3nc435_220	NCU00194	NCU00194	NCU00194	probable ornithine aminotransferase	01 METABOLISM_01.01 amino acid metabolism	;Aminotran_3;Beta_elim_lyase;Aminotran_1_2;DUF1223;DUF1737;	Non-secretory protein	E_Evol	E_Evol	E_Evol		0
3nc435_240	NCU00196	NCU00196	NCU00196	related to Rho GTPase activating protein	14 PROTEIN FATE (folding, modification, destination)_14.10 assembly of protein complexes_18 REGULATION OF METABOLISM AND PROTEIN FUNCTION_18.02 regulation of protein activity_18.02.01 enzymatic activity regulation / enzyme regulator_18.02.01.01 enzyme activator_18.02.01.01.01 GTPase activator (GAP)_30 CELLULAR COMMUNICATION/SIGNAL TRANSDUCTION MECHANISM_30.01 cellular signalling_30.01.05 enzyme m…	;RhoGAP;Extensin_2;DUF1777;	Non-secretory protein	F_Evol	F_Evol	F_Evol		0
3nc435_250	NCU00197	NCU00197	NCU00197	questionable protein	99 UNCLASSIFIED PROTEINS	NULL	Non-secretory protein	N_Evol	N_Evol	N_Evol		0
3nc440_010	NCU00198	NCU00198	NCU00198	translocase of inner membrane TIM-9	14 PROTEIN FATE (folding, modification, destination)_14.04 protein targeting, sorting and translocation_16 PROTEIN WITH BINDING FUNCTION OR COFACTOR REQUIREMENT (structural or catalytic)_16.01 protein binding_20 CELLULAR TRANSPORT, TRANSPORT FACILITIES AND TRANSPORT ROUTES_20.09 transport routes_20.09.04 mitochondrial transport_70 SUBCELLULAR LOCALIZATION_70.16 mitochondrion	;zf-Tim10_DDP;	Non-secretory protein	E_Evol	E_Evol	B_Evol		0
3nc440_020	NCU00199	NCU00199	NCU00199	related to nucleoporin nup184	20 CELLULAR TRANSPORT, TRANSPORT FACILITIES AND TRANSPORT ROUTES_20.09 transport routes_20.09.01 nuclear transport_70 SUBCELLULAR LOCALIZATION_70.10 nucleus	NULL	Non-secretory protein	F_Evol	F_Evol	F_Evol		0
3nc440_030	NCU00200	NCU00200	NCU00200	anthranilate synthase component II TRP-1	01 METABOLISM_01.01 amino acid metabolism_01.01.09 metabolism of the cysteine - aromatic group_01.01.09.06 metabolism of tryptophan_01.01.09.06.01 biosynthesis of tryptophan_70 SUBCELLULAR LOCALIZATION_70.03 cytoplasm	;Peptidase_C26;GATase;IGPS;DeoC;PRAI;	Non-secretory protein	E_Evol	B_Evol	B_Evol		0
3nc440_040	NCU00201	NCU00201	NCU00201	hypothetical protein	99 UNCLASSIFIED PROTEINS	;DUF755;	Non-secretory protein	N_Evol	N_Evol	N_Evol		0
3nc440_050	NCU00202	NCU00202	NCU00202	probable coronin	42 BIOGENESIS OF CELLULAR COMPONENTS_42.04 cytoskeleton/structural proteins_42.04.03 actin cytoskeleton_70 SUBCELLULAR LOCALIZATION_70.04 cytoskeleton	;DUF1899;WD40;WD40;WD40;DUF1900;	Non-secretory protein	E_Evol	E_Evol	E_Evol		0
3nc440_070	NCU00205	NCU00205	NCU00205	related to cell division-associated protein	10 CELL CYCLE AND DNA PROCESSING_10.03 cell cycle_10.03.01 mitotic cell cycle and cell cycle control_10.03.03 cytokinesis (cell division) /septum formation and hydrolysis_70 SUBCELLULAR LOCALIZATION_70.10 nucleus	;TPR_2;TPR_1;TPR_2;Coprinus_mating;TPR_2;TPR_1;TPR_2;TPR_1;TPR_2;Peptidase_C50;	Non-secretory protein	B_Evol	F_Evol	F_Evol		0
3nc440_080	NCU00206	NCU00206	NCU00206	probable cellobiose dehydrogenase	01 METABOLISM_01.05 C-compound and carbohydrate metabolism_01.05.03 polysaccharide metabolism	;GMC_oxred_N;DAO;Pyr_redox_2;GMC_oxred_C;CBM_1;	Signal peptide	B_Evol	B_Evol	B_Evol		0
3nc440_090	NCU00207	NCU00207	NCU00207	hypothetical protein	99 UNCLASSIFIED PROTEINS	;2OG-FeII_Oxy;	Non-secretory protein	F_Evol	F_Evol	F_Evol		0
3nc440_100	NCU00208	NCU00208	NCU00208	hypothetical protein	99 UNCLASSIFIED PROTEINS	;Extensin_2;	Non-secretory protein	N_Evol	N_Evol	N_Evol		0
3nc440_110	NCU00209	NCU00209	NCU00209	conserved hypothetical protein	99 UNCLASSIFIED PROTEINS	NULL	Non-secretory protein	F_Evol	F_Evol	F_Evol		0
3nc440_120	NCU00210	NCU00210	NCU00210	probable nuclear cap binding protein subunit 2	11 TRANSCRIPTION_11.04 RNA processing_11.04.03 mRNA processing (splicing, 5'-, 3'-end processing)_11.04.03.03 5'-end processing_20 CELLULAR TRANSPORT, TRANSPORT FACILITIES AND TRANSPORT ROUTES_20.01 transported compounds (substrates)_20.01.21 RNA transport_70 SUBCELLULAR LOCALIZATION_70.10 nucleus	;RRM_1;	Non-secretory protein	E_Evol	E_Evol	E_Evol		0
3nc440_170	NCU00214	NCU00214	NCU00214	conserved hypothetical protein	99 UNCLASSIFIED PROTEINS	;DUF788;	Signal anchor	B_Evol	B_Evol	F_Evol		0
3nc440_180	NCU00215	NCU00215	NCU00215	conserved hypothetical protein	99 UNCLASSIFIED PROTEINS	NULL	Non-secretory protein	F_Evol	F_Evol	F_Evol		0
3nc440_190	NCU00216	NCU00216	NCU00216	probable cytochrome-b5 reductase	01 METABOLISM_01.06 lipid, fatty acid and isoprenoid metabolism_20 CELLULAR TRANSPORT, TRANSPORT FACILITIES AND TRANSPORT ROUTES_20.01 transported compounds (substrates)_20.01.15 electron transport	;FAD_binding_6;NAD_binding_1;	Non-secretory protein	E_Evol	E_Evol	E_Evol		0
3nc440_220	NCU00218	NCU00218	NCU00218	probable ADP-ribosylation factor-like 2	16 PROTEIN WITH BINDING FUNCTION OR COFACTOR REQUIREMENT (structural or catalytic)_16.19 nucleotide/nucleoside/nucleobase binding_16.19.05 GTP binding_20 CELLULAR TRANSPORT, TRANSPORT FACILITIES AND TRANSPORT ROUTES_20.09 transport routes_20.09.07 vesicular transport (Golgi network, etc.)_70 SUBCELLULAR LOCALIZATION_70.08 Golgi	;Arf;MMR_HSR1;Miro;Ras;	Non-secretory protein	E_Evol	E_Evol	E_Evol		0
3nc440_230	NCU00219	NCU00219	NCU00219	putative protein	99 UNCLASSIFIED PROTEINS	;SSDP;Ribosomal_60s;Extensin_2;Sprouty;Gelsolin;Gelsolin;	Non-secretory protein	F_Evol	F_Evol	F_Evol		0
3nc440_240	NCU00220	NCU00220	NCU00220	related to negative transcription regulator	11 TRANSCRIPTION_11.02 RNA synthesis_11.02.03 mRNA synthesis_11.02.03.04 transcriptional control_11.02.03.04.03 transcription repression_70 SUBCELLULAR LOCALIZATION_70.10 nucleus	NULL	Non-secretory protein	F_Evol	F_Evol	F_Evol		0
3nc440_270	NCU00223	NCU00223	NCU00223	related to MEAB protein	11 TRANSCRIPTION_11.02 RNA synthesis_11.02.03 mRNA synthesis_11.02.03.04 transcriptional control	;bZIP_1;	Non-secretory protein	F_Evol	F_Evol	F_Evol		0
3nc440_280	NCU00224	NCU00224	NCU00224	hypothetical protein	99 UNCLASSIFIED PROTEINS	NULL	Non-secretory protein	N_Evol	N_Evol	N_Evol		0
3nc440_290	NCU00225	NCU00225	NCU00225	related to RAY38 protein	01 METABOLISM_01.05 C-compound and carbohydrate metabolism_01.05.25 regulation of C-compound and carbohydrate metabolism	;HABP4_PAI-RBP1;	Non-secretory protein	E_Evol	E_Evol	E_Evol		0
3nc440_310	NCU00227	NCU00227	NCU00227	related to tricarboxylate carrier	20 CELLULAR TRANSPORT, TRANSPORT FACILITIES AND TRANSPORT ROUTES_20.01 transported compounds (substrates)_20.01.03 C-compound and carbohydrate transport_70 SUBCELLULAR LOCALIZATION_70.16 mitochondrion	;Mtc;	Non-secretory protein	E_Evol	E_Evol	E_Evol		0
3nc440_320	NCU00230	NCU00230	NCU00230	related to LAMMER kinase-like protein	14 PROTEIN FATE (folding, modification, destination)_14.07 protein modification_14.07.03 modification by phosphorylation, dephosphorylation, autophosphorylation_30 CELLULAR COMMUNICATION/SIGNAL TRANSDUCTION MECHANISM_30.01 cellular signalling	;HPC2;Pkinase;Pkinase_Tyr;	Non-secretory protein	E_Evol	B_Evol	F_Evol		0
3nc440_330	NCU00231	NCU00231	NCU00231	hypothetical protein	99 UNCLASSIFIED PROTEINS	;MFMR;	Non-secretory protein	N_Evol	N_Evol	N_Evol		0
3nc440_340	NCU00232	NCU00232	NCU00232	related to purine nucleotide binding protein	16 PROTEIN WITH BINDING FUNCTION OR COFACTOR REQUIREMENT (structural or catalytic)_16.19 nucleotide/nucleoside/nucleobase binding_98 CLASSIFICATION NOT YET CLEAR-CUT	;Lactamase_B;	Non-secretory protein	E_Evol	F_Evol	F_Evol		0
3nc440_350	NCU00233	NCU00233	NCU00233	hypothetical protein	99 UNCLASSIFIED PROTEINS	;Glyco_hydro_16;	Signal peptide	F_Evol	F_Evol	F_Evol		0
3nc440_400	NCU00237	NCU00237	NCU00237	related to 3`,5`-cyclic-nucleotide phosphodiesterase	01 METABOLISM_01.03 nucleotide/nucleoside/nucleobase metabolism_01.03.13 regulation of nucleotide/nucleoside/nucleobase metabolism	;PDEase_II;Lactamase_B;Filament_head;	Non-secretory protein	F_Evol	F_Evol	F_Evol		0
3nc440_410	NCU00238	NCU00238	NCU00238	hypothetical protein	99 UNCLASSIFIED PROTEINS	NULL	Non-secretory protein	N_Evol	N_Evol	N_Evol		0
3nc440_420	NCU00239	NCU00239	NCU00239	conserved hypothetical protein	99 UNCLASSIFIED PROTEINS	;DMAP_binding;SWIM;AMP-binding;	Non-secretory protein	A_Evol	A_Evol	A_Evol		0
3nc440_440	NCU00241	NCU00241	NCU00241	hypothetical protein	99 UNCLASSIFIED PROTEINS	;IncA;OmpH;	Non-secretory protein	F_Evol	F_Evol	F_Evol		0
3nc440_470	NCU00244	NCU00244	NCU00244	related to galactinol synthase	01 METABOLISM_01.05 C-compound and carbohydrate metabolism_01.05.03 polysaccharide metabolism	;Glyco_transf_8;	Non-secretory protein	E_Evol	E_Evol	B_Evol		0
3nc440_490	NCU00246	NCU00246	NCU00246	hypothetical protein	99 UNCLASSIFIED PROTEINS	;TspO_MBR;DUF988;	Signal anchor	F_Evol	F_Evol	N_Evol		0
3nc440_500	NCU00247	NCU00247	NCU00247	hypothetical protein	99 UNCLASSIFIED PROTEINS	NULL	Signal anchor	N_Evol	N_Evol	N_Evol		0
3nc440_510	NCU00248	NCU00248	NCU00248	hypothetical protein	99 UNCLASSIFIED PROTEINS	NULL	Signal anchor	N_Evol	N_Evol	N_Evol		0
3nc440_520	NCU00249	NCU00249	NCU00249	related to aspartic proteinase	14 PROTEIN FATE (folding, modification, destination)_14.13 protein/peptide degradation_14.13.01 cytoplasmic and nuclear protein degradation	;DltD_M;Asp;	Signal peptide	F_Evol	F_Evol	F_Evol		0
3nc440_530	NCU00250	NCU00250	NCU00250	putative protein	99 UNCLASSIFIED PROTEINS	NULL	Signal anchor	F_Evol	F_Evol	F_Evol		0
3nc440_540	NCU00251	NCU00251	NCU00251	related to calpain-like protein	14 PROTEIN FATE (folding, modification, destination)_14.13 protein/peptide degradation_30 CELLULAR COMMUNICATION/SIGNAL TRANSDUCTION MECHANISM_30.01 cellular signalling	;Peptidase_C2;DUF612;TolA;Vicilin_N;	Non-secretory protein	F_Evol	F_Evol	F_Evol		0
3nc440_550	NCU00252	NCU00252	NCU00252	hypothetical protein	99 UNCLASSIFIED PROTEINS	NULL	Non-secretory protein	N_Evol	N_Evol	N_Evol		0
3nc440_560	NCU00253	NCU00253	NCU00253	hypothetical protein	99 UNCLASSIFIED PROTEINS	NULL	Non-secretory protein	E_Evol	B_Evol	B_Evol		0
3nc440_570	NCU00254	NCU00254	NCU00254	hypothetical protein	99 UNCLASSIFIED PROTEINS	NULL	Non-secretory protein	N_Evol	N_Evol	N_Evol		0
3nc440_580	NCU00255	NCU00255	NCU00255	hypothetical protein	99 UNCLASSIFIED PROTEINS	NULL	Non-secretory protein	N_Evol	N_Evol	N_Evol		0
3nc440_590	NCU00256	NCU00256	NCU00256	hypothetical protein	99 UNCLASSIFIED PROTEINS	NULL	Non-secretory protein	N_Evol	N_Evol	N_Evol		0
3nc440_610	NCU00258	NCU00258	NCU00258	40S ribosomal protein CRPS-7 CRPS-7	12 PROTEIN SYNTHESIS_12.01 ribosome biogenesis_12.01.01 ribosomal proteins_70 SUBCELLULAR LOCALIZATION_70.03 cytoplasm	;Ribosomal_S7e;	Non-secretory protein	E_Evol	E_Evol	E_Evol		0
3nc440_640	NCU00261	NCU00261	NCU00261	probable CTP synthase	01 METABOLISM_01.03 nucleotide/nucleoside/nucleobase metabolism_01.03.04 pyrimidine nucleotide/nucleoside/nucleobase metabolism	;CTP_synth_N;GATase;Peptidase_C26;	Non-secretory protein	E_Evol	E_Evol	E_Evol		0
3nc440_650	NCU00262	NCU00262	NCU00262	hypothetical protein	99 UNCLASSIFIED PROTEINS	;GATase;	Non-secretory protein	F_Evol	F_Evol	F_Evol		0
3nc440_660	NCU00263	NCU00263	NCU00263	probable subtilisin-like serine protease	14 PROTEIN FATE (folding, modification, destination)_14.13 protein/peptide degradation	;Subtilisin_N;Peptidase_S8;PA;DUF1034;	Signal peptide	E_Evol	E_Evol	B_Evol		0
3nc440_670	NCU00264	NCU00264	NCU00264	conserved hypothetical protein	99 UNCLASSIFIED PROTEINS	;BolA;	Non-secretory protein	E_Evol	B_Evol	F_Evol		0
3nc440_680	NCU00265	NCU00265	NCU00265	putative protein	99 UNCLASSIFIED PROTEINS	NULL	Signal peptide	F_Evol	N_Evol	N_Evol		0
3nc440_700	NCU00267	NCU00267	NCU00267	hypothetical protein	99 UNCLASSIFIED PROTEINS	NULL	Signal peptide	N_Evol	N_Evol	N_Evol		0
3nc440_720	NCU00269	NCU00269	NCU00269	related to histone-lysine N-methyltransferase	10 CELL CYCLE AND DNA PROCESSING_10.01 DNA processing_10.01.09 DNA restriction or modification_10.01.09.05 DNA conformation modification (e.g. chromatin)_11 TRANSCRIPTION_11.02 RNA synthesis_11.02.03 mRNA synthesis_11.02.03.04 transcriptional control_11.02.03.04.03 transcription repression_14 PROTEIN FATE (folding, modification, destination)_14.07 protein modification_14.07.09 posttranslational m…	;Cytochrom_CIII;SET;TFIIS;WW;	Non-secretory protein	B_Evol	B_Evol	F_Evol		0
3nc440_730	NCU00270	NCU00270	NCU00270	putative protein	99 UNCLASSIFIED PROTEINS	NULL	Signal peptide	F_Evol	F_Evol	F_Evol		0
3nc440_740	NCU00271	NCU00271	NCU00271	hypothetical protein	99 UNCLASSIFIED PROTEINS	NULL	Non-secretory protein	N_Evol	N_Evol	N_Evol		0
3nc440_750	NCU00272	NCU00272	NCU00272	related to cullin homolog 4A	10 CELL CYCLE AND DNA PROCESSING_10.03 cell cycle_10.03.01 mitotic cell cycle and cell cycle control	;Cullin;	Non-secretory protein	E_Evol	O_Evol	F_Evol		0
3nc440_760	NCU00273	NCU00273	NCU00273	related to nucleoporin	20 CELLULAR TRANSPORT, TRANSPORT FACILITIES AND TRANSPORT ROUTES_20.03 transport facilities_20.03.01 channel / pore class transport_20.03.01.05 nuclear pore forming protein_20.09 transport routes_20.09.01 nuclear transport_42 BIOGENESIS OF CELLULAR COMPONENTS_42.10 nucleus_42.10.05 nuclear membrane_70 SUBCELLULAR LOCALIZATION_70.10 nucleus_70.10.05 nuclear membrane	NULL	Non-secretory protein	F_Evol	F_Evol	F_Evol		0
3nc440_770	NCU00274	NCU00274	NCU00274	related to phosphotidylinositol kinase	01 METABOLISM_01.06 lipid, fatty acid and isoprenoid metabolism_10 CELL CYCLE AND DNA PROCESSING_10.03 cell cycle_10.03.02 meiosis_42 BIOGENESIS OF CELLULAR COMPONENTS_42.10 nucleus_42.10.03 organization of chromosome structure	;DUF1981;FAT;PI3_PI4_kinase;FATC;	Non-secretory protein	F_Evol	F_Evol	F_Evol		0
3nc440_780	NCU00275	NCU00275	NCU00275	hypothetical protein	99 UNCLASSIFIED PROTEINS	;FYVE;PHD;zf-C3HC4;zf-MIZ;	Non-secretory protein	F_Evol	F_Evol	F_Evol		0
3nc440_790	NCU00276	NCU00276	NCU00276	DNA polymerase gamma POL-G	10 CELL CYCLE AND DNA PROCESSING_10.01 DNA processing_10.01.03 DNA synthesis and replication_16 PROTEIN WITH BINDING FUNCTION OR COFACTOR REQUIREMENT (structural or catalytic)_16.03 nucleic acid binding_16.03.01 DNA binding_70 SUBCELLULAR LOCALIZATION_70.16 mitochondrion	;DNA_pol_A;	Non-secretory protein	E_Evol	E_Evol	B_Evol		0
3nc440_800	NCU00277	NCU00277	NCU00277	related to calponin	98 CLASSIFICATION NOT YET CLEAR-CUT	;CH;Merozoite_SPAM;U79_P34;IncA;TolA;DUF1777;	Non-secretory protein	F_Evol	F_Evol	F_Evol		0
3nc440_810	NCU00278	NCU00278	NCU00278	hypothetical protein	99 UNCLASSIFIED PROTEINS	;NDUFA12;	Non-secretory protein	F_Evol	F_Evol	N_Evol		0
3nc440_820	NCU00279	NCU00279	NCU00279	hypothetical protein	99 UNCLASSIFIED PROTEINS	;Rtt106;	Non-secretory protein	F_Evol	F_Evol	F_Evol		0
3nc440_830	NCU00280	NCU00280	NCU00280	hypothetical protein	99 UNCLASSIFIED PROTEINS	;MAP7;	Non-secretory protein	F_Evol	F_Evol	F_Evol		0
3nc440_840	NCU00281	NCU00281	NCU00281	probable sterol glucosyltransferase	01 METABOLISM_01.06 lipid, fatty acid and isoprenoid metabolism_32 CELL RESCUE, DEFENSE AND VIRULENCE_32.05 disease, virulence and defense_32.05.05 virulence, disease factors	;Dehydrin;Glyco_transf_28;UDPGT;RNA_polI_A14;	Non-secretory protein	F_Evol	F_Evol	F_Evol		0
3nc440_870	NCU00284	NCU00284	NCU00284	hypothetical protein	99 UNCLASSIFIED PROTEINS	NULL	Signal peptide	N_Evol	N_Evol	N_Evol		0
3nc440_880	NCU00285	NCU00285	NCU00285	conserved hypothetical protein	99 UNCLASSIFIED PROTEINS	;zf-C2H2;zf-C2H2;	Non-secretory protein	F_Evol	F_Evol	F_Evol		0
3nc442_020	NCU00288	NCU00288	NCU00288	hypothetical protein	99 UNCLASSIFIED PROTEINS	NULL	Non-secretory protein	N_Evol	N_Evol	N_Evol		0
3nc442_030	NCU00289	NCU00289	NCU00289	conserved hypothetical protein	99 UNCLASSIFIED PROTEINS	;Drf_FH1;Zn_clus;Beta_elim_lyase;Fungal_trans;	Non-secretory protein	F_Evol	F_Evol	F_Evol		0
3nc442_040	NCU00290	NCU00290	NCU00290	related to ATP-binding cassette protein	16 PROTEIN WITH BINDING FUNCTION OR COFACTOR REQUIREMENT (structural or catalytic)_16.19 nucleotide/nucleoside/nucleobase binding_16.19.03 ATP binding_20 CELLULAR TRANSPORT, TRANSPORT FACILITIES AND TRANSPORT ROUTES_20.03 transport facilities_20.03.25 ABC transporters	;MMR_HSR1;ABC_tran;ABC2_membrane;TatC;CTP_transf_1;	Non-secretory protein	E_Evol	E_Evol	B_Evol		0
3nc442_050	NCU00291	NCU00291	NCU00291	hypothetical protein	99 UNCLASSIFIED PROTEINS	;SoxE;	Non-secretory protein	F_Evol	F_Evol	F_Evol		0
3nc442_070	NCU00293	NCU00293	NCU00293	conserved hypothetical protein	99 UNCLASSIFIED PROTEINS	;NUDIX-like;zf-NADH-PPase;NUDIX;	Non-secretory protein	E_Evol	E_Evol	B_Evol		0
3nc442_080	NCU00294	NCU00294	NCU00294	probable ribosomal protein L10a.e, cytosolic	12 PROTEIN SYNTHESIS_12.01 ribosome biogenesis_12.01.01 ribosomal proteins_70 SUBCELLULAR LOCALIZATION_70.03 cytoplasm	;Ribosomal_L1;	Non-secretory protein	E_Evol	E_Evol	E_Evol		0
3nc442_090	NCU00295	NCU00295	NCU00295	conserved hypothetical protein	99 UNCLASSIFIED PROTEINS	;DUF1760;	Non-secretory protein	F_Evol	F_Evol	F_Evol		0
3nc442_100	NCU00296	NCU00296	NCU00296	conserved hypothetical protein	99 UNCLASSIFIED PROTEINS	;SET;	Signal peptide	F_Evol	F_Evol	F_Evol		0
3nc442_110	NCU00297	NCU00297	NCU00297	hypothetical protein	99 UNCLASSIFIED PROTEINS	NULL	Non-secretory protein	N_Evol	N_Evol	N_Evol		0
3nc442_120	NCU00298	NCU00298	NCU00298	related to monocarboxylate transporter 2	20 CELLULAR TRANSPORT, TRANSPORT FACILITIES AND TRANSPORT ROUTES_20.01 transported compounds (substrates)_20.01.03 C-compound and carbohydrate transport_20.09 transport routes_20.09.18 cellular import_70 SUBCELLULAR LOCALIZATION_70.02 eukaryotic plasma membrane / membrane attached	;Cation_ATPase_C;MFS_1;Sugar_tr;	Non-secretory protein	B_Evol	B_Evol	F_Evol		0
3nc442_130	NCU00299	NCU00299	NCU00299	related to delta3-cis-delta2-trans-enoyl-CoA isomerase	01 METABOLISM_01.06 lipid, fatty acid and isoprenoid metabolism_02 ENERGY_02.25 oxidation of fatty acids	;ECH;	Non-secretory protein	E_Evol	E_Evol	B_Evol		0
3nc442_140	NCU00300	NCU00300	NCU00300	conserved hypothetical protein	99 UNCLASSIFIED PROTEINS	;PQ-loop;DUF1753;PQ-loop;	Non-secretory protein	B_Evol	F_Evol	F_Evol		0
3nc442_150	NCU00301	NCU00301	NCU00301	related to SAS10 protein, involved in silencing	11 TRANSCRIPTION_11.02 RNA synthesis_11.02.03 mRNA synthesis_11.02.03.04 transcriptional control_70 SUBCELLULAR LOCALIZATION_70.10 nucleus	;SPT2;Sas10_Utp3;	Non-secretory protein	E_Evol	B_Evol	F_Evol		0
3nc442_160	NCU00302	NCU00302	NCU00302	related to 3-ketosphinganine reductase	01 METABOLISM_01.06 lipid, fatty acid and isoprenoid metabolism	;ADH_zinc_N;adh_short;KR;	Non-secretory protein	E_Evol	E_Evol	F_Evol		0
3nc442_180	NCU00303	NCU00303	NCU00303	related to nuclear WD protein PRL1	11 TRANSCRIPTION_11.02 RNA synthesis_11.02.03 mRNA synthesis_11.02.03.04 transcriptional control	;DUF1771;Smr;	Non-secretory protein	B_Evol	B_Evol	F_Evol		0
3nc442_190	NCU00304	NCU00304	NCU00304	conserved hypothetical protein	99 UNCLASSIFIED PROTEINS	;Ubie_methyltran;MTS;Methyltransf_11;Methyltransf_12;	Non-secretory protein	F_Evol	F_Evol	F_Evol		0
3nc442_200	NCU00305	NCU00305	NCU00305	conserved hypothetical protein	99 UNCLASSIFIED PROTEINS	;adh_short;Epimerase;	Non-secretory protein	O_Evol	O_Evol	F_Evol		0
3nc442_210	NCU00306	NCU00306	NCU00306	probable mfs-multidrug-resistance transporter	20 CELLULAR TRANSPORT, TRANSPORT FACILITIES AND TRANSPORT ROUTES_20.01 transported compounds (substrates)_20.01.27 drug/toxin transport_32 CELL RESCUE, DEFENSE AND VIRULENCE_32.07 detoxification_32.07.05 detoxification by export	;DUF998;MFS_1;Sugar_tr;Na_H_antiport_1;MnhB;	Non-secretory protein	E_Evol	E_Evol	E_Evol		0
3nc442_220	NCU00307	NCU00307	NCU00307	hypothetical protein	99 UNCLASSIFIED PROTEINS	NULL	Non-secretory protein	N_Evol	N_Evol	N_Evol		0
3nc442_230	NCU00308	NCU00308	NCU00308	related to NOL1R protein	98 CLASSIFICATION NOT YET CLEAR-CUT	;Nol1_Nop2_Fmu;Vicilin_N;	Non-secretory protein	B_Evol	F_Evol	F_Evol		0
3nc442_240	NCU00309	NCU00309	NCU00309	conserved hypothetical protein	99 UNCLASSIFIED PROTEINS	;WSC;Defensin_2;	Signal peptide	B_Evol	B_Evol	F_Evol		0
3nc442_250	NCU00310	NCU00310	NCU00310	related to transcription initiation factor TFIIIC	11 TRANSCRIPTION_11.02 RNA synthesis_11.02.02 tRNA synthesis	;TPR_2;PPTA;TPR_1;TPR_2;TPR_1;TPR_2;TPR_1;TPR_2;TPR_1;TPR_2;TPR_1;TPR_2;TPR_1;TPR_2;	Non-secretory protein	B_Evol	F_Evol	F_Evol		0
3nc442_260	NCU00311	NCU00311	NCU00311	conserved hypothetical protein	99 UNCLASSIFIED PROTEINS	;SAM_2;SAM_1;	Non-secretory protein	B_Evol	B_Evol	B_Evol		0
3nc442_280	NCU00312	NCU00312	NCU00312	hypothetical protein	99 UNCLASSIFIED PROTEINS	NULL	Non-secretory protein	N_Evol	N_Evol	N_Evol		0
3nc442_290	NCU00313	NCU00313	NCU00313	hypothetical protein	99 UNCLASSIFIED PROTEINS	;DUF733;	Non-secretory protein	N_Evol	N_Evol	N_Evol		0
3nc442_300	NCU00314	NCU00314	NCU00314	hypothetical protein	99 UNCLASSIFIED PROTEINS	NULL	Non-secretory protein	N_Evol	N_Evol	N_Evol		0
3nc442_310	NCU00315	NCU00315	NCU00315	probable ribosomal protein L29.e, cytosolic	12 PROTEIN SYNTHESIS_12.01 ribosome biogenesis_12.01.01 ribosomal proteins_70 SUBCELLULAR LOCALIZATION_70.03 cytoplasm	;Ribosomal_L29e;	Non-secretory protein	E_Evol	E_Evol	E_Evol		0
3nc442_320	NCU00316	NCU00316	NCU00316	related to peroxisomal ATP carrier	01 METABOLISM_01.06 lipid, fatty acid and isoprenoid metabolism_02 ENERGY_02.25 oxidation of fatty acids_20 CELLULAR TRANSPORT, TRANSPORT FACILITIES AND TRANSPORT ROUTES_20.01 transported compounds (substrates)_20.01.17 nucleotide/nucleoside/nucleobase transport_70 SUBCELLULAR LOCALIZATION_70.19 peroxisome	;Mito_carr;Mito_carr;Mito_carr;	Non-secretory protein	E_Evol	E_Evol	B_Evol		0
3nc442_340	NCU00317	NCU00317	NCU00317	related to calpain-like protease palBory	14 PROTEIN FATE (folding, modification, destination)_14.13 protein/peptide degradation_34 INTERACTION WITH THE ENVIRONMENT_34.11 cellular sensing and response to external stimulus_34.11.03 chemoperception and response_34.11.03.11 pH response	;Peptidase_C2;Calpain_III;	Non-secretory protein	F_Evol	F_Evol	F_Evol		0
3nc442_350	NCU00318	NCU00318	NCU00318	hypothetical protein	99 UNCLASSIFIED PROTEINS	;Ribosomal_L27;	Non-secretory protein	N_Evol	N_Evol	N_Evol		0
3nc442_360	NCU00319	NCU00319	NCU00319	hypothetical protein	99 UNCLASSIFIED PROTEINS	;RNase_P_pop3;	Non-secretory protein	F_Evol	F_Evol	F_Evol		0
3nc442_370	NCU00320	NCU00320	NCU00320	related to DFFRY protein	98 CLASSIFICATION NOT YET CLEAR-CUT	;UCH;HSBP1;DFF-C;	Non-secretory protein	F_Evol	F_Evol	F_Evol		0
3nc442_380	NCU00321	NCU00321	NCU00321	hypothetical protein	99 UNCLASSIFIED PROTEINS	NULL	Non-secretory protein	F_Evol	F_Evol	F_Evol		0
3nc442_390	NCU00322	NCU00322	NCU00322	putative protein	99 UNCLASSIFIED PROTEINS	NULL	Signal peptide	F_Evol	F_Evol	N_Evol		0
3nc442_400	NCU00324	NCU00324	NCU00324	related to stress activated MAP kinase interacting protein	30 CELLULAR COMMUNICATION/SIGNAL TRANSDUCTION MECHANISM_30.01 cellular signalling_30.01.05 enzyme mediated signal transduction_30.01.05.01 protein kinase_30.01.05.01.03 MAPKKK cascade_32 CELL RESCUE, DEFENSE AND VIRULENCE_32.01 stress response	;SIN1;RBD;	Non-secretory protein	B_Evol	F_Evol	F_Evol		0
3nc442_410	NCU00325	NCU00325	NCU00325	hypothetical protein	99 UNCLASSIFIED PROTEINS	NULL	Non-secretory protein	E_Evol	F_Evol	F_Evol		0
3nc442_420	NCU00326	NCU00326	NCU00326	related to senescence marker protein 30	40 CELL FATE_40.20 cell aging	;SGL;	Non-secretory protein	E_Evol	E_Evol	O_Evol		0
3nc442_430	NCU00327	NCU00327	NCU00327	hypothetical protein	99 UNCLASSIFIED PROTEINS	NULL	Non-secretory protein	N_Evol	N_Evol	N_Evol		0
3nc442_440	NCU00329	NCU00329	NCU00329	hypothetical protein	99 UNCLASSIFIED PROTEINS	;MAP7;bZIP_1;bZIP_2;	Non-secretory protein	F_Evol	F_Evol	F_Evol		0
3nc442_450	NCU00330	NCU00330	NCU00330	hypothetical protein	99 UNCLASSIFIED PROTEINS	;DUF1777;	Signal anchor	F_Evol	F_Evol	F_Evol		0
3nc442_460	NCU00331	NCU00331	NCU00331	hypothetical protein	99 UNCLASSIFIED PROTEINS	;Drf_FH1;	Non-secretory protein	N_Evol	N_Evol	N_Evol		0
3nc442_470	NCU00332	NCU00332	NCU00332	putative protein	99 UNCLASSIFIED PROTEINS	;CopD;NnrS;AT_hook;	Non-secretory protein	F_Evol	F_Evol	F_Evol		0
3nc442_480	NCU00333	NCU00333	NCU00333	probable ADP-ribosylation factor-like protein, member of the arf-sar family in the ras superfamily	14 PROTEIN FATE (folding, modification, destination)_14.07 protein modification_16 PROTEIN WITH BINDING FUNCTION OR COFACTOR REQUIREMENT (structural or catalytic)_16.19 nucleotide/nucleoside/nucleobase binding_16.19.05 GTP binding_20 CELLULAR TRANSPORT, TRANSPORT FACILITIES AND TRANSPORT ROUTES_20.09 transport routes_20.09.07 vesicular transport (Golgi network, etc.)	;Arf;MMR_HSR1;Miro;Ras;	Non-secretory protein	E_Evol	E_Evol	E_Evol		0
3nc442_490	NCU00334	NCU00334	NCU00334	probable rRNA processing protein	11 TRANSCRIPTION_11.04 RNA processing_11.04.01 rRNA processing	;RNase_PH;RNase_PH_C;	Non-secretory protein	E_Evol	E_Evol	E_Evol		0
3nc442_500	NCU00335	NCU00335	NCU00335	conserved hypothetical protein	98 CLASSIFICATION NOT YET CLEAR-CUT	;Cwf_Cwc_15;	Non-secretory protein	E_Evol	E_Evol	E_Evol		0
3nc442_510	NCU00336	NCU00336	NCU00336	conserved hypothetical protein	99 UNCLASSIFIED PROTEINS	;HEAT;BRO1;HEAT;HEAT;Med5;HEAT;HEAT;BP28CT;DUF24;MtlR;HEAT;	Non-secretory protein	A_Evol	F_Evol	F_Evol		0
3nc442_520	NCU00337	NCU00337	NCU00337	related to NOC3 protein, required for maturation and intranuclear transport of pre-ribosomes	12 PROTEIN SYNTHESIS_12.01 ribosome biogenesis_14 PROTEIN FATE (folding, modification, destination)_70 SUBCELLULAR LOCALIZATION_70.10 nucleus	;HSP90;NOC3p;Spc24;CBF;	Non-secretory protein	E_Evol	A_Evol	F_Evol		0
3nc442_540	NCU00339	NCU00339	NCU00339	hypothetical protein	99 UNCLASSIFIED PROTEINS	;CFEM;	Signal peptide	N_Evol	N_Evol	N_Evol		0
3nc442_550	NCU00340	NCU00340	NCU00340	Ste12-like transcription factor pp-1	11 TRANSCRIPTION_11.02 RNA synthesis_11.02.03 mRNA synthesis_11.02.03.04 transcriptional control	;STE;zf-TRAF;zf-C2H2;zf-C2H2;	Non-secretory protein	B_Evol	B_Evol	F_Evol		0
3nc442_560	NCU00343	NCU00343	NCU00343	hypothetical protein	99 UNCLASSIFIED PROTEINS	NULL	Non-secretory protein	N_Evol	N_Evol	N_Evol		0
3nc442_570	NCU00344	NCU00344	NCU00344	related to transcription factor	01 METABOLISM_01.01 amino acid metabolism_01.01.13 regulation of amino acid metabolism_11 TRANSCRIPTION_11.02 RNA synthesis_11.02.03 mRNA synthesis_11.02.03.04 transcriptional control	;Extensin_2;Zn_clus;	Non-secretory protein	F_Evol	F_Evol	F_Evol		0
3nc442_580	NCU00345	NCU00345	NCU00345	conserved hypothetical protein	99 UNCLASSIFIED PROTEINS	;HEAT;HEAT;HEAT;HEAT;	Non-secretory protein	F_Evol	F_Evol	F_Evol		0
3nc442_590	NCU00346	NCU00346	NCU00346	related to emopamil-binding protein (phenylalkylamine Ca2+ antagonist binding protein)	16 PROTEIN WITH BINDING FUNCTION OR COFACTOR REQUIREMENT (structural or catalytic)_16.13 C-compound binding_70 SUBCELLULAR LOCALIZATION_70.07 endoplasmic reticulum	;EBP;	Non-secretory protein	O_Evol	F_Evol	N_Evol		0
3nc442_600	NCU00347	NCU00347	NCU00347	putative protein	99 UNCLASSIFIED PROTEINS	;TolA;Apc13p;	Non-secretory protein	F_Evol	F_Evol	F_Evol		0
3nc442_610	NCU00348	NCU00348	NCU00348	conserved hypothetical protein	99 UNCLASSIFIED PROTEINS	;PHF5;PHD;	Non-secretory protein	E_Evol	E_Evol	E_Evol		0
3nc442_620	NCU00349	NCU00349	NCU00349	hypothetical protein	99 UNCLASSIFIED PROTEINS	;Neuromodulin;Vicilin_N;Pinin_SDK_memA;	Non-secretory protein	F_Evol	F_Evol	F_Evol		0
3nc442_630	NCU00350	NCU00350	NCU00350	related to epoxide hydrolase	01 METABOLISM_01.05 C-compound and carbohydrate metabolism_32 CELL RESCUE, DEFENSE AND VIRULENCE_32.07 detoxification_32.07.03 detoxification by modification	;Abhydrolase_1;	Non-secretory protein	E_Evol	B_Evol	F_Evol		0
3nc442_640	NCU00351	NCU00351	NCU00351	conserved hypothetical protein	99 UNCLASSIFIED PROTEINS	;zf-C3HC4;	Non-secretory protein	E_Evol	F_Evol	F_Evol		0
3nc442_650	NCU00352	NCU00352	NCU00352	probable P-type amino-phospholipid-ATPase	20 CELLULAR TRANSPORT, TRANSPORT FACILITIES AND TRANSPORT ROUTES_20.01 transported compounds (substrates)_20.01.01 ion transport_20.01.01.01 cation transport (H+, Na+, K+, Ca2+ , NH4+, etc.)_20.03 transport facilities_20.03.22 transport ATPases_20.09 transport routes_20.09.07 vesicular transport (Golgi network, etc.)_70 SUBCELLULAR LOCALIZATION_70.08 Golgi	;E1-E2_ATPase;Hydrolase;Hydrolase_3;	Non-secretory protein	E_Evol	E_Evol	E_Evol		0
3nc442_660	NCU00353	NCU00353	NCU00353	hypothetical protein	99 UNCLASSIFIED PROTEINS	NULL	Non-secretory protein	N_Evol	N_Evol	N_Evol		0
3nc442_670	NCU00355	NCU00355	NCU00355	catalase-3 CAT-3	32 CELL RESCUE, DEFENSE AND VIRULENCE_32.01 stress response_32.07 detoxification_32.07.07 oxygen and radical detoxification_32.07.07.01 catalase reaction	;Catalase;Catalase-rel;DJ-1_PfpI;	Signal peptide	E_Evol	E_Evol	E_Evol		0
3nc442_680	NCU00356	NCU00356	NCU00356	related to intracellular membrane protein involved in nucleoside transport	20 CELLULAR TRANSPORT, TRANSPORT FACILITIES AND TRANSPORT ROUTES_20.01 transported compounds (substrates)_20.01.17 nucleotide/nucleoside/nucleobase transport	;Herpes_UL20;DUF112;MFS_1;7tm_1;STE3;Oxidored_q3;Nucleoside_tran;PMT;	Non-secretory protein	E_Evol	F_Evol	F_Evol		0
3nc442_700	NCU00358	NCU00358	NCU00358	hypothetical protein	99 UNCLASSIFIED PROTEINS	NULL	Non-secretory protein	F_Evol	F_Evol	F_Evol		0
3nc442_710	NCU00359	NCU00359	NCU00359	conserved hypothetical protein	99 UNCLASSIFIED PROTEINS	;YEATS;	Non-secretory protein	B_Evol	F_Evol	F_Evol		0
3nc442_720	NCU00360	NCU00360	NCU00360	conserved hypothetical protein	99 UNCLASSIFIED PROTEINS	;adh_short;RmlD_sub_bind;Epimerase;NAD_binding_4;	Non-secretory protein	E_Evol	B_Evol	B_Evol		0
3nc442_730	NCU00361	NCU00361	NCU00361	conserved hypothetical protein	99 UNCLASSIFIED PROTEINS	;TP2;SYF2;	Non-secretory protein	E_Evol	B_Evol	F_Evol		0
3nc442_740	NCU00362	NCU00362	NCU00362	hypothetical protein	99 UNCLASSIFIED PROTEINS	;Myotub-related;	Non-secretory protein	N_Evol	N_Evol	N_Evol		0
3nc442_750	NCU00363	NCU00363	NCU00363	conserved hypothetical protein	99 UNCLASSIFIED PROTEINS	NULL	Signal peptide	F_Evol	F_Evol	F_Evol		0
3nc442_760	NCU00364	NCU00364	NCU00364	conserved hypothetical protein	99 UNCLASSIFIED PROTEINS	;DUF1749;Abhydrolase_1;	Non-secretory protein	E_Evol	B_Evol	F_Evol		0
3nc450_010	NCU00366	NCU00366	NCU00366	related to translation initiation factor eIF5	12 PROTEIN SYNTHESIS_12.04 translation_12.04.01 translation initiation_70 SUBCELLULAR LOCALIZATION_70.03 cytoplasm	;eIF-5_eIF-2B;CDtoxinA;TFIIS_C;W2;	Non-secretory protein	E_Evol	E_Evol	E_Evol		0
3nc450_020	NCU00367	NCU00367	NCU00367	hypothetical protein	99 UNCLASSIFIED PROTEINS	;Myosin_tail_1;Vicilin_N;MFAP1_C;Extensin_2;	Non-secretory protein	N_Evol	N_Evol	N_Evol	3nc450_030	3nc450_030
3nc450_030	NCU00368	NCU00368	NCU00368	hypothetical protein	99 UNCLASSIFIED PROTEINS	NULL	Non-secretory protein	N_Evol	N_Evol	N_Evol	3nc450_020	3nc450_020
3nc450_040	NCU00369	NCU00369	NCU00369	conserved hypothetical protein	99 UNCLASSIFIED PROTEINS	;CoaE;	Non-secretory protein	E_Evol	E_Evol	E_Evol		0
3nc450_060	NCU00371	NCU00371	NCU00371	TIM23 translocase TIM23	14 PROTEIN FATE (folding, modification, destination)_14.04 protein targeting, sorting and translocation_20 CELLULAR TRANSPORT, TRANSPORT FACILITIES AND TRANSPORT ROUTES_20.03 transport facilities_20.09 transport routes_20.09.04 mitochondrial transport_70 SUBCELLULAR LOCALIZATION_70.16 mitochondrion	;Tim17;	Non-secretory protein	E_Evol	B_Evol	B_Evol		0
3nc450_080	NCU00373	NCU00373	NCU00373	putative protein	99 UNCLASSIFIED PROTEINS	NULL	Signal peptide	F_Evol	F_Evol	F_Evol		0
3nc450_090	NCU00374	NCU00374	NCU00374	hypothetical protein	99 UNCLASSIFIED PROTEINS	NULL	Non-secretory protein	N_Evol	N_Evol	N_Evol		0
3nc450_100	NCU00375	NCU00375	NCU00375	hypothetical protein	99 UNCLASSIFIED PROTEINS	NULL	Non-secretory protein	N_Evol	N_Evol	N_Evol		0
3nc450_120	NCU00377	NCU00377	NCU00377	conserved hypothetical protein	99 UNCLASSIFIED PROTEINS	;LMBR1;	Non-secretory protein	F_Evol	F_Evol	F_Evol		0
3nc450_130	NCU00378	NCU00378	NCU00378	probable aldehyde dehydrogenase	01 METABOLISM_01.05 C-compound and carbohydrate metabolism	;Aldedh;	Non-secretory protein	E_Evol	E_Evol	E_Evol		0
3nc450_140	NCU00379	NCU00379	NCU00379	hypothetical protein	99 UNCLASSIFIED PROTEINS	NULL	Non-secretory protein	F_Evol	F_Evol	F_Evol		0
3nc450_150	NCU00380	NCU00380	NCU00380	hypothetical protein	99 UNCLASSIFIED PROTEINS	;MIF;	Non-secretory protein	F_Evol	N_Evol	N_Evol		0
3nc450_180	NCU00382	NCU00382	NCU00382	conserved hypothetical protein	99 UNCLASSIFIED PROTEINS	NULL	Non-secretory protein	F_Evol	F_Evol	F_Evol		0
3nc450_190	NCU00384	NCU00384	NCU00384	hypothetical protein	99 UNCLASSIFIED PROTEINS	NULL	Non-secretory protein	N_Evol	N_Evol	N_Evol		0
3nc450_200	NCU00385	NCU00385	NCU00385	ATP synthase delta chain precursor, mitochondrial ATP-16	02 ENERGY_02.45 energy conversion and regeneration_02.45.15 energy generation (e.g. ATP synthase)_20 CELLULAR TRANSPORT, TRANSPORT FACILITIES AND TRANSPORT ROUTES_20.03 transport facilities_20.03.22 transport ATPases_20.09 transport routes_20.09.04 mitochondrial transport_34 INTERACTION WITH THE ENVIRONMENT_34.01 homeostasis_34.01.01 homeostasis of cations_34.01.01.03 homeostasis of protons_70 SU…	;ATP-synt_DE_N;	Non-secretory protein	E_Evol	E_Evol	E_Evol		0
3nc450_260	NCU00391	NCU00391	NCU00391	hypothetical protein	99 UNCLASSIFIED PROTEINS	NULL	Signal anchor	N_Evol	N_Evol	N_Evol		0
3nc450_270	NCU00392	NCU00392	NCU00392	hypothetical protein	99 UNCLASSIFIED PROTEINS	;CENP-B_N;LacI;CenpB-DNA-bind;	Non-secretory protein	F_Evol	F_Evol	F_Evol		0
3nc450_280	NCU00393	NCU00393	NCU00393	hypothetical protein	99 UNCLASSIFIED PROTEINS	;Fork_head_N;	Non-secretory protein	F_Evol	F_Evol	N_Evol		0
3nc450_290	NCU00394	NCU00394	NCU00394	hypothetical protein	99 UNCLASSIFIED PROTEINS	;PXA;	Signal peptide	F_Evol	F_Evol	F_Evol		0
3nc450_340	NCU00398	NCU00398	NCU00398	hypothetical protein	99 UNCLASSIFIED PROTEINS	NULL	Non-secretory protein	F_Evol	F_Evol	F_Evol		0
3nc450_350	NCU00399	NCU00399	NCU00399	conserved hypothetical protein	99 UNCLASSIFIED PROTEINS	NULL	Signal peptide	E_Evol	O_Evol	O_Evol		0
3nc450_360	NCU00400	NCU00400	NCU00400	conserved hypothetical protein	99 UNCLASSIFIED PROTEINS	NULL	Non-secretory protein	F_Evol	F_Evol	F_Evol		0
3nc450_370	NCU00401	NCU00401	NCU00401	conserved hypothetical protein	99 UNCLASSIFIED PROTEINS	;Ubie_methyltran;Methyltransf_11;Methyltransf_12;	Non-secretory protein	F_Evol	F_Evol	F_Evol		0
3nc450_390	NCU00404	NCU00404	NCU00404	related to RNA processing factor 1	12 PROTEIN SYNTHESIS_12.01 ribosome biogenesis_16 PROTEIN WITH BINDING FUNCTION OR COFACTOR REQUIREMENT (structural or catalytic)_16.03 nucleic acid binding_16.03.03 RNA binding_70 SUBCELLULAR LOCALIZATION_70.10 nucleus	;PRP1_N;Brix;	Non-secretory protein	E_Evol	B_Evol	F_Evol		0
3nc450_400	NCU00405	NCU00405	NCU00405	probable glycine--tRNA ligase GRS1	12 PROTEIN SYNTHESIS_12.10 aminoacyl-tRNA-synthetases_70 SUBCELLULAR LOCALIZATION_70.03 cytoplasm	;tRNA-synt_2b;bZIP_1;HGTP_anticodon;	Non-secretory protein	E_Evol	E_Evol	E_Evol		0
3nc450_410	NCU00406	NCU00406	NCU00406	probable protein kinase CHM1	14 PROTEIN FATE (folding, modification, destination)_14.07 protein modification_14.07.03 modification by phosphorylation, dephosphorylation, autophosphorylation_30 CELLULAR COMMUNICATION/SIGNAL TRANSDUCTION MECHANISM_30.01 cellular signalling	;PH;Extensin_2;PBD;Pkinase;Pkinase_Tyr;APH;Rota_NS6;	Non-secretory protein	E_Evol	E_Evol	B_Evol		0
3nc450_420	NCU00407	NCU00407	NCU00407	putative protein	99 UNCLASSIFIED PROTEINS	;Extensin_2;	Non-secretory protein	F_Evol	F_Evol	F_Evol		0
3nc450_450	NCU00409	NCU00409	NCU00409	related to bifunctional P-protein (chorismate mutase-P/prephenate dehydratase)	01 METABOLISM_01.01 amino acid metabolism_01.01.09 metabolism of the cysteine - aromatic group_01.01.09.04 metabolism of phenylalanine_01.01.09.04.01 biosynthesis of phenylalanine	;PDT;ACT;	Non-secretory protein	E_Evol	F_Evol	F_Evol		0
3nc450_460	NCU00410	NCU00410	NCU00410	eukaryotic release factor 1 eRF1	12 PROTEIN SYNTHESIS_12.04 translation_12.04.03 translation termination_70 SUBCELLULAR LOCALIZATION_70.03 cytoplasm	;eRF1_1;eRF1_2;eRF1_3;	Non-secretory protein	E_Evol	E_Evol	E_Evol		0
3nc450_470	NCU00411	NCU00411	NCU00411	hypothetical protein	99 UNCLASSIFIED PROTEINS	;DUF1770;	Non-secretory protein	F_Evol	F_Evol	N_Evol		0
3nc450_480	NCU00412	NCU00412	NCU00412	hypothetical protein	99 UNCLASSIFIED PROTEINS	NULL	Non-secretory protein	F_Evol	F_Evol	F_Evol		0
3nc450_490	NCU00413	NCU00413	NCU00413	probable 60S ribosomal protein L8.e	12 PROTEIN SYNTHESIS_12.01 ribosome biogenesis_12.01.01 ribosomal proteins_70 SUBCELLULAR LOCALIZATION_70.03 cytoplasm	;Ribosomal_L2;Ribosomal_L2_C;	Non-secretory protein	E_Evol	E_Evol	E_Evol		0
3nc450_510	NCU00415	NCU00415	NCU00415	conserved hypothetical protein	99 UNCLASSIFIED PROTEINS	;V-ATPase_H;tRNA-synt_1c;	Non-secretory protein	F_Evol	F_Evol	F_Evol		0
3nc450_520	NCU00416	NCU00416	NCU00416	hypothetical protein	99 UNCLASSIFIED PROTEINS	;zf-C2H2;zf-C2H2;	Non-secretory protein	E_Evol	F_Evol	F_Evol		0
3nc450_530	NCU00417	NCU00417	NCU00417	probable G10 protein	43 CELL TYPE DIFFERENTIATION_43.01 fungal/microorganismic cell type differentiation_43.01.03 fungal and other eukaryotic cell type differentiation	;G10;	Non-secretory protein	E_Evol	E_Evol	E_Evol		0
3nc450_540	NCU00418	NCU00418	NCU00418	NADH2 dehydrogenase (ubiquinone)	02 ENERGY_02.11 electron transport and membrane-associated energy conservation_70 SUBCELLULAR LOCALIZATION_70.16 mitochondrion	;Complex1_LYR;	Non-secretory protein	E_Evol	E_Evol	B_Evol		0
3nc450_550	NCU00419	NCU00419	NCU00419	probable DNA-directed RNA polymerase I/III chain AC19	11 TRANSCRIPTION_11.02 RNA synthesis_11.02.01 rRNA synthesis_11.02.02 tRNA synthesis_70 SUBCELLULAR LOCALIZATION_70.10 nucleus	;RNA_pol_L;	Non-secretory protein	E_Evol	E_Evol	A_Evol		0
3nc452_010	NCU00420	NCU00420	NCU00420	putative protein	99 UNCLASSIFIED PROTEINS	;Extensin_2;	Non-secretory protein	F_Evol	F_Evol	F_Evol		0
b13b7_230	NCU00421	NCU00421	NCU00421	related to transcription factor snf5p	11 TRANSCRIPTION_11.02 RNA synthesis_11.02.03 mRNA synthesis_11.02.03.04 transcriptional control	;SNF5;	Non-secretory protein	F_Evol	F_Evol	F_Evol		0
b13b7_220	NCU00422	NCU00422	NCU00422	related to 442K curved dna-binding protein	16 PROTEIN WITH BINDING FUNCTION OR COFACTOR REQUIREMENT (structural or catalytic)_16.03 nucleic acid binding_16.03.01 DNA binding	;Peptidase_M24;	Non-secretory protein	E_Evol	E_Evol	E_Evol		0
b13b7_210	NCU00423	NCU00423	NCU00423	putative protein	99 UNCLASSIFIED PROTEINS	;Extensin_2;PHD;PHD;	Non-secretory protein	F_Evol	F_Evol	F_Evol		0
b13b7_190	NCU00425	NCU00425	NCU00425	hypothetical protein	99 UNCLASSIFIED PROTEINS	NULL	Non-secretory protein	N_Evol	N_Evol	N_Evol		0
b13b7_180	NCU00426	NCU00426	NCU00426	conserved hypothetical protein	99 UNCLASSIFIED PROTEINS	;Lactamase_B;	Non-secretory protein	F_Evol	F_Evol	F_Evol		0
b13b7_170	NCU00427	NCU00427	NCU00427	hypothetical protein	99 UNCLASSIFIED PROTEINS	;YjeF_N;	Non-secretory protein	F_Evol	F_Evol	F_Evol		0
b13b7_160	NCU00428	NCU00428	NCU00428	related to PIF1 protein precursor	10 CELL CYCLE AND DNA PROCESSING_10.01 DNA processing_10.01.05 DNA recombination and DNA repair_10.01.05.01 DNA repair_10.01.05.03 DNA recombination	;NB-ARC;DEAD;AAA;AAA_5;DUF889;	Non-secretory protein	E_Evol	B_Evol	A_Evol		0
b13b7_150	NCU00429	NCU00429	NCU00429	hypothetical protein	99 UNCLASSIFIED PROTEINS	NULL	Non-secretory protein	N_Evol	N_Evol	N_Evol		0
b13b7_140	NCU00430	NCU00430	NCU00430	related to Na+/H+ antiporter CNH1	20 CELLULAR TRANSPORT, TRANSPORT FACILITIES AND TRANSPORT ROUTES_20.01 transported compounds (substrates)_20.01.01 ion transport_20.01.01.01 cation transport (H+, Na+, K+, Ca2+ , NH4+, etc.)_20.03 transport facilities_20.03.02 carrier (electrochemical potential-driven transport)_20.03.02.03 antiporter_32 CELL RESCUE, DEFENSE AND VIRULENCE_32.01 stress response_32.01.03 osmotic and salt stress res…	;MFS_1;Na_H_Exchanger;TatC;Oxidored_q1;Nha1_C;Statherin;	Non-secretory protein	B_Evol	B_Evol	A_Evol		0
b13b7_130	NCU00431	NCU00431	NCU00431	mitochondrial import receptor subunit tom-22 TOM-22	14 PROTEIN FATE (folding, modification, destination)_14.04 protein targeting, sorting and translocation_20 CELLULAR TRANSPORT, TRANSPORT FACILITIES AND TRANSPORT ROUTES_20.03 transport facilities_20.09 transport routes_20.09.04 mitochondrial transport_70 SUBCELLULAR LOCALIZATION_70.16 mitochondrion	;Tom22;	Non-secretory protein	E_Evol	B_Evol	F_Evol		0
b13b7_100	NCU00435	NCU00435	NCU00435	probable class E vacuolar-protein sorting and endocytosis factor	14 PROTEIN FATE (folding, modification, destination)_14.04 protein targeting, sorting and translocation_20 CELLULAR TRANSPORT, TRANSPORT FACILITIES AND TRANSPORT ROUTES_20.09 transport routes_20.09.13 vacuolar/lysosomal transport_70 SUBCELLULAR LOCALIZATION_70.25 vacuole or lysosome	;Snf7;	Non-secretory protein	E_Evol	E_Evol	E_Evol		0
b13b7_090	NCU00436	NCU00436	NCU00436	related to GTP-binding protein FZO1, required for biogenesis of mitochondria	16 PROTEIN WITH BINDING FUNCTION OR COFACTOR REQUIREMENT (structural or catalytic)_16.19 nucleotide/nucleoside/nucleobase binding_16.19.05 GTP binding_42 BIOGENESIS OF CELLULAR COMPONENTS_42.16 mitochondrion_70 SUBCELLULAR LOCALIZATION_70.16 mitochondrion	;AIG1;MMR_HSR1;CbiA;Miro;Dynamin_N;GTP_EFTU;GCN5L1;	Non-secretory protein	B_Evol	B_Evol	B_Evol		0
b13b7_080	NCU00437	NCU00437	NCU00437	related to nitrilase	01 METABOLISM_01.01 amino acid metabolism_01.01.09 metabolism of the cysteine - aromatic group_01.01.09.06 metabolism of tryptophan_01.01.09.06.02 degradation of tryptophan_01.02 nitrogen, sulfur and selenium metabolism	;CN_hydrolase;	Non-secretory protein	E_Evol	O_Evol	O_Evol		0
b13b7_060	NCU00440	NCU00440	NCU00440	g protein beta subunit Gnb-1	16 PROTEIN WITH BINDING FUNCTION OR COFACTOR REQUIREMENT (structural or catalytic)_16.19 nucleotide/nucleoside/nucleobase binding_16.19.05 GTP binding_30 CELLULAR COMMUNICATION/SIGNAL TRANSDUCTION MECHANISM_30.01 cellular signalling_30.01.05 enzyme mediated signal transduction_30.01.05.05 G-protein mediated signal transduction_30.01.05.05.03 trimeric G-protein mediated signal transduction	;DUF683;WD40;WD40;WD40;WD40;WD40;WD40;WD40;	Non-secretory protein	E_Evol	E_Evol	E_Evol		0
b13b7_050	NCU00441	NCU00441	NCU00441	probable phosducin	18 REGULATION OF METABOLISM AND PROTEIN FUNCTION_18.02 regulation of protein activity_18.02.05 regulator of G-protein signalling	;Phosducin;	Non-secretory protein	F_Evol	F_Evol	F_Evol		0
b13b7_030	NCU00442	NCU00442	NCU00442	putative protein	99 UNCLASSIFIED PROTEINS	;SP2;	Non-secretory protein	F_Evol	F_Evol	F_Evol		0
b13b7_020	NCU00443	NCU00443	NCU00443	probable spi1-GTP-binding protein	10 CELL CYCLE AND DNA PROCESSING_10.03 cell cycle_10.03.01 mitotic cell cycle and cell cycle control	;MAP7;Ran_BP1;WH1;	Non-secretory protein	E_Evol	E_Evol	E_Evol		0
3nc454_010	NCU00445	NCU00445	NCU00445	related to ARO80 - positive transcription regulator of ARO9 and ARO10	11 TRANSCRIPTION_11.02 RNA synthesis_11.02.03 mRNA synthesis_11.02.03.04 transcriptional control	;eIF-4B;Zn_clus;	Non-secretory protein	F_Evol	F_Evol	F_Evol		0
b2c16_310	NCU00446	NCU00446	NCU00446	related to acetoacetyl-CoA synthetase	01 METABOLISM_01.06 lipid, fatty acid and isoprenoid metabolism	;AMP-binding;	Non-secretory protein	E_Evol	E_Evol	E_Evol		0
b2c16_300	NCU00447	NCU00447	NCU00447	probable serine palmitoyl transferase subunit	01 METABOLISM_01.06 lipid, fatty acid and isoprenoid metabolism_01.07 metabolism of vitamins, cofactors, and prosthetic groups_01.07.01 biosynthesis of vitamins, cofactors, and prosthetic groups	;Aminotran_1_2;SHMT;DegT_DnrJ_EryC1;Aminotran_5;Beta_elim_lyase;PUA;	Non-secretory protein	E_Evol	E_Evol	E_Evol		0
b2c16_290	NCU00448	NCU00448	NCU00448	hypothetical protein	99 UNCLASSIFIED PROTEINS	;Dehydrin;	Non-secretory protein	F_Evol	F_Evol	F_Evol		0
b2c16_280	NCU00449	NCU00449	NCU00449	conserved hypothetical protein	99 UNCLASSIFIED PROTEINS	NULL	Signal peptide	B_Evol	B_Evol	B_Evol		0
b2c16_260	NCU00451	NCU00451	NCU00451	conserved hypothetical protein	99 UNCLASSIFIED PROTEINS	;Ubie_methyltran;Methyltransf_4;MTS;Methyltransf_11;Methyltransf_12;	Non-secretory protein	B_Evol	F_Evol	F_Evol		0
b2c16_250	NCU00453	NCU00453	NCU00453	probable NA+-H+ antiporter	20 CELLULAR TRANSPORT, TRANSPORT FACILITIES AND TRANSPORT ROUTES_20.03 transport facilities_20.03.02 carrier (electrochemical potential-driven transport)_20.03.02.03 antiporter_20.03.02.03.01 proton driven antiporter_32 CELL RESCUE, DEFENSE AND VIRULENCE_32.01 stress response_34 INTERACTION WITH THE ENVIRONMENT_34.01 homeostasis_34.01.01 homeostasis of cations_34.01.01.01 homeostasis of metal ion…	;FtsX;CitMHS;Na_H_Exchanger;DUF112;AzlD;DUF897;Branch_AA_trans;Sugar_transport;Cation_efflux;	Non-secretory protein	E_Evol	B_Evol	B_Evol		0
b2c16_240	NCU00454	NCU00454	NCU00454	hypothetical protein	99 UNCLASSIFIED PROTEINS	;MAP7;	Non-secretory protein	F_Evol	F_Evol	F_Evol		0
b2c16_230	NCU00455	NCU00455	NCU00455	related to MAP kinase pathway-interacting Ubc2	30 CELLULAR COMMUNICATION/SIGNAL TRANSDUCTION MECHANISM_30.01 cellular signalling_30.01.05 enzyme mediated signal transduction_30.01.05.01 protein kinase_30.01.05.01.03 MAPKKK cascade_32 CELL RESCUE, DEFENSE AND VIRULENCE_32.05 disease, virulence and defense_32.05.05 virulence, disease factors_34 INTERACTION WITH THE ENVIRONMENT_34.11 cellular sensing and response to external stimulus_34.11.03 ch…	;Fib_alpha;SAM_2;Ste50p-SAM;SAM_1;RA;	Non-secretory protein	F_Evol	F_Evol	F_Evol		0
b2c16_220	NCU00456	NCU00456	NCU00456	putative protein	99 UNCLASSIFIED PROTEINS	;MAPEG;	Signal peptide	E_Evol	E_Evol	B_Evol		0
b2c16_210	NCU00457	NCU00457	NCU00457	related to translation initiation factor eIF-4B	12 PROTEIN SYNTHESIS_12.04 translation_12.04.01 translation initiation	;RRM_1;MAP7;	Non-secretory protein	E_Evol	E_Evol	F_Evol		0
b2c16_200	NCU00458	NCU00458	NCU00458	putative protein	99 UNCLASSIFIED PROTEINS	NULL	Non-secretory protein	F_Evol	F_Evol	F_Evol		0
b2c16_190	NCU00459	NCU00459	NCU00459	conserved hypothetical protein	99 UNCLASSIFIED PROTEINS	;rRNA_processing;	Non-secretory protein	A_Evol	F_Evol	F_Evol		0
b2c16_180	NCU00461	NCU00461	NCU00461	glutamate dehydrogenase, NAD(+)-specific	01 METABOLISM_01.01 amino acid metabolism_01.01.03 assimilation of ammonia, metabolism of the glutamate group_01.01.03.02 metabolism of glutamate_01.01.03.02.02 degradation of glutamate	;ELFV_dehydrog_N;ELFV_dehydrog;L15;	Non-secretory protein	E_Evol	B_Evol	B_Evol		0
b2c16_160	NCU00463	NCU00463	NCU00463	related to kynureninase	01 METABOLISM_01.01 amino acid metabolism_01.01.09 metabolism of the cysteine - aromatic group_01.01.09.06 metabolism of tryptophan_01.01.09.06.02 degradation of tryptophan_01.07 metabolism of vitamins, cofactors, and prosthetic groups_01.07.01 biosynthesis of vitamins, cofactors, and prosthetic groups	;Aminotran_5;	Non-secretory protein	E_Evol	E_Evol	E_Evol		0
b2c16_140	NCU00465	NCU00465	NCU00465	related to DnaJ homolog subfamily A member 2	14 PROTEIN FATE (folding, modification, destination)_14.01 protein folding and stabilization	;DnaJ;DnaJ_CXXCXGXG;DnaJ_C;	Non-secretory protein	E_Evol	E_Evol	E_Evol		0
b2c16_120	NCU00467	NCU00467	NCU00467	probable COP9 signalosome subunit 5 CSN5	34 INTERACTION WITH THE ENVIRONMENT_34.11 cellular sensing and response to external stimulus_34.11.01 photoperception and response_41 DEVELOPMENT (Systemic)_41.01 fungal/microorganismic development	;Mov34;	Non-secretory protein	E_Evol	E_Evol	E_Evol		0
b2c16_100	NCU00469	NCU00469	NCU00469	related to alpha-tubulin suppressor	42 BIOGENESIS OF CELLULAR COMPONENTS_42.04 cytoskeleton/structural proteins_42.04.05 microtubule cytoskeleton	;RCC1;RCC1;	Non-secretory protein	E_Evol	E_Evol	F_Evol		0
b2c16_090	NCU00470	NCU00470	NCU00470	related to rad9 protein	10 CELL CYCLE AND DNA PROCESSING_10.01 DNA processing_10.01.05 DNA recombination and DNA repair_10.01.05.01 DNA repair_32 CELL RESCUE, DEFENSE AND VIRULENCE_32.05 disease, virulence and defense_32.05.01 resistance proteins	NULL	Non-secretory protein	F_Evol	F_Evol	F_Evol		0
b2c16_080	NCU00471	NCU00471	NCU00471	hypothetical protein	99 UNCLASSIFIED PROTEINS	;PSRT;	Non-secretory protein	N_Evol	N_Evol	N_Evol		0
b2c16_070	NCU00472	NCU00472	NCU00472	related to Hsp90 co-chaperone Cdc37	14 PROTEIN FATE (folding, modification, destination)_14.01 protein folding and stabilization_16 PROTEIN WITH BINDING FUNCTION OR COFACTOR REQUIREMENT (structural or catalytic)_16.01 protein binding	;CDC37_N;PspA_IM30;CDC37_M;CDC37_C;RuvB_N;	Non-secretory protein	B_Evol	B_Evol	B_Evol		0
b2c16_060	NCU00473	NCU00473	NCU00473	conserved hypothetical protein	99 UNCLASSIFIED PROTEINS	NULL	Signal peptide	E_Evol	B_Evol	F_Evol		0
b2c16_050	NCU00474	NCU00474	NCU00474	hypothetical protein	99 UNCLASSIFIED PROTEINS	NULL	Non-secretory protein	F_Evol	N_Evol	N_Evol		0
b2c16_040	NCU00475	NCU00475	NCU00475	probable 40S ribosomal protein S18	12 PROTEIN SYNTHESIS_12.01 ribosome biogenesis_12.01.01 ribosomal proteins	;Ribosomal_S13;	Non-secretory protein	E_Evol	E_Evol	E_Evol		0
b2c16_020	NCU00477	NCU00477	NCU00477	probable Carboxypeptidase	14 PROTEIN FATE (folding, modification, destination)_14.13 protein/peptide degradation_14.13.04 lysosomal and vacuolar protein degradation	;Carbpep_Y_N;Peptidase_S10;	Signal peptide	E_Evol	E_Evol	B_Evol		0
b2c16_010	NCU00478	NCU00478	NCU00478	related to cAMP specific phosphodiesterase	30 CELLULAR COMMUNICATION/SIGNAL TRANSDUCTION MECHANISM_30.01 cellular signalling_30.01.09 second messenger mediated signal transduction_30.01.09.07 cAMP/cGMP mediated signal transduction	;PDEase_I;	Non-secretory protein	F_Evol	F_Evol	F_Evol		0
3nc460_010	NCU00479	NCU00479	NCU00479	putative protein	99 UNCLASSIFIED PROTEINS	NULL	Non-secretory protein	N_Evol	N_Evol	N_Evol		0
3nc460_020	NCU00480	NCU00480	NCU00480	related to ubiquitin C-terminal hydrolase	14 PROTEIN FATE (folding, modification, destination)_14.07 protein modification_14.07.05 modification by ubiquitination, deubiquitination_14.13 protein/peptide degradation_14.13.01 cytoplasmic and nuclear protein degradation	;DUF1055;UCH;	Non-secretory protein	B_Evol	F_Evol	F_Evol		0
3nc460_030	NCU00481	NCU00481	NCU00481	related to insulysin precursor (metalloendopeptidase)	14 PROTEIN FATE (folding, modification, destination)_14.13 protein/peptide degradation_34 INTERACTION WITH THE ENVIRONMENT_34.11 cellular sensing and response to external stimulus_34.11.03 chemoperception and response_34.11.03.07 pheromone response, mating-type determination, sex-specific proteins	;Peptidase_M16;Peptidase_M16_C;Peptidase_M16_C;	Non-secretory protein	E_Evol	E_Evol	E_Evol		0
3nc460_040	NCU00483	NCU00483	NCU00483	hypothetical protein	99 UNCLASSIFIED PROTEINS	;zf-CCHC;	Non-secretory protein	F_Evol	F_Evol	F_Evol		0
3nc460_050	NCU00484	NCU00484	NCU00484	related to NADH2 dehydrogenase (ubiquinone) complex I 13K-A chain precursor	02 ENERGY_02.11 electron transport and membrane-associated energy conservation_70 SUBCELLULAR LOCALIZATION_70.16 mitochondrion	NULL	Non-secretory protein	E_Evol	E_Evol	B_Evol		0
3nc460_060	NCU00485	NCU00485	NCU00485	hypothetical protein	99 UNCLASSIFIED PROTEINS	NULL	Non-secretory protein	N_Evol	N_Evol	N_Evol		0
3nc460_070	NCU00486	NCU00486	NCU00486	putative protein	99 UNCLASSIFIED PROTEINS	;Extensin_2;	Non-secretory protein	F_Evol	F_Evol	F_Evol		0
3nc460_080	NCU00487	NCU00487	NCU00487	related to anther-expressed protein SLL2-S9	98 CLASSIFICATION NOT YET CLEAR-CUT	;Methyltransf_11;Methyltransf_12;	Non-secretory protein	E_Evol	E_Evol	B_Evol		0
3nc460_090	NCU00488	NCU00488	NCU00488	probable protein phosphotase 2A A chain	10 CELL CYCLE AND DNA PROCESSING_10.03 cell cycle_10.03.03 cytokinesis (cell division) /septum formation and hydrolysis_14 PROTEIN FATE (folding, modification, destination)_14.07 protein modification_14.07.03 modification by phosphorylation, dephosphorylation, autophosphorylation_40 CELL FATE_40.01 cell growth / morphogenesis	;E2_bind;HEAT;HEAT;HEAT;YtxC;HEAT;HEAT;HEAT;HEAT;HEAT;HEAT;HEAT;HEAT;HEAT;	Non-secretory protein	E_Evol	E_Evol	E_Evol		0
3nc460_110	NCU00489	NCU00489	NCU00489	probable S3 ribosomal protein	12 PROTEIN SYNTHESIS_12.01 ribosome biogenesis_12.01.01 ribosomal proteins	;KH_2;Ribosomal_S3_C;	Non-secretory protein	E_Evol	E_Evol	E_Evol		0
3nc460_120	NCU00490	NCU00490	NCU00490	conserved hypothetical protein	99 UNCLASSIFIED PROTEINS	;DUF803;DUF989;Peptidase_M50;DUF6;DUF973;Cons_hypoth698;COX4_pro;	Non-secretory protein	E_Evol	E_Evol	E_Evol		0
3nc460_130	NCU00491	NCU00491	NCU00491	hypothetical protein	99 UNCLASSIFIED PROTEINS	NULL	Non-secretory protein	N_Evol	N_Evol	N_Evol		0
3nc460_140	NCU00492	NCU00492	NCU00492	hypothetical protein	99 UNCLASSIFIED PROTEINS	;Vicilin_N;	Non-secretory protein	F_Evol	N_Evol	N_Evol		0
3nc460_150	NCU00493	NCU00493	NCU00493	related to coatomer delta subunit (delta-coat protein)	14 PROTEIN FATE (folding, modification, destination)_14.10 assembly of protein complexes_42 BIOGENESIS OF CELLULAR COMPONENTS_42.09 intracellular transport vesicles_70 SUBCELLULAR LOCALIZATION_70.03 cytoplasm	;Clat_adaptor_s;Adap_comp_sub;	Non-secretory protein	E_Evol	E_Evol	E_Evol		0
3nc460_160	NCU00494	NCU00494	NCU00494	related to cyclosome/APC subunit Cut20/Apc4	10 CELL CYCLE AND DNA PROCESSING_10.03 cell cycle_10.03.01 mitotic cell cycle and cell cycle control_14 PROTEIN FATE (folding, modification, destination)_14.10 assembly of protein complexes	NULL	Non-secretory protein	F_Evol	F_Evol	F_Evol		0
3nc460_170	NCU00495	NCU00495	NCU00495	related to Snf1p protein kinase interacting protein (SIP3 protein)	01 METABOLISM_01.05 C-compound and carbohydrate metabolism_01.05.25 regulation of C-compound and carbohydrate metabolism_30 CELLULAR COMMUNICATION/SIGNAL TRANSDUCTION MECHANISM_30.01 cellular signalling	;SRP72;NifW;PH;GRAM;	Non-secretory protein	F_Evol	F_Evol	F_Evol		0
3nc462_010	NCU00496	NCU00496	NCU00496	hypothetical protein	99 UNCLASSIFIED PROTEINS	;RRM_1;	Non-secretory protein	N_Evol	N_Evol	N_Evol		0
3nc462_020	NCU00497	NCU00497	NCU00497	hypothetical protein	99 UNCLASSIFIED PROTEINS	NULL	Non-secretory protein	F_Evol	F_Evol	F_Evol		0
1nc600_010	NCU00499	NCU00499	NCU00499	putative protein	99 UNCLASSIFIED PROTEINS	;bZIP_Maf;bZIP_1;bZIP_2;Sds3;	Non-secretory protein	F_Evol	F_Evol	F_Evol		0
1nc600_020	NCU00500	NCU00500	NCU00500	hypothetical protein	99 UNCLASSIFIED PROTEINS	NULL	Non-secretory protein	N_Evol	N_Evol	N_Evol		0
1nc600_030	NCU00501	NCU00501	NCU00501	conserved hypothetical protein	99 UNCLASSIFIED PROTEINS	;CBF;	Non-secretory protein	E_Evol	E_Evol	A_Evol		0
1nc600_040	NCU00502	NCU00502	NCU00502	probable H+-transporting two-sector ATPase chain b precursor	02 ENERGY_02.13 respiration_20 CELLULAR TRANSPORT, TRANSPORT FACILITIES AND TRANSPORT ROUTES_20.03 transport facilities_20.03.22 transport ATPases_34 INTERACTION WITH THE ENVIRONMENT_34.01 homeostasis_34.01.01 homeostasis of cations_34.01.01.03 homeostasis of protons_70 SUBCELLULAR LOCALIZATION_70.16 mitochondrion	;Mt_ATP-synt_B;ATP-synt_B;	Signal peptide	E_Evol	B_Evol	B_Evol		0
1nc600_050	NCU00503	NCU00503	NCU00503	hypothetical protein	99 UNCLASSIFIED PROTEINS	NULL	Non-secretory protein	B_Evol	F_Evol	F_Evol		0
1nc600_060	NCU00504	NCU00504	NCU00504	conserved hypothetical protein	99 UNCLASSIFIED PROTEINS	;MTS;	Non-secretory protein	E_Evol	E_Evol	E_Evol		0
1nc600_070	NCU00505	NCU00505	NCU00505	probable small nuclear ribonucleoprotein	11 TRANSCRIPTION_11.04 RNA processing_11.04.03 mRNA processing (splicing, 5'-, 3'-end processing)_11.04.03.01 splicing_70 SUBCELLULAR LOCALIZATION_70.10 nucleus	;LSM;	Non-secretory protein	E_Evol	E_Evol	E_Evol		0
1nc600_080	NCU00506	NCU00506	NCU00506	related to PKR1 protein	20 CELLULAR TRANSPORT, TRANSPORT FACILITIES AND TRANSPORT ROUTES_20.01 transported compounds (substrates)_20.01.27 drug/toxin transport	;Pkr1;	Signal anchor	F_Evol	F_Evol	F_Evol		0
1nc600_090	NCU00509	NCU00509	NCU00509	putative protein	99 UNCLASSIFIED PROTEINS	;Extensin_2;	Non-secretory protein	F_Evol	F_Evol	F_Evol		0
1nc600_100	NCU00510	NCU00510	NCU00510	hypothetical protein	99 UNCLASSIFIED PROTEINS	NULL	Non-secretory protein	N_Evol	N_Evol	N_Evol		0
1nc600_120	NCU00513	NCU00513	NCU00513	conserved hypothetical protein	99 UNCLASSIFIED PROTEINS	;APH;DUF227;Choline_kinase;	Non-secretory protein	E_Evol	E_Evol	E_Evol		0
1nc600_130	NCU00515	NCU00515	NCU00515	putative protein	99 UNCLASSIFIED PROTEINS	;Extensin_2;	Non-secretory protein	N_Evol	N_Evol	N_Evol		0
1nc600_140	NCU00516	NCU00516	NCU00516	hypothetical protein	99 UNCLASSIFIED PROTEINS	NULL	Non-secretory protein	F_Evol	N_Evol	N_Evol		0
1nc600_150	NCU00517	NCU00517	NCU00517	related to cell cycle checkpoint protein RAD17	10 CELL CYCLE AND DNA PROCESSING_10.03 cell cycle_10.03.01 mitotic cell cycle and cell cycle control_10.03.01.03 cell cycle checkpoints (checkpoints of morphogenesis, DNA-damage,-replication, mitotic phase and spindle)	;Rad17;Viral_helicase1;MFMR;	Non-secretory protein	F_Evol	F_Evol	F_Evol		0
1nc596_010	NCU00519	NCU00519	NCU00519	probable D-ribulose-5-phosphate 3-epimerase (fragment)	01 METABOLISM_01.05 C-compound and carbohydrate metabolism_02 ENERGY_02.07 pentose-phosphate pathway_70 SUBCELLULAR LOCALIZATION_70.03 cytoplasm	;Ribul_P_3_epim;	Non-secretory protein	E_Evol	E_Evol	E_Evol		0
1nc596_020	NCU00520	NCU00520	NCU00520	hypothetical protein	99 UNCLASSIFIED PROTEINS	;2OG-FeII_Oxy;	Non-secretory protein	E_Evol	B_Evol	B_Evol		0
1nc596_030	NCU00521	NCU00521	NCU00521	hypothetical protein	99 UNCLASSIFIED PROTEINS	NULL	Non-secretory protein	F_Evol	F_Evol	F_Evol		0
1nc596_040	NCU00522	NCU00522	NCU00522	related to putative cystathionine beta-lyase	01 METABOLISM_01.01 amino acid metabolism_01.01.06 metabolism of the aspartate family_01.01.06.05 metabolism of methionine	;Cys_Met_Meta_PP;Pyridoxal_deC;Aminotran_5;Aminotran_1_2;	Non-secretory protein	E_Evol	E_Evol	E_Evol		0
1nc596_060	NCU00523	NCU00523	NCU00523	related to NAD-dependent histone deacetylase	10 CELL CYCLE AND DNA PROCESSING_10.01 DNA processing_10.01.09 DNA restriction or modification_11 TRANSCRIPTION_11.02 RNA synthesis_11.02.03 mRNA synthesis_11.02.03.04 transcriptional control	;SIR2;	Non-secretory protein	E_Evol	E_Evol	E_Evol		0
1nc594_010	NCU00525	NCU00525	NCU00525	hypothetical protein	99 UNCLASSIFIED PROTEINS	NULL	Non-secretory protein	N_Evol	N_Evol	N_Evol		0
1nc594_020	NCU00526	NCU00526	NCU00526	related to laccase precursor	01 METABOLISM_01.05 C-compound and carbohydrate metabolism_01.05.11 aromate metabolism_01.05.11.07 aromate catabolism_01.05.11.07.01 aerobic aromate catabolism_01.25 extracellular metabolism_01.25.09 extracellular lignin degradation	;Cu-oxidase_3;Cu-oxidase;Cu-oxidase_2;	Non-secretory protein	E_Evol	E_Evol	F_Evol		0
1nc594_030	NCU00527	NCU00527	NCU00527	conserved hypothetical protein	99 UNCLASSIFIED PROTEINS	NULL	Non-secretory protein	E_Evol	E_Evol	B_Evol		0
1nc594_040	NCU00528	NCU00528	NCU00528	conserved hypothetical protein	99 UNCLASSIFIED PROTEINS	;FHA;TPR_MLP1_2;DUF593;Prp19;	Non-secretory protein	B_Evol	F_Evol	F_Evol		0
1nc594_050	NCU00529	NCU00529	NCU00529	hypothetical protein	99 UNCLASSIFIED PROTEINS	NULL	Non-secretory protein	N_Evol	N_Evol	N_Evol		0
1nc594_060	NCU00530	NCU00530	NCU00530	hypothetical protein	99 UNCLASSIFIED PROTEINS	NULL	Non-secretory protein	N_Evol	N_Evol	N_Evol		0
1nc594_070	NCU00533	NCU00533	NCU00533	hypothetical protein	99 UNCLASSIFIED PROTEINS	NULL	Non-secretory protein	N_Evol	N_Evol	N_Evol		0
1nc594_080	NCU00534	NCU00534	NCU00534	hypothetical protein	99 UNCLASSIFIED PROTEINS	NULL	Non-secretory protein	N_Evol	N_Evol	N_Evol		0
1nc594_090	NCU00535	NCU00535	NCU00535	conserved hypothetical protein	99 UNCLASSIFIED PROTEINS	;tRNA_SAD;	Non-secretory protein	O_Evol	O_Evol	F_Evol		0
1nc594_100	NCU00536	NCU00536	NCU00536	probable serine O-acetyltransferase	01 METABOLISM_01.01 amino acid metabolism_01.01.09 metabolism of the cysteine - aromatic group_01.01.09.03 metabolism of cysteine_01.01.09.03.01 biosynthesis of cysteine	;Abhydrolase_1;SRP_SPB;	Non-secretory protein	E_Evol	E_Evol	E_Evol		0
1nc594_110	NCU00537	NCU00537	NCU00537	putative protein	99 UNCLASSIFIED PROTEINS	NULL	Non-secretory protein	B_Evol	F_Evol	F_Evol		0
1nc592_010	NCU00542	NCU00542	NCU00542	hypothetical protein	99 UNCLASSIFIED PROTEINS	;DUF914;UAA;TPT;DUF6;	Non-secretory protein	E_Evol	B_Evol	B_Evol		0
1nc590_010	NCU00545	NCU00545	NCU00545	putative protein	99 UNCLASSIFIED PROTEINS	;Cytadhesin_P30;Extensin_2;TP2;	Non-secretory protein	F_Evol	F_Evol	N_Evol		0
1nc590_050	NCU00549	NCU00549	NCU00549	related to glutathione transferase omega 1	01 METABOLISM_01.20 secondary metabolism_01.20.37 metabolism of peptide derived compounds_01.20.37.01 metabolism of thioredoxin, glutaredoxin, glutathion	;GST_N;GST_C;	Non-secretory protein	E_Evol	E_Evol	B_Evol		0
1nc590_060	NCU00550	NCU00550	NCU00550	hypothetical protein	99 UNCLASSIFIED PROTEINS	;Extensin_2;RCSD;	Non-secretory protein	F_Evol	F_Evol	F_Evol		0
1nc590_070	NCU00551	NCU00551	NCU00551	related to myosin II	10 CELL CYCLE AND DNA PROCESSING_10.03 cell cycle_10.03.03 cytokinesis (cell division) /septum formation and hydrolysis	;Myosin_N;Myosin_head;DUF869;LMP;Pox_A_type_inc;Strep_SA_rep;M;Strep_SA_rep;M;Pox_A_type_inc;M;M;TPR_MLP1_2;Rab5-bind;Strep_SA_rep;M;SART-1;Myosin_tail_1;Pox_A_type_inc;DUF593;Rho_Binding;Pox_A_type_inc;HR1;Strep_SA_rep;PspA_IM30;M;SF-assemblin;Microtub_assoc;Not3;M;Strep_SA_rep;M;Filament;Strep_SA_rep;Pox_A_type_inc;Cortex-I_coil;Erp_C;M;Strep_SA_rep;PLC-beta_C;Pox_A_type_inc;M;Pox_A_type_inc;Po…	Non-secretory protein	E_Evol	E_Evol	B_Evol		0
1nc590_080	NCU00552	NCU00552	NCU00552	phytoene dehydrogenase AL-1 (carotenoid biosynthesis protein al-1)	01 METABOLISM_01.06 lipid, fatty acid and isoprenoid metabolism_01.06.06 isoprenoid metabolism_01.06.06.13 tetraterpenes (carotinoids) metabolism	;DAO;Amino_oxidase;	Non-secretory protein	E_Evol	E_Evol	E_Evol		0
1nc590_090	NCU00553	NCU00553	NCU00553	related to GTPase-activating protein beta-chimerin	30 CELLULAR COMMUNICATION/SIGNAL TRANSDUCTION MECHANISM_30.01 cellular signalling_30.01.05 enzyme mediated signal transduction_30.01.05.05 G-protein mediated signal transduction	;FCH;OmpH;DUF1690;Extensin_2;RhoGAP;	Non-secretory protein	B_Evol	B_Evol	F_Evol		0
1nc590_100	NCU00554	NCU00554	NCU00554	probable aspartate-semialdehyde dehydrogenase	01 METABOLISM_01.01 amino acid metabolism_01.01.06 metabolism of the aspartate family_01.01.06.06 metabolism of lysine_01.01.06.06.01 biosynthesis of lysine	;DapB_N;GFO_IDH_MocA;F420_oxidored;Semialdhyde_dh;Semialdhyde_dhC;	Non-secretory protein	E_Evol	E_Evol	E_Evol		0
1nc590_120	NCU00556	NCU00556	NCU00556	related to WHI3 protein, involved in regulation of cell size	40 CELL FATE_40.01 cell growth / morphogenesis_43 CELL TYPE DIFFERENTIATION_43.01 fungal/microorganismic cell type differentiation_43.01.03 fungal and other eukaryotic cell type differentiation_43.01.03.05 budding, cell polarity and filament formation	;RRM_1;	Non-secretory protein	A_Evol	F_Evol	F_Evol		0
1nc590_130	NCU00557	NCU00557	NCU00557	hypothetical protein	99 UNCLASSIFIED PROTEINS	NULL	Non-secretory protein	N_Evol	N_Evol	N_Evol		0
1nc590_140	NCU00558	NCU00558	NCU00558	putative protein	99 UNCLASSIFIED PROTEINS	;Zn_clus;	Non-secretory protein	F_Evol	F_Evol	F_Evol		0
1nc590_150	NCU00559	NCU00559	NCU00559	hypothetical protein	99 UNCLASSIFIED PROTEINS	NULL	Non-secretory protein	F_Evol	F_Evol	N_Evol		0
1nc590_160	NCU00560	NCU00560	NCU00560	related to WD-repeat protein CRB3	10 CELL CYCLE AND DNA PROCESSING_10.03 cell cycle_10.03.01 mitotic cell cycle and cell cycle control_10.03.01.01 mitotic cell cycle_10.03.01.01.03 G1/S transition of mitotic cell cycle	;WD40;WD40;WD40;WD40;WD40;	Non-secretory protein	F_Evol	F_Evol	F_Evol		0
1nc590_170	NCU00561	NCU00561	NCU00561	hypothetical protein	99 UNCLASSIFIED PROTEINS	NULL	Non-secretory protein	F_Evol	F_Evol	F_Evol		0
1nc590_180	NCU00562	NCU00562	NCU00562	hypothetical protein	99 UNCLASSIFIED PROTEINS	;Birna_VP5;	Non-secretory protein	F_Evol	F_Evol	F_Evol		0
1nc590_190	NCU00563	NCU00563	NCU00563	hypothetical protein	99 UNCLASSIFIED PROTEINS	NULL	Non-secretory protein	F_Evol	F_Evol	F_Evol		0
1nc590_200	NCU00564	NCU00564	NCU00564	probable ribosomal protein S14 precursor, mitochondrial	12 PROTEIN SYNTHESIS_12.01 ribosome biogenesis_12.01.01 ribosomal proteins_70 SUBCELLULAR LOCALIZATION_70.16 mitochondrion	;Ribosomal_S14;	Non-secretory protein	E_Evol	E_Evol	E_Evol		0
1nc590_210	NCU00565	NCU00565	NCU00565	probable lipoic acid synthase precursor	01 METABOLISM_01.07 metabolism of vitamins, cofactors, and prosthetic groups_01.07.01 biosynthesis of vitamins, cofactors, and prosthetic groups_70 SUBCELLULAR LOCALIZATION_70.16 mitochondrion	;Radical_SAM;	Non-secretory protein	E_Evol	E_Evol	E_Evol		0
1nc590_220	NCU00566	NCU00566	NCU00566	probable synaptobrevin (v-SNARE) homolog	14 PROTEIN FATE (folding, modification, destination)_14.04 protein targeting, sorting and translocation_20 CELLULAR TRANSPORT, TRANSPORT FACILITIES AND TRANSPORT ROUTES_20.09 transport routes_20.09.07 vesicular transport (Golgi network, etc.)_70 SUBCELLULAR LOCALIZATION_70.09 intracellular transport vesicles	;Synaptobrevin;	Non-secretory protein	E_Evol	E_Evol	E_Evol		0
1nc590_230	NCU00567	NCU00567	NCU00567	acetylglutamate kinase/N-acetyl-gamma-glutamyl-phosphate reductase precursor (ARG-6) ARG-6	01 METABOLISM_01.01 amino acid metabolism_01.01.03 assimilation of ammonia, metabolism of the glutamate group_01.01.03.05 metabolism of arginine_01.01.03.05.01 biosynthesis of arginine_70 SUBCELLULAR LOCALIZATION_70.16 mitochondrion	;AA_kinase;E2_bind;Neugrin;DUF619;DapB_N;Semialdhyde_dh;Semialdhyde_dhC;	Non-secretory protein	B_Evol	B_Evol	B_Evol		0
1nc590_240	NCU00568	NCU00568	NCU00568	conserved hypothetical protein	99 UNCLASSIFIED PROTEINS	;Peptidase_A22B;DUF1119;	Non-secretory protein	B_Evol	F_Evol	F_Evol		0
b22i21_390	NCU00569	NCU00569	NCU00569	related to SOH1 protein	10 CELL CYCLE AND DNA PROCESSING_10.01 DNA processing_10.01.05 DNA recombination and DNA repair_11 TRANSCRIPTION	;SOH1;	Non-secretory protein	E_Evol	E_Evol	B_Evol		0
b22i21_380	NCU00570	NCU00570	NCU00570	probable DNA-directed RNA polymerase III subunit C11	11 TRANSCRIPTION_11.02 RNA synthesis_11.02.02 tRNA synthesis_70 SUBCELLULAR LOCALIZATION_70.10 nucleus	;RNA_POL_M_15KD;TFIIS_C;	Signal peptide	E_Evol	E_Evol	E_Evol		0
b22i21_370	NCU00571	NCU00571	NCU00571	conserved hypothetical protein	99 UNCLASSIFIED PROTEINS	;Ank;Ank;	Non-secretory protein	E_Evol	B_Evol	F_Evol		0
b22i21_360	NCU00572	NCU00572	NCU00572	related to pathogenesis-related protein PR5K (thaumatin family)	32 CELL RESCUE, DEFENSE AND VIRULENCE_32.05 disease, virulence and defense	;Thaumatin;	Non-secretory protein	O_Evol	F_Evol	F_Evol		0
b22i21_340	NCU00574	NCU00574	NCU00574	hypothetical protein	99 UNCLASSIFIED PROTEINS	NULL	Non-secretory protein	N_Evol	N_Evol	N_Evol		0
b22i21_330	NCU00575	NCU00575	NCU00575	probable glucokinase	01 METABOLISM_01.05 C-compound and carbohydrate metabolism_02 ENERGY_02.01 glycolysis and gluconeogenesis_70 SUBCELLULAR LOCALIZATION_70.03 cytoplasm	;Hexokinase_1;Hexokinase_2;CNTF;	Non-secretory protein	E_Evol	E_Evol	E_Evol		0
b22i21_320	NCU00576	NCU00576	NCU00576	putative protein	99 UNCLASSIFIED PROTEINS	;Acetyltransf_1;SSDP;	Non-secretory protein	F_Evol	F_Evol	F_Evol		0
b22i21_310	NCU00577	NCU00577	NCU00577	putative protein	99 UNCLASSIFIED PROTEINS	;Hc1;	Non-secretory protein	F_Evol	F_Evol	F_Evol		0
b22i21_290	NCU00579	NCU00579	NCU00579	related to oxysterol-binding protein	01 METABOLISM_01.06 lipid, fatty acid and isoprenoid metabolism	;TolA;Ank;Ank;Ank;PH;MAP7;Oxysterol_BP;	Non-secretory protein	B_Evol	B_Evol	B_Evol		0
b22i21_280	NCU00580	NCU00580	NCU00580	related to acyl-CoA thiolesterase	01 METABOLISM_01.06 lipid, fatty acid and isoprenoid metabolism	;Acyl_CoA_thio;Acyl_CoA_thio;	Non-secretory protein	E_Evol	E_Evol	O_Evol		0
b22i21_270	NCU00581	NCU00581	NCU00581	related to null pigmentation protein NpgA	98 CLASSIFICATION NOT YET CLEAR-CUT	;ACPS;	Non-secretory protein	F_Evol	F_Evol	F_Evol		0
b22i21_260	NCU00582	NCU00582	NCU00582	related to deoxyribodipyrimidine photo-lyase	10 CELL CYCLE AND DNA PROCESSING_10.01 DNA processing_10.01.05 DNA recombination and DNA repair_10.01.05.01 DNA repair	;DNA_photolyase;FAD_binding_7;	Non-secretory protein	E_Evol	B_Evol	F_Evol		0
b22i21_250	NCU00583	NCU00583	NCU00583	hypothetical protein	99 UNCLASSIFIED PROTEINS	NULL	Non-secretory protein	N_Evol	N_Evol	N_Evol		0
b22i21_240	NCU00584	NCU00584	NCU00584	conserved hypothetical protein	99 UNCLASSIFIED PROTEINS	;4HBT;	Non-secretory protein	B_Evol	F_Evol	F_Evol		0
b22i21_220	NCU00586	NCU00586	NCU00586	conserved hypothetical protein	99 UNCLASSIFIED PROTEINS	;Clc-like;SUR7;PMP22_Claudin;	Signal peptide	F_Evol	F_Evol	F_Evol		0
b22i21_210	NCU00587	NCU00587	NCU00587	related to tyrosine protein kinase of the MAP kinase kinase family	30 CELLULAR COMMUNICATION/SIGNAL TRANSDUCTION MECHANISM_30.01 cellular signalling_30.01.05 enzyme mediated signal transduction_30.01.05.01 protein kinase_30.01.05.01.03 MAPKKK cascade_34 INTERACTION WITH THE ENVIRONMENT_34.11 cellular sensing and response to external stimulus_34.11.03 chemoperception and response_34.11.03.13 osmosensing and response	;Pkinase;Pkinase_Tyr;	Non-secretory protein	E_Evol	E_Evol	B_Evol		0
b22i21_190	NCU00590	NCU00590	NCU00590	conserved hypothetical protein	99 UNCLASSIFIED PROTEINS	;Pyridox_oxidase;	Non-secretory protein	F_Evol	F_Evol	F_Evol		0
b22i21_180	NCU00591	NCU00591	NCU00591	probable methylcrotonoyl-CoA carboxylase biotin carboxylase chain	01 METABOLISM_01.01 amino acid metabolism_01.01.11 metabolism of the pyruvate family (alanine, isoleucine, leucine, valine) and D-alanine_01.01.11.04 metabolism of leucine_01.01.11.04.02 degradation of leucine_16 PROTEIN WITH BINDING FUNCTION OR COFACTOR REQUIREMENT (structural or catalytic)_16.21 complex cofactor/cosubstrate/vitamine binding_16.21.15 biotin binding	;CPSase_L_chain;ATP-grasp_3;RimK;GARS_A;ATP-grasp;CPSase_L_D2;Dala_Dala_lig_C;SUI1;Biotin_carb_C;Biotin_lipoyl;	Non-secretory protein	E_Evol	E_Evol	E_Evol		0
b22i21_170	NCU00592	NCU00592	NCU00592	conserved hypothetical protein	99 UNCLASSIFIED PROTEINS	;Cwf_Cwc_15;DUF1777;	Non-secretory protein	E_Evol	E_Evol	B_Evol		0
b22i21_160	NCU00593	NCU00593	NCU00593	probable COP9 complex subunit 2	10 CELL CYCLE AND DNA PROCESSING_10.03 cell cycle_10.03.01 mitotic cell cycle and cell cycle control_30 CELLULAR COMMUNICATION/SIGNAL TRANSDUCTION MECHANISM_30.01 cellular signalling	;PCI;	Non-secretory protein	E_Evol	E_Evol	E_Evol		0
b22i21_150	NCU00594	NCU00594	NCU00594	hypothetical protein	99 UNCLASSIFIED PROTEINS	NULL	Non-secretory protein	N_Evol	N_Evol	N_Evol		0
b22i21_140	NCU00595	NCU00595	NCU00595	conserved hypothetical protein	99 UNCLASSIFIED PROTEINS	;SSDP;Extensin_2;	Non-secretory protein	F_Evol	F_Evol	F_Evol		0
b22i21_130	NCU00596	NCU00596	NCU00596	related to lipoate--protein ligase B	01 METABOLISM_01.06 lipid, fatty acid and isoprenoid metabolism_01.06.05 fatty acid metabolism_16 PROTEIN WITH BINDING FUNCTION OR COFACTOR REQUIREMENT (structural or catalytic)_16.13 C-compound binding_16.13.03 fatty acid binding (e.g. acyl-carrier protein)	;BPL_LipA_LipB;	Non-secretory protein	F_Evol	F_Evol	F_Evol		0
b22i21_120	NCU00597	NCU00597	NCU00597	conserved hypothetical protein	99 UNCLASSIFIED PROTEINS	;DUF171;	Non-secretory protein	E_Evol	O_Evol	O_Evol		0
b22i21_100	NCU00599	NCU00599	NCU00599	conserved hypothetical protein	99 UNCLASSIFIED PROTEINS	;Pinin_SDK_memA;Rsm22;Methyltransf_12;	Non-secretory protein	F_Evol	F_Evol	F_Evol		0
b22i21_090	NCU00600	NCU00600	NCU00600	probable rho3 protein	16 PROTEIN WITH BINDING FUNCTION OR COFACTOR REQUIREMENT (structural or catalytic)_16.19 nucleotide/nucleoside/nucleobase binding_16.19.05 GTP binding_20 CELLULAR TRANSPORT, TRANSPORT FACILITIES AND TRANSPORT ROUTES_20.09 transport routes_20.09.16 cellular export and secretion_30 CELLULAR COMMUNICATION/SIGNAL TRANSDUCTION MECHANISM_30.01 cellular signalling_30.01.05 enzyme mediated signal transdu…	;Arf;MMR_HSR1;Miro;Ras;	Non-secretory protein	E_Evol	E_Evol	E_Evol		0
b22i21_070	NCU00603	NCU00603	NCU00603	hypothetical protein	99 UNCLASSIFIED PROTEINS	NULL	Non-secretory protein	N_Evol	N_Evol	N_Evol		0
b22i21_050	NCU00605	NCU00605	NCU00605	conserved hypothetical protein	99 UNCLASSIFIED PROTEINS	;ThiF;Pyr_redox_2;DNA_topoisoIV;	Non-secretory protein	E_Evol	E_Evol	E_Evol		0
b22i21_040	NCU00606	NCU00606	NCU00606	related to 3-ketoacyl-acyl carrier protein reductase	01 METABOLISM_01.06 lipid, fatty acid and isoprenoid metabolism_01.06.05 fatty acid metabolism	;ADH_zinc_N;adh_short;KR;Epimerase;3Beta_HSD;NAD_binding_4;	Non-secretory protein	E_Evol	E_Evol	O_Evol		0
b22i21_030	NCU00607	NCU00607	NCU00607	putative protein	99 UNCLASSIFIED PROTEINS	NULL	Signal peptide	F_Evol	F_Evol	F_Evol		0
b22i21_020	NCU00608	NCU00608	NCU00608	related to long-chain fatty-acid-CoA ligase	01 METABOLISM_01.06 lipid, fatty acid and isoprenoid metabolism	;AMP-binding;	Non-secretory protein	E_Evol	E_Evol	E_Evol		0
1nc580_020	NCU00609	NCU00609	NCU00609	related to mannosyltransferase	01 METABOLISM_01.05 C-compound and carbohydrate metabolism_14 PROTEIN FATE (folding, modification, destination)_14.07 protein modification_14.07.02 modification with sugar residues (e.g. glycosylation, deglycosylation)	;Gly_transf_sug;	Signal peptide	A_Evol	A_Evol	A_Evol		0
1nc580_030	NCU00611	NCU00611	NCU00611	putative protein	99 UNCLASSIFIED PROTEINS	NULL	Non-secretory protein	F_Evol	F_Evol	F_Evol		0
1nc580_040	NCU00614	NCU00614	NCU00614	conserved hypothetical protein	99 UNCLASSIFIED PROTEINS	;SGL;DUF1464;DUF1620;	Signal peptide	E_Evol	F_Evol	F_Evol		0
1nc580_070	NCU00617	NCU00617	NCU00617	related to phosducin homolog, likely to be involved in regulation of pheromone response	34 INTERACTION WITH THE ENVIRONMENT_34.11 cellular sensing and response to external stimulus_34.11.03 chemoperception and response_34.11.03.07 pheromone response, mating-type determination, sex-specific proteins	;Phosducin;	Non-secretory protein	E_Evol	E_Evol	A_Evol		0
1nc580_080	NCU00618	NCU00618	NCU00618	probable 40S ribosomal protein S27-2	12 PROTEIN SYNTHESIS_12.01 ribosome biogenesis_12.01.01 ribosomal proteins_70 SUBCELLULAR LOCALIZATION_70.03 cytoplasm	;Ribosomal_S27e;	Non-secretory protein	E_Evol	E_Evol	E_Evol		0
1nc580_090	NCU00619	NCU00619	NCU00619	hypothetical protein	99 UNCLASSIFIED PROTEINS	;RNR_inhib;	Non-secretory protein	F_Evol	F_Evol	F_Evol		0
1nc580_100	NCU00620	NCU00620	NCU00620	hypothetical protein	99 UNCLASSIFIED PROTEINS	NULL	Non-secretory protein	F_Evol	F_Evol	F_Evol		0
1nc580_110	NCU00621	NCU00621	NCU00621	related to raptor, a binding partner of target of rapamycin (TOR)	18 REGULATION OF METABOLISM AND PROTEIN FUNCTION_18.02 regulation of protein activity_18.02.01 enzymatic activity regulation / enzyme regulator_18.02.01.01 enzyme activator_40 CELL FATE_40.01 cell growth / morphogenesis	;HEAT;HEAT;WD40;WD40;WD40;WD40;WD40;WD40;	Non-secretory protein	E_Evol	E_Evol	E_Evol		0
1nc580_120	NCU00622	NCU00622	NCU00622	related to cell polarity protein tea1p	40 CELL FATE_40.01 cell growth / morphogenesis_40.01.03 directional cell growth (morphogenesis)_43 CELL TYPE DIFFERENTIATION_43.01 fungal/microorganismic cell type differentiation_43.01.03 fungal and other eukaryotic cell type differentiation_43.01.03.05 budding, cell polarity and filament formation	;Kelch_2;Kelch_1;Kelch_2;Kelch_1;Kelch_2;Kelch_1;Extensin_2;Lipase_chap;Myosin_tail_1;DUF745;Prosystemin;Isy1;DUF827;DUF869;SH3BP5;Rho_Binding;Filament;BRE1;TPR_MLP1_2;Sds3;Apolipoprotein;Cauli_DNA-bind;Prefoldin_2;Remorin_C;	Non-secretory protein	B_Evol	B_Evol	F_Evol		0
1nc580_130	NCU00623	NCU00623	NCU00623	hypothetical protein	99 UNCLASSIFIED PROTEINS	NULL	Non-secretory protein	F_Evol	F_Evol	F_Evol		0
1nc580_140	NCU00624	NCU00624	NCU00624	related to Slh1p interacting factor	20 CELLULAR TRANSPORT, TRANSPORT FACILITIES AND TRANSPORT ROUTES_20.09 transport routes_20.09.07 vesicular transport (Golgi network, etc.)	;YIF1;Yip1;	Non-secretory protein	E_Evol	E_Evol	B_Evol		0
1nc580_180	NCU00627	NCU00627	NCU00627	putative protein	99 UNCLASSIFIED PROTEINS	;DUF591;	Non-secretory protein	F_Evol	F_Evol	F_Evol		0
1nc580_190	NCU00628	NCU00628	NCU00628	hypothetical protein	99 UNCLASSIFIED PROTEINS	NULL	Non-secretory protein	F_Evol	F_Evol	F_Evol		0
1nc580_200	NCU00629	NCU00629	NCU00629	probable 6-phosphofructokinase	01 METABOLISM_01.05 C-compound and carbohydrate metabolism_01.05.25 regulation of C-compound and carbohydrate metabolism_02 ENERGY_02.01 glycolysis and gluconeogenesis_02.01.03 regulation of glycolysis and gluconeogenesis_70 SUBCELLULAR LOCALIZATION_70.03 cytoplasm	;PFK;PFK;	Non-secretory protein	E_Evol	E_Evol	E_Evol		0
1nc580_210	NCU00630	NCU00630	NCU00630	hypothetical protein	99 UNCLASSIFIED PROTEINS	NULL	Signal peptide	F_Evol	F_Evol	F_Evol		0
1nc580_230	NCU00632	NCU00632	NCU00632	related to nucleotide diphosphatase	01 METABOLISM_01.03 nucleotide/nucleoside/nucleobase metabolism_01.03.01 purin nucleotide/nucleoside/nucleobase metabolism	;Sulfatase;Phosphodiest;Auxin_repressed;	Non-secretory protein	F_Evol	F_Evol	F_Evol		0
1nc580_240	NCU00633	NCU00633	NCU00633	hypothetical protein	99 UNCLASSIFIED PROTEINS	;Acetyltransf_1;	Non-secretory protein	B_Evol	F_Evol	F_Evol		0
1nc580_250	NCU00634	NCU00634	NCU00634	probable ribosomal protein L14.e.B, cytosolic	12 PROTEIN SYNTHESIS_12.01 ribosome biogenesis_12.01.01 ribosomal proteins_70 SUBCELLULAR LOCALIZATION_70.03 cytoplasm	;Ribosomal_L14e;	Non-secretory protein	E_Evol	E_Evol	E_Evol		0
1nc580_260	NCU00635	NCU00635	NCU00635	probable nascent polypeptide-associated complex alpha chain	11 TRANSCRIPTION_11.02 RNA synthesis_11.02.03 mRNA synthesis_11.02.03.04 transcriptional control_16 PROTEIN WITH BINDING FUNCTION OR COFACTOR REQUIREMENT (structural or catalytic)_16.01 protein binding_16.03 nucleic acid binding_16.03.01 DNA binding	;NAC;UBA;	Non-secretory protein	E_Evol	E_Evol	E_Evol		0
1nc580_270	NCU00636	NCU00636	NCU00636	probable F1Fo-ATP synthase subunit 7, mitochondrial	02 ENERGY_02.13 respiration_02.45 energy conversion and regeneration_02.45.15 energy generation (e.g. ATP synthase)_20 CELLULAR TRANSPORT, TRANSPORT FACILITIES AND TRANSPORT ROUTES_20.03 transport facilities_20.03.22 transport ATPases_34 INTERACTION WITH THE ENVIRONMENT_34.01 homeostasis_34.01.01 homeostasis of cations_34.01.01.03 homeostasis of protons_70 SUBCELLULAR LOCALIZATION_70.16 mitochond…	;Mt_ATP-synt_D;	Non-secretory protein	E_Evol	E_Evol	B_Evol		0
1nc580_280	NCU00638	NCU00638	NCU00638	hypothetical protein	99 UNCLASSIFIED PROTEINS	NULL	Non-secretory protein	F_Evol	F_Evol	F_Evol		0
1nc580_290	NCU00640	NCU00640	NCU00640	hypothetical protein	99 UNCLASSIFIED PROTEINS	NULL	Non-secretory protein	N_Evol	N_Evol	N_Evol		0
1nc580_300	NCU00641	NCU00641	NCU00641	conserved hypothetical protein	99 UNCLASSIFIED PROTEINS	NULL	Signal peptide	E_Evol	E_Evol	B_Evol		0
1nc580_310	NCU00642	NCU00642	NCU00642	probable beta-galactosidase	01 METABOLISM_01.05 C-compound and carbohydrate metabolism	;Glyco_hydro_35;Glyco_hydro_42;Glyco_hydro_2_N;	Signal peptide	E_Evol	E_Evol	B_Evol		0
1nc580_320	NCU00643	NCU00643	NCU00643	probable L-arabinitol 4-dehydrogenase	01 METABOLISM_01.05 C-compound and carbohydrate metabolism_70 SUBCELLULAR LOCALIZATION_70.03 cytoplasm	;ADH_N;ADH_zinc_N;Methyltransf_11;	Non-secretory protein	E_Evol	E_Evol	E_Evol		0
1nc580_330	NCU00644	NCU00644	NCU00644	related to F1F0-ATP synthase subunit G	02 ENERGY_02.13 respiration_02.45 energy conversion and regeneration_02.45.15 energy generation (e.g. ATP synthase)_20 CELLULAR TRANSPORT, TRANSPORT FACILITIES AND TRANSPORT ROUTES_20.03 transport facilities_20.03.22 transport ATPases_34 INTERACTION WITH THE ENVIRONMENT_34.01 homeostasis_34.01.01 homeostasis of cations_34.01.01.03 homeostasis of protons_70 SUBCELLULAR LOCALIZATION_70.16 mitochond…	;ATP-synt_G;	Non-secretory protein	B_Evol	B_Evol	F_Evol		0
1nc580_340	NCU00645	NCU00645	NCU00645	hypothetical protein	99 UNCLASSIFIED PROTEINS	NULL	Non-secretory protein	N_Evol	N_Evol	N_Evol		0
1nc580_370	NCU00648	NCU00648	NCU00648	related to cholin permease	20 CELLULAR TRANSPORT, TRANSPORT FACILITIES AND TRANSPORT ROUTES_20.01 transported compounds (substrates)_20.01.07 amino acid/amino acid derivatives transport_20.09 transport routes_20.09.18 cellular import_70 SUBCELLULAR LOCALIZATION_70.02 eukaryotic plasma membrane / membrane attached	;AA_permease;DUF81;DUF456;	Non-secretory protein	E_Evol	F_Evol	F_Evol		0
1nc580_380	NCU00649	NCU00649	NCU00649	related to nicotinate phosphoribosyltransferase	01 METABOLISM_01.07 metabolism of vitamins, cofactors, and prosthetic groups_01.07.01 biosynthesis of vitamins, cofactors, and prosthetic groups	;NAPRTase;	Non-secretory protein	E_Evol	E_Evol	B_Evol		0
1nc580_390	NCU00650	NCU00650	NCU00650	conserved hypothetical protein	99 UNCLASSIFIED PROTEINS	;WD40;WD40;WD40;PQQ;WD40;PQQ;WD40;WD40;WD40;WD40;	Non-secretory protein	B_Evol	F_Evol	F_Evol		0
1nc580_400	NCU00651	NCU00651	NCU00651	related to PNG1 - protein with de-N-glycosylation function (N-glycanase)	14 PROTEIN FATE (folding, modification, destination)_14.13 protein/peptide degradation_14.13.01 cytoplasmic and nuclear protein degradation_14.13.01.01 proteasomal degradation (ubiquitin/proteasomal pathway)_70 SUBCELLULAR LOCALIZATION_70.03 cytoplasm_70.10 nucleus	;Transglut_core;	Non-secretory protein	E_Evol	A_Evol	F_Evol		0
1nc580_410	NCU00652	NCU00652	NCU00652	hypothetical protein	99 UNCLASSIFIED PROTEINS	NULL	Non-secretory protein	F_Evol	N_Evol	N_Evol		0
1nc580_430	NCU00654	NCU00654	NCU00654	hypothetical protein	99 UNCLASSIFIED PROTEINS	NULL	Non-secretory protein	F_Evol	F_Evol	F_Evol		0
1nc580_440	NCU00655	NCU00655	NCU00655	related to 2,4-dienoyl-CoA reductase precursor	01 METABOLISM_01.06 lipid, fatty acid and isoprenoid metabolism	;ADH_N;ADH_zinc_N;PA_decarbox;	Non-secretory protein	E_Evol	E_Evol	O_Evol		0
1nc580_470	NCU00658	NCU00658	NCU00658	related to myosin heavy chain	20 CELLULAR TRANSPORT, TRANSPORT FACILITIES AND TRANSPORT ROUTES_20.09 transport routes_20.09.14 cytoskeleton-dependent transport_42 BIOGENESIS OF CELLULAR COMPONENTS_42.04 cytoskeleton/structural proteins	;HPC2;FH2;M;KID;ELK;M;KID;Pox_A_type_inc;M;KID;KID;DUF947;DUF593;M;ELK;Pox_A_type_inc;M;Apolipoprotein;Myosin_tail_1;Strep_SA_rep;Pox_A_type_inc;Pox_A_type_inc;Halo_GVPC;Strep_SA_rep;KID;TPR_MLP1_2;DUF848;ELK;HalX;Strep_SA_rep;Pox_A_type_inc;LTXXQ;LPP;Strep_SA_rep;KID;DUF1351;IucA_IucC;DHC_N1;OEP;M;Pox_A_type_inc;KID;Strep_SA_rep;KID;LTXXQ;LPP;Ribosomal_L29;DUF1409;LTXXQ;Strep_SA_rep;Pox_A_type_i…	Non-secretory protein	N_Evol	N_Evol	N_Evol	6nc140_050	0
1nc580_480	NCU00659	NCU00659	NCU00659	hypothetical protein	99 UNCLASSIFIED PROTEINS	;Lactamase_B;	Non-secretory protein	E_Evol	B_Evol	F_Evol		0
1nc580_490	NCU00660	NCU00660	NCU00660	related to glutamyl-tRNA(Gln) amidotransferase subunit A	01 METABOLISM_01.02 nitrogen, sulfur and selenium metabolism_12 PROTEIN SYNTHESIS	;Amidase;	Non-secretory protein	E_Evol	E_Evol	E_Evol		0
1nc580_510	NCU00663	NCU00663	NCU00663	hypothetical protein	99 UNCLASSIFIED PROTEINS	NULL	Signal peptide	N_Evol	N_Evol	N_Evol		0
1nc580_520	NCU00664	NCU00664	NCU00664	related to pre-mRNA splicing factor	11 TRANSCRIPTION_11.04 RNA processing_11.04.03 mRNA processing (splicing, 5'-, 3'-end processing)_11.04.03.01 splicing	;Isy1;	Non-secretory protein	E_Evol	E_Evol	E_Evol		0
1nc580_530	NCU00665	NCU00665	NCU00665	conserved hypothetical protein	99 UNCLASSIFIED PROTEINS	;Metallophos;	Signal peptide	B_Evol	B_Evol	A_Evol		0
1nc580_540	NCU00666	NCU00666	NCU00666	hypothetical protein	99 UNCLASSIFIED PROTEINS	NULL	Non-secretory protein	N_Evol	N_Evol	N_Evol		0
1nc580_550	NCU00667	NCU00667	NCU00667	V-type ATPase subunit C` (VMA-11) VMA-11	20 CELLULAR TRANSPORT, TRANSPORT FACILITIES AND TRANSPORT ROUTES_20.03 transport facilities_20.03.22 transport ATPases_34 INTERACTION WITH THE ENVIRONMENT_34.01 homeostasis_34.01.01 homeostasis of cations_34.01.01.03 homeostasis of protons_70 SUBCELLULAR LOCALIZATION_70.25 vacuole or lysosome	;ATP-synt_C;ATP-synt_C;	Non-secretory protein	E_Evol	E_Evol	E_Evol		0
1nc580_570	NCU00669	NCU00669	NCU00669	related to oligosaccharyltransferase 48K subunit	01 METABOLISM_01.05 C-compound and carbohydrate metabolism_14 PROTEIN FATE (folding, modification, destination)_14.07 protein modification_14.07.02 modification with sugar residues (e.g. glycosylation, deglycosylation)	;DDOST_48kD;	Signal peptide	E_Evol	E_Evol	B_Evol		0
1nc580_620	NCU00675	NCU00675	NCU00675	conserved hypothetical protein	99 UNCLASSIFIED PROTEINS	;UPF0089;Gag_spuma;	Non-secretory protein	F_Evol	F_Evol	F_Evol		0
1nc580_630	NCU00676	NCU00676	NCU00676	related to F1F0-ATPase complex assembly protein (ATP12 protein)	14 PROTEIN FATE (folding, modification, destination)_14.10 assembly of protein complexes_70 SUBCELLULAR LOCALIZATION_70.16 mitochondrion	;ATP12;BetR;	Non-secretory protein	F_Evol	F_Evol	F_Evol		0
1nc580_650	NCU00677	NCU00677	NCU00677	probable phenylacetyl-CoA ligase	01 METABOLISM_01.05 C-compound and carbohydrate metabolism_01.20 secondary metabolism_01.20.35 metabolism of secondary products derived from L-phenylalanine and L-tyrosine_01.20.35.01 metabolism of phenylpropanoids	;AMP-binding;	Non-secretory protein	E_Evol	E_Evol	E_Evol		0
1nc580_680	NCU00680	NCU00680	NCU00680	probable 2-methylcitrate dehydratase	01 METABOLISM_01.01 amino acid metabolism_01.01.06 metabolism of the aspartate family_01.01.06.06 metabolism of lysine_01.01.06.06.01 biosynthesis of lysine	;MmgE_PrpD;	Non-secretory protein	E_Evol	E_Evol	E_Evol		0
1nc580_690	NCU00681	NCU00681	NCU00681	related to Mac1p interacting protein (MIC1 protein)	11 TRANSCRIPTION_11.02 RNA synthesis_11.02.03 mRNA synthesis_11.02.03.04 transcriptional control_32 CELL RESCUE, DEFENSE AND VIRULENCE_32.01 stress response	;GRAM;TBC;efhand;efhand;	Non-secretory protein	B_Evol	A_Evol	F_Evol		0
1nc580_700	NCU00682	NCU00682	NCU00682	related to cAMP-dependent protein kinase catalytic subunit	14 PROTEIN FATE (folding, modification, destination)_14.07 protein modification_14.07.03 modification by phosphorylation, dephosphorylation, autophosphorylation_30 CELLULAR COMMUNICATION/SIGNAL TRANSDUCTION MECHANISM_30.01 cellular signalling_30.01.09 second messenger mediated signal transduction_30.01.09.07 cAMP/cGMP mediated signal transduction	;Pkinase;Pkinase_Tyr;APH;	Non-secretory protein	E_Evol	E_Evol	E_Evol		0
1nc580_710	NCU00684	NCU00684	NCU00684	putative protein	99 UNCLASSIFIED PROTEINS	;Exo_endo_phos;	Non-secretory protein	F_Evol	F_Evol	F_Evol		0
1nc580_730	NCU00687	NCU00687	NCU00687	conserved hypothetical protein	99 UNCLASSIFIED PROTEINS	;Pal1;	Non-secretory protein	B_Evol	F_Evol	F_Evol		0
1nc580_740	NCU00688	NCU00688	NCU00688	hypothetical protein	99 UNCLASSIFIED PROTEINS	;GRP;	Non-secretory protein	F_Evol	N_Evol	N_Evol		0
1nc580_750	NCU00689	NCU00689	NCU00689	hypothetical protein	99 UNCLASSIFIED PROTEINS	NULL	Non-secretory protein	F_Evol	F_Evol	N_Evol		0
1nc580_760	NCU00690	NCU00690	NCU00690	related to ribonuclease P chain POP1	11 TRANSCRIPTION_11.04 RNA processing_11.04.01 rRNA processing_11.04.02 tRNA processing_70 SUBCELLULAR LOCALIZATION_70.10 nucleus	;POP1;POPLD;	Non-secretory protein	E_Evol	F_Evol	F_Evol		0
1nc580_770	NCU00691	NCU00691	NCU00691	hypothetical protein	99 UNCLASSIFIED PROTEINS	;zf-C3HC4;Keratin_B2;IBR;zf-AN1;zf-CCHC;PLC-beta_C;	Non-secretory protein	F_Evol	F_Evol	F_Evol		0
1nc580_780	NCU00692	NCU00692	NCU00692	probable heat shock protein HSP70 (regulator protein involved in pleiotropic drug resistance)	18 REGULATION OF METABOLISM AND PROTEIN FUNCTION_18.02 regulation of protein activity_18.02.01 enzymatic activity regulation / enzyme regulator_18.02.01.01 enzyme activator_32 CELL RESCUE, DEFENSE AND VIRULENCE_32.01 stress response_32.05 disease, virulence and defense_32.05.01 resistance proteins	;HSP70;Actin;DUF407;Acyl-CoA_dh_2;Autophagy_N;Cenp-B_dimeris;	Non-secretory protein	E_Evol	B_Evol	B_Evol		0
1nc580_790	NCU00693	NCU00693	NCU00693	related to protein involved in ribosomal RNA processing, component of the exosome complex responsible for 3` end processing and degradation of many RNA species	11 TRANSCRIPTION_11.04 RNA processing_11.04.01 rRNA processing	NULL	Non-secretory protein	E_Evol	E_Evol	E_Evol		0
1nc580_800	NCU00694	NCU00694	NCU00694	putative protein	99 UNCLASSIFIED PROTEINS	;Extensin_2;Drf_FH1;PhnA_Zn_Ribbon;zf-C2H2;zf-C2H2;zf-C2H2;	Signal peptide	F_Evol	F_Evol	F_Evol		0
1nc580_810	NCU00695	NCU00695	NCU00695	putative protein	99 UNCLASSIFIED PROTEINS	;Fasciclin;Fasciclin;	Non-secretory protein	F_Evol	F_Evol	F_Evol		0
1nc580_820	NCU00696	NCU00696	NCU00696	conserved hypothetical protein	99 UNCLASSIFIED PROTEINS	;SH3_1;SH3_2;GRP;	Non-secretory protein	A_Evol	A_Evol	F_Evol		0
1nc580_830	NCU00697	NCU00697	NCU00697	hypothetical protein	99 UNCLASSIFIED PROTEINS	;Tymo_45kd_70kd;	Non-secretory protein	N_Evol	N_Evol	N_Evol		0
1nc570_010	NCU00698	NCU00698	NCU00698	hypothetical protein	99 UNCLASSIFIED PROTEINS	NULL	Non-secretory protein	N_Evol	N_Evol	N_Evol		0
1nc570_030	NCU00700	NCU00700	NCU00700	related to integral membrane protein	32 CELL RESCUE, DEFENSE AND VIRULENCE_32.05 disease, virulence and defense_70 SUBCELLULAR LOCALIZATION_70.02 eukaryotic plasma membrane / membrane attached	;DUF1109;Serpentine_r_xa;	Non-secretory protein	F_Evol	F_Evol	F_Evol		0
1nc570_040	NCU00701	NCU00701	NCU00701	probable lysozyme	01 METABOLISM_01.05 C-compound and carbohydrate metabolism_01.05.09 aminosaccharide metabolism_01.05.09.07 aminosaccharide catabolism_32 CELL RESCUE, DEFENSE AND VIRULENCE_32.05 disease, virulence and defense_32.05.03 defense related proteins_42 BIOGENESIS OF CELLULAR COMPONENTS_42.27 extracellular / secretion proteins	;Glyco_hydro_25;	Signal peptide	E_Evol	E_Evol	E_Evol		0
1nc570_050	NCU00704	NCU00704	NCU00704	conserved hypothetical protein	99 UNCLASSIFIED PROTEINS	NULL	Signal peptide	E_Evol	B_Evol	F_Evol		0
1nc570_070	NCU00706	NCU00706	NCU00706	probable 60S ribosomal protein L44	12 PROTEIN SYNTHESIS_12.01 ribosome biogenesis_12.01.01 ribosomal proteins_70 SUBCELLULAR LOCALIZATION_70.03 cytoplasm	;Ribosomal_L44;	Non-secretory protein	E_Evol	E_Evol	E_Evol		0
1nc570_080	NCU00707	NCU00707	NCU00707	related to single-stranded DNA binding protein	16 PROTEIN WITH BINDING FUNCTION OR COFACTOR REQUIREMENT (structural or catalytic)_16.03 nucleic acid binding_16.03.01 DNA binding_98 CLASSIFICATION NOT YET CLEAR-CUT	;RRM_1;RRM_1;	Non-secretory protein	F_Evol	F_Evol	F_Evol		0
1nc570_090	NCU00708	NCU00708	NCU00708	hypothetical protein	99 UNCLASSIFIED PROTEINS	NULL	Signal peptide	F_Evol	N_Evol	N_Evol		0
1nc570_110	NCU00710	NCU00710	NCU00710	probable acetylxylan esterase	01 METABOLISM_01.05 C-compound and carbohydrate metabolism_01.25 extracellular metabolism_01.25.07 extracellular ester compound degradation	;Esterase;Abhydrolase_2;Abhydrolase_3;Peptidase_S9;Caudal_act;CBM_1;	Signal peptide	E_Evol	B_Evol	B_Evol		0
1nc570_120	NCU00711	NCU00711	NCU00711	related to DHA14-like major facilitator efflux transporter (MFS transporter)	20 CELLULAR TRANSPORT, TRANSPORT FACILITIES AND TRANSPORT ROUTES_20.01 transported compounds (substrates)_20.01.27 drug/toxin transport_20.09 transport routes_20.09.16 cellular export and secretion_32 CELL RESCUE, DEFENSE AND VIRULENCE_32.05 disease, virulence and defense_32.05.01 resistance proteins_32.07 detoxification_32.07.05 detoxification by export	;Herpes_LMP2;TRI12;Sugar_tr;MFS_1;C4dic_mal_tran;Cytochrom_B561;AmoA;CTP_transf_1;MASE1;	Non-secretory protein	E_Evol	B_Evol	F_Evol		0
1nc570_130	NCU00712	NCU00712	NCU00712	probable 3-hydroxy-3-methylglutaryl-coenzyme A reductase	01 METABOLISM_01.06 lipid, fatty acid and isoprenoid metabolism_01.06.06 isoprenoid metabolism_01.06.06.11 tetracyclic and pentacyclic triterpenes (cholesterin, steroids and hopanoids) metabolism	;HMG-CoA_red;	Non-secretory protein	E_Evol	E_Evol	B_Evol		0
1nc570_140	NCU00713	NCU00713	NCU00713	related to pyrazinamidase/nicotinamidase	01 METABOLISM_01.02 nitrogen, sulfur and selenium metabolism_01.02.02 nitrogen metabolism_01.02.02.09 catabolism of nitrogenous compounds	;Isochorismatase;	Non-secretory protein	E_Evol	E_Evol	B_Evol		0
1nc570_150	NCU00714	NCU00714	NCU00714	probable stress-induced protein STI1	32 CELL RESCUE, DEFENSE AND VIRULENCE_32.01 stress response_40 CELL FATE_40.01 cell growth / morphogenesis	;TPR_1;TPR_2;TPR_3;TPR_1;TPR_2;TPR_1;TPR_2;TPR_3;eIF3_subunit;TPR_1;TPR_2;TPR_3;TPR_2;TPR_1;TPR_1;TPR_2;TPR_1;TPR_2;TPR_1;TPR_2;TPR_1;TPR_2;XPC-binding;	Non-secretory protein	E_Evol	E_Evol	E_Evol		0
1nc570_160	NCU00715	NCU00715	NCU00715	related to phenylacetaldehyde dehydrogenase	01 METABOLISM_01.01 amino acid metabolism_01.01.09 metabolism of the cysteine - aromatic group_01.01.09.04 metabolism of phenylalanine_01.01.09.04.01 biosynthesis of phenylalanine	;Aldedh;LuxC;	Non-secretory protein	E_Evol	E_Evol	E_Evol		0
1nc570_170	NCU00716	NCU00716	NCU00716	putative protein	99 UNCLASSIFIED PROTEINS	NULL	Signal peptide	F_Evol	F_Evol	F_Evol		0
1nc570_180	NCU00717	NCU00717	NCU00717	conserved hypothetical protein	99 UNCLASSIFIED PROTEINS	;DUF1212;	Non-secretory protein	B_Evol	F_Evol	F_Evol		0
1nc570_200	NCU00718	NCU00718	NCU00718	hypothetical protein	99 UNCLASSIFIED PROTEINS	NULL	Non-secretory protein	O_Evol	N_Evol	N_Evol		0
1nc570_230	NCU00720	NCU00720	NCU00720	probable L-lactate dehydrogenase	01 METABOLISM_01.05 C-compound and carbohydrate metabolism_02 ENERGY_02.01 glycolysis and gluconeogenesis	;Malic_M;ThiF;3HCDH_N;Ldh_1_N;NAD_Gly3P_dh_N;UDPG_MGDP_dh_N;DAO;Glyco_hydro_4;Semialdhyde_dh;Ldh_1_C;	Non-secretory protein	E_Evol	E_Evol	E_Evol		0
1nc570_240	NCU00721	NCU00721	NCU00721	probable proline-specific permease (proline transport protein)	20 CELLULAR TRANSPORT, TRANSPORT FACILITIES AND TRANSPORT ROUTES_20.01 transported compounds (substrates)_20.01.07 amino acid/amino acid derivatives transport_20.09 transport routes_20.09.18 cellular import_20.09.18.07 non-vesicular cellular import_70 SUBCELLULAR LOCALIZATION_70.02 eukaryotic plasma membrane / membrane attached	;AA_permease;DUF396;MASE1;	Non-secretory protein	E_Evol	E_Evol	B_Evol		0
1nc570_250	NCU00722	NCU00722	NCU00722	conserved hypothetical protein	99 UNCLASSIFIED PROTEINS	;Amidohydro_1;Amidohydro_3;Amidohydro_2;A_deaminase;AP_endonuc_2;	Non-secretory protein	E_Evol	E_Evol	E_Evol		0
1nc570_300	NCU00725	NCU00725	NCU00725	related to cytoskeletal adaptor	42 BIOGENESIS OF CELLULAR COMPONENTS_42.04 cytoskeleton/structural proteins_70 SUBCELLULAR LOCALIZATION_70.04 cytoskeleton	;ENTH;IF3_N;	Non-secretory protein	E_Evol	B_Evol	B_Evol		0
1nc570_310	NCU00726	NCU00726	NCU00726	peptidylprolyl isomerase precursor, mitochondrial (cyclophilin B)	14 PROTEIN FATE (folding, modification, destination)_14.01 protein folding and stabilization_70 SUBCELLULAR LOCALIZATION_70.16 mitochondrion	;Pro_isomerase;Pro_isomerase;	Non-secretory protein	E_Evol	E_Evol	E_Evol		0
1nc570_320	NCU00727	NCU00727	NCU00727	hypothetical protein	99 UNCLASSIFIED PROTEINS	;RNA_pol_Rpc34;	Non-secretory protein	F_Evol	F_Evol	F_Evol		0
1nc570_330	NCU00728	NCU00728	NCU00728	related to HOL1 protein (member of major facilitator superfamily)	20 CELLULAR TRANSPORT, TRANSPORT FACILITIES AND TRANSPORT ROUTES_20.01 transported compounds (substrates)_20.01.27 drug/toxin transport_20.09 transport routes_20.09.16 cellular export and secretion_32 CELL RESCUE, DEFENSE AND VIRULENCE_32.07 detoxification_32.07.05 detoxification by export	;DUF1275;Sugar_tr;MFS_1;	Non-secretory protein	B_Evol	F_Evol	F_Evol		0
1nc570_340	NCU00729	NCU00729	NCU00729	putative protein	99 UNCLASSIFIED PROTEINS	NULL	Signal peptide	B_Evol	F_Evol	F_Evol		0
1nc570_350	NCU00730	NCU00730	NCU00730	hypothetical protein	99 UNCLASSIFIED PROTEINS	;Zn_clus;Toxin_27;Fungal_trans;Mucin;	Non-secretory protein	F_Evol	N_Evol	N_Evol	4nc620_400	0
1nc570_370	NCU00733	NCU00733	NCU00733	hypothetical protein	99 UNCLASSIFIED PROTEINS	NULL	Non-secretory protein	N_Evol	N_Evol	N_Evol		0
1nc570_390	NCU00735	NCU00735	NCU00735	hypothetical protein	99 UNCLASSIFIED PROTEINS	NULL	Non-secretory protein	F_Evol	F_Evol	F_Evol		0
1nc570_400	NCU00736	NCU00736	NCU00736	related to molybdenum cofactor biosynthetic protein	01 METABOLISM_01.07 metabolism of vitamins, cofactors, and prosthetic groups_01.07.01 biosynthesis of vitamins, cofactors, and prosthetic groups	;ThiF;MoeZ_MoeB;Rhodanese;	Non-secretory protein	E_Evol	E_Evol	E_Evol		0
1nc570_410	NCU00737	NCU00737	NCU00737	conserved hypothetical protein	99 UNCLASSIFIED PROTEINS	;Pam17;	Non-secretory protein	B_Evol	F_Evol	F_Evol		0
1nc570_420	NCU00738	NCU00738	NCU00738	hypothetical protein	99 UNCLASSIFIED PROTEINS	;Keratin;Chromo;	Non-secretory protein	F_Evol	F_Evol	F_Evol		0
1nc570_430	NCU00739	NCU00739	NCU00739	hypothetical protein	99 UNCLASSIFIED PROTEINS	NULL	Non-secretory protein	N_Evol	N_Evol	N_Evol		0
1nc570_440	NCU00740	NCU00740	NCU00740	hypothetical protein	99 UNCLASSIFIED PROTEINS	;Extensin_2;	Non-secretory protein	N_Evol	N_Evol	N_Evol		0
1nc570_450	NCU00741	NCU00741	NCU00741	putative protein	99 UNCLASSIFIED PROTEINS	;Extensin_2;	Non-secretory protein	F_Evol	F_Evol	F_Evol		0
1nc570_460	NCU00742	NCU00742	NCU00742	probable glycerol-3-phosphate dehydrogenase (NAD)	01 METABOLISM_01.06 lipid, fatty acid and isoprenoid metabolism_01.06.05 fatty acid metabolism_16 PROTEIN WITH BINDING FUNCTION OR COFACTOR REQUIREMENT (structural or catalytic)_16.21 complex cofactor/cosubstrate/vitamine binding_16.21.07 NAD/NADP binding	;NAD_Gly3P_dh_N;NAD_Gly3P_dh_C;	Non-secretory protein	E_Evol	E_Evol	E_Evol		0
1nc570_470	NCU00743	NCU00743	NCU00743	probable 4-alpha-glucanotransferase / amylo-1,6-glucosidase (glycogen-debranching enzyme)	01 METABOLISM_01.05 C-compound and carbohydrate metabolism_02 ENERGY_02.19 metabolism of energy reserves (e.g. glycogen, trehalose)	;GDE_C;	Non-secretory protein	E_Evol	E_Evol	E_Evol		0
1nc570_480	NCU00744	NCU00744	NCU00744	putative protein	99 UNCLASSIFIED PROTEINS	NULL	Non-secretory protein	F_Evol	F_Evol	F_Evol		0
1nc570_500	NCU00746	NCU00746	NCU00746	hypothetical protein	99 UNCLASSIFIED PROTEINS	NULL	Non-secretory protein	N_Evol	N_Evol	N_Evol		0
1nc570_510	NCU00747	NCU00747	NCU00747	hypothetical protein	99 UNCLASSIFIED PROTEINS	NULL	Non-secretory protein	N_Evol	N_Evol	N_Evol		0
1nc570_520	NCU00748	NCU00748	NCU00748	hypothetical protein	99 UNCLASSIFIED PROTEINS	NULL	Non-secretory protein	F_Evol	N_Evol	N_Evol		0
1nc570_530	NCU00749	NCU00749	NCU00749	hypothetical protein	99 UNCLASSIFIED PROTEINS	;HLH;	Non-secretory protein	F_Evol	N_Evol	N_Evol		0
1nc564_030	NCU00752	NCU00752	NCU00752	hypothetical protein	99 UNCLASSIFIED PROTEINS	;Tannase;	Non-secretory protein	N_Evol	N_Evol	N_Evol	xnc103_060	0
1nc564_040	NCU00753	NCU00753	NCU00753	hypothetical protein	99 UNCLASSIFIED PROTEINS	;GRP;	Non-secretory protein	F_Evol	F_Evol	F_Evol		0
1nc564_060	NCU00755	NCU00755	NCU00755	related to ethionine resistance protein	20 CELLULAR TRANSPORT, TRANSPORT FACILITIES AND TRANSPORT ROUTES_20.01 transported compounds (substrates)_20.01.27 drug/toxin transport_32 CELL RESCUE, DEFENSE AND VIRULENCE_32.07 detoxification_32.07.05 detoxification by export	;MatE;Ammonium_transp;BacA;MatE;CD20;ATP-synt_A;	Non-secretory protein	E_Evol	F_Evol	F_Evol		0
1nc564_080	NCU00757	NCU00757	NCU00757	hypothetical protein	99 UNCLASSIFIED PROTEINS	NULL	Signal peptide	B_Evol	F_Evol	F_Evol		0
90c4_330	NCU00758	NCU00758	NCU00758	related to formate transport protein	20 CELLULAR TRANSPORT, TRANSPORT FACILITIES AND TRANSPORT ROUTES_20.01 transported compounds (substrates)_20.01.03 C-compound and carbohydrate transport_20.03 transport facilities	;Form_Nir_trans;	Non-secretory protein	E_Evol	F_Evol	F_Evol		0
90c4_320	NCU00759	NCU00759	NCU00759	hypothetical protein	99 UNCLASSIFIED PROTEINS	NULL	Non-secretory protein	N_Evol	N_Evol	N_Evol		0
90c4_310	NCU00760	NCU00760	NCU00760	hypothetical protein	99 UNCLASSIFIED PROTEINS	NULL	Non-secretory protein	N_Evol	N_Evol	N_Evol		0
90c4_290	NCU00762	NCU00762	NCU00762	probable cellulase precursor	01 METABOLISM_01.05 C-compound and carbohydrate metabolism_32 CELL RESCUE, DEFENSE AND VIRULENCE_32.10 degradation / modification of foreign (exogenous) compounds_32.10.07 degradation / modification of foreign (exogenous) polysaccharides	;CBM_1;Cellulase;	Signal peptide	E_Evol	E_Evol	B_Evol		0
90c4_280	NCU00763	NCU00763	NCU00763	hypothetical protein	99 UNCLASSIFIED PROTEINS	;Pkinase;Pkinase_Tyr;Extensin_2;	Non-secretory protein	N_Evol	N_Evol	N_Evol	3nc130_140	0
90c4_270	NCU00764	NCU00764	NCU00764	hypothetical protein	99 UNCLASSIFIED PROTEINS	NULL	Non-secretory protein	N_Evol	N_Evol	N_Evol		0
90c4_250	NCU00766	NCU00766	NCU00766	conserved hypothetical protein	99 UNCLASSIFIED PROTEINS	NULL	Non-secretory protein	N_Evol	N_Evol	N_Evol		0
90c4_240	NCU00767	NCU00767	NCU00767	hypothetical protein	99 UNCLASSIFIED PROTEINS	;SNARE_assoc;	Non-secretory protein	N_Evol	N_Evol	N_Evol		0
90c4_230	NCU00768	NCU00768	NCU00768	related to polyadenylate-binding protein	11 TRANSCRIPTION_11.02 RNA synthesis_11.02.03 mRNA synthesis	;RRM_1;RRM_1;Extensin_2;RRM_1;	Non-secretory protein	E_Evol	E_Evol	E_Evol		0
90c4_220	NCU00769	NCU00769	NCU00769	hypothetical protein	99 UNCLASSIFIED PROTEINS	NULL	Non-secretory protein	N_Evol	N_Evol	N_Evol		0
90c4_210	NCU00770	NCU00770	NCU00770	related to ECM29 protein	42 BIOGENESIS OF CELLULAR COMPONENTS_42.01 cell wall	;HEAT;HEAT;HEAT;HEAT;HEAT;HEAT;HEAT;HEAT;	Non-secretory protein	O_Evol	F_Evol	F_Evol		0
90c4_200	NCU00771	NCU00771	NCU00771	conserved hypothetical protein	99 UNCLASSIFIED PROTEINS	;UBA;UIM;UBX;	Non-secretory protein	A_Evol	F_Evol	F_Evol		0
90c4_190	NCU00772	NCU00772	NCU00772	related to severin kinase	14 PROTEIN FATE (folding, modification, destination)_14.07 protein modification_14.07.03 modification by phosphorylation, dephosphorylation, autophosphorylation_30 CELLULAR COMMUNICATION/SIGNAL TRANSDUCTION MECHANISM_30.01 cellular signalling	;Pkinase;Pkinase_Tyr;Extensin_2;	Non-secretory protein	E_Evol	E_Evol	E_Evol		0
90c4_180	NCU00773	NCU00773	NCU00773	hypothetical protein	99 UNCLASSIFIED PROTEINS	NULL	Signal peptide	F_Evol	N_Evol	N_Evol	b14a6_260	0
90c4_170	NCU00774	NCU00774	NCU00774	hypothetical protein	99 UNCLASSIFIED PROTEINS	NULL	Non-secretory protein	F_Evol	N_Evol	N_Evol		0
90c4_160	NCU00775	NCU00775	NCU00775	probable isocitrate dehydrogenase [NAD] subunit 1, mitochondrial precursor	01 METABOLISM_01.05 C-compound and carbohydrate metabolism_02 ENERGY_02.10 tricarboxylic-acid pathway (citrate cycle, Krebs cycle, TCA cycle)_70 SUBCELLULAR LOCALIZATION_70.16 mitochondrion	;Iso_dh;	Non-secretory protein	E_Evol	E_Evol	E_Evol		0
90c4_150	NCU00776	NCU00776	NCU00776	tyrosinase precursor	01 METABOLISM_01.20 secondary metabolism_01.20.35 metabolism of secondary products derived from L-phenylalanine and L-tyrosine_01.20.35.01 metabolism of phenylpropanoids_01.20.35.01.01 metabolism of melanins	;Tyrosinase;	Non-secretory protein	B_Evol	B_Evol	F_Evol		0
90c4_140	NCU00777	NCU00777	NCU00777	conserved hypothetical protein	99 UNCLASSIFIED PROTEINS	;CMAS;Ubie_methyltran;Methyltransf_11;Methyltransf_12;	Non-secretory protein	E_Evol	E_Evol	E_Evol		0
90c4_130	NCU00778	NCU00778	NCU00778	related to transmembrane protein Tex-261	98 CLASSIFICATION NOT YET CLEAR-CUT	;DUF396;CTP_transf_1;	Signal peptide	E_Evol	E_Evol	E_Evol		0
90c4_120	NCU00779	NCU00779	NCU00779	putative protein	99 UNCLASSIFIED PROTEINS	NULL	Non-secretory protein	N_Evol	N_Evol	N_Evol		0
90c4_110	NCU00780	NCU00780	NCU00780	related to D-lactate dehydrogenase	02 ENERGY_02.45 energy conversion and regeneration	;2-Hacid_dh;2-Hacid_dh_C;AdoHcyase_NAD;Shikimate_DH;IlvN;NAD_binding_2;UDPG_MGDP_dh_C;	Non-secretory protein	E_Evol	E_Evol	E_Evol		0
90c4_100	NCU00781	NCU00781	NCU00781	hypothetical protein	99 UNCLASSIFIED PROTEINS	NULL	Non-secretory protein	F_Evol	N_Evol	N_Evol		0
90c4_090	NCU00782	NCU00782	NCU00782	related to allantoate permease	20 CELLULAR TRANSPORT, TRANSPORT FACILITIES AND TRANSPORT ROUTES_20.01 transported compounds (substrates)_20.01.23 allantoin and allantoate transport_20.03 transport facilities_20.09 transport routes_20.09.18 cellular import_70 SUBCELLULAR LOCALIZATION_70.02 eukaryotic plasma membrane / membrane attached	;Sugar_tr;MFS_1;DUF895;DUF81;MARVEL;	Non-secretory protein	E_Evol	B_Evol	B_Evol		0
90c4_080	NCU00783	NCU00783	NCU00783	hypothetical protein	99 UNCLASSIFIED PROTEINS	NULL	Non-secretory protein	N_Evol	N_Evol	N_Evol		0
90c4_070	NCU00784	NCU00784	NCU00784	conserved hypothetical protein	99 UNCLASSIFIED PROTEINS	;FMO-like;HI0933_like;DAO;Pyr_redox;Pyr_redox_2;Amino_oxidase;GreA_GreB;	Non-secretory protein	E_Evol	B_Evol	B_Evol		0
90c4_060	NCU00786	NCU00786	NCU00786	putative protein	99 UNCLASSIFIED PROTEINS	;Dicty_CAR;7tm_2;7tm_1;SNARE_assoc;	Non-secretory protein	F_Evol	F_Evol	F_Evol		0
90c4_050	NCU00787	NCU00787	NCU00787	conserved hypothetical protein	99 UNCLASSIFIED PROTEINS	NULL	Non-secretory protein	F_Evol	F_Evol	F_Evol		0
90c4_040	NCU00788	NCU00788	NCU00788	related to interferon-regulated resistance GTP-binding protein	32 CELL RESCUE, DEFENSE AND VIRULENCE_32.05 disease, virulence and defense_32.05.01 resistance proteins	;MMR_HSR1;Miro;Dynamin_N;Dynamin_M;	Non-secretory protein	F_Evol	F_Evol	F_Evol		0
90c4_030	NCU00789	NCU00789	NCU00789	conserved hypothetical protein	99 UNCLASSIFIED PROTEINS	;PSI_PsaJ;DUF221;Psf3;Rab5ip;Sre;	Non-secretory protein	B_Evol	A_Evol	F_Evol		0
90c4_010	NCU00790	NCU00790	NCU00790	potassium transporter HAK-1	20 CELLULAR TRANSPORT, TRANSPORT FACILITIES AND TRANSPORT ROUTES_20.01 transported compounds (substrates)_20.01.01 ion transport_20.01.01.01 cation transport (H+, Na+, K+, Ca2+ , NH4+, etc.)_20.03 transport facilities_20.09 transport routes_20.09.18 cellular import	;K_trans;Zn_peptidase_2;	Non-secretory protein	E_Evol	O_Evol	F_Evol		0
1nc562_020	NCU00793	NCU00793	NCU00793	related to alpha,alpha-trehalose-phosphate synthase (UDP-forming)	01 METABOLISM_01.05 C-compound and carbohydrate metabolism_02 ENERGY_02.19 metabolism of energy reserves (e.g. glycogen, trehalose)	;Glyco_transf_20;SecA_SW;Hydrolase_3;Trehalose_PPase;Lac_bphage_repr;	Non-secretory protein	E_Evol	B_Evol	B_Evol		0
1nc562_040	NCU00794	NCU00794	NCU00794	probable WD40-repeat protein (notchless protein)	16 PROTEIN WITH BINDING FUNCTION OR COFACTOR REQUIREMENT (structural or catalytic)_16.01 protein binding_18 REGULATION OF METABOLISM AND PROTEIN FUNCTION_18.02 regulation of protein activity_18.02.01 enzymatic activity regulation / enzyme regulator_30 CELLULAR COMMUNICATION/SIGNAL TRANSDUCTION MECHANISM_30.05 transmembrane signal transduction_30.05.02 non-enzymatic receptor mediated signalling_30…	;WD40;WD40;WD40;WD40;WD40;WD40;WD40;WD40;	Non-secretory protein	E_Evol	E_Evol	E_Evol		0
1nc562_050	NCU00795	NCU00795	NCU00795	related to Ca2+/H+-exchanging protein, vacuolar	20 CELLULAR TRANSPORT, TRANSPORT FACILITIES AND TRANSPORT ROUTES_20.01 transported compounds (substrates)_20.01.01 ion transport_20.01.01.01 cation transport (H+, Na+, K+, Ca2+ , NH4+, etc.)_20.03 transport facilities_20.03.02 carrier (electrochemical potential-driven transport)_20.03.02.03 antiporter_20.09 transport routes_20.09.13 vacuolar/lysosomal transport_34 INTERACTION WITH THE ENVIRONMENT…	;EI24;Trp_Tyr_perm;Mem_trans;CitMHS;MFS_1;Presenilin;DctM;DUF112;Na_Ca_ex;Peptidase_M50;Zip;Na_Ca_ex;	Non-secretory protein	E_Evol	B_Evol	F_Evol		0
1nc562_080	NCU00797	NCU00797	NCU00797	related to NADPH-dependent aldehyde reductase	01 METABOLISM_01.05 C-compound and carbohydrate metabolism	;Epimerase;3Beta_HSD;	Non-secretory protein	E_Evol	B_Evol	F_Evol		0
1nc562_090	NCU00798	NCU00798	NCU00798	hypothetical protein	99 UNCLASSIFIED PROTEINS	NULL	Signal peptide	F_Evol	N_Evol	N_Evol		0
1nc562_100	NCU00799	NCU00799	NCU00799	related to homocysteine S-methyltransferase	01 METABOLISM_01.01 amino acid metabolism_01.01.06 metabolism of the aspartate family_01.01.06.05 metabolism of methionine_01.01.06.05.01 biosynthesis of methionine_01.01.06.05.02 degradation of methionine	;S-methyl_trans;	Non-secretory protein	E_Evol	E_Evol	B_Evol		0
1nc562_110	NCU00800	NCU00800	NCU00800	related to protein kinase	10 CELL CYCLE AND DNA PROCESSING_10.03 cell cycle_10.03.01 mitotic cell cycle and cell cycle control_14 PROTEIN FATE (folding, modification, destination)_14.07 protein modification_14.07.03 modification by phosphorylation, dephosphorylation, autophosphorylation_30 CELLULAR COMMUNICATION/SIGNAL TRANSDUCTION MECHANISM_30.01 cellular signalling	NULL	Non-secretory protein	N_Evol	N_Evol	N_Evol		0
1nc560_310	NCU00801	NCU00801	NCU00801	related to lactose permease	20 CELLULAR TRANSPORT, TRANSPORT FACILITIES AND TRANSPORT ROUTES_20.01 transported compounds (substrates)_20.01.03 C-compound and carbohydrate transport_20.09 transport routes_20.09.18 cellular import_20.09.18.07 non-vesicular cellular import_70 SUBCELLULAR LOCALIZATION_70.02 eukaryotic plasma membrane / membrane attached	;Sugar_tr;MFS_1;DUF929;	Non-secretory protein	B_Evol	B_Evol	F_Evol		0
1nc560_300	NCU00802	NCU00802	NCU00802	hypothetical protein	99 UNCLASSIFIED PROTEINS	;DUF373;	Non-secretory protein	B_Evol	B_Evol	B_Evol		0
1nc560_290	NCU00803	NCU00803	NCU00803	related to putative tartrate transporter	20 CELLULAR TRANSPORT, TRANSPORT FACILITIES AND TRANSPORT ROUTES_20.01 transported compounds (substrates)_20.01.03 C-compound and carbohydrate transport_20.09 transport routes_20.09.18 cellular import_20.09.18.07 non-vesicular cellular import_70 SUBCELLULAR LOCALIZATION_70.02 eukaryotic plasma membrane / membrane attached	;Sugar_tr;MFS_1;CitMHS;DUF895;	Non-secretory protein	B_Evol	F_Evol	F_Evol		0
1nc560_280	NCU00805	NCU00805	NCU00805	hypothetical protein	99 UNCLASSIFIED PROTEINS	NULL	Non-secretory protein	O_Evol	F_Evol	F_Evol		0
1nc560_260	NCU00807	NCU00807	NCU00807	hypothetical protein	99 UNCLASSIFIED PROTEINS	NULL	Non-secretory protein	N_Evol	N_Evol	N_Evol		0
1nc560_250	NCU00808	NCU00808	NCU00808	conserved hypothetical protein	99 UNCLASSIFIED PROTEINS	;Zn_clus;Gastrin;Fungal_trans;	Non-secretory protein	F_Evol	F_Evol	F_Evol		0
1nc560_240	NCU00809	NCU00809	NCU00809	related to lactose permease	20 CELLULAR TRANSPORT, TRANSPORT FACILITIES AND TRANSPORT ROUTES_20.01 transported compounds (substrates)_20.01.03 C-compound and carbohydrate transport_20.09 transport routes_20.09.18 cellular import_20.09.18.07 non-vesicular cellular import_70 SUBCELLULAR LOCALIZATION_70.02 eukaryotic plasma membrane / membrane attached	;Sugar_tr;MFS_1;	Non-secretory protein	E_Evol	B_Evol	B_Evol		0
1nc560_230	NCU00810	NCU00810	NCU00810	related to beta-galactosidase	01 METABOLISM_01.05 C-compound and carbohydrate metabolism_01.05.02 sugar, glucoside, polyol and carboxylate metabolism_01.05.02.07 sugar, glucoside, polyol and carboxylate catabolism	;Glyco_hydro_2_N;Glyco_hydro_2;Glyco_hydro_2_C;Glyco_hydro_42;Bgal_small_N;	Non-secretory protein	O_Evol	O_Evol	O_Evol		0
1nc560_220	NCU00811	NCU00811	NCU00811	related to Allergen Asp f 4	99 UNCLASSIFIED PROTEINS	NULL	Signal peptide	F_Evol	F_Evol	F_Evol		0
1nc560_210	NCU00812	NCU00812	NCU00812	related to 3`->5` exoribonuclease required for 3` end formation of 5.8S rRNA	01 METABOLISM_01.03 nucleotide/nucleoside/nucleobase metabolism_01.03.16 polynucleotide degradation_01.03.16.01 RNA degradation_11 TRANSCRIPTION_11.04 RNA processing_11.04.01 rRNA processing	;RNase_PH;	Non-secretory protein	E_Evol	E_Evol	E_Evol		0
1nc560_200	NCU00813	NCU00813	NCU00813	probable protein disulfide isomerase-related protein A	14 PROTEIN FATE (folding, modification, destination)_14.01 protein folding and stabilization_70 SUBCELLULAR LOCALIZATION_70.07 endoplasmic reticulum	;AhpC-TSA;Redoxin;Thioredoxin;HyaE;HPC2;	Signal peptide	B_Evol	F_Evol	F_Evol		0
1nc560_190	NCU00814	NCU00814	NCU00814	conserved hypothetical protein	99 UNCLASSIFIED PROTEINS	;DUF605;Extensin_2;	Non-secretory protein	E_Evol	B_Evol	F_Evol		0
1nc560_180	NCU00815	NCU00815	NCU00815	hypothetical protein	99 UNCLASSIFIED PROTEINS	NULL	Non-secretory protein	N_Evol	N_Evol	N_Evol		0
1nc560_170	NCU00817	NCU00817	NCU00817	hypothetical protein	99 UNCLASSIFIED PROTEINS	NULL	Non-secretory protein	N_Evol	N_Evol	N_Evol		0
1nc560_160	NCU00818	NCU00818	NCU00818	hypothetical protein	99 UNCLASSIFIED PROTEINS	NULL	Non-secretory protein	F_Evol	F_Evol	F_Evol		0
1nc560_140	NCU00821	NCU00821	NCU00821	related to sugar transport protein STL1	20 CELLULAR TRANSPORT, TRANSPORT FACILITIES AND TRANSPORT ROUTES_20.01 transported compounds (substrates)_20.01.03 C-compound and carbohydrate transport_20.09 transport routes_20.09.18 cellular import_70 SUBCELLULAR LOCALIZATION_70.02 eukaryotic plasma membrane / membrane attached	;Sugar_tr;MFS_1;	Non-secretory protein	E_Evol	B_Evol	B_Evol		0
1nc560_130	NCU00822	NCU00822	NCU00822	conserved hypothetical protein	99 UNCLASSIFIED PROTEINS	NULL	Signal peptide	B_Evol	F_Evol	F_Evol		0
1nc560_110	NCU00823	NCU00823	NCU00823	probable multidrug resistance protein	20 CELLULAR TRANSPORT, TRANSPORT FACILITIES AND TRANSPORT ROUTES_20.01 transported compounds (substrates)_20.01.27 drug/toxin transport_32 CELL RESCUE, DEFENSE AND VIRULENCE_32.05 disease, virulence and defense_32.05.01 resistance proteins	;Mov34;	Non-secretory protein	E_Evol	E_Evol	E_Evol		0
1nc560_100	NCU00824	NCU00824	NCU00824	probable histone deacetylase RpdA	10 CELL CYCLE AND DNA PROCESSING_10.01 DNA processing_10.01.09 DNA restriction or modification_10.01.09.05 DNA conformation modification (e.g. chromatin)_11 TRANSCRIPTION_11.02 RNA synthesis_11.02.03 mRNA synthesis_11.02.03.04 transcriptional control_14 PROTEIN FATE (folding, modification, destination)_14.07 protein modification_14.07.04 modification by acetylation, deacetylation_70 SUBCELLULAR L…	;Hist_deacetyl;	Non-secretory protein	E_Evol	E_Evol	E_Evol		0
1nc560_090	NCU00825	NCU00825	NCU00825	conserved hypothetical protein	99 UNCLASSIFIED PROTEINS	;Abhydrolase_1;Abhydrolase_4;	Signal peptide	E_Evol	B_Evol	F_Evol		0
1nc560_080	NCU00826	NCU00826	NCU00826	hypothetical protein	99 UNCLASSIFIED PROTEINS	;Mucin;Glycophorin_A;	Non-secretory protein	F_Evol	N_Evol	N_Evol	1nc495_120	0
1nc560_070	NCU00827	NCU00827	NCU00827	putative protein	99 UNCLASSIFIED PROTEINS	NULL	Non-secretory protein	N_Evol	N_Evol	N_Evol		0
1nc560_060	NCU00828	NCU00828	NCU00828	related to peroxisomal membrane protein 4	70 SUBCELLULAR LOCALIZATION_70.19 peroxisome	;Tim17;	Non-secretory protein	E_Evol	E_Evol	E_Evol		0
1nc560_050	NCU00829	NCU00829	NCU00829	related to ferric reductase FRE2 precursor	34 INTERACTION WITH THE ENVIRONMENT_34.01 homeostasis_34.01.01.01 homeostasis of metal ions (Na, K, Ca etc.)_70 SUBCELLULAR LOCALIZATION_70.02 eukaryotic plasma membrane / membrane attached	;Ferric_reduct;FAD_binding_8;NAD_binding_6;NAD_binding_1;	Non-secretory protein	B_Evol	B_Evol	B_Evol		0
1nc560_040	NCU00830	NCU00830	NCU00830	related to copper transport protein	20 CELLULAR TRANSPORT, TRANSPORT FACILITIES AND TRANSPORT ROUTES_20.01 transported compounds (substrates)_20.01.01 ion transport_20.01.01.01 cation transport (H+, Na+, K+, Ca2+ , NH4+, etc.)_20.01.01.01.01 heavy metal ion transport (Cu+, Fe3+, etc.)_20.09 transport routes_20.09.18 cellular import_34 INTERACTION WITH THE ENVIRONMENT_34.01 homeostasis_34.01.01 homeostasis of cations_34.01.01.01 hom…	;Ctr;	Non-secretory protein	B_Evol	B_Evol	B_Evol		0
1nc560_020	NCU00832	NCU00832	NCU00832	putative protein	99 UNCLASSIFIED PROTEINS	NULL	Non-secretory protein	F_Evol	F_Evol	F_Evol		0
1nc560_010	NCU00833	NCU00833	NCU00833	hypothetical protein	99 UNCLASSIFIED PROTEINS	;HMG_box;	Non-secretory protein	N_Evol	N_Evol	N_Evol	xnc120_210	0
g15g1_010	NCU07736	NCU00834	NCU00834	related to potential drug facilitator PEP5	20 CELLULAR TRANSPORT, TRANSPORT FACILITIES AND TRANSPORT ROUTES_20.01 transported compounds (substrates)_20.01.27 drug/toxin transport_20.09 transport routes_20.09.16 cellular export and secretion_32 CELL RESCUE, DEFENSE AND VIRULENCE_32.05 disease, virulence and defense_32.05.05 virulence, disease factors	;TRI12;H_PPase;DUF112;Sugar_tr;MASE1;MFS_1;Sugar_transport;OPT;Branch_AA_trans;HlyIII;7tm_4;Na_H_antiport_1;NicO;Xan_ur_permease;aPHC;Ferric_reduct;Zip;ATP-synt_A;7TMR-DISM_7TM;DUF1275;	Non-secretory protein	F_Evol	N_Evol	N_Evol		0
1nc557_010	NCU00835	NCU00835	NCU00835	hypothetical protein	99 UNCLASSIFIED PROTEINS	;Integrin_alpha;	Non-secretory protein	F_Evol	F_Evol	N_Evol		0
1nc557_020	NCU00836	NCU00836	NCU00836	related to family 61 glucanase	01 METABOLISM_01.05 C-compound and carbohydrate metabolism_01.05.02 sugar, glucoside, polyol and carboxylate metabolism_01.05.02.07 sugar, glucoside, polyol and carboxylate catabolism	;Glyco_hydro_61;CBM_1;	Signal peptide	E_Evol	B_Evol	B_Evol		0
1nc555_010	NCU00838	NCU00838	NCU00838	related to dehydroshikimate dehydratase	01 METABOLISM_01.05 C-compound and carbohydrate metabolism	;AP_endonuc_2;	Non-secretory protein	E_Evol	B_Evol	B_Evol		0
1nc555_020	NCU00839	NCU00839	NCU00839	hypothetical protein	99 UNCLASSIFIED PROTEINS	NULL	Non-secretory protein	N_Evol	N_Evol	N_Evol		0
1nc555_040	NCU00841	NCU00841	NCU00841	hypothetical protein	99 UNCLASSIFIED PROTEINS	;HAP1_N;ERM;SURF6;Filament;	Non-secretory protein	N_Evol	N_Evol	N_Evol		0
1nc555_050	NCU00842	NCU00842	NCU00842	putative protein	99 UNCLASSIFIED PROTEINS	NULL	Non-secretory protein	N_Evol	N_Evol	N_Evol	g65a3_060	0
1nc555_060	NCU00843	NCU00843	NCU00843	related to glycinamide ribonucleotide transformylase	01 METABOLISM_01.03 nucleotide/nucleoside/nucleobase metabolism_01.03.01 purin nucleotide/nucleoside/nucleobase metabolism_70 SUBCELLULAR LOCALIZATION_70.03 cytoplasm	;Formyl_trans_N;	Non-secretory protein	E_Evol	E_Evol	E_Evol		0
1nc555_070	NCU00844	NCU00844	NCU00844	putative protein	99 UNCLASSIFIED PROTEINS	NULL	Non-secretory protein	F_Evol	N_Evol	N_Evol	b19a17_100	0
1nc555_090	NCU00846	NCU00846	NCU00846	hypothetical protein	99 UNCLASSIFIED PROTEINS	NULL	Non-secretory protein	N_Evol	N_Evol	N_Evol		0
1nc555_100	NCU00847	NCU00847	NCU00847	related to 7alpha-cephem-methoxylase P8 chain	01 METABOLISM_01.20 secondary metabolism	NULL	Non-secretory protein	E_Evol	E_Evol	E_Evol		0
1nc555_110	NCU00848	NCU00848	NCU00848	conserved hypothetical protein	99 UNCLASSIFIED PROTEINS	;Ferric_reduct;	Non-secretory protein	E_Evol	E_Evol	B_Evol		0
1nc555_120	NCU00849	NCU00849	NCU00849	hypothetical protein	99 UNCLASSIFIED PROTEINS	NULL	Non-secretory protein	N_Evol	N_Evol	N_Evol		0
1nc555_130	NCU00850	NCU00850	NCU00850	hypothetical protein	99 UNCLASSIFIED PROTEINS	;DUF827;M;M;	Non-secretory protein	N_Evol	N_Evol	N_Evol		0
xnc081_140	NULL	NCU00851	NCU00851	hypothetical protein	99 UNCLASSIFIED PROTEINS	NULL	Non-secretory protein	N_Evol	N_Evol	N_Evol		0
1nc555_140	NCU00852	NCU00852	NCU00852	hypothetical protein	99 UNCLASSIFIED PROTEINS	;Glyco_hydro_43;	Signal peptide	E_Evol	E_Evol	B_Evol		0
1nc550_010	NCU00855	NCU00855	NCU00855	hypothetical protein	99 UNCLASSIFIED PROTEINS	NULL	Signal peptide	B_Evol	F_Evol	F_Evol		0
1nc550_020	NCU00856	NCU00856	NCU00856	conserved hypothetical protein	99 UNCLASSIFIED PROTEINS	;Hep_59;SnoaL;	Non-secretory protein	F_Evol	N_Evol	N_Evol		0
1nc550_030	NCU00857	NCU00857	NCU00857	related to putative multidrug transporter Mfs1.1 (major facilitator family protein)	20 CELLULAR TRANSPORT, TRANSPORT FACILITIES AND TRANSPORT ROUTES_20.01 transported compounds (substrates)_20.01.27 drug/toxin transport_20.09 transport routes_20.09.16 cellular export and secretion_32 CELL RESCUE, DEFENSE AND VIRULENCE_32.07 detoxification	;TRI12;LacY_symp;Na_sulph_symp;MFS_1;Sugar_tr;MtrD;Cation_efflux;	Non-secretory protein	E_Evol	F_Evol	F_Evol		0
1nc550_050	NCU00860	NCU00860	NCU00860	related to low affininty zinc transporter	20 CELLULAR TRANSPORT, TRANSPORT FACILITIES AND TRANSPORT ROUTES_20.01 transported compounds (substrates)_20.01.01 ion transport_20.01.01.01 cation transport (H+, Na+, K+, Ca2+ , NH4+, etc.)_20.01.01.01.01 heavy metal ion transport (Cu+, Fe3+, etc.)_34 INTERACTION WITH THE ENVIRONMENT_34.01 homeostasis_34.01.01 homeostasis of cations_34.01.01.01 homeostasis of metal ions (Na, K, Ca etc.)	;MFS_1;Zip;DsbD;	Non-secretory protein	E_Evol	A_Evol	F_Evol		0
1nc550_060	NCU00861	NCU00861	NCU00861	conserved hypothetical protein	99 UNCLASSIFIED PROTEINS	NULL	Signal peptide	O_Evol	F_Evol	F_Evol		0
1nc550_070	NCU00862	NCU00862	NCU00862	hypothetical protein	99 UNCLASSIFIED PROTEINS	;Glycophorin_A;	Non-secretory protein	N_Evol	N_Evol	N_Evol		0
1nc550_080	NCU00863	NCU00863	NCU00863	conserved hypothetical protein	99 UNCLASSIFIED PROTEINS	;UPF0261;	Non-secretory protein	E_Evol	E_Evol	E_Evol		0
1nc550_090	NCU00864	NCU00864	NCU00864	conserved hypothetical protein	99 UNCLASSIFIED PROTEINS	;B12-binding;AP_endonuc_2;	Non-secretory protein	E_Evol	E_Evol	E_Evol		0
1nc550_100	NCU00865	NCU00865	NCU00865	probable oxalate decarboxylase	01 METABOLISM_01.05 C-compound and carbohydrate metabolism_32 CELL RESCUE, DEFENSE AND VIRULENCE_32.05 disease, virulence and defense	;Cupin_1;Cupin_2;GPI;Cupin_1;Cupin_3;Cupin_2;	Signal peptide	E_Evol	E_Evol	E_Evol		0
1nc550_110	NCU00866	NCU00866	NCU00866	putative protein	99 UNCLASSIFIED PROTEINS	;7tm_4;DUF1275;	Non-secretory protein	B_Evol	F_Evol	F_Evol		0
1nc550_130	NCU00868	NCU00868	NCU00868	putative protein	99 UNCLASSIFIED PROTEINS	;Acetyltransf_1;	Non-secretory protein	F_Evol	F_Evol	F_Evol		0
1nc550_140	NCU00869	NCU00869	NCU00869	putative protein	99 UNCLASSIFIED PROTEINS	NULL	Non-secretory protein	F_Evol	N_Evol	N_Evol		0
1nc550_150	NCU00870	NCU00870	NCU00870	conserved hypothetical protein	99 UNCLASSIFIED PROTEINS	;TPR_1;TPR_2;TPR_1;TPR_2;SET;	Non-secretory protein	F_Evol	F_Evol	F_Evol		0
1nc550_160	NCU00871	NCU00871	NCU00871	hypothetical protein	99 UNCLASSIFIED PROTEINS	NULL	Non-secretory protein	N_Evol	N_Evol	N_Evol		0
1nc550_170	NCU00872	NCU00872	NCU00872	hypothetical protein	99 UNCLASSIFIED PROTEINS	;PalI;	Signal peptide	F_Evol	F_Evol	F_Evol		0
1nc550_180	NCU00873	NCU00873	NCU00873	conserved hypothetical protein	99 UNCLASSIFIED PROTEINS	;Fructosamin_kin;APH;	Non-secretory protein	E_Evol	F_Evol	F_Evol		0
1nc550_200	NCU00875	NCU00875	NCU00875	related to antibiotic resistance protein	20 CELLULAR TRANSPORT, TRANSPORT FACILITIES AND TRANSPORT ROUTES_20.01 transported compounds (substrates)_20.01.27 drug/toxin transport_20.09 transport routes_20.09.16 cellular export and secretion_32 CELL RESCUE, DEFENSE AND VIRULENCE_32.05 disease, virulence and defense_32.05.01 resistance proteins_32.05.01.01 antibiotic resistance_32.07 detoxification_32.07.05 detoxification by export	;TatC;Sugar_tr;MFS_1;Lactate_perm;DUF21;DUF81;HtpX_N;LrgB;	Non-secretory protein	B_Evol	B_Evol	F_Evol		0
1nc550_210	NCU00876	NCU00876	NCU00876	related to ferric reductase	20 CELLULAR TRANSPORT, TRANSPORT FACILITIES AND TRANSPORT ROUTES_20.09 transport routes_20.09.18 cellular import_34 INTERACTION WITH THE ENVIRONMENT_34.01 homeostasis_34.01.01 homeostasis of cations_34.01.01.01 homeostasis of metal ions (Na, K, Ca etc.)	;Ferric_reduct;FAD_binding_8;NAD_binding_6;NAD_binding_1;	Non-secretory protein	F_Evol	F_Evol	F_Evol		0
1nc550_220	NCU00877	NCU00877	NCU00877	hypothetical protein	99 UNCLASSIFIED PROTEINS	;CsbD;Orthopox_C10L;	Non-secretory protein	F_Evol	F_Evol	F_Evol		0
1nc550_230	NCU00878	NCU00878	NCU00878	putative protein	99 UNCLASSIFIED PROTEINS	NULL	Non-secretory protein	F_Evol	F_Evol	F_Evol		0
1nc550_260	NCU00881	NCU00881	NCU00881	putative protein	99 UNCLASSIFIED PROTEINS	NULL	Signal peptide	B_Evol	F_Evol	F_Evol		0
1nc550_270	NCU00882	NCU00882	NCU00882	hypothetical protein	99 UNCLASSIFIED PROTEINS	NULL	Non-secretory protein	F_Evol	F_Evol	F_Evol		0
1nc550_280	NCU00883	NCU00883	NCU00883	hypothetical protein	99 UNCLASSIFIED PROTEINS	NULL	Non-secretory protein	F_Evol	N_Evol	N_Evol	6nc110_210	0
1nc550_290	NCU00884	NCU00884	NCU00884	related to wound-inducible protein AWI 31	32 CELL RESCUE, DEFENSE AND VIRULENCE_32.01 stress response_98 CLASSIFICATION NOT YET CLEAR-CUT	;Semialdhyde_dh;Epimerase;3Beta_HSD;	Non-secretory protein	E_Evol	E_Evol	E_Evol		0
1nc550_300	NCU00885	NCU00885	NCU00885	hypothetical protein	99 UNCLASSIFIED PROTEINS	;Orthopox_C10L;	Non-secretory protein	N_Evol	N_Evol	N_Evol		0
1nc550_320	NCU00887	NCU00887	NCU00887	hypothetical protein	99 UNCLASSIFIED PROTEINS	NULL	Non-secretory protein	N_Evol	N_Evol	N_Evol		0
1nc550_360	NCU00890	NCU00890	NCU00890	related to beta-mannosidase	01 METABOLISM_01.05 C-compound and carbohydrate metabolism_01.05.03 polysaccharide metabolism	;Glyco_hydro_2_N;Glyco_hydro_2;	Non-secretory protein	E_Evol	E_Evol	E_Evol		0
1nc550_370	NCU00891	NCU00891	NCU00891	probable xylitol dehydrogenase	01 METABOLISM_01.05 C-compound and carbohydrate metabolism_16 PROTEIN WITH BINDING FUNCTION OR COFACTOR REQUIREMENT (structural or catalytic)_16.17 metal binding_16.17.09 heavy metal binding (Cu, Fe, Zn)	;ADH_N;AlaDh_PNT_C;FtsJ;ADH_zinc_N;Pyr_redox;Methyltransf_11;	Non-secretory protein	E_Evol	E_Evol	E_Evol		0
b13c5_220	NCU00892	NCU00892	NCU00892	tetrahydrofolylpolyglutamate synthase (met6+)	01 METABOLISM_01.07 metabolism of vitamins, cofactors, and prosthetic groups_01.07.01 biosynthesis of vitamins, cofactors, and prosthetic groups_70 SUBCELLULAR LOCALIZATION_70.03 cytoplasm_70.16 mitochondrion	NULL	Non-secretory protein	E_Evol	E_Evol	E_Evol		0
b13c5_210	NCU00893	NCU00893	NCU00893	related to folylpolyglutamate synthetase	01 METABOLISM_01.07 metabolism of vitamins, cofactors, and prosthetic groups_70 SUBCELLULAR LOCALIZATION_70.16 mitochondrion	;Mur_ligase_M;Mur_ligase_C;	Non-secretory protein	E_Evol	E_Evol	B_Evol		0
b13c5_200	NCU00894	NCU00894	NCU00894	conserved hypothetical protein	99 UNCLASSIFIED PROTEINS	;DUF632;SF-assemblin;	Non-secretory protein	B_Evol	B_Evol	F_Evol		0
b13c5_190	NCU00895	NCU00895	NCU00895	probable GTP-binding protein ypt5	14 PROTEIN FATE (folding, modification, destination)_14.04 protein targeting, sorting and translocation_16 PROTEIN WITH BINDING FUNCTION OR COFACTOR REQUIREMENT (structural or catalytic)_16.19 nucleotide/nucleoside/nucleobase binding_16.19.05 GTP binding_20 CELLULAR TRANSPORT, TRANSPORT FACILITIES AND TRANSPORT ROUTES_20.09 transport routes_20.09.13 vacuolar/lysosomal transport_20.09.18 cellular …	;Arf;MMR_HSR1;Miro;Ras;GTP_EFTU;	Non-secretory protein	E_Evol	E_Evol	E_Evol		0
b13c5_180	NCU00896	NCU00896	NCU00896	related to SAC1 protein	20 CELLULAR TRANSPORT, TRANSPORT FACILITIES AND TRANSPORT ROUTES_20.09 transport routes_20.09.07 vesicular transport (Golgi network, etc.)_20.09.16 cellular export and secretion_20.09.16.09 vesicular cellular export_20.09.16.09.03 exocytosis	;Syja_N;	Non-secretory protein	E_Evol	E_Evol	B_Evol		0
b13c5_170	NCU00897	NCU00897	NCU00897	related to SIN3 protein-binding protein STB2	11 TRANSCRIPTION_11.02 RNA synthesis_11.02.03 mRNA synthesis_11.02.03.04 transcriptional control	;PG_binding_1;ATG16;	Non-secretory protein	F_Evol	F_Evol	F_Evol		0
b13c5_160	NCU00898	NCU00898	NCU00898	conserved hypothetical protein	99 UNCLASSIFIED PROTEINS	;LisH;zf-C3HC4;	Non-secretory protein	E_Evol	E_Evol	F_Evol		0
b13c5_150	NCU00899	NCU00899	NCU00899	conserved hypothetical protein	99 UNCLASSIFIED PROTEINS	;Herpes_glycop;Flp_Fap;	Non-secretory protein	B_Evol	B_Evol	F_Evol		0
b13c5_140	NCU00900	NCU00900	NCU00900	hypothetical protein	99 UNCLASSIFIED PROTEINS	;PPP4R2;	Non-secretory protein	F_Evol	F_Evol	F_Evol		0
b13c5_130	NCU00901	NCU00901	NCU00901	RAD50 homolog uvs-6	10 CELL CYCLE AND DNA PROCESSING_10.01 DNA processing_10.01.05 DNA recombination and DNA repair_10.03 cell cycle_10.03.02 meiosis	;SMC_N;IncA;MAP7;Myosin_tail_1;Filament;DHC_N1;Rab5-bind;BRE1;DUF536;Tektin;Prefoldin_2;Gag_p24;Cgr1;DUF615;MFAP1_C;Rad50_zn_hook;Snf7;DUF593;ABC_tran;DUF536;K-box;	Non-secretory protein	E_Evol	E_Evol	F_Evol		0
b13c5_120	NCU00902	NCU00902	NCU00902	zinc finger protein white collar 2 (wc-2)	11 TRANSCRIPTION_11.02 RNA synthesis_11.02.03 mRNA synthesis_11.02.03.04 transcriptional control	;ATP-synt_C;SpoIIE;PAS_4;PAS_3;GATA;	Non-secretory protein	B_Evol	F_Evol	F_Evol		0
b13c5_110	NCU00903	NCU00903	NCU00903	putative protein	99 UNCLASSIFIED PROTEINS	;GRP;	Non-secretory protein	B_Evol	B_Evol	B_Evol		0
b13c5_100	NCU00904	NCU00904	NCU00904	probable D-lactate dehydrogenase (cytochrome)	01 METABOLISM_01.05 C-compound and carbohydrate metabolism_02 ENERGY_02.13 respiration	;FAD_binding_4;FAD-oxidase_C;	Non-secretory protein	E_Evol	E_Evol	E_Evol		0
b13c5_090	NCU00905	NCU00905	NCU00905	related to amidase	01 METABOLISM_01.02 nitrogen, sulfur and selenium metabolism	;Amidase;	Non-secretory protein	E_Evol	O_Evol	F_Evol		0
b13c5_080	NCU00906	NCU00906	NCU00906	hypothetical protein	99 UNCLASSIFIED PROTEINS	;NUP50;Cgr1;	Non-secretory protein	F_Evol	F_Evol	F_Evol		0
b13c5_070	NCU00907	NCU00907	NCU00907	hypothetical protein	99 UNCLASSIFIED PROTEINS	NULL	Non-secretory protein	N_Evol	N_Evol	N_Evol		0
b13c5_060	NCU00911	NCU00911	NCU00911	putative protein	99 UNCLASSIFIED PROTEINS	NULL	Non-secretory protein	B_Evol	B_Evol	F_Evol		0
b13c5_050	NCU00912	NCU00912	NCU00912	hypothetical protein	99 UNCLASSIFIED PROTEINS	NULL	Non-secretory protein	F_Evol	F_Evol	F_Evol		0
b13c5_030	NCU00914	NCU00914	NCU00914	related to ser/thr protein kinase KIN4	14 PROTEIN FATE (folding, modification, destination)_14.07 protein modification_14.07.03 modification by phosphorylation, dephosphorylation, autophosphorylation_30 CELLULAR COMMUNICATION/SIGNAL TRANSDUCTION MECHANISM_30.01 cellular signalling	;APH;Pkinase;Pkinase_Tyr;	Non-secretory protein	B_Evol	F_Evol	F_Evol		0
b13c5_020	NCU00915	NCU00915	NCU00915	related to aspartate--tRNA ligase	12 PROTEIN SYNTHESIS_12.10 aminoacyl-tRNA-synthetases	;tRNA_anti;tRNA-synt_2;tRNA-synt_2b;	Non-secretory protein	E_Evol	E_Evol	E_Evol		0
b13c5_010	NCU00916	NCU00916	NCU00916	putative protein	99 UNCLASSIFIED PROTEINS	;HPC2;CitMHS;EI24;MVIN;PHO4;Cytochrom_B561;MFS_1;Na_Ca_ex;UPF0005;DUF755;AA_permease_N;Na_Ca_ex;	Non-secretory protein	B_Evol	F_Evol	F_Evol		0
g17b7_160	NCU00917	NCU00917	NCU00917	putative protein	99 UNCLASSIFIED PROTEINS	;Myc_N;BUD22;eIF3_subunit;AT_hook;	Non-secretory protein	F_Evol	F_Evol	N_Evol		0
g17b7_150	NCU00918	NCU00918	NCU00918	putative protein	99 UNCLASSIFIED PROTEINS	;Extensin_2;	Non-secretory protein	F_Evol	F_Evol	F_Evol		0
g17b7_140	NCU00919	NCU00919	NCU00919	related to ATP-dependent RNA helicase ROK1	11 TRANSCRIPTION_11.02 RNA synthesis_11.02.01 rRNA synthesis_11.04 RNA processing_11.04.01 rRNA processing	;DEAD;ResIII;EBV-NA1;Helicase_C;	Non-secretory protein	E_Evol	B_Evol	F_Evol		0
g17b7_130	NCU00920	NCU00920	NCU00920	related to isoleucine--tRNA ligase	12 PROTEIN SYNTHESIS_12.10 aminoacyl-tRNA-synthetases	;tRNA-synt_1;tRNA-synt_1g;Anticodon_1;zf-FPG_IleRS;	Non-secretory protein	E_Evol	E_Evol	E_Evol		0
g17b7_120	NCU00921	NCU00921	NCU00921	putative protein	99 UNCLASSIFIED PROTEINS	;DUF1770;HABP4_PAI-RBP1;	Non-secretory protein	F_Evol	F_Evol	F_Evol		0
g17b7_110	NCU00922	NCU00922	NCU00922	hypothetical protein	99 UNCLASSIFIED PROTEINS	NULL	Non-secretory protein	N_Evol	N_Evol	N_Evol		0
g17b7_090	NCU00923	NCU00923	NCU00923	putative protein	99 UNCLASSIFIED PROTEINS	NULL	Non-secretory protein	F_Evol	F_Evol	F_Evol		0
g17b7_070	NCU00925	NCU00925	NCU00925	related to pescadillo development protein	11 TRANSCRIPTION_11.02 RNA synthesis_11.02.01 rRNA synthesis_11.04 RNA processing_11.04.01 rRNA processing	;Pescadillo_N;BRCT;Nucleoplasmin;MAP7;Upf2;	Non-secretory protein	E_Evol	E_Evol	E_Evol		0
g17b7_060	NCU00926	NCU00926	NCU00926	hypothetical protein	99 UNCLASSIFIED PROTEINS	;GA;zf-C2H2;	Non-secretory protein	F_Evol	F_Evol	F_Evol		0
g17b7_050	NCU00927	NCU00927	NCU00927	probable kinesin-related protein bimC	10 CELL CYCLE AND DNA PROCESSING_10.03 cell cycle_10.03.03 cytokinesis (cell division) /septum formation and hydrolysis_20 CELLULAR TRANSPORT, TRANSPORT FACILITIES AND TRANSPORT ROUTES_20.09 transport routes_20.09.14 cytoskeleton-dependent transport	;Kinesin;DHC_N1;PspA_IM30;Myosin_tail_1;LTXXQ;Cob_adeno_trans;ANTH;Tropomyosin;PLC-beta_C;STAT_alpha;M16C_assoc;Apolipoprotein;Prefoldin_2;DivIVA;	Non-secretory protein	E_Evol	E_Evol	F_Evol		0
g17b7_040	NCU00928	NCU00928	NCU00928	conserved hypothetical protein	99 UNCLASSIFIED PROTEINS	;UPF0183;	Non-secretory protein	F_Evol	F_Evol	F_Evol		0
g17b7_030	NCU00929	NCU00929	NCU00929	putative protein	99 UNCLASSIFIED PROTEINS	;Ribosomal_L32p;	Non-secretory protein	F_Evol	F_Evol	F_Evol		0
g17b7_020	NCU00930	NCU00930	NCU00930	mitochondrial import inner membrane translocase subunit TIM10 TIM-10	14 PROTEIN FATE (folding, modification, destination)_14.04 protein targeting, sorting and translocation_70 SUBCELLULAR LOCALIZATION_70.16 mitochondrion	;zf-Tim10_DDP;	Non-secretory protein	E_Evol	E_Evol	E_Evol		0
1nc551_010	NCU00932	NCU00932	NCU00932	hypothetical protein	99 UNCLASSIFIED PROTEINS	NULL	Non-secretory protein	N_Evol	N_Evol	N_Evol		0
1nc551_020	NCU00934	NCU00934	NCU00934	hypothetical protein	99 UNCLASSIFIED PROTEINS	NULL	Non-secretory protein	N_Evol	N_Evol	N_Evol		0
1nc551_030	NCU00935	NCU00935	NCU00935	putative protein	99 UNCLASSIFIED PROTEINS	;PH;Dehydrin;	Non-secretory protein	F_Evol	F_Evol	F_Evol		0
1nc551_040	NCU00936	NCU00936	NCU00936	related to succinate-semialdehyde dehydrogenase [NADP+]	01 METABOLISM_01.01 amino acid metabolism_01.01.03 assimilation of ammonia, metabolism of the glutamate group_01.01.03.02 metabolism of glutamate_32 CELL RESCUE, DEFENSE AND VIRULENCE_32.01 stress response	;Aldedh;Neocarzinostat;	Non-secretory protein	E_Evol	E_Evol	E_Evol		0
1nc551_050	NCU00937	NCU00937	NCU00937	conserved hypothetical protein	99 UNCLASSIFIED PROTEINS	;Glyco_hydro_79n;	Non-secretory protein	B_Evol	F_Evol	F_Evol		0
1nc551_060	NCU00938	NCU00938	NCU00938	putative protein	99 UNCLASSIFIED PROTEINS	;MARVEL;Bombesin;	Signal anchor	F_Evol	F_Evol	F_Evol		0
1nc551_070	NCU00939	NCU00939	NCU00939	conserved hypothetical protein	99 UNCLASSIFIED PROTEINS	;GAF;PAS;PAS_4;PAS_3;HisKA;HATPase_c;Response_reg;	Non-secretory protein	F_Evol	F_Evol	F_Evol		0
1nc551_080	NCU00940	NCU00940	NCU00940	questionable protein	99 UNCLASSIFIED PROTEINS	NULL	Non-secretory protein	N_Evol	N_Evol	N_Evol		0
1nc551_090	NCU00941	NCU00941	NCU00941	hypothetical protein	99 UNCLASSIFIED PROTEINS	NULL	Non-secretory protein	N_Evol	N_Evol	N_Evol		0
1nc549_020	NCU00943	NCU00943	NCU00943	probable trehalase precursor	01 METABOLISM_01.05 C-compound and carbohydrate metabolism_02 ENERGY_02.19 metabolism of energy reserves (e.g. glycogen, trehalose)_70 SUBCELLULAR LOCALIZATION_70.01 cell wall	;Trehalase;Ca_chan_IQ;	Signal peptide	E_Evol	E_Evol	B_Evol		0
1nc549_040	NCU00945	NCU00945	NCU00945	hypothetical protein	99 UNCLASSIFIED PROTEINS	;Fungal_trans;HisKA_2;	Non-secretory protein	F_Evol	F_Evol	F_Evol		0
1nc549_060	NCU00946	NCU00946	NCU00946	hypothetical protein	99 UNCLASSIFIED PROTEINS	NULL	Non-secretory protein	F_Evol	F_Evol	N_Evol		0
1nc549_080	NCU00948	NCU00948	NCU00948	questionable protein	99 UNCLASSIFIED PROTEINS	NULL	Non-secretory protein	N_Evol	N_Evol	N_Evol		0
1nc549_090	NCU00949	NCU00949	NCU00949	hypothetical protein	99 UNCLASSIFIED PROTEINS	;TP2;TolA;PRD;PspA_IM30;DREPP;	Non-secretory protein	N_Evol	N_Evol	N_Evol		0
b20j13_010	NCU00950	NCU00950	NCU00950	related to tRNA dihydrouridine synthase	01 METABOLISM_01.03 nucleotide/nucleoside/nucleobase metabolism_01.03.04 pyrimidine nucleotide/nucleoside/nucleobase metabolism_11 TRANSCRIPTION_11.06 RNA modification_11.06.02 tRNA modification	;Dus;	Non-secretory protein	E_Evol	B_Evol	B_Evol		0
b20j13_020	NCU00951	NCU00951	NCU00951	probable inorganic pyrophosphatase	01 METABOLISM_01.04 phosphate metabolism_70 SUBCELLULAR LOCALIZATION_70.03 cytoplasm	;Pyrophosphatase;	Non-secretory protein	E_Evol	E_Evol	E_Evol		0
b20j13_030	NCU00952	NCU00952	NCU00952	probable ribosomal protein YmL44, mitochondrial	12 PROTEIN SYNTHESIS_12.01 ribosome biogenesis_12.01.01 ribosomal proteins_70 SUBCELLULAR LOCALIZATION_70.16 mitochondrion	NULL	Non-secretory protein	A_Evol	A_Evol	A_Evol		0
b20j13_040	NCU00953	NCU00953	NCU00953	hypothetical protein	99 UNCLASSIFIED PROTEINS	;MAP7;DUF1502;Sec20;	Non-secretory protein	F_Evol	F_Evol	F_Evol		0
b20j13_050	NCU00954	NCU00954	NCU00954	related to ribosomal protein YmS2, mitochondrial	12 PROTEIN SYNTHESIS_12.01 ribosome biogenesis_12.01.01 ribosomal proteins_70 SUBCELLULAR LOCALIZATION_70.16 mitochondrion	;Abhydrolase_2;Abhydrolase_1;	Non-secretory protein	E_Evol	E_Evol	B_Evol		0
b20j13_060	NCU00955	NCU00955	NCU00955	related to steroid monooxygenase	01 METABOLISM_01.06 lipid, fatty acid and isoprenoid metabolism	;FMO-like;	Non-secretory protein	E_Evol	B_Evol	F_Evol		0
b20j13_070	NCU00956	NCU00956	NCU00956	conserved hypothetical protein	99 UNCLASSIFIED PROTEINS	NULL	Non-secretory protein	E_Evol	B_Evol	F_Evol		0
b20j13_080	NCU00957	NCU00957	NCU00957	related to extracellular matrix protein precursor	42 BIOGENESIS OF CELLULAR COMPONENTS_42.01 cell wall	NULL	Signal peptide	E_Evol	B_Evol	F_Evol		0
b20j13_090	NCU00958	NCU00958	NCU00958	conserved hypothetical protein	99 UNCLASSIFIED PROTEINS	;PP2C;SpoIIE;	Non-secretory protein	E_Evol	B_Evol	F_Evol		0
b20j13_100	NCU00959	NCU00959	NCU00959	probable succinate dehydrogenase (ubiquinone) iron-sulfur protein precursor	01 METABOLISM_01.05 C-compound and carbohydrate metabolism_02 ENERGY_02.10 tricarboxylic-acid pathway (citrate cycle, Krebs cycle, TCA cycle)_70 SUBCELLULAR LOCALIZATION_70.16 mitochondrion	;Fer2;	Non-secretory protein	E_Evol	E_Evol	E_Evol		0
b20j13_110	NCU00960	NCU00960	NCU00960	hypothetical protein	99 UNCLASSIFIED PROTEINS	NULL	Signal peptide	O_Evol	F_Evol	F_Evol		0
b20j13_120	NCU00961	NCU00961	NCU00961	hypothetical protein	99 UNCLASSIFIED PROTEINS	NULL	Non-secretory protein	N_Evol	N_Evol	N_Evol		0
b20j13_130	NCU00962	NCU00962	NCU00962	hypothetical protein	99 UNCLASSIFIED PROTEINS	;Extensin_2;SSDP;DUF1631;DUF1238;	Non-secretory protein	F_Evol	F_Evol	F_Evol		0
b20j13_140	NCU00963	NCU00963	NCU00963	probable methylenetetrahydrofolate dehydrogenase (NAD+)	01 METABOLISM_01.03 nucleotide/nucleoside/nucleobase metabolism_01.03.01 purin nucleotide/nucleoside/nucleobase metabolism	;THF_DHG_CYH;THF_DHG_CYH_C;	Non-secretory protein	E_Evol	E_Evol	E_Evol		0
b20j13_150	NCU00964	NCU00964	NCU00964	conserved hypothetical protein	99 UNCLASSIFIED PROTEINS	NULL	Non-secretory protein	F_Evol	F_Evol	F_Evol		0
b20j13_160	NCU00965	NCU00965	NCU00965	related to signal peptidase 18 KD subunit	14 PROTEIN FATE (folding, modification, destination)_14.07 protein modification_14.07.11 protein processing (proteolytic)	;SPC25;IF2_N;	Non-secretory protein	F_Evol	F_Evol	F_Evol		0
b20j13_170	NCU00966	NCU00966	NCU00966	conserved hypothetical protein	99 UNCLASSIFIED PROTEINS	;DUF850;DUF841;	Non-secretory protein	E_Evol	E_Evol	E_Evol		0
b20j13_180	NCU00967	NCU00967	NCU00967	putative protein	99 UNCLASSIFIED PROTEINS	;Rad54_N;MAP7;zf-CCCH;	Non-secretory protein	F_Evol	F_Evol	F_Evol		0
b20j13_190	NCU00968	NCU00968	NCU00968	related to SLS1 protein precursor	14 PROTEIN FATE (folding, modification, destination)_14.04 protein targeting, sorting and translocation_70 SUBCELLULAR LOCALIZATION_70.07 endoplasmic reticulum	NULL	Signal peptide	F_Evol	F_Evol	F_Evol		0
b20j13_200	NCU00969	NCU00969	NCU00969	NADH dehydrogenase 17.8K chain	02 ENERGY_02.11 electron transport and membrane-associated energy conservation_02.13 respiration_02.13.03 aerobic respiration_70 SUBCELLULAR LOCALIZATION_70.16 mitochondrion	NULL	Non-secretory protein	F_Evol	F_Evol	F_Evol		0
b20j13_220	NCU00971	NCU00971	NCU00971	probable ribosomal protein S12, cytosolic	12 PROTEIN SYNTHESIS_12.01 ribosome biogenesis_12.01.01 ribosomal proteins_70 SUBCELLULAR LOCALIZATION_70.03 cytoplasm	;Ribosomal_S19;	Non-secretory protein	E_Evol	E_Evol	E_Evol		0
b20j13_240	NCU00973	NCU00973	NCU00973	related to toxD protein	01 METABOLISM_01.05 C-compound and carbohydrate metabolism_32 CELL RESCUE, DEFENSE AND VIRULENCE_32.05 disease, virulence and defense_32.05.05 virulence, disease factors	;ADH_N;YjeF_N;ADH_zinc_N;Flavoprotein;	Non-secretory protein	B_Evol	B_Evol	F_Evol		0
b20j13_250	NCU00974	NCU00974	NCU00974	related to glutaredoxin	32 CELL RESCUE, DEFENSE AND VIRULENCE_32.07 detoxification_32.07.03 detoxification by modification	;DUF584;Glutaredoxin;	Signal peptide	B_Evol	B_Evol	F_Evol		0
b20j13_260	NCU00975	NCU00975	NCU00975	hypothetical protein	99 UNCLASSIFIED PROTEINS	NULL	Non-secretory protein	N_Evol	N_Evol	N_Evol		0
b20j13_270	NCU00976	NCU00976	NCU00976	hypothetical protein	99 UNCLASSIFIED PROTEINS	NULL	Non-secretory protein	N_Evol	N_Evol	N_Evol		0
b20j13_280	NCU00977	NCU00977	NCU00977	related to ribosomal protein YmL49, mitochondrial	12 PROTEIN SYNTHESIS_12.01 ribosome biogenesis_12.01.01 ribosomal proteins_70 SUBCELLULAR LOCALIZATION_70.16 mitochondrion	;Ribosomal_L21p;	Non-secretory protein	O_Evol	F_Evol	F_Evol		0
b20j13_290	NCU00978	NCU00978	NCU00978	related to protein kinase RPK1	10 CELL CYCLE AND DNA PROCESSING_10.03 cell cycle_10.03.01 mitotic cell cycle and cell cycle control_14 PROTEIN FATE (folding, modification, destination)_14.07 protein modification_14.07.03 modification by phosphorylation, dephosphorylation, autophosphorylation_30 CELLULAR COMMUNICATION/SIGNAL TRANSDUCTION MECHANISM_30.01 cellular signalling	;RFX1_trans_act;PepSY;Choline_kinase;Pkinase;Pkinase_Tyr;RIO1;	Non-secretory protein	B_Evol	F_Evol	F_Evol		0
b20j13_300	NCU00979	NCU00979	NCU00979	probable ribosomal protein P2	12 PROTEIN SYNTHESIS_12.01 ribosome biogenesis_12.01.01 ribosomal proteins	;Ribosomal_60s;	Signal peptide	E_Evol	E_Evol	E_Evol		0
b20j13_310	NCU00980	NCU00980	NCU00980	hypothetical protein	99 UNCLASSIFIED PROTEINS	;HPC2;SPT2;	Non-secretory protein	F_Evol	F_Evol	F_Evol		0
b20j13_320	NCU00981	NCU00981	NCU00981	conserved hypothetical protein	99 UNCLASSIFIED PROTEINS	;Ribosomal_S8e;	Non-secretory protein	E_Evol	E_Evol	E_Evol		0
b20j13_330	NCU00983	NCU00983	NCU00983	conserved hypothetical protein	99 UNCLASSIFIED PROTEINS	;PAP2;	Non-secretory protein	B_Evol	B_Evol	F_Evol		0
b20j13_340	NCU00984	NCU00984	NCU00984	hypothetical protein	99 UNCLASSIFIED PROTEINS	;VIT;Peptidase_C57;DUF1448;VWA;Extensin_2;Drf_FH1;	Non-secretory protein	E_Evol	O_Evol	F_Evol		0
b20j13_350	NCU00985	NCU00985	NCU00985	conserved hypothetical protein	99 UNCLASSIFIED PROTEINS	;Glyco_hydro_2_N;Glyco_hydro_2;Glyco_hydro_2_C;	Signal peptide	E_Evol	E_Evol	E_Evol		0
b20j13_360	NCU00986	NCU00986	NCU00986	conserved hypothetical protein	99 UNCLASSIFIED PROTEINS	NULL	Non-secretory protein	F_Evol	F_Evol	F_Evol		0
1nc548_010	NCU00987	NCU00987	NCU00987	related to pisatin demethylase	32 CELL RESCUE, DEFENSE AND VIRULENCE_32.07 detoxification	;p450;	Non-secretory protein	E_Evol	F_Evol	F_Evol		0
1nc548_020	NCU00988	NCU00988	NCU00988	related to quinate transport protein	20 CELLULAR TRANSPORT, TRANSPORT FACILITIES AND TRANSPORT ROUTES_20.01 transported compounds (substrates)_20.01.03 C-compound and carbohydrate transport	;C4dic_mal_tran;Sugar_tr;MFS_1;BT1;7TMR-DISM_7TM;	Non-secretory protein	E_Evol	E_Evol	B_Evol		0
1nc548_030	NCU00989	NCU00989	NCU00989	hypothetical protein	99 UNCLASSIFIED PROTEINS	NULL	Non-secretory protein	N_Evol	N_Evol	N_Evol		0
1nc548_040	NCU00990	NCU00990	NCU00990	hypothetical protein	99 UNCLASSIFIED PROTEINS	NULL	Non-secretory protein	E_Evol	B_Evol	F_Evol		0
1nc548_050	NCU00992	NCU00992	NCU00992	hypothetical protein	99 UNCLASSIFIED PROTEINS	NULL	Non-secretory protein	N_Evol	N_Evol	N_Evol		0
1nc548_080	NCU00995	NCU00995	NCU00995	putative protein	99 UNCLASSIFIED PROTEINS	NULL	Signal peptide	F_Evol	N_Evol	N_Evol		0
1nc548_090	NCU00996	NCU00996	NCU00996	conserved hypothetical protein	99 UNCLASSIFIED PROTEINS	;DDE;	Non-secretory protein	N_Evol	N_Evol	N_Evol		0
b11o8_160	NCU01000	NCU01000	NCU01000	conserved hypothetical protein	99 UNCLASSIFIED PROTEINS	;Peptidase_S15;PepX_C;	Non-secretory protein	E_Evol	E_Evol	E_Evol		0
b11o8_130	NCU01003	NCU01003	NCU01003	hypothetical protein	99 UNCLASSIFIED PROTEINS	NULL	Non-secretory protein	N_Evol	N_Evol	N_Evol		0
b11o8_090	NCU01007	NCU01007	NCU01007	conserved hypothetical protein	99 UNCLASSIFIED PROTEINS	;Ribosomal_S18;	Non-secretory protein	F_Evol	F_Evol	F_Evol		0
b11o8_080	NCU01008	NCU01008	NCU01008	probable IMP3 (component of the U3 small nucleolar ribonucleoprotein)	11 TRANSCRIPTION_11.02 RNA synthesis_11.02.01 rRNA synthesis_11.04 RNA processing_11.04.01 rRNA processing	;Ribosomal_S4;S4;	Non-secretory protein	E_Evol	E_Evol	E_Evol		0
b11o8_060	NCU01010	NCU01010	NCU01010	related to protein-tyrosine phosphatase	14 PROTEIN FATE (folding, modification, destination)_14.07 protein modification_14.07.03 modification by phosphorylation, dephosphorylation, autophosphorylation	NULL	Non-secretory protein	E_Evol	B_Evol	F_Evol		0
b11o8_050	NCU01011	NCU01011	NCU01011	hypothetical protein	99 UNCLASSIFIED PROTEINS	NULL	Non-secretory protein	F_Evol	F_Evol	F_Evol		0
b11o8_040	NCU01012	NCU01012	NCU01012	hypothetical protein	99 UNCLASSIFIED PROTEINS	NULL	Non-secretory protein	F_Evol	F_Evol	N_Evol		0
b11o8_020	NCU01014	NCU01014	NCU01014	related to hard surface induced protein 3 (chip3)	32 CELL RESCUE, DEFENSE AND VIRULENCE_32.05 disease, virulence and defense	;Acyl_transf_3;MFS_1;	Non-secretory protein	F_Evol	F_Evol	F_Evol		0
1a9_250	NCU01016	NCU01016	NCU01016	hypothetical protein	99 UNCLASSIFIED PROTEINS	;cwf18;	Non-secretory protein	E_Evol	F_Evol	F_Evol		0
1a9_240	NCU01017	NCU01017	NCU01017	hypothetical protein	99 UNCLASSIFIED PROTEINS	NULL	Non-secretory protein	B_Evol	B_Evol	F_Evol		0
1a9_220	NCU01019	NCU01019	NCU01019	conserved hypothetical protein	99 UNCLASSIFIED PROTEINS	;PSD4;R3H;PT;	Non-secretory protein	F_Evol	F_Evol	F_Evol		0
1a9_200	NCU01021	NCU01021	NCU01021	related to translation initiation factor 3 (47 kDa subunit)	12 PROTEIN SYNTHESIS_12.04 translation	;Mov34;CesT;GRP;	Non-secretory protein	E_Evol	B_Evol	B_Evol		0
1a9_190	NCU01022	NCU01022	NCU01022	conserved hypothetical protein	99 UNCLASSIFIED PROTEINS	;DEAD;DUF1253;	Non-secretory protein	E_Evol	E_Evol	A_Evol		0
1a9_180	NCU01023	NCU01023	NCU01023	related to mitochondrial ribosomal protein YmL8	12 PROTEIN SYNTHESIS_12.01 ribosome biogenesis_70 SUBCELLULAR LOCALIZATION_70.16 mitochondrion	;Ribosomal_L17;	Non-secretory protein	E_Evol	E_Evol	A_Evol		0
1a9_170	NCU01024	NCU01024	NCU01024	hypothetical protein	99 UNCLASSIFIED PROTEINS	;MAP7;	Non-secretory protein	F_Evol	F_Evol	F_Evol		0
1a9_160	NCU01025	NCU01025	NCU01025	hypothetical protein	99 UNCLASSIFIED PROTEINS	NULL	Signal peptide	F_Evol	F_Evol	N_Evol		0
1a9_150	NCU01026	NCU01026	NCU01026	hypothetical protein	99 UNCLASSIFIED PROTEINS	NULL	Non-secretory protein	N_Evol	N_Evol	N_Evol		0
1a9_140	NCU01027	NCU01027	NCU01027	putative protein	99 UNCLASSIFIED PROTEINS	NULL	Non-secretory protein	N_Evol	N_Evol	N_Evol		0
1a9_100	NCU01032	NCU01032	NCU01032	hypothetical protein	99 UNCLASSIFIED PROTEINS	NULL	Non-secretory protein	F_Evol	N_Evol	N_Evol		0
1a9_090	NCU01033	NCU01033	NCU01033	related to regulatory protein wetA	11 TRANSCRIPTION_11.02 RNA synthesis_11.02.03 mRNA synthesis_11.02.03.04 transcriptional control	NULL	Non-secretory protein	F_Evol	F_Evol	N_Evol		0
1a9_060	NCU01036	NCU01036	NCU01036	calcium_related spray protein	34 INTERACTION WITH THE ENVIRONMENT_34.01 homeostasis_34.01.01 homeostasis of cations_34.01.01.01 homeostasis of metal ions (Na, K, Ca etc.)_40 CELL FATE_40.01 cell growth / morphogenesis	;TRP;7TMR-DISM_7TM;MASE1;	Signal peptide	A_Evol	F_Evol	F_Evol		0
1a9_050	NCU01038	NCU01038	NCU01038	conserved hypothetical protein	99 UNCLASSIFIED PROTEINS	;Beta-lactamase;	Signal peptide	F_Evol	F_Evol	F_Evol		0
1a9_040	NCU01039	NCU01039	NCU01039	hypothetical protein	99 UNCLASSIFIED PROTEINS	NULL	Non-secretory protein	F_Evol	N_Evol	N_Evol		0
1a9_010	NCU01042	NCU01042	NCU01042	hypothetical protein	99 UNCLASSIFIED PROTEINS	;MMR_HSR1;Miro;Ras;NACHT;TMP-TENI;	Non-secretory protein	N_Evol	N_Evol	N_Evol		0
g15g9_140	NCU01045	NCU01045	NCU01045	ribonuclease T1	01 METABOLISM_01.03 nucleotide/nucleoside/nucleobase metabolism_01.03.16 polynucleotide degradation_01.03.16.01 RNA degradation	;Ribonuclease;	Signal peptide	B_Evol	B_Evol	B_Evol		0
g15g9_130	NCU01046	NCU01046	NCU01046	hypothetical protein	99 UNCLASSIFIED PROTEINS	;DCP1;Swi5;	Non-secretory protein	N_Evol	N_Evol	N_Evol		0
g15g9_120	NCU01047	NCU01047	NCU01047	related to inositol polyphosphate 5-phosphatase ocrl-1	42 BIOGENESIS OF CELLULAR COMPONENTS_42.01 cell wall	;Exo_endo_phos;RhoGAP;	Non-secretory protein	F_Evol	F_Evol	F_Evol		0
g15g9_110	NCU01048	NCU01048	NCU01048	hypothetical protein	99 UNCLASSIFIED PROTEINS	NULL	Non-secretory protein	N_Evol	N_Evol	N_Evol		0
g15g9_100	NCU01049	NCU01049	NCU01049	related to TGF beta induced protein ig-h3 precursor	99 UNCLASSIFIED PROTEINS	;Fasciclin;Fasciclin;	Signal peptide	F_Evol	F_Evol	N_Evol		0
g15g9_090	NCU01050	NCU01050	NCU01050	related to cel1 protein precursor	01 METABOLISM_01.05 C-compound and carbohydrate metabolism_01.05.02 sugar, glucoside, polyol and carboxylate metabolism_01.05.02.07 sugar, glucoside, polyol and carboxylate catabolism	;Glyco_hydro_61;	Signal peptide	B_Evol	B_Evol	B_Evol		0
g15g9_080	NCU01051	NCU01051	NCU01051	hypothetical protein	99 UNCLASSIFIED PROTEINS	NULL	Signal anchor	B_Evol	F_Evol	F_Evol		0
g15g9_070	NCU01052	NCU01052	NCU01052	hypothetical protein	99 UNCLASSIFIED PROTEINS	;VirB;	Signal peptide	N_Evol	N_Evol	N_Evol		0
g15g9_060	NCU01053	NCU01053	NCU01053	hypothetical protein	99 UNCLASSIFIED PROTEINS	NULL	Non-secretory protein	F_Evol	F_Evol	F_Evol		0
g15g9_050	NCU01054	NCU01054	NCU01054	hypothetical protein	99 UNCLASSIFIED PROTEINS	;TFIIA_gamma_N;	Non-secretory protein	N_Evol	N_Evol	N_Evol		0
g15g9_030	NCU01056	NCU01056	NCU01056	hypothetical protein	99 UNCLASSIFIED PROTEINS	;DUF636;	Signal peptide	F_Evol	N_Evol	N_Evol	4nc455_090	0
g15g9_020	NCU01057	NCU01057	NCU01057	conserved hypothetical protein	99 UNCLASSIFIED PROTEINS	;TauD;	Non-secretory protein	E_Evol	E_Evol	B_Evol		0
g15g9_010	NCU01058	NCU01058	NCU01058	hypothetical protein	99 UNCLASSIFIED PROTEINS	NULL	Non-secretory protein	N_Evol	N_Evol	N_Evol		0
b14a6_310	NCU01059	NCU01059	NCU01059	probable class I alpha-mannosidase	01 METABOLISM_01.05 C-compound and carbohydrate metabolism	;Glyco_hydro_47;	Signal peptide	E_Evol	E_Evol	F_Evol		0
b14a6_300	NCU01060	NCU01060	NCU01060	hypothetical protein	99 UNCLASSIFIED PROTEINS	NULL	Non-secretory protein	F_Evol	F_Evol	N_Evol		0
b14a6_290	NCU01061	NCU01061	NCU01061	conserved hypothetical protein	99 UNCLASSIFIED PROTEINS	;DLH;Peptidase_S9;	Non-secretory protein	E_Evol	O_Evol	F_Evol		0
b14a6_260	NCU01063	NCU01063	NCU01063	conserved hypothetical protein	99 UNCLASSIFIED PROTEINS	NULL	Signal peptide	F_Evol	F_Evol	F_Evol		0
b14a6_250	NCU01064	NCU01064	NCU01064	related to conidiation protein con-6	98 CLASSIFICATION NOT YET CLEAR-CUT	NULL	Non-secretory protein	F_Evol	F_Evol	F_Evol		0
b14a6_240	NCU01065	NCU01065	NCU01065	probable ammonium transporter MEPa	20 CELLULAR TRANSPORT, TRANSPORT FACILITIES AND TRANSPORT ROUTES_20.01 transported compounds (substrates)_20.01.01 ion transport_20.01.01.01 cation transport (H+, Na+, K+, Ca2+ , NH4+, etc.)_20.03 transport facilities	;MFS_1;7TMR-DISM_7TM;Ammonium_transp;	Non-secretory protein	E_Evol	E_Evol	E_Evol		0
b14a6_230	NCU01066	NCU01066	NCU01066	L-amino-acid oxidase	01 METABOLISM_01.01 amino acid metabolism	;DAO;Amino_oxidase;	Signal peptide	F_Evol	F_Evol	F_Evol		0
b14a6_220	NCU01067	NCU01067	NCU01067	related to cyclin CCL1	11 TRANSCRIPTION_11.02 RNA synthesis_11.02.03 mRNA synthesis_11.02.03.04 transcriptional control	;Cyclin_N;	Non-secretory protein	B_Evol	F_Evol	F_Evol		0
b14a6_200	NCU01069	NCU01069	NCU01069	probable cytosceletal binding protein	20 CELLULAR TRANSPORT, TRANSPORT FACILITIES AND TRANSPORT ROUTES_20.09 transport routes_20.09.07 vesicular transport (Golgi network, etc.)_20.09.14 cytoskeleton-dependent transport	;Arfaptin;BAR;	Non-secretory protein	B_Evol	B_Evol	B_Evol		0
b14a6_190	NCU01070	NCU01070	NCU01070	related to aminoacyl-tRNA hydrolase	12 PROTEIN SYNTHESIS_12.04 translation	;Pept_tRNA_hydro;	Non-secretory protein	E_Evol	O_Evol	F_Evol		0
b14a6_180	NCU01071	NCU01071	NCU01071	hypothetical protein	99 UNCLASSIFIED PROTEINS	NULL	Non-secretory protein	O_Evol	O_Evol	O_Evol		0
b14a6_170	NCU01072	NCU01072	NCU01072	related to novobiocin biosynthesis protein novR	01 METABOLISM_01.20 secondary metabolism_01.20.01 metabolism of primary metabolic sugar derivatives_01.20.01.09 metabolism of aminoglycoside antibiotics	;Aldolase_II;	Non-secretory protein	E_Evol	E_Evol	E_Evol		0
b14a6_160	NCU01073	NCU01073	NCU01073	hypothetical protein	99 UNCLASSIFIED PROTEINS	NULL	Signal peptide	F_Evol	N_Evol	N_Evol		0
b14a6_150	NCU01074	NCU01074	NCU01074	hypothetical protein	99 UNCLASSIFIED PROTEINS	;bZIP_1;bZIP_2;	Non-secretory protein	F_Evol	F_Evol	F_Evol		0
b14a6_140	NCU01075	NCU01075	NCU01075	putative protein	99 UNCLASSIFIED PROTEINS	NULL	Non-secretory protein	N_Evol	N_Evol	N_Evol		0
b14a6_130	NCU01076	NCU01076	NCU01076	putative protein	99 UNCLASSIFIED PROTEINS	NULL	Signal peptide	F_Evol	F_Evol	N_Evol		0
b14a6_120	NCU01077	NCU01077	NCU01077	conserved hypothetical protein	99 UNCLASSIFIED PROTEINS	NULL	Non-secretory protein	N_Evol	N_Evol	N_Evol		0
b14a6_110	NCU01078	NCU01078	NCU01078	related to D-mandelate dehydrogenase	02 ENERGY_02.13 respiration	;2-Hacid_dh;2-Hacid_dh_C;3HCDH_N;NAD_binding_2;	Non-secretory protein	E_Evol	F_Evol	F_Evol		0
b14a6_100	NCU01079	NCU01079	NCU01079	hypothetical protein	99 UNCLASSIFIED PROTEINS	NULL	Non-secretory protein	N_Evol	N_Evol	N_Evol		0
b14a6_090	NCU01080	NCU01080	NCU01080	related to laminaripentaose-producing beta-1,3-glucanase	01 METABOLISM_01.05 C-compound and carbohydrate metabolism	;Extensin_2;	Non-secretory protein	O_Evol	O_Evol	F_Evol		0
b14a6_080	NCU01081	NCU01081	NCU01081	hypothetical protein	99 UNCLASSIFIED PROTEINS	NULL	Non-secretory protein	F_Evol	F_Evol	F_Evol		0
b14a6_070	NCU01082	NCU01082	NCU01082	conserved hypothetical protein	99 UNCLASSIFIED PROTEINS	;Extensin_2;	Non-secretory protein	N_Evol	N_Evol	N_Evol		0
b14a6_060	NCU01083	NCU01083	NCU01083	S-adenosylmethionine decarboxylase (spe-2) SPE-2	01 METABOLISM_01.01 amino acid metabolism_01.01.05 metabolism of urea cycle, creatine and polyamines_01.01.05.01 metabolism of polyamines_01.01.05.01.01 biosynthesis of polyamines_01.20 secondary metabolism_01.20.23 metabolism of secondary products derived from L-methionine	;SAM_decarbox;MNNL;	Non-secretory protein	E_Evol	E_Evol	B_Evol		0
b14a6_050	NCU01084	NCU01084	NCU01084	related to putative nucleotide binding protein (NUPB)	98 CLASSIFICATION NOT YET CLEAR-CUT	;CbiA;zf-C4_ClpX;DUF1610;	Non-secretory protein	E_Evol	E_Evol	E_Evol		0
b14a6_040	NCU01085	NCU01085	NCU01085	related to glucan 1,4-alpha-glucosidase	70 SUBCELLULAR LOCALIZATION_70.01 cell wall	;DUF1777;	Non-secretory protein	F_Evol	F_Evol	F_Evol		0
b14a6_020	NCU01087	NCU01087	NCU01087	hypothetical protein	99 UNCLASSIFIED PROTEINS	NULL	Non-secretory protein	N_Evol	N_Evol	N_Evol	g21b4_440	0
b14a6_010	NCU01088	NCU01088	NCU01088	putative protein	99 UNCLASSIFIED PROTEINS	NULL	Non-secretory protein	N_Evol	N_Evol	N_Evol		0
b13o8_220	NCU01089	NCU01089	NCU01089	hypothetical protein	99 UNCLASSIFIED PROTEINS	;DAO;Pyr_redox_2;Amino_oxidase;	Non-secretory protein	E_Evol	B_Evol	B_Evol		0
b13o8_210	NCU01090	NCU01090	NCU01090	related to 26s proteasome subunit p28	14 PROTEIN FATE (folding, modification, destination)_14.13 protein/peptide degradation	;F-box;Ank;Ank;Ank;Ank;Ank;	Non-secretory protein	N_Evol	N_Evol	N_Evol		0
b13o8_200	NCU01091	NCU01091	NCU01091	hypothetical protein	99 UNCLASSIFIED PROTEINS	;F-box;Ank;Ank;Ank;	Non-secretory protein	N_Evol	N_Evol	N_Evol		0
b13o8_180	NCU01092	NCU01092	NCU01092	related to L-2.3-butanediol dehydrogenase	02 ENERGY_02.16 fermentation_02.16.09 mixed acid and butanediol fermentation	;adh_short;KR;Epimerase;	Non-secretory protein	E_Evol	E_Evol	E_Evol		0
b13o8_170	NCU01093	NCU01093	NCU01093	conserved hypothetical protein	99 UNCLASSIFIED PROTEINS	;Metallophos;DUF870;	Non-secretory protein	B_Evol	F_Evol	F_Evol		0
b13o8_160	NCU01094	NCU01094	NCU01094	related to isoamyl alcohol oxidase	01 METABOLISM_01.05 C-compound and carbohydrate metabolism	;FAD_binding_4;BBE;	Signal peptide	E_Evol	B_Evol	B_Evol		0
b13o8_150	NCU01095	NCU01095	NCU01095	conserved hypothetical protein	99 UNCLASSIFIED PROTEINS	;Sugar_tr;MFS_1;	Non-secretory protein	E_Evol	B_Evol	F_Evol		0
b13o8_130	NCU01096	NCU01096	NCU01096	hypothetical protein	99 UNCLASSIFIED PROTEINS	NULL	Non-secretory protein	N_Evol	N_Evol	N_Evol		0
b13o8_110	NCU01098	NCU01098	NCU01098	hypothetical protein	99 UNCLASSIFIED PROTEINS	;Ank;Herpes_UL21;Ank;DUF1956;Ank;Ank;Ank;Ank;Ank;DUF1777;	Non-secretory protein	F_Evol	F_Evol	F_Evol		0
b13o8_100	NCU01099	NCU01099	NCU01099	related to ras-related GTPase rag	30 CELLULAR COMMUNICATION/SIGNAL TRANSDUCTION MECHANISM_30.01 cellular signalling_30.01.05 enzyme mediated signal transduction_30.01.05.05 G-protein mediated signal transduction_30.01.05.05.01 small GTPase mediated signal transduction	;Zeta_toxin;Arf;ABC_tran;MMR_HSR1;Miro;Ras;Septin;Gtr1_RagA;	Non-secretory protein	E_Evol	E_Evol	E_Evol		0
b13o8_090	NCU01100	NCU01100	NCU01100	related to potential regulatory subunit for Glc7p	02 ENERGY_02.19 metabolism of energy reserves (e.g. glycogen, trehalose)_10 CELL CYCLE AND DNA PROCESSING_10.03 cell cycle_10.03.01 mitotic cell cycle and cell cycle control_10.03.02 meiosis_12 PROTEIN SYNTHESIS_12.07 translational control_43 CELL TYPE DIFFERENTIATION_43.01 fungal/microorganismic cell type differentiation_43.01.03 fungal and other eukaryotic cell type differentiation_43.01.03.05 …	;SEP;UBX;	Non-secretory protein	E_Evol	E_Evol	F_Evol		0
b13o8_080	NCU01101	NCU01101	NCU01101	conserved hypothetical protein	99 UNCLASSIFIED PROTEINS	;TOM13;	Non-secretory protein	A_Evol	F_Evol	F_Evol		0
b13o8_070	NCU01102	NCU01102	NCU01102	related to cytochrome oxidase processing protein OXA1	20 CELLULAR TRANSPORT, TRANSPORT FACILITIES AND TRANSPORT ROUTES_20.09 transport routes_20.09.04 mitochondrial transport_70 SUBCELLULAR LOCALIZATION_70.16 mitochondrion	;60KD_IMP;SPT2;	Non-secretory protein	F_Evol	F_Evol	F_Evol		0
b13o8_060	NCU01103	NCU01103	NCU01103	conserved hypothetical protein	99 UNCLASSIFIED PROTEINS	;Pro_CA;	Non-secretory protein	E_Evol	E_Evol	E_Evol		0
b13o8_050	NCU01104	NCU01104	NCU01104	related to RNA helicase MSS116	11 TRANSCRIPTION_11.04 RNA processing_11.04.03 mRNA processing (splicing, 5'-, 3'-end processing)_11.04.03.01 splicing_70 SUBCELLULAR LOCALIZATION_70.16 mitochondrion	;ResIII;DEAD;Helicase_C;	Non-secretory protein	E_Evol	E_Evol	F_Evol		0
b13o8_040	NCU01105	NCU01105	NCU01105	conserved hypothetical protein	99 UNCLASSIFIED PROTEINS	;EHN;U79_P34;	Non-secretory protein	N_Evol	N_Evol	N_Evol		0
b13o8_030	NCU01106	NCU01106	NCU01106	conserved hypothetical protein	99 UNCLASSIFIED PROTEINS	;DAO;Amino_oxidase;	Non-secretory protein	B_Evol	F_Evol	F_Evol		0
b13o8_020	NCU01107	NCU01107	NCU01107	related to light induced alcohol dehydrogenase Bli-4	01 METABOLISM_01.05 C-compound and carbohydrate metabolism_42 BIOGENESIS OF CELLULAR COMPONENTS_42.16 mitochondrion	;adh_short;Pyr_redox;KR;Epimerase;	Non-secretory protein	E_Evol	E_Evol	B_Evol		0
b13o8_010	NCU01108	NCU01108	NCU01108	related to seed maturation protein pm25	98 CLASSIFICATION NOT YET CLEAR-CUT	;SMP;	Non-secretory protein	F_Evol	F_Evol	F_Evol		0
13e11_400	NCU01109	NCU01109	NCU01109	hypothetical protein	99 UNCLASSIFIED PROTEINS	NULL	Non-secretory protein	B_Evol	B_Evol	B_Evol		0
13e11_370	NCU01112	NCU01112	NCU01112	related to putative lipid binding protein TFS1	98 CLASSIFICATION NOT YET CLEAR-CUT	;PBP;	Signal peptide	E_Evol	F_Evol	F_Evol		0
13e11_360	NCU01113	NCU01113	NCU01113	hypothetical protein	99 UNCLASSIFIED PROTEINS	;Pkinase;	Non-secretory protein	F_Evol	N_Evol	N_Evol	xnc070_100	0
13e11_350	NCU01114	NCU01114	NCU01114	related to putative methyltransferase	98 CLASSIFICATION NOT YET CLEAR-CUT	;DUF858;Methyltransf_11;Methyltransf_12;	Non-secretory protein	E_Evol	E_Evol	E_Evol		0
13e11_340	NCU01115	NCU01115	NCU01115	related to tRNA-splicing endonuclease beta chain	11 TRANSCRIPTION_11.02 RNA synthesis_11.02.02 tRNA synthesis_11.04 RNA processing_11.04.02 tRNA processing	;tRNA_int_endo;	Non-secretory protein	B_Evol	F_Evol	F_Evol		0
13e11_330	NCU01116	NCU01116	NCU01116	hypothetical protein	99 UNCLASSIFIED PROTEINS	;Glycos_transf_2;	Non-secretory protein	E_Evol	B_Evol	F_Evol		0
13e11_310	NCU01118	NCU01118	NCU01118	related to SGT1 protein	98 CLASSIFICATION NOT YET CLEAR-CUT	;TPR_1;TPR_1;CS;SGS;	Non-secretory protein	F_Evol	F_Evol	F_Evol		0
13e11_300	NCU01119	NCU01119	NCU01119	related to lanosterol synthase	01 METABOLISM_01.06 lipid, fatty acid and isoprenoid metabolism	;Prenyltrans;Prenyltrans;Prenyltrans;	Non-secretory protein	E_Evol	E_Evol	E_Evol		0
13e11_290	NCU01120	NCU01120	NCU01120	related to meiotic recombination protein REC12	10 CELL CYCLE AND DNA PROCESSING_10.01 DNA processing_10.01.05 DNA recombination and DNA repair_10.03 cell cycle_10.03.02 meiosis	;TP6A_N;	Non-secretory protein	F_Evol	F_Evol	F_Evol		0
13e11_270	NCU01121	NCU01121	NCU01121	related to ankyrin repeat-containing YAR1	98 CLASSIFICATION NOT YET CLEAR-CUT	;Ank;Ank;Ank;	Non-secretory protein	E_Evol	B_Evol	F_Evol		0
13e11_260	NCU01122	NCU01122	NCU01122	related to C2H2 - zinc finger protein	98 CLASSIFICATION NOT YET CLEAR-CUT	;zf-C2HC_plant;zf-C2H2;zf-C2H2;	Non-secretory protein	F_Evol	F_Evol	F_Evol		0
13e11_250	NCU01123	NCU01123	NCU01123	related to 6-hydroxy-d-nicotine oxidase	98 CLASSIFICATION NOT YET CLEAR-CUT	;FAD_binding_4;BBE;	Signal peptide	E_Evol	B_Evol	F_Evol		0
13e11_230	NCU01124	NCU01124	NCU01124	hypothetical protein	99 UNCLASSIFIED PROTEINS	NULL	Non-secretory protein	F_Evol	N_Evol	N_Evol	7nc600_070	0
13e11_200	NCU01127	NCU01127	NCU01127	putative protein	99 UNCLASSIFIED PROTEINS	;DUF636;	Non-secretory protein	E_Evol	E_Evol	B_Evol		0
13e11_140	NCU01132	NCU01132	NCU01132	probable sugar transporter	20 CELLULAR TRANSPORT, TRANSPORT FACILITIES AND TRANSPORT ROUTES_20.01 transported compounds (substrates)_20.01.03 C-compound and carbohydrate transport_20.03 transport facilities	;Sugar_tr;MFS_1;Na_sulph_symp;COPI_assoc;RTA1;	Non-secretory protein	E_Evol	B_Evol	B_Evol		0
13e11_100	NCU01134	NCU01134	NCU01134	related to cytochrome p450	32 CELL RESCUE, DEFENSE AND VIRULENCE_32.07 detoxification	;p450;	Non-secretory protein	B_Evol	F_Evol	F_Evol		0
13e11_090	NCU01135	NCU01135	NCU01135	hypothetical protein	99 UNCLASSIFIED PROTEINS	NULL	Non-secretory protein	N_Evol	N_Evol	N_Evol		0
13e11_080	NCU01136	NCU01136	NCU01136	hypothetical protein	99 UNCLASSIFIED PROTEINS	NULL	Non-secretory protein	F_Evol	F_Evol	F_Evol		0
13e11_060	NCU01138	NCU01138	NCU01138	hypothetical protein	99 UNCLASSIFIED PROTEINS	;3HCDH_N;DapB_N;GFO_IDH_MocA;NmrA;Saccharop_dh;3Beta_HSD;	Non-secretory protein	F_Evol	F_Evol	F_Evol		0
13e11_040	NCU01140	NCU01140	NCU01140	related to mitochondrial nicotinamide nucleotide transhydrogenase	02 ENERGY_02.11 electron transport and membrane-associated energy conservation_02.11.05 accessory proteins of electron transport and membrane-associated energy conservation_02.13 respiration_70 SUBCELLULAR LOCALIZATION_70.16 mitochondrion	;AlaDh_PNT_N;NAS;2-Hacid_dh_C;AlaDh_PNT_C;Shikimate_DH;ADH_zinc_N;DAO;ABC2_membrane;MFS_1;CopD;UPF0005;CTP_transf_1;Competence;Voltage_CLC;PNTB;DUF1109;DUF1290;DUF554;Cob_adeno_trans;TPP_enzyme_M;	Non-secretory protein	E_Evol	E_Evol	E_Evol		0
13e11_030	NCU01141	NCU01141	NCU01141	probable phosphatidylglycerophosphate synthase PEL1	01 METABOLISM_01.01 amino acid metabolism_01.06 lipid, fatty acid and isoprenoid metabolism	;PLDc;PLDc;	Non-secretory protein	E_Evol	E_Evol	E_Evol		0
123a4_360	NCU01142	NCU01142	NCU01142	related to nadh-ubiquinone oxidoreductase subunit b17.2	20 CELLULAR TRANSPORT, TRANSPORT FACILITIES AND TRANSPORT ROUTES_20.01 transported compounds (substrates)_20.01.15 electron transport_20.03 transport facilities_70 SUBCELLULAR LOCALIZATION_70.16 mitochondrion	;NDUFA12;	Non-secretory protein	E_Evol	E_Evol	B_Evol		0
123a4_350	NCU01143	NCU01143	NCU01143	conserved hypothetical protein	99 UNCLASSIFIED PROTEINS	;Topoisom_I_N;UBA;UBA;RWD;ResIII;DEAD;UPF0052;Helicase_C;HA2;DUF1605;	Non-secretory protein	E_Evol	E_Evol	B_Evol		0
123a4_340	NCU01144	NCU01144	NCU01144	putative protein	99 UNCLASSIFIED PROTEINS	;Extensin_2;	Non-secretory protein	N_Evol	N_Evol	N_Evol		0
123a4_330	NCU01145	NCU01145	NCU01145	related to high mobility group protein i/y (hmga)	70 SUBCELLULAR LOCALIZATION_70.10 nucleus_70.10.03 chromosome	;AT_hook;AT_hook;AT_hook;AT_hook;AT_hook;	Non-secretory protein	F_Evol	F_Evol	F_Evol		0
123a4_320	NCU01146	NCU01146	NCU01146	related to signal sequence receptor alpha chain	70 SUBCELLULAR LOCALIZATION_70.07 endoplasmic reticulum	;TRAP_alpha;	Signal peptide	E_Evol	F_Evol	F_Evol		0
123a4_310	NCU01147	NCU01147	NCU01147	related to L-2,4-diaminobutyrate decarboxylase	01 METABOLISM_01.20 secondary metabolism	;Pyridoxal_deC;Beta_elim_lyase;	Non-secretory protein	O_Evol	F_Evol	F_Evol		0
123a4_300	NCU01148	NCU01148	NCU01148	conserved hypothetical protein	99 UNCLASSIFIED PROTEINS	;Ubie_methyltran;MTS;Methyltransf_11;Methyltransf_12;	Non-secretory protein	F_Evol	F_Evol	F_Evol		0
123a4_290	NCU01149	NCU01149	NCU01149	conserved hypothetical protein	99 UNCLASSIFIED PROTEINS	;Cupin_5;	Non-secretory protein	B_Evol	F_Evol	F_Evol		0
123a4_280	NCU01150	NCU01150	NCU01150	conserved hypothetical protein	99 UNCLASSIFIED PROTEINS	;ArfGap;GATA;UBA;	Non-secretory protein	B_Evol	F_Evol	F_Evol		0
123a4_270	NCU01151	NCU01151	NCU01151	related to micromolar calcium activated neutral protease 1 (capn1)	14 PROTEIN FATE (folding, modification, destination)_14.13 protein/peptide degradation	;Peptidase_C2;NPIP;TolA;	Non-secretory protein	F_Evol	F_Evol	F_Evol		0
123a4_260	NCU01153	NCU01153	NCU01153	hypothetical protein	99 UNCLASSIFIED PROTEINS	NULL	Non-secretory protein	N_Evol	N_Evol	N_Evol		0
123a4_250	NCU01154	NCU01154	NCU01154	related to NsdD protein	98 CLASSIFICATION NOT YET CLEAR-CUT	;HPC2;Extensin_2;Drf_FH1;OMP_19;GATA;	Non-secretory protein	B_Evol	F_Evol	F_Evol		0
123a4_220	NCU01157	NCU01157	NCU01157	related to gamma-glutamylcysteine synthetase	01 METABOLISM_01.20 secondary metabolism_01.20.37 metabolism of peptide derived compounds_01.20.37.01 metabolism of thioredoxin, glutaredoxin, glutathion	;GCS;	Non-secretory protein	E_Evol	E_Evol	E_Evol		0
123a4_210	NCU01158	NCU01158	NCU01158	hypothetical protein	99 UNCLASSIFIED PROTEINS	;ATP1G1_PLM_MAT8;Extensin_2;Drf_FH1;	Non-secretory protein	F_Evol	F_Evol	F_Evol		0
123a4_200	NCU01160	NCU01160	NCU01160	probable RNA helicase DBP5	11 TRANSCRIPTION_20 CELLULAR TRANSPORT, TRANSPORT FACILITIES AND TRANSPORT ROUTES_20.01 transported compounds (substrates)_20.01.21 RNA transport_20.09 transport routes_20.09.01 nuclear transport	;ResIII;DEAD;Helicase_C;	Non-secretory protein	E_Evol	E_Evol	E_Evol		0
123a4_190	NCU01161	NCU01161	NCU01161	conserved hypothetical protein	99 UNCLASSIFIED PROTEINS	;FCH;Alb1;C1_1;C1_3;C1_2;DUF1610;zf-AN1;SH3_1;SH3_2;SH3_1;SH3_2;	Non-secretory protein	B_Evol	B_Evol	F_Evol		0
123a4_180	NCU01162	NCU01162	NCU01162	probable GEL1 protein	70 SUBCELLULAR LOCALIZATION_70.01 cell wall	;Glyco_hydro_72;Cellulase;	Signal peptide	E_Evol	A_Evol	A_Evol		0
123a4_170	NCU01163	NCU01163	NCU01163	conserved hypothetical protein	99 UNCLASSIFIED PROTEINS	;GAF;	Non-secretory protein	E_Evol	E_Evol	E_Evol		0
123a4_150	NCU01164	NCU01164	NCU01164	transcription elongation complex subunit (CDC68) CDC-68	10 CELL CYCLE AND DNA PROCESSING_10.03 cell cycle_11 TRANSCRIPTION_11.02 RNA synthesis_11.02.03 mRNA synthesis_11.02.03.01 general transcription activities	;Peptidase_M24;SPT16;SSrecog;Rtt106;	Non-secretory protein	E_Evol	E_Evol	E_Evol		0
123a4_140	NCU01165	NCU01165	NCU01165	related to cell division protein CDC50	10 CELL CYCLE AND DNA PROCESSING_10.03 cell cycle_10.03.01 mitotic cell cycle and cell cycle control	;CDC50;	Signal anchor	E_Evol	E_Evol	B_Evol		0
123a4_120	NCU01166	NCU01166	NCU01166	cAMP-dependent protein kinase regulatory subunit MCB	16 PROTEIN WITH BINDING FUNCTION OR COFACTOR REQUIREMENT (structural or catalytic)_16.19 nucleotide/nucleoside/nucleobase binding_16.19.01 cyclic nucleotide binding (cAMP, cGMP, etc.)_30 CELLULAR COMMUNICATION/SIGNAL TRANSDUCTION MECHANISM_30.01 cellular signalling_30.01.09 second messenger mediated signal transduction_30.01.09.07 cAMP/cGMP mediated signal transduction_40 CELL FATE_40.01 cell gro…	;cNMP_binding;cNMP_binding;	Non-secretory protein	E_Evol	E_Evol	E_Evol		0
123a4_110	NCU01167	NCU01167	NCU01167	conserved hypothetical protein	99 UNCLASSIFIED PROTEINS	;BCAS2;	Non-secretory protein	E_Evol	B_Evol	F_Evol		0
123a4_080	NCU01169	NCU01169	NCU01169	NADH-ubiquinone oxidoreductase 24 kDa subunit, mitochondrial precursor NUO-24	02 ENERGY_02.11 electron transport and membrane-associated energy conservation_20 CELLULAR TRANSPORT, TRANSPORT FACILITIES AND TRANSPORT ROUTES_20.01 transported compounds (substrates)_20.01.15 electron transport_20.03 transport facilities_70 SUBCELLULAR LOCALIZATION_70.16 mitochondrion	;Complex1_24kDa;	Non-secretory protein	E_Evol	E_Evol	E_Evol		0
123a4_070	NCU01170	NCU01170	NCU01170	conserved hypothetical protein	99 UNCLASSIFIED PROTEINS	;AMP-binding;	Non-secretory protein	F_Evol	F_Evol	F_Evol		0
123a4_060	NCU01171	NCU01171	NCU01171	probable cell division control protein nda4	10 CELL CYCLE AND DNA PROCESSING_10.01 DNA processing_10.01.03 DNA synthesis and replication_10.03 cell cycle_10.03.01 mitotic cell cycle and cell cycle control	;MCM;AAA;AAA_3;AAA_5;Mg_chelatase;GntR;	Non-secretory protein	E_Evol	E_Evol	E_Evol		0
123a4_050	NCU01172	NCU01172	NCU01172	conserved hypothetical protein	99 UNCLASSIFIED PROTEINS	;Vps54;	Non-secretory protein	B_Evol	F_Evol	F_Evol		0
123a4_040	NCU01173	NCU01173	NCU01173	related to dnase1 protein	01 METABOLISM_01.03 nucleotide/nucleoside/nucleobase metabolism_01.03.16 polynucleotide degradation_01.03.16.01 RNA degradation	NULL	Signal peptide	F_Evol	F_Evol	N_Evol		0
123a4_030	NCU01174	NCU01174	NCU01174	related to cell division control protein CDC23	10 CELL CYCLE AND DNA PROCESSING_10.03 cell cycle_10.03.01 mitotic cell cycle and cell cycle control	;APC8;TPR_2;TPR_1;TPR_2;TPR_1;TPR_2;TPR_1;TPR_2;TPR_1;TPR_2;TPR_1;TPR_2;TPR_1;TPR_2;	Non-secretory protein	E_Evol	E_Evol	A_Evol		0
123a4_020	NCU01175	NCU01175	NCU01175	farnesyl pyrophosphate synthetase FPPS	01 METABOLISM_01.06 lipid, fatty acid and isoprenoid metabolism_01.06.06 isoprenoid metabolism	;polyprenyl_synt;Iron_traffic;ACPS;	Non-secretory protein	E_Evol	E_Evol	E_Evol		0
123a4_010	NCU01176	NCU01176	NCU01176	hypothetical protein	99 UNCLASSIFIED PROTEINS	;PH;	Non-secretory protein	F_Evol	N_Evol	N_Evol		0
b10h4_170	NCU01177	NCU01177	NCU01177	related to methionine adenosyltransferase regulatory beta subunit	01 METABOLISM_01.01 amino acid metabolism	;adh_short;KR;RmlD_sub_bind;Epimerase;Polysacc_synt_2;3Beta_HSD;NAD_binding_4;	Non-secretory protein	E_Evol	E_Evol	E_Evol		0
b10h4_160	NCU01178	NCU01178	NCU01178	related to 6-phosphofructo-2-kinase/fructose-2,6-bisphosphate 2-phosphatase	01 METABOLISM_01.05 C-compound and carbohydrate metabolism	;6PF2K;PGAM;	Non-secretory protein	E_Evol	E_Evol	B_Evol		0
b10h4_150	NCU01179	NCU01179	NCU01179	mitochondrial import receptor subunit tom-40 (MOM38 protein) TOM-40	20 CELLULAR TRANSPORT, TRANSPORT FACILITIES AND TRANSPORT ROUTES_20.09 transport routes_20.09.04 mitochondrial transport_70 SUBCELLULAR LOCALIZATION_70.16 mitochondrion	;Porin_3;	Non-secretory protein	E_Evol	B_Evol	B_Evol		0
b10h4_140	NCU01180	NCU01180	NCU01180	hypothetical protein	99 UNCLASSIFIED PROTEINS	;UCH;	Non-secretory protein	F_Evol	F_Evol	F_Evol		0
b10h4_130	NCU01181	NCU01181	NCU01181	conserved hypothetical protein	99 UNCLASSIFIED PROTEINS	;Acyl-CoA_dh_N;Acyl-CoA_dh_M;Acyl-CoA_dh_1;Acyl-CoA_dh_2;	Non-secretory protein	E_Evol	E_Evol	E_Evol		0
b10h4_120	NCU01182	NCU01182	NCU01182	related to BNS1 protein	10 CELL CYCLE AND DNA PROCESSING_10.03 cell cycle_10.03.01 mitotic cell cycle and cell cycle control	;Spo12;	Non-secretory protein	B_Evol	F_Evol	F_Evol		0
b10h4_110	NCU01183	NCU01183	NCU01183	probable GTP-binding protein	16 PROTEIN WITH BINDING FUNCTION OR COFACTOR REQUIREMENT (structural or catalytic)_16.19 nucleotide/nucleoside/nucleobase binding_16.19.05 GTP binding_30 CELLULAR COMMUNICATION/SIGNAL TRANSDUCTION MECHANISM_30.01 cellular signalling	;MMR_HSR1;GTP_EFTU;Miro;Dynamin_N;TGS;	Non-secretory protein	E_Evol	E_Evol	E_Evol		0
b10h4_100	NCU01184	NCU01184	NCU01184	conserved hypothetical protein	99 UNCLASSIFIED PROTEINS	;zf-CCCH;RRM_1;	Non-secretory protein	E_Evol	B_Evol	B_Evol		0
b10h4_090	NCU01185	NCU01185	NCU01185	conserved hypothetical protein	99 UNCLASSIFIED PROTEINS	;UreF;	Non-secretory protein	E_Evol	F_Evol	F_Evol		0
b10h4_080	NCU01186	NCU01186	NCU01186	hypothetical protein	99 UNCLASSIFIED PROTEINS	;Sas10_Utp3;PspA_IM30;ATG16;KAR9;Pox_A_type_inc;Pox_A_type_inc;Pox_A_type_inc;LUC7;Pox_A_type_inc;SAB;Pox_A_type_inc;	Non-secretory protein	F_Evol	F_Evol	F_Evol		0
b10h4_070	NCU01187	NCU01187	NCU01187	cpc-3 protein CPC-3	12 PROTEIN SYNTHESIS_12.07 translational control_14 PROTEIN FATE (folding, modification, destination)_14.07 protein modification_14.07.03 modification by phosphorylation, dephosphorylation, autophosphorylation_70 SUBCELLULAR LOCALIZATION_70.03 cytoplasm	;RWD;Pkinase;Pkinase_Tyr;Cenp-B_dimeris;HGTP_anticodon;	Non-secretory protein	E_Evol	E_Evol	F_Evol		0
b10h4_050	NCU01189	NCU01189	NCU01189	hypothetical protein	99 UNCLASSIFIED PROTEINS	;UBA;UIM;	Non-secretory protein	F_Evol	F_Evol	F_Evol		0
b10h4_040	NCU01190	NCU01190	NCU01190	conserved hypothetical protein	99 UNCLASSIFIED PROTEINS	;DUF410;	Non-secretory protein	E_Evol	B_Evol	F_Evol		0
b10h4_030	NCU01191	NCU01191	NCU01191	hypothetical protein	99 UNCLASSIFIED PROTEINS	NULL	Non-secretory protein	N_Evol	N_Evol	N_Evol		0
b10h4_020	NCU01192	NCU01192	NCU01192	probable DNA-directed DNA polymerase III	10 CELL CYCLE AND DNA PROCESSING_10.01 DNA processing_10.01.03 DNA synthesis and replication_10.01.05 DNA recombination and DNA repair_10.01.05.01 DNA repair_70 SUBCELLULAR LOCALIZATION_70.10 nucleus	;DNA_pol_B_exo;DNA_pol_B;	Non-secretory protein	E_Evol	E_Evol	E_Evol		0
18f11_230	NCU01195	NCU01195	NCU01195	NADP-specific glutamate dehydrogenase GDH	01 METABOLISM_01.01 amino acid metabolism_01.01.03 assimilation of ammonia, metabolism of the glutamate group_01.01.03.01 metabolism of glutamine_01.01.03.01.02 degradation of glutamine_01.01.03.03 metabolism of proline_01.01.03.03.02 degradation of proline_01.01.03.05 metabolism of arginine_01.01.03.05.02 degradation of arginine_01.02 nitrogen, sulfur and selenium metabolism	;ELFV_dehydrog_N;ACP_syn_III_C;ELFV_dehydrog;CheY-binding;	Non-secretory protein	E_Evol	E_Evol	E_Evol		0
18f11_210	NCU01196	NCU01196	NCU01196	related to stress response protein rds1p	32 CELL RESCUE, DEFENSE AND VIRULENCE_32.01 stress response	NULL	Signal peptide	B_Evol	B_Evol	B_Evol		0
18f11_200	NCU01197	NCU01197	NCU01197	related to SSD1 protein	10 CELL CYCLE AND DNA PROCESSING_10.03 cell cycle_10.03.01 mitotic cell cycle and cell cycle control_40 CELL FATE_40.01 cell growth / morphogenesis	;OB_RNB;RNB;	Non-secretory protein	B_Evol	B_Evol	B_Evol		0
18f11_190	NCU01198	NCU01198	NCU01198	related to RNA export mediator GLE1	11 TRANSCRIPTION_20 CELLULAR TRANSPORT, TRANSPORT FACILITIES AND TRANSPORT ROUTES_20.01 transported compounds (substrates)_20.01.21 RNA transport_20.09 transport routes_20.09.01 nuclear transport	;MAP7;GLE1;	Non-secretory protein	F_Evol	F_Evol	F_Evol		0
18f11_160	NCU01201	NCU01201	NCU01201	conserved hypothetical protein	99 UNCLASSIFIED PROTEINS	;Trm112p;	Non-secretory protein	E_Evol	E_Evol	E_Evol		0
18f11_150	NCU01202	NCU01202	NCU01202	conserved hypothetical protein	99 UNCLASSIFIED PROTEINS	;BIG1;	Signal peptide	B_Evol	F_Evol	F_Evol		0
18f11_140	NCU01203	NCU01203	NCU01203	conserved hypothetical protein	99 UNCLASSIFIED PROTEINS	NULL	Non-secretory protein	E_Evol	B_Evol	F_Evol		0
18f11_130	NCU01204	NCU01204	NCU01204	related to tropomyosin TPM1	40 CELL FATE_40.01 cell growth / morphogenesis_43 CELL TYPE DIFFERENTIATION_43.01 fungal/microorganismic cell type differentiation_43.01.03 fungal and other eukaryotic cell type differentiation_43.01.03.05 budding, cell polarity and filament formation	;Tropomyosin;	Non-secretory protein	B_Evol	B_Evol	B_Evol		0
18f11_120	NCU01205	NCU01205	NCU01205	hypothetical protein	99 UNCLASSIFIED PROTEINS	NULL	Non-secretory protein	F_Evol	F_Evol	F_Evol		0
18f11_100	NCU01206	NCU01206	NCU01206	related to regulatory protein SET1	11 TRANSCRIPTION_11.02 RNA synthesis_11.02.03 mRNA synthesis_11.02.03.04 transcriptional control	;RRM_1;SET;	Non-secretory protein	B_Evol	F_Evol	F_Evol		0
18f11_090	NCU01207	NCU01207	NCU01207	H+-transporting ATPase, vacuolar, 67K chain VMA-1	20 CELLULAR TRANSPORT, TRANSPORT FACILITIES AND TRANSPORT ROUTES_20.01 transported compounds (substrates)_20.01.01 ion transport_20.01.01.01 cation transport (H+, Na+, K+, Ca2+ , NH4+, etc.)_20.03 transport facilities_20.03.22 transport ATPases_20.09 transport routes_20.09.13 vacuolar/lysosomal transport	;ATP-synt_ab_N;ATP-synt_ab;ATP-synt_ab_C;	Non-secretory protein	E_Evol	E_Evol	E_Evol		0
18f11_080	NCU01208	NCU01208	NCU01208	hypothetical protein	99 UNCLASSIFIED PROTEINS	;NUDE_C;	Non-secretory protein	F_Evol	F_Evol	F_Evol		0
18f11_070	NCU01209	NCU01209	NCU01209	hypothetical protein	99 UNCLASSIFIED PROTEINS	;Zn_clus;	Non-secretory protein	N_Evol	N_Evol	N_Evol		0
18f11_060	NCU01210	NCU01210	NCU01210	related to para-aminobenzoic acid synthetase	01 METABOLISM_01.07 metabolism of vitamins, cofactors, and prosthetic groups_01.07.01 biosynthesis of vitamins, cofactors, and prosthetic groups	;GATase;Peptidase_C26;GPS;Anth_synt_I_N;Chorismate_bind;	Non-secretory protein	E_Evol	E_Evol	B_Evol		0
18f11_050	NCU01211	NCU01211	NCU01211	conserved hypothetical protein	99 UNCLASSIFIED PROTEINS	;DUF1766;	Non-secretory protein	F_Evol	F_Evol	F_Evol		0
18f11_020	NCU01214	NCU01214	NCU01214	related to glucan 1,4-alpha-glucosidase	01 METABOLISM_01.05 C-compound and carbohydrate metabolism_70 SUBCELLULAR LOCALIZATION_70.27 extracellular / secretion proteins	;P-II;	Signal peptide	N_Evol	N_Evol	N_Evol		0
18f11_015	NCU01215	NCU01215	NCU01215	conserved hypothetical protein	99 UNCLASSIFIED PROTEINS	;4HBT;	Non-secretory protein	B_Evol	F_Evol	F_Evol		0
18f11_010	NCU01216	NCU01216	NCU01216	related to protein GRR1	01 METABOLISM_01.05 C-compound and carbohydrate metabolism_01.05.25 regulation of C-compound and carbohydrate metabolism_10 CELL CYCLE AND DNA PROCESSING_10.03 cell cycle_10.03.01 mitotic cell cycle and cell cycle control	;NB;F-box;Tna_leader;LRR_1;LRR_1;LRR_1;LRR_1;LRR_2;LRR_1;LRR_2;LRR_1;LRR_1;LRR_2;LRR_1;LRR_1;LRR_2;	Non-secretory protein	B_Evol	B_Evol	F_Evol		0
8d4_230	NCU01218	NCU01218	NCU01218	conserved hypothetical protein	99 UNCLASSIFIED PROTEINS	NULL	Non-secretory protein	F_Evol	F_Evol	F_Evol		0
8d4_220	NCU01219	NCU01219	NCU01219	probable glutaredoxin	32 CELL RESCUE, DEFENSE AND VIRULENCE_32.07 detoxification	;DUF836;Glutaredoxin;	Non-secretory protein	E_Evol	E_Evol	E_Evol		0
8d4_210	NCU01220	NCU01220	NCU01220	hypothetical protein	99 UNCLASSIFIED PROTEINS	;ubiquitin;BAG;	Non-secretory protein	F_Evol	F_Evol	F_Evol		0
8d4_200	NCU01221	NCU01221	NCU01221	probable ribosomal protein l13a	12 PROTEIN SYNTHESIS_12.01 ribosome biogenesis	;Ribosomal_L13;	Non-secretory protein	E_Evol	E_Evol	E_Evol		0
8d4_180	NCU01223	NCU01223	NCU01223	hypothetical protein	99 UNCLASSIFIED PROTEINS	NULL	Non-secretory protein	N_Evol	N_Evol	N_Evol		0
8d4_150	NCU01225	NCU01225	NCU01225	probable ubiquitin--protein ligase	14 PROTEIN FATE (folding, modification, destination)_14.07 protein modification_14.13 protein/peptide degradation	;UQ_con;UBA_3;	Non-secretory protein	E_Evol	E_Evol	E_Evol		0
8d4_130	NCU01227	NCU01227	NCU01227	probable atp-specific succinyl-coa synthetase alpha subunit	02 ENERGY_02.10 tricarboxylic-acid pathway (citrate cycle, Krebs cycle, TCA cycle)	;CoA_binding;GFO_IDH_MocA;Ligase_CoA;	Non-secretory protein	E_Evol	E_Evol	E_Evol		0
8d4_110	NCU01229	NCU01229	NCU01229	probable histone acetyltransferase	10 CELL CYCLE AND DNA PROCESSING_10.01 DNA processing_10.01.09 DNA restriction or modification_10.01.09.05 DNA conformation modification (e.g. chromatin)	;Radical_SAM;Acetyltransf_1;	Non-secretory protein	E_Evol	E_Evol	E_Evol		0
8d4_090	NCU01230	NCU01230	NCU01230	putative protein	99 UNCLASSIFIED PROTEINS	;Arylesterase;	Signal peptide	B_Evol	F_Evol	F_Evol		0
8d4_080	NCU01231	NCU01231	NCU01231	related to carboxylic acid transport protein JEN1	01 METABOLISM_01.05 C-compound and carbohydrate metabolism_20 CELLULAR TRANSPORT, TRANSPORT FACILITIES AND TRANSPORT ROUTES_20.01 transported compounds (substrates)_20.01.03 C-compound and carbohydrate transport_20.03 transport facilities	;Nuc_H_symport;LacY_symp;Sugar_tr;MFS_1;	Non-secretory protein	E_Evol	B_Evol	B_Evol		0
8d4_060	NCU01233	NCU01233	NCU01233	related to 2,5-diketo-D-gluconic acid reductase	98 CLASSIFICATION NOT YET CLEAR-CUT	;Aldo_ket_red;	Non-secretory protein	E_Evol	E_Evol	E_Evol		0
8d4_050	NCU01234	NCU01234	NCU01234	probable translation initiation factor eIF-4A	12 PROTEIN SYNTHESIS_12.04 translation	;ResIII;DEAD;Flavi_DEAD;Helicase_C;	Non-secretory protein	E_Evol	E_Evol	E_Evol		0
8d4_040	NCU01235	NCU01235	NCU01235	related to RNA splicing factor PRP9	11 TRANSCRIPTION_11.02 RNA synthesis_11.02.03 mRNA synthesis_11.04 RNA processing_11.04.03 mRNA processing (splicing, 5'-, 3'-end processing)_11.04.03.01 splicing	;zf-C2H2;RPAP1_N;zf-C2H2;	Non-secretory protein	E_Evol	E_Evol	E_Evol		0
8d4_030	NCU01236	NCU01236	NCU01236	conserved hypothetical protein	99 UNCLASSIFIED PROTEINS	;GIY-YIG;C1_3;zf-RING-like;	Non-secretory protein	B_Evol	F_Evol	F_Evol		0
3h10_130	NCU01238	NCU01238	NCU01238	related to regulator protein rum1	11 TRANSCRIPTION_11.02 RNA synthesis_11.02.03 mRNA synthesis_11.02.03.04 transcriptional control	;JmjN;ARID;BBE;C1_3;PHD;zf-RING-like;Rubredoxin;JmjC;zf-C5HC2;PLU-1;PHD;zf-CHY;	Non-secretory protein	E_Evol	B_Evol	F_Evol		0
3h10_120	NCU01240	NCU01240	NCU01240	conserved hypothetical protein	99 UNCLASSIFIED PROTEINS	;DUF1688;	Non-secretory protein	E_Evol	E_Evol	E_Evol		0
3h10_110	NCU01241	NCU01241	NCU01241	probable mitochondrial carrier protein ARALAR1	20 CELLULAR TRANSPORT, TRANSPORT FACILITIES AND TRANSPORT ROUTES_20.09 transport routes_20.09.04 mitochondrial transport_70 SUBCELLULAR LOCALIZATION_70.16 mitochondrion	;efhand;efhand;Mito_carr;Mito_carr;Mito_carr;	Non-secretory protein	E_Evol	E_Evol	E_Evol		0
3h10_100	NCU01242	NCU01242	NCU01242	related to cyclin B3	10 CELL CYCLE AND DNA PROCESSING_10.03 cell cycle_10.03.01 mitotic cell cycle and cell cycle control	;Cyclin_N;Cyclin_C;	Non-secretory protein	B_Evol	B_Evol	F_Evol		0
3h10_090	NCU01243	NCU01243	NCU01243	conserved hypothetical protein	99 UNCLASSIFIED PROTEINS	;Zn_clus;	Non-secretory protein	F_Evol	F_Evol	F_Evol		0
3h10_070	NCU01245	NCU01245	NCU01245	related to DNA-directed RNA polymerase III, 47 KD subunit	11 TRANSCRIPTION_11.02 RNA synthesis_11.02.02 tRNA synthesis	;GRP;RNA_pol_Rpc4;	Non-secretory protein	F_Evol	F_Evol	F_Evol		0
3h10_060	NCU01246	NCU01246	NCU01246	conserved hypothetical protein	99 UNCLASSIFIED PROTEINS	;UreD;	Non-secretory protein	E_Evol	E_Evol	F_Evol		0
3h10_050	NCU01247	NCU01247	NCU01247	related to nuclear protein SA-1	70 SUBCELLULAR LOCALIZATION_70.10 nucleus	;STAG;HEAT;HEAT;HEAT;S-antigen;	Non-secretory protein	F_Evol	F_Evol	F_Evol		0
3h10_040	NCU01248	NCU01248	NCU01248	conserved hypothetical protein	99 UNCLASSIFIED PROTEINS	;tRNA_anti;Telo_bind;	Non-secretory protein	F_Evol	F_Evol	F_Evol		0
3h10_030	NCU01249	NCU01249	NCU01249	probable importin alpha SRP1	14 PROTEIN FATE (folding, modification, destination)_14.04 protein targeting, sorting and translocation_20 CELLULAR TRANSPORT, TRANSPORT FACILITIES AND TRANSPORT ROUTES_20.09 transport routes_20.09.01 nuclear transport_42 BIOGENESIS OF CELLULAR COMPONENTS_42.10 nucleus	;IBB;DUF634;Arm;HEAT;HEAT_PBS;Arm;HEAT;HEAT_PBS;Arm;HEAT;Arm;HEAT;Arm;HEAT;Arm;HEAT;HEAT_PBS;Arm;HEAT;Arm;	Non-secretory protein	E_Evol	E_Evol	E_Evol		0
3h10_020	NCU01250	NCU01250	NCU01250	related to CTNS protein	98 CLASSIFICATION NOT YET CLEAR-CUT	;PQ-loop;PQ-loop;	Non-secretory protein	E_Evol	E_Evol	E_Evol		0
3h10_010	NCU01252	NCU01252	NCU01252	related to samB	11 TRANSCRIPTION_11.02 RNA synthesis_11.02.03 mRNA synthesis_11.02.03.04 transcriptional control	;zf-MYND;	Non-secretory protein	B_Evol	A_Evol	F_Evol		0
b10n12_110	NCU01253	NCU01253	NCU01253	putative protein	99 UNCLASSIFIED PROTEINS	NULL	Non-secretory protein	F_Evol	F_Evol	F_Evol		0
b10n12_090	NCU01255	NCU01255	NCU01255	related to dynamin-like protein	70 SUBCELLULAR LOCALIZATION_70.16 mitochondrion	;MMR_HSR1;Dynamin_N;Dynamin_M;AfsA;HycH;	Non-secretory protein	B_Evol	B_Evol	B_Evol		0
b10n12_070	NCU01257	NCU01257	NCU01257	related to rRNA processing protein EBP2	11 TRANSCRIPTION_11.02 RNA synthesis_11.02.01 rRNA synthesis_11.04 RNA processing_11.04.01 rRNA processing	;SDA1;Ebp2;Mis14;rRNA_processing;	Non-secretory protein	E_Evol	B_Evol	B_Evol		0
b10n12_060	NCU01258	NCU01258	NCU01258	probable cyanate lyase	01 METABOLISM_01.02 nitrogen, sulfur and selenium metabolism	;HTH_3;Cyanate_lyase;	Non-secretory protein	E_Evol	E_Evol	E_Evol		0
b10n12_050	NCU01259	NCU01259	NCU01259	putative protein	99 UNCLASSIFIED PROTEINS	NULL	Non-secretory protein	B_Evol	F_Evol	F_Evol		0
b10n12_040	NCU01260	NCU01260	NCU01260	hypothetical protein	99 UNCLASSIFIED PROTEINS	;B-block_TFIIIC;AT_hook;AT_hook;AT_hook;FKBP_C;	Non-secretory protein	F_Evol	F_Evol	F_Evol		0
b10n12_030	NCU01262	NCU01262	NCU01262	putative protein	99 UNCLASSIFIED PROTEINS	NULL	Signal peptide	N_Evol	N_Evol	N_Evol		0
b13m13_160	NCU01268	NCU01268	NCU01268	related to non-canonical ubiquitin conjugating enzyme 1	14 PROTEIN FATE (folding, modification, destination)_14.07 protein modification_14.07.05 modification by ubiquitination, deubiquitination_14.13 protein/peptide degradation_14.13.01 cytoplasmic and nuclear protein degradation	;UQ_con;	Non-secretory protein	E_Evol	E_Evol	O_Evol		0
b13m13_150	NCU01269	NCU01269	NCU01269	probable FZR protein (fizzy-related protein)	10 CELL CYCLE AND DNA PROCESSING_10.03 cell cycle_10.03.01 mitotic cell cycle and cell cycle control	;WD40;WD40;WD40;eIF2A;WD40;WD40;	Non-secretory protein	E_Evol	E_Evol	E_Evol		0
b13m13_140	NCU01270	NCU01270	NCU01270	related to ribose-phosphate pyrophosphokinase II	01 METABOLISM_01.03 nucleotide/nucleoside/nucleobase metabolism_01.03.01 purin nucleotide/nucleoside/nucleobase metabolism_01.03.04 pyrimidine nucleotide/nucleoside/nucleobase metabolism	;DUF1442;Glycos_transf_2;Pribosyltran;	Non-secretory protein	E_Evol	E_Evol	E_Evol		0
b13m13_130	NCU01271	NCU01271	NCU01271	ornithine decarboxylase	01 METABOLISM_01.01 amino acid metabolism_01.01.05 metabolism of urea cycle, creatine and polyamines_01.01.05.01 metabolism of polyamines_01.01.05.01.01 biosynthesis of polyamines	;Orn_Arg_deC_N;Orn_DAP_Arg_deC;	Non-secretory protein	E_Evol	E_Evol	E_Evol		0
b13m13_120	NCU01272	NCU01272	NCU01272	related to metalloprotease 1	14 PROTEIN FATE (folding, modification, destination)_14.13 protein/peptide degradation_16 PROTEIN WITH BINDING FUNCTION OR COFACTOR REQUIREMENT (structural or catalytic)_16.17 metal binding_16.17.09 heavy metal binding (Cu, Fe, Zn)	;Peptidase_M16;Peptidase_M16_C;M16C_assoc;Transposase_mut;Peptidase_M16_C;	Non-secretory protein	E_Evol	E_Evol	E_Evol		0
b13m13_100	NCU01274	NCU01274	NCU01274	hypothetical protein	99 UNCLASSIFIED PROTEINS	NULL	Non-secretory protein	F_Evol	F_Evol	F_Evol		0
b13m13_080	NCU01276	NCU01276	NCU01276	related to N-acetyltransferase	14 PROTEIN FATE (folding, modification, destination)_14.07 protein modification_14.07.04 modification by acetylation, deacetylation	;Acetyltransf_1;FR47;	Non-secretory protein	E_Evol	E_Evol	E_Evol		0
b13m13_070	NCU01277	NCU01277	NCU01277	hypothetical protein	99 UNCLASSIFIED PROTEINS	NULL	Non-secretory protein	F_Evol	F_Evol	F_Evol		0
b13m13_040	NCU01279	NCU01279	NCU01279	conserved hypothetical protein	99 UNCLASSIFIED PROTEINS	;ICE2;Lung_7-TM_R;	Signal peptide	B_Evol	A_Evol	F_Evol		0
b13m13_020	NCU01281	NCU01281	NCU01281	hypothetical protein	99 UNCLASSIFIED PROTEINS	NULL	Non-secretory protein	F_Evol	F_Evol	F_Evol		0
b9k17_010	NCU01282	NCU01282	NCU01282	related to SNF7 protein	01 METABOLISM_01.05 C-compound and carbohydrate metabolism_01.05.25 regulation of C-compound and carbohydrate metabolism_14 PROTEIN FATE (folding, modification, destination)_14.04 protein targeting, sorting and translocation_43 CELL TYPE DIFFERENTIATION_43.01 fungal/microorganismic cell type differentiation_43.01.03 fungal and other eukaryotic cell type differentiation_43.01.03.09 development of …	;Snf7;	Non-secretory protein	E_Evol	E_Evol	E_Evol		0
b9k17_020	NCU01283	NCU01283	NCU01283	conserved hypothetical protein	99 UNCLASSIFIED PROTEINS	;S-antigen;	Non-secretory protein	B_Evol	N_Evol	N_Evol		0
b9k17_030	NCU01284	NCU01284	NCU01284	related to chaperone protein DNAJ	14 PROTEIN FATE (folding, modification, destination)_14.10 assembly of protein complexes_32 CELL RESCUE, DEFENSE AND VIRULENCE_32.01 stress response	;DnaJ;	Signal peptide	F_Evol	F_Evol	F_Evol		0
b9k17_040	NCU01285	NCU01285	NCU01285	conserved hypothetical protein	99 UNCLASSIFIED PROTEINS	;Sugar_tr;MFS_1;DUF1228;DUF112;	Non-secretory protein	E_Evol	B_Evol	B_Evol		0
b9k17_060	NCU01288	NCU01288	NCU01288	related to leucine permease transcriptional regulator SAC3	01 METABOLISM_01.01 amino acid metabolism_01.01.13 regulation of amino acid metabolism_11 TRANSCRIPTION_11.02 RNA synthesis_11.02.03 mRNA synthesis_11.02.03.04 transcriptional control_70 SUBCELLULAR LOCALIZATION_70.10 nucleus	;SAC3_GANP;Coprinus_mating;ETC_C1_NDUFA4;Atrophin-1;Extensin_2;HPC2;MAP7;CTF_NFI;Chon_Sulph_att;	Non-secretory protein	F_Evol	F_Evol	F_Evol		0
b9k17_070	NCU01289	NCU01289	NCU01289	related to exo-alpha-sialidase / neuraminidase	70 SUBCELLULAR LOCALIZATION_70.01 cell wall	;ASFV_J13L;Adeno_E3_CR2;CcoS;	Signal peptide	F_Evol	N_Evol	N_Evol		0
b9k17_080	NCU01290	NCU01290	NCU01290	probable centromere/microtubule binding protein CBF5	10 CELL CYCLE AND DNA PROCESSING_10.03 cell cycle_10.03.01 mitotic cell cycle and cell cycle control_40 CELL FATE_40.01 cell growth / morphogenesis_70 SUBCELLULAR LOCALIZATION_70.10 nucleus	;DKCLD;TruB_N;PUA;S-antigen;RNA_polI_A34;	Non-secretory protein	E_Evol	E_Evol	E_Evol		0
b9k17_090	NCU01291	NCU01291	NCU01291	conserved hypothetical protein	99 UNCLASSIFIED PROTEINS	;E_raikovi_mat;	Signal peptide	F_Evol	F_Evol	F_Evol		0
b9k17_110	NCU01292	NCU01292	NCU01292	hypothetical protein	99 UNCLASSIFIED PROTEINS	NULL	Non-secretory protein	O_Evol	F_Evol	F_Evol		0
b9k17_130	NCU01294	NCU01294	NCU01294	related to amino-terminal amidase	14 PROTEIN FATE (folding, modification, destination)_14.07 protein modification_14.13 protein/peptide degradation_14.13.01 cytoplasmic and nuclear protein degradation_70 SUBCELLULAR LOCALIZATION_70.03 cytoplasm	;CN_hydrolase;	Non-secretory protein	F_Evol	F_Evol	N_Evol		0
b9k17_160	NCU01296	NCU01296	NCU01296	putative protein	99 UNCLASSIFIED PROTEINS	NULL	Signal peptide	N_Evol	N_Evol	N_Evol		0
b9k17_170	NCU01297	NCU01297	NCU01297	related to CLOCK protein	11 TRANSCRIPTION_11.02 RNA synthesis_11.02.03 mRNA synthesis_11.02.03.04 transcriptional control	NULL	Non-secretory protein	F_Evol	F_Evol	N_Evol		0
65e11_010	NCU01298	NCU01298	NCU01298	related to QID3 protein	42 BIOGENESIS OF CELLULAR COMPONENTS_42.01 cell wall	;GRP;	Signal peptide	N_Evol	N_Evol	N_Evol		0
65e11_020	NCU01299	NCU01299	NCU01299	hypothetical protein	99 UNCLASSIFIED PROTEINS	NULL	Non-secretory protein	F_Evol	F_Evol	F_Evol		0
65e11_030	NCU01300	NCU01300	NCU01300	probable imidazoleglycerol-phosphate dehydratase	01 METABOLISM_01.01 amino acid metabolism_01.01.09 metabolism of the cysteine - aromatic group_01.01.09.07 metabolism of histidine_01.01.09.07.01 biosynthesis of histidine	;IGPD;	Non-secretory protein	E_Evol	E_Evol	E_Evol		0
65e11_040	NCU01301	NCU01301	NCU01301	hypothetical protein	99 UNCLASSIFIED PROTEINS	NULL	Non-secretory protein	F_Evol	F_Evol	F_Evol		0
65e11_060	NCU01303	NCU01303	NCU01303	hypothetical protein	99 UNCLASSIFIED PROTEINS	NULL	Non-secretory protein	F_Evol	F_Evol	F_Evol		0
65e11_070	NCU01304	NCU01304	NCU01304	related to PET127	12 PROTEIN SYNTHESIS_12.07 translational control_70 SUBCELLULAR LOCALIZATION_70.16 mitochondrion	;Pet127;ALF;	Non-secretory protein	F_Evol	F_Evol	F_Evol		0
65e11_080	NCU01305	NCU01305	NCU01305	related to membrane protein	42 BIOGENESIS OF CELLULAR COMPONENTS_42.02 eukaryotic plasma membrane	;Rhomboid;	Non-secretory protein	B_Evol	B_Evol	F_Evol		0
65e11_090	NCU01306	NCU01306	NCU01306	conserved hypothetical protein	99 UNCLASSIFIED PROTEINS	;Vicilin_N;Uso1_p115_C;	Non-secretory protein	N_Evol	N_Evol	N_Evol		0
65e11_100	NCU01307	NCU01307	NCU01307	hypothetical protein	99 UNCLASSIFIED PROTEINS	NULL	Non-secretory protein	F_Evol	F_Evol	F_Evol		0
65e11_110	NCU01309	NCU01309	NCU01309	conserved hypothetical protein	99 UNCLASSIFIED PROTEINS	NULL	Non-secretory protein	F_Evol	F_Evol	F_Evol		0
65e11_120	NCU01310	NCU01310	NCU01310	conserved hypothetical protein	99 UNCLASSIFIED PROTEINS	;DUF1777;	Non-secretory protein	F_Evol	F_Evol	F_Evol		0
65e11_130	NCU01311	NCU01311	NCU01311	conserved hypothetical protein	99 UNCLASSIFIED PROTEINS	;ERp29;	Non-secretory protein	N_Evol	N_Evol	N_Evol		0
65e11_140	NCU01312	NCU01312	NCU01312	regulator of conidiation RCA-1	98 CLASSIFICATION NOT YET CLEAR-CUT	;Myb_DNA-binding;Myb_DNA-binding;	Non-secretory protein	O_Evol	F_Evol	F_Evol		0
65e11_170	NCU01314	NCU01314	NCU01314	hypothetical protein	99 UNCLASSIFIED PROTEINS	NULL	Non-secretory protein	N_Evol	N_Evol	N_Evol		0
b12k8_020	NCU01317	NCU01317	NCU01317	probable ribosomal protein L12	12 PROTEIN SYNTHESIS_12.01 ribosome biogenesis	;Ribosomal_L11_N;Ribosomal_L11;	Non-secretory protein	E_Evol	E_Evol	E_Evol		0
b12k8_030	NCU01318	NCU01318	NCU01318	probable SEC23	20 CELLULAR TRANSPORT, TRANSPORT FACILITIES AND TRANSPORT ROUTES_20.09 transport routes_20.09.07 vesicular transport (Golgi network, etc.)_70 SUBCELLULAR LOCALIZATION_70.09 intracellular transport vesicles	;zf-MIZ;zf-Sec23_Sec24;Sec23_trunk;Sec23_BS;Sec23_helical;Gelsolin;	Non-secretory protein	E_Evol	E_Evol	E_Evol		0
b12k8_040	NCU01319	NCU01319	NCU01319	hypothetical protein	99 UNCLASSIFIED PROTEINS	;UPF0154;	Non-secretory protein	F_Evol	F_Evol	F_Evol		0
12f11_010	NCU01320	NCU01320	NCU01320	related to microsomal glutathione s-transferase 3	98 CLASSIFICATION NOT YET CLEAR-CUT	;MAPEG;	Non-secretory protein	E_Evol	E_Evol	E_Evol		0
12f11_020	NCU01321	NCU01321	NCU01321	related to DNA polymerase Tdt-N	11 TRANSCRIPTION	;NTP_transf_2;	Non-secretory protein	O_Evol	F_Evol	F_Evol		0
12f11_030	NCU01322	NCU01322	NCU01322	related to transcription initiation factor IIE chain TFA1	11 TRANSCRIPTION_11.02 RNA synthesis_11.02.03 mRNA synthesis_11.02.03.01 general transcription activities_70 SUBCELLULAR LOCALIZATION_70.10 nucleus	;TFIIE_alpha;	Non-secretory protein	F_Evol	F_Evol	F_Evol		0
12f11_050	NCU01324	NCU01324	NCU01324	conserved hypothetical protein	99 UNCLASSIFIED PROTEINS	NULL	Non-secretory protein	B_Evol	B_Evol	F_Evol		0
12f11_060	NCU01325	NCU01325	NCU01325	hypothetical protein	99 UNCLASSIFIED PROTEINS	NULL	Non-secretory protein	N_Evol	N_Evol	N_Evol		0
12f11_080	NCU01327	NCU01327	NCU01327	hypothetical protein	99 UNCLASSIFIED PROTEINS	;Dynamitin;TPR_MLP1_2;Filament;TrwC;ATG16;DUF1974;TolA;Vps5;Rab5-bind;Rabaptin;	Non-secretory protein	F_Evol	F_Evol	F_Evol		0
12f11_090	NCU01328	NCU01328	NCU01328	probable transketolase	02 ENERGY_02.07 pentose-phosphate pathway	;Transketolase_N;E1_dh;TPP_enzyme_C;Transket_pyr;Transketolase_C;	Non-secretory protein	E_Evol	E_Evol	E_Evol		0
12f11_100	NCU01329	NCU01329	NCU01329	conserved hypothetical protein	99 UNCLASSIFIED PROTEINS	;ATP-synt_E;	Non-secretory protein	F_Evol	F_Evol	F_Evol		0
12f11_110	NCU01330	NCU01330	NCU01330	conserved hypothetical protein	99 UNCLASSIFIED PROTEINS	;Syja_N;	Non-secretory protein	B_Evol	B_Evol	F_Evol		0
12f11_120	NCU01331	NCU01331	NCU01331	probable 13 kD U4/U6.U5 snRNP associate protein Snu13	11 TRANSCRIPTION_11.02 RNA synthesis_11.02.03 mRNA synthesis_11.04 RNA processing_11.04.03 mRNA processing (splicing, 5'-, 3'-end processing)_11.04.03.01 splicing	;RNase_P_pop3;Ribosomal_L7Ae;	Non-secretory protein	E_Evol	E_Evol	E_Evol		0
12f11_130	NCU01332	NCU01332	NCU01332	vacuolar ATP synthase 16 kDa proteolipid subunit VMA-3	20 CELLULAR TRANSPORT, TRANSPORT FACILITIES AND TRANSPORT ROUTES_20.03 transport facilities_20.03.22 transport ATPases_20.09 transport routes_20.09.13 vacuolar/lysosomal transport_70 SUBCELLULAR LOCALIZATION_70.25 vacuole or lysosome	;ATP-synt_C;ATP-synt_C;	Signal peptide	E_Evol	E_Evol	E_Evol		0
12f11_150	NCU01334	NCU01334	NCU01334	hypothetical protein	99 UNCLASSIFIED PROTEINS	NULL	Non-secretory protein	N_Evol	N_Evol	N_Evol		0
12f11_160	NCU01335	NCU01335	NCU01335	related to septation (sepH) gene	10 CELL CYCLE AND DNA PROCESSING_10.03 cell cycle_10.03.03 cytokinesis (cell division) /septum formation and hydrolysis_70 SUBCELLULAR LOCALIZATION_70.10 nucleus	;Kdo;Pkinase;Pkinase_Tyr;SPT2;DUF339;	Non-secretory protein	E_Evol	B_Evol	B_Evol		0
12f11_170	NCU01336	NCU01336	NCU01336	hypothetical protein	99 UNCLASSIFIED PROTEINS	NULL	Non-secretory protein	F_Evol	F_Evol	N_Evol		0
12f11_180	NCU01337	NCU01337	NCU01337	related to tetrahydrofolylpolyglutamate synthase	01 METABOLISM_01.07 metabolism of vitamins, cofactors, and prosthetic groups_01.07.01 biosynthesis of vitamins, cofactors, and prosthetic groups	;Mur_ligase_M;Mur_ligase_C;	Non-secretory protein	E_Evol	E_Evol	E_Evol		0
12f11_190	NCU01338	NCU01338	NCU01338	conserved hypothetical protein	99 UNCLASSIFIED PROTEINS	;DUF218;	Non-secretory protein	E_Evol	A_Evol	F_Evol		0
12f11_200	NCU01339	NCU01339	NCU01339	hypothetical protein	99 UNCLASSIFIED PROTEINS	NULL	Non-secretory protein	B_Evol	F_Evol	F_Evol		0
12f11_210	NCU01340	NCU01340	NCU01340	conserved hypothetical protein	99 UNCLASSIFIED PROTEINS	;HD;	Non-secretory protein	E_Evol	E_Evol	O_Evol		0
12f11_220	NCU01341	NCU01341	NCU01341	related to U1 small nuclear ribonucleoprotein c	11 TRANSCRIPTION_11.02 RNA synthesis_11.02.03 mRNA synthesis_11.04 RNA processing_11.04.03 mRNA processing (splicing, 5'-, 3'-end processing)_11.04.03.01 splicing	;zf-U1;Collagen;	Non-secretory protein	E_Evol	E_Evol	E_Evol		0
12f11_230	NCU01342	NCU01342	NCU01342	probable ERV25 protein (component of the COPII-coated vesicles)	20 CELLULAR TRANSPORT, TRANSPORT FACILITIES AND TRANSPORT ROUTES_20.09 transport routes_20.09.07 vesicular transport (Golgi network, etc.)_70 SUBCELLULAR LOCALIZATION_70.09 intracellular transport vesicles	NULL	Signal peptide	E_Evol	E_Evol	E_Evol		0
12f11_240	NCU01343	NCU01343	NCU01343	conserved hypothetical protein	99 UNCLASSIFIED PROTEINS	;DUF339;	Signal peptide	E_Evol	F_Evol	F_Evol		0
12f11_250	NCU01344	NCU01344	NCU01344	conserved hypothetical protein	99 UNCLASSIFIED PROTEINS	;AT_hook;Mis12_component;	Non-secretory protein	F_Evol	F_Evol	F_Evol		0
12f11_260	NCU01345	NCU01345	NCU01345	related to transcription factor atf1+	11 TRANSCRIPTION_11.02 RNA synthesis_11.02.03 mRNA synthesis_11.02.03.04 transcriptional control_34 INTERACTION WITH THE ENVIRONMENT_34.11 cellular sensing and response to external stimulus_34.11.03 chemoperception and response_34.11.03.07 pheromone response, mating-type determination, sex-specific proteins_43 CELL TYPE DIFFERENTIATION_43.01 fungal/microorganismic cell type differentiation_43.01.…	;Extensin_2;bZIP_1;bZIP_2;	Non-secretory protein	B_Evol	B_Evol	F_Evol		0
b13a5_030	NCU01347	NCU01347	NCU01347	conserved hypothetical protein	99 UNCLASSIFIED PROTEINS	NULL	Non-secretory protein	E_Evol	B_Evol	F_Evol		0
b13a5_050	NCU01348	NCU01348	NCU01348	conserved hypothetical protein	99 UNCLASSIFIED PROTEINS	;Arginase;	Signal peptide	E_Evol	E_Evol	E_Evol		0
b13a5_070	NCU01349	NCU01349	NCU01349	hypothetical protein	99 UNCLASSIFIED PROTEINS	;Extensin_2;	Non-secretory protein	F_Evol	F_Evol	F_Evol		0
b13a5_075	NCU01350	NCU01350	NCU01350	hypothetical protein	99 UNCLASSIFIED PROTEINS	NULL	Non-secretory protein	N_Evol	N_Evol	N_Evol		0
b13a5_080	NCU01351	NCU01351	NCU01351	hypothetical protein	99 UNCLASSIFIED PROTEINS	NULL	Signal peptide	F_Evol	N_Evol	N_Evol		0
15e6_230	NCU01353	NCU01353	NCU01353	related to mixed-linked glucanase precursor MLG1	01 METABOLISM_01.05 C-compound and carbohydrate metabolism	;Glyco_hydro_16;	Non-secretory protein	F_Evol	F_Evol	F_Evol		0
15e6_190	NCU01356	NCU01356	NCU01356	conserved hypothetical protein	99 UNCLASSIFIED PROTEINS	;MFS_1;Xan_ur_permease;Sulfate_transp;ATP-synt_8;	Non-secretory protein	O_Evol	O_Evol	F_Evol		0
15e6_180	NCU01357	NCU01357	NCU01357	related to palI protein	30 CELLULAR COMMUNICATION/SIGNAL TRANSDUCTION MECHANISM_30.01 cellular signalling	;PalI;DUF846;	Signal peptide	B_Evol	B_Evol	B_Evol		0
15e6_150	NCU01358	NCU01358	NCU01358	hypothetical protein	99 UNCLASSIFIED PROTEINS	NULL	Non-secretory protein	F_Evol	F_Evol	F_Evol		0
15e6_140	NCU01360	NCU01360	NCU01360	conserved hypothetical protein	99 UNCLASSIFIED PROTEINS	NULL	Non-secretory protein	E_Evol	E_Evol	B_Evol		0
15e6_130	NCU01361	NCU01361	NCU01361	conserved hypothetical protein	98 CLASSIFICATION NOT YET CLEAR-CUT	;Sec39;SecA_DEAD;	Non-secretory protein	F_Evol	F_Evol	F_Evol		0
15e6_120	NCU01362	NCU01362	NCU01362	related to IES1 - INO80 chromatin remodeling complex subunit 1	98 CLASSIFICATION NOT YET CLEAR-CUT	NULL	Non-secretory protein	F_Evol	F_Evol	F_Evol		0
15e6_100	NCU01364	NCU01364	NCU01364	related to oxidoreductase	98 CLASSIFICATION NOT YET CLEAR-CUT	;2OG-FeII_Oxy;	Non-secretory protein	E_Evol	E_Evol	B_Evol		0
15e6_090	NCU01365	NCU01365	NCU01365	conserved hypothetical protein	98 CLASSIFICATION NOT YET CLEAR-CUT	;DNA_ligase_A_M;	Non-secretory protein	F_Evol	F_Evol	F_Evol		0
15e6_080	NCU01366	NCU01366	NCU01366	related to protease ULP2 protein	14 PROTEIN FATE (folding, modification, destination)_14.13 protein/peptide degradation	;Peptidase_C48;Extensin_2;	Non-secretory protein	F_Evol	N_Evol	N_Evol		0
15e6_070	NCU01367	NCU01367	NCU01367	related to a component of the yeast U3 snoRNP Rrp9p	11 TRANSCRIPTION_11.02 RNA synthesis_11.02.01 rRNA synthesis	;WD40;WD40;WD40;WD40;WD40;WD40;	Non-secretory protein	E_Evol	B_Evol	B_Evol		0
15e6_040	NCU01369	NCU01369	NCU01369	probable ATP-dependent RNA helicase DED1	11 TRANSCRIPTION_11.02 RNA synthesis_11.02.03 mRNA synthesis_11.04 RNA processing_11.04.03 mRNA processing (splicing, 5'-, 3'-end processing)_11.04.03.01 splicing	;ResIII;DEAD;	Non-secretory protein	E_Evol	E_Evol	E_Evol		0
15e6_030	NCU01370	NCU01370	NCU01370	related to origin recognition complex subunit 2	10 CELL CYCLE AND DNA PROCESSING_10.01 DNA processing_10.01.03 DNA synthesis and replication_34 INTERACTION WITH THE ENVIRONMENT_34.11 cellular sensing and response to external stimulus_34.11.03 chemoperception and response_34.11.03.07 pheromone response, mating-type determination, sex-specific proteins_43 CELL TYPE DIFFERENTIATION_43.01 fungal/microorganismic cell type differentiation_43.01.03 f…	;AT_hook;ORC2;	Non-secretory protein	E_Evol	F_Evol	F_Evol		0
15e6_020	NCU01371	NCU01371	NCU01371	conserved hypothetical protein	98 CLASSIFICATION NOT YET CLEAR-CUT	NULL	Non-secretory protein	E_Evol	A_Evol	A_Evol		0
15e11_170	NCU01373	NCU01373	NCU01373	hypothetical protein	99 UNCLASSIFIED PROTEINS	NULL	Non-secretory protein	N_Evol	N_Evol	N_Evol		0
15e11_160	NCU01374	NCU01374	NCU01374	hypothetical protein	99 UNCLASSIFIED PROTEINS	;CutC;	Non-secretory protein	O_Evol	F_Evol	N_Evol		0
15e11_155	NCU01375	NCU01375	NCU01375	hypothetical protein	99 UNCLASSIFIED PROTEINS	NULL	Non-secretory protein	N_Evol	N_Evol	N_Evol		0
15e11_150	NCU01376	NCU01376	NCU01376	alkaline phosphatase pho-2	01 METABOLISM_01.04 phosphate metabolism_01.06 lipid, fatty acid and isoprenoid metabolism_01.07 metabolism of vitamins, cofactors, and prosthetic groups_01.07.01 biosynthesis of vitamins, cofactors, and prosthetic groups	;Alk_phosphatase;Sulfatase;Phosphodiest;PglZ;	Signal peptide	E_Evol	E_Evol	B_Evol		0
15e11_130	NCU01378	NCU01378	NCU01378	related to acetoacetyl-CoA synthetase	01 METABOLISM_01.01 amino acid metabolism	;AMP-binding;	Non-secretory protein	E_Evol	E_Evol	E_Evol		0
15e11_110	NCU01380	NCU01380	NCU01380	conserved hypothetical protein	99 UNCLASSIFIED PROTEINS	NULL	Signal peptide	B_Evol	F_Evol	F_Evol		0
15e11_090	NCU01381	NCU01381	NCU01381	related to disease resistance protein aig2	32 CELL RESCUE, DEFENSE AND VIRULENCE_32.05 disease, virulence and defense_32.05.01 resistance proteins	;AIG2;	Non-secretory protein	E_Evol	F_Evol	F_Evol		0
15e11_080	NCU01382	NCU01382	NCU01382	putative protein	99 UNCLASSIFIED PROTEINS	;HOK_GEF;	Non-secretory protein	F_Evol	N_Evol	N_Evol		0
15e11_050	NCU01385	NCU01385	NCU01385	hypothetical protein	99 UNCLASSIFIED PROTEINS	NULL	Signal peptide	N_Evol	N_Evol	N_Evol		0
15e11_040	NCU01386	NCU01386	NCU01386	conserved hypothetical protein	99 UNCLASSIFIED PROTEINS	;Extensin_2;Zn_clus;Fungal_trans;	Non-secretory protein	F_Evol	F_Evol	F_Evol		0
15e11_030	NCU01387	NCU01387	NCU01387	conserved hypothetical protein	99 UNCLASSIFIED PROTEINS	;Spc97_Spc98;	Non-secretory protein	F_Evol	F_Evol	F_Evol		0
15e11_010	NCU01388	NCU01388	NCU01388	probable alpha-1,2-mannosyltransferase	01 METABOLISM_01.05 C-compound and carbohydrate metabolism_14 PROTEIN FATE (folding, modification, destination)_14.07 protein modification_14.07.02 modification with sugar residues (e.g. glycosylation, deglycosylation)	;Glyco_transf_15;	Signal peptide	B_Evol	B_Evol	B_Evol		0
b7o17_010	NCU01389	NCU01389	NCU01389	conserved hypothetical protein	99 UNCLASSIFIED PROTEINS	;WD40;WD40;PKD;WD40;Reg_prop;WD40;WD40;Reg_prop;	Non-secretory protein	E_Evol	E_Evol	F_Evol		0
b7o17_020	NCU01390	NCU01390	NCU01390	conserved hypothetical protein	99 UNCLASSIFIED PROTEINS	;DUF572;S-antigen;	Non-secretory protein	E_Evol	E_Evol	E_Evol		0
b7o17_030	NCU01391	NCU01391	NCU01391	putative protein	99 UNCLASSIFIED PROTEINS	NULL	Non-secretory protein	F_Evol	F_Evol	F_Evol		0
b7o17_040	NCU01393	NCU01393	NCU01393	related to chitinase	01 METABOLISM_01.05 C-compound and carbohydrate metabolism_42 BIOGENESIS OF CELLULAR COMPONENTS_42.01 cell wall	;Glyco_hydro_18;	Non-secretory protein	E_Evol	E_Evol	B_Evol		0
g11a3_010	NCU01401	NCU01401	NCU01401	hypothetical protein	99 UNCLASSIFIED PROTEINS	NULL	Non-secretory protein	B_Evol	F_Evol	F_Evol		0
g11a3_020	NCU01402	NCU01402	NCU01402	related to indoleamine 2,3-dioxygenase	01 METABOLISM_01.01 amino acid metabolism_01.01.09 metabolism of the cysteine - aromatic group_01.01.09.06 metabolism of tryptophan_01.01.09.06.02 degradation of tryptophan	;IDO;	Non-secretory protein	B_Evol	B_Evol	F_Evol		0
g11a3_030	NCU01403	NCU01403	NCU01403	hypothetical protein	99 UNCLASSIFIED PROTEINS	;Metallothionein;Granulin;	Signal peptide	F_Evol	F_Evol	F_Evol		0
g11a3_040	NCU01404	NCU01404	NCU01404	related to rRNA (guanine-N1-)-methyltransferase	11 TRANSCRIPTION_11.04 RNA processing_11.04.01 rRNA processing	;SpoU_sub_bind;SpoU_methylase;	Non-secretory protein	F_Evol	F_Evol	F_Evol		0
g11a3_060	NCU01407	NCU01407	NCU01407	hypothetical protein	99 UNCLASSIFIED PROTEINS	;PRKCSH;	Non-secretory protein	N_Evol	N_Evol	N_Evol		0
g11a3_070	NCU01408	NCU01408	NCU01408	related to JAB1-containing signalosome subunit 3	14 PROTEIN FATE (folding, modification, destination)_14.07 protein modification_14.07.03 modification by phosphorylation, dephosphorylation, autophosphorylation_30 CELLULAR COMMUNICATION/SIGNAL TRANSDUCTION MECHANISM_30.01 cellular signalling_30.01.05 enzyme mediated signal transduction	;PCI;	Non-secretory protein	F_Evol	F_Evol	F_Evol		0
g11a3_080	NCU01409	NCU01409	NCU01409	related to B cell antigen receptor Ig beta associated protein 1	98 CLASSIFICATION NOT YET CLEAR-CUT	;SPRY;LisH;	Non-secretory protein	E_Evol	B_Evol	F_Evol		0
b8p8_210	NCU01410	NCU01410	NCU01410	conserved hypothetical protein	99 UNCLASSIFIED PROTEINS	;DUF1711;	Non-secretory protein	F_Evol	F_Evol	F_Evol		0
b8p8_200	NCU01411	NCU01411	NCU01411	related to dityrosine transporter	20 CELLULAR TRANSPORT, TRANSPORT FACILITIES AND TRANSPORT ROUTES_20.01 transported compounds (substrates)_20.01.27 drug/toxin transport_20.03 transport facilities_32 CELL RESCUE, DEFENSE AND VIRULENCE_32.07 detoxification	;Sugar_tr;MFS_1;C4dic_mal_tran;PUCC;MASE1;Peptidase_M50;	Non-secretory protein	B_Evol	F_Evol	F_Evol		0
b8p8_190	NCU01412	NCU01412	NCU01412	related to glutamate-5-semialdehyde dehydrogenase	01 METABOLISM_01.01 amino acid metabolism	;DUF935;Aldedh;Cys_Met_Meta_PP;	Non-secretory protein	E_Evol	E_Evol	E_Evol		0
b8p8_180	NCU01413	NCU01413	NCU01413	hypothetical protein	99 UNCLASSIFIED PROTEINS	;Kinesin-related;CALCOCO1;Tropomyosin;Phage_GP20;BASP1;	Non-secretory protein	F_Evol	F_Evol	F_Evol		0
b8p8_170	NCU01414	NCU01414	NCU01414	ascospore maturation 1 protein (Asm-1) ASM-1	10 CELL CYCLE AND DNA PROCESSING_10.03 cell cycle_10.03.01 mitotic cell cycle and cell cycle control_11 TRANSCRIPTION_11.02 RNA synthesis_11.02.03 mRNA synthesis_11.02.03.04 transcriptional control_43 CELL TYPE DIFFERENTIATION_43.01 fungal/microorganismic cell type differentiation_43.01.03 fungal and other eukaryotic cell type differentiation_43.01.03.09 development of asco- basidio- or zygospore	;APSES;Extensin_2;	Non-secretory protein	F_Evol	F_Evol	F_Evol		0
b8p8_140	NCU01416	NCU01416	NCU01416	hypothetical protein	99 UNCLASSIFIED PROTEINS	NULL	Non-secretory protein	N_Evol	N_Evol	N_Evol		0
b8p8_110	NCU01417	NCU01417	NCU01417	related to acetyl coenzyme A synthetase	01 METABOLISM_01.06 lipid, fatty acid and isoprenoid metabolism_02 ENERGY_02.01 glycolysis and gluconeogenesis_02.10 tricarboxylic-acid pathway (citrate cycle, Krebs cycle, TCA cycle)	;AMP-binding;	Non-secretory protein	E_Evol	E_Evol	O_Evol		0
b8p8_100	NCU01418	NCU01418	NCU01418	clock-controlled protein 6 (ccg-6) CCG-6	43 CELL TYPE DIFFERENTIATION_43.01 fungal/microorganismic cell type differentiation_43.01.03 fungal and other eukaryotic cell type differentiation_43.01.03.09 development of asco- basidio- or zygospore	NULL	Signal peptide	O_Evol	O_Evol	O_Evol		0
b8p8_090	NCU01419	NCU01419	NCU01419	probable NADPH quinone oxidoreductase homolog PIG3	98 CLASSIFICATION NOT YET CLEAR-CUT	;ADH_N;ADH_zinc_N;	Non-secretory protein	E_Evol	E_Evol	E_Evol		0
b8p8_070	NCU01421	NCU01421	NCU01421	conserved hypothetical protein	99 UNCLASSIFIED PROTEINS	NULL	Non-secretory protein	F_Evol	F_Evol	F_Evol		0
b8p8_060	NCU01422	NCU01422	NCU01422	probable multiprotein bridging factor MBF1	11 TRANSCRIPTION_11.02 RNA synthesis_11.02.03 mRNA synthesis_11.02.03.04 transcriptional control	;MBF1;HTH_3;	Non-secretory protein	E_Evol	E_Evol	E_Evol		0
b8p8_050	NCU01423	NCU01423	NCU01423	conserved hypothetical protein	99 UNCLASSIFIED PROTEINS	NULL	Non-secretory protein	F_Evol	F_Evol	F_Evol		0
b8p8_040	NCU01424	NCU01424	NCU01424	conserved hypothetical protein	99 UNCLASSIFIED PROTEINS	;DUF636;	Non-secretory protein	E_Evol	E_Evol	E_Evol		0
b8p8_030	NCU01425	NCU01425	NCU01425	conserved hypothetical protein	99 UNCLASSIFIED PROTEINS	NULL	Signal peptide	F_Evol	F_Evol	F_Evol		0
b8p8_020	NCU01426	NCU01426	NCU01426	conserved hypothetical protein	99 UNCLASSIFIED PROTEINS	;VSP;Hormone_5;UPAR_LY6;	Signal peptide	F_Evol	F_Evol	F_Evol		0
b20d17_010	NCU01429	NCU01429	NCU01429	related to 3-phosphoserine aminotransferase	01 METABOLISM_01.01 amino acid metabolism_01.01.09 metabolism of the cysteine - aromatic group_01.01.09.01 metabolism of glycine_01.01.09.01.01 biosynthesis of glycine_01.01.09.02 metabolism of serine_01.01.09.02.01 biosynthesis of serine	;Aminotran_5;	Non-secretory protein	E_Evol	E_Evol	E_Evol		0
b20d17_030	NCU01431	NCU01431	NCU01431	probable cytokinesis protein SepA	10 CELL CYCLE AND DNA PROCESSING_10.03 cell cycle_10.03.03 cytokinesis (cell division) /septum formation and hydrolysis_43 CELL TYPE DIFFERENTIATION_43.01 fungal/microorganismic cell type differentiation_43.01.03 fungal and other eukaryotic cell type differentiation_43.01.03.05 budding, cell polarity and filament formation	;Drf_GBD;Drf_FH3;DASH_Spc34;KAP_NTPase;ERM;Atrophin-1;PGK;PLRV_ORF5;FH2;Drf_DAD;	Non-secretory protein	B_Evol	F_Evol	F_Evol		0
b20d17_040	NCU01432	NCU01432	NCU01432	hypothetical protein	99 UNCLASSIFIED PROTEINS	NULL	Non-secretory protein	N_Evol	N_Evol	N_Evol		0
b20d17_050	NCU01433	NCU01433	NCU01433	phosphoprotein phosphatase (serine/threonine specific protein phosphatase) PPT-1	14 PROTEIN FATE (folding, modification, destination)_14.07 protein modification_14.07.03 modification by phosphorylation, dephosphorylation, autophosphorylation_30 CELLULAR COMMUNICATION/SIGNAL TRANSDUCTION MECHANISM_30.01 cellular signalling	;TPR_1;TPR_2;TPR_1;TPR_2;TPR_1;TPR_2;PPP5;Metallophos;	Non-secretory protein	E_Evol	E_Evol	E_Evol		0
b20d17_060	NCU01434	NCU01434	NCU01434	hypothetical protein	99 UNCLASSIFIED PROTEINS	NULL	Non-secretory protein	F_Evol	F_Evol	F_Evol		0
b20d17_070	NCU01435	NCU01435	NCU01435	related to cyclin dependent kinase C	10 CELL CYCLE AND DNA PROCESSING_10.03 cell cycle_10.03.03 cytokinesis (cell division) /septum formation and hydrolysis_14 PROTEIN FATE (folding, modification, destination)_14.07 protein modification_14.07.03 modification by phosphorylation, dephosphorylation, autophosphorylation_30 CELLULAR COMMUNICATION/SIGNAL TRANSDUCTION MECHANISM_30.01 cellular signalling	;Pkinase;Pkinase_Tyr;GRP;	Non-secretory protein	E_Evol	E_Evol	E_Evol		0
b20d17_080	NCU01436	NCU01436	NCU01436	questionable protein	99 UNCLASSIFIED PROTEINS	NULL	Non-secretory protein	N_Evol	N_Evol	N_Evol		0
b20d17_110	NCU01438	NCU01438	NCU01438	probable nucleosome assembly protein I	10 CELL CYCLE AND DNA PROCESSING_10.03 cell cycle_10.03.03 cytokinesis (cell division) /septum formation and hydrolysis_14 PROTEIN FATE (folding, modification, destination)_14.10 assembly of protein complexes_16 PROTEIN WITH BINDING FUNCTION OR COFACTOR REQUIREMENT (structural or catalytic)_16.01 protein binding_70 SUBCELLULAR LOCALIZATION_70.10 nucleus	;DMAP_binding;W2;NAP;	Non-secretory protein	E_Evol	E_Evol	E_Evol		0
b20d17_150	NCU01441	NCU01441	NCU01441	probable inosine triphosphate pyrophosphatase	01 METABOLISM_01.03 nucleotide/nucleoside/nucleobase metabolism_01.03.01 purin nucleotide/nucleoside/nucleobase metabolism	;Ham1p_like;	Non-secretory protein	E_Evol	E_Evol	E_Evol		0
b20d17_160	NCU01442	NCU01442	NCU01442	conserved hypothetical protein	99 UNCLASSIFIED PROTEINS	;DUF1671;	Non-secretory protein	F_Evol	F_Evol	F_Evol		0
b20d17_180	NCU01443	NCU01443	NCU01443	probable serine-tRNA ligase, cytosolic	12 PROTEIN SYNTHESIS_12.10 aminoacyl-tRNA-synthetases_70 SUBCELLULAR LOCALIZATION_70.03 cytoplasm	;Seryl_tRNA_N;NifZ;tRNA-synt_2b;	Non-secretory protein	E_Evol	E_Evol	E_Evol		0
b20d17_190	NCU01444	NCU01444	NCU01444	probable ras-related GTP-binding protein	16 PROTEIN WITH BINDING FUNCTION OR COFACTOR REQUIREMENT (structural or catalytic)_16.19 nucleotide/nucleoside/nucleobase binding_16.19.05 GTP binding_30 CELLULAR COMMUNICATION/SIGNAL TRANSDUCTION MECHANISM_30.01 cellular signalling_30.01.05 enzyme mediated signal transduction_30.01.05.05 G-protein mediated signal transduction	;Arf;MMR_HSR1;Miro;Ras;	Non-secretory protein	E_Evol	E_Evol	E_Evol		0
b20d17_200	NCU01445	NCU01445	NCU01445	hypothetical protein	99 UNCLASSIFIED PROTEINS	;WAPL;	Non-secretory protein	F_Evol	F_Evol	F_Evol		0
b11c21_210	NCU01446	NCU01446	NCU01446	probable uracil phosphoribosyltransferase FUR1	01 METABOLISM_01.03 nucleotide/nucleoside/nucleobase metabolism_01.03.04 pyrimidine nucleotide/nucleoside/nucleobase metabolism	;Pribosyltran;	Non-secretory protein	E_Evol	E_Evol	E_Evol		0
b11c21_200	NCU01447	NCU01447	NCU01447	conserved hypothetical protein	99 UNCLASSIFIED PROTEINS	;Elf1;	Non-secretory protein	E_Evol	E_Evol	B_Evol		0
b11c21_190	NCU01448	NCU01448	NCU01448	hypothetical protein	99 UNCLASSIFIED PROTEINS	NULL	Non-secretory protein	N_Evol	N_Evol	N_Evol		0
b11c21_180	NCU01449	NCU01449	NCU01449	conserved hypothetical protein	99 UNCLASSIFIED PROTEINS	;GTP_cyclohydro2;	Non-secretory protein	E_Evol	E_Evol	E_Evol		0
b11c21_170	NCU01451	NCU01451	NCU01451	related to heterogeneous nuclear ribonucleoprotein g	70 SUBCELLULAR LOCALIZATION_70.10 nucleus	NULL	Non-secretory protein	F_Evol	F_Evol	F_Evol		0
b11c21_160	NCU01452	NCU01452	NCU01452	probable ribosomal protein 10, cytosolic	12 PROTEIN SYNTHESIS_12.01 ribosome biogenesis_12.01.01 ribosomal proteins	;Ribosomal_S3Ae;	Non-secretory protein	E_Evol	E_Evol	E_Evol		0
b11c21_150	NCU01453	NCU01453	NCU01453	related to GTP-binding protein rab18a	16 PROTEIN WITH BINDING FUNCTION OR COFACTOR REQUIREMENT (structural or catalytic)_16.19 nucleotide/nucleoside/nucleobase binding_16.19.05 GTP binding_30 CELLULAR COMMUNICATION/SIGNAL TRANSDUCTION MECHANISM_30.01 cellular signalling	;Arf;Miro;Ras;	Non-secretory protein	E_Evol	E_Evol	O_Evol		0
b11c21_140	NCU01454	NCU01454	NCU01454	conserved hypothetical protein	99 UNCLASSIFIED PROTEINS	;Esterase;PGAP1;Abhydrolase_1;	Signal peptide	E_Evol	E_Evol	B_Evol		0
b11c21_130	NCU01455	NCU01455	NCU01455	related to signal recognition particle 72 kDa protein	14 PROTEIN FATE (folding, modification, destination)_14.04 protein targeting, sorting and translocation	;FdhE;TPR_4;TPR_4;TPR_2;TPR_2;TPR_2;TPR_4;TPR_4;TPR_4;SRP72;	Non-secretory protein	O_Evol	F_Evol	F_Evol		0
b11c21_120	NCU01456	NCU01456	NCU01456	conserved hypothetical protein	99 UNCLASSIFIED PROTEINS	;UAA;MFS_1;DUF6;TPT;Chorion_1;	Non-secretory protein	E_Evol	E_Evol	B_Evol		0
b11c21_100	NCU01457	NCU01457	NCU01457	related to ubiquitin-specific proteinase UBP1	14 PROTEIN FATE (folding, modification, destination)_14.13 protein/peptide degradation	;UCH;	Non-secretory protein	F_Evol	F_Evol	F_Evol		0
b11c21_090	NCU01458	NCU01458	NCU01458	hypothetical protein	99 UNCLASSIFIED PROTEINS	NULL	Non-secretory protein	F_Evol	F_Evol	F_Evol		0
b11c21_080	NCU01459	NCU01459	NCU01459	related to cyclic-amp-dependent transcription factor atf-2	11 TRANSCRIPTION_11.02 RNA synthesis_11.02.03 mRNA synthesis_11.02.03.04 transcriptional control	;DUF536;bZIP_1;bZIP_2;	Non-secretory protein	F_Evol	F_Evol	F_Evol		0
b11c21_050	NCU01460	NCU01460	NCU01460	related to single-stranded DNA binding protein 12k chain	10 CELL CYCLE AND DNA PROCESSING_10.01 DNA processing_10.01.03 DNA synthesis and replication	;Rep_fac-A_3;	Non-secretory protein	B_Evol	B_Evol	A_Evol		0
b11c21_040	NCU01461	NCU01461	NCU01461	conserved hypothetical protein	99 UNCLASSIFIED PROTEINS	;AT_hook;Extensin_2;GATA;	Non-secretory protein	F_Evol	F_Evol	F_Evol		0
b11c21_030	NCU01462	NCU01462	NCU01462	putative protein	99 UNCLASSIFIED PROTEINS	NULL	Signal peptide	N_Evol	N_Evol	N_Evol		0
b11c21_020	NCU01463	NCU01463	NCU01463	hypothetical protein	99 UNCLASSIFIED PROTEINS	;Extensin_2;	Non-secretory protein	F_Evol	F_Evol	F_Evol		0
b11c21_010	NCU01464	NCU01464	NCU01464	related to ECM14 protein	42 BIOGENESIS OF CELLULAR COMPONENTS_42.01 cell wall	;Peptidase_M14;	Signal peptide	E_Evol	A_Evol	F_Evol		0
b11e5_010	NCU01465	NCU01465	NCU01465	related to sec7-domain protein	20 CELLULAR TRANSPORT, TRANSPORT FACILITIES AND TRANSPORT ROUTES_20.09 transport routes_20.09.07 vesicular transport (Golgi network, etc.)	;TP2;Sec7;PH;DUF1509;	Non-secretory protein	F_Evol	F_Evol	F_Evol		0
b11e5_020	NCU01466	NCU01466	NCU01466	hypothetical protein	99 UNCLASSIFIED PROTEINS	;Cps15;DUF1777;	Signal anchor	O_Evol	F_Evol	F_Evol		0
b11e5_030	NCU01467	NCU01467	NCU01467	NADH2 dehydrogenase (ubiquinone) 14K chain NUO-14	02 ENERGY_02.11 electron transport and membrane-associated energy conservation_02.13 respiration_02.13.03 aerobic respiration_70 SUBCELLULAR LOCALIZATION_70.16 mitochondrion	NULL	Signal peptide	B_Evol	F_Evol	F_Evol		0
b11e5_040	NCU01468	NCU01468	NCU01468	related to translation initiation factor eIF-2b delta subunit	12 PROTEIN SYNTHESIS_12.04 translation_12.04.01 translation initiation_12.07 translational control_18 REGULATION OF METABOLISM AND PROTEIN FUNCTION_18.02 regulation of protein activity_18.02.03 guanyl-nucleotide exchange factor (GEF)	;IF-2B;Glycos_transf_2;	Non-secretory protein	E_Evol	E_Evol	B_Evol		0
b11e5_070	NCU01470	NCU01470	NCU01470	probable VAC8 protein	14 PROTEIN FATE (folding, modification, destination)_14.04 protein targeting, sorting and translocation_42 BIOGENESIS OF CELLULAR COMPONENTS_42.25 vacuole or lysosome_70 SUBCELLULAR LOCALIZATION_70.25 vacuole or lysosome	;V-ATPase_H;HEAT_PBS;Adaptin_N;Arm;HEAT;Arm;HEAT;Arm;HEAT;HEAT_PBS;Arm;HEAT;HEAT_PBS;Arm;HEAT;HEAT_PBS;DUF634;Arm;Arm;HEAT;Maf;Arm;Arm;HEAT;	Non-secretory protein	E_Evol	B_Evol	B_Evol		0
b11e5_080	NCU01471	NCU01471	NCU01471	probable nuclear protein SNF4	01 METABOLISM_01.05 C-compound and carbohydrate metabolism_01.05.25 regulation of C-compound and carbohydrate metabolism_18 REGULATION OF METABOLISM AND PROTEIN FUNCTION_18.02 regulation of protein activity_18.02.01 enzymatic activity regulation / enzyme regulator_18.02.01.01 enzyme activator_32 CELL RESCUE, DEFENSE AND VIRULENCE_32.01 stress response_32.01.11 nutrient starvation response_70 SUBC…	;CBS;CBS;	Non-secretory protein	E_Evol	B_Evol	B_Evol		0
b11e5_090	NCU01472	NCU01472	NCU01472	conserved hypothetical protein	99 UNCLASSIFIED PROTEINS	;RhoGAP;DivIVA;Vicilin_N;	Non-secretory protein	F_Evol	N_Evol	N_Evol		0
b11e5_110	NCU01474	NCU01474	NCU01474	related to ribosomal protein YML6, mitochondrial	12 PROTEIN SYNTHESIS_12.01 ribosome biogenesis_12.01.01 ribosomal proteins_70 SUBCELLULAR LOCALIZATION_70.16 mitochondrion	;Ribosomal_L4;	Non-secretory protein	B_Evol	F_Evol	F_Evol		0
b11e5_120	NCU01475	NCU01475	NCU01475	hypothetical protein	99 UNCLASSIFIED PROTEINS	;Vicilin_N;Rox3;	Non-secretory protein	F_Evol	F_Evol	F_Evol		0
b11e5_130	NCU01476	NCU01476	NCU01476	hypothetical protein	99 UNCLASSIFIED PROTEINS	;Extensin_2;DUF676;PGAP1;	Non-secretory protein	F_Evol	F_Evol	F_Evol		0
b11e5_140	NCU01477	NCU01477	NCU01477	hypothetical protein	99 UNCLASSIFIED PROTEINS	;Endomucin;GRP;	Non-secretory protein	F_Evol	F_Evol	F_Evol		0
b11e5_160	NCU01479	NCU01479	NCU01479	matrix AAA protease MAP-1 (mitochondrial) MAP-1	14 PROTEIN FATE (folding, modification, destination)_14.13 protein/peptide degradation_16 PROTEIN WITH BINDING FUNCTION OR COFACTOR REQUIREMENT (structural or catalytic)_16.19 nucleotide/nucleoside/nucleobase binding_16.19.03 ATP binding_70 SUBCELLULAR LOCALIZATION_70.16 mitochondrion	;FtsH_ext;AAA_2;AAA;AAA_5;Peptidase_M41;	Non-secretory protein	E_Evol	E_Evol	E_Evol		0
b11e5_170	NCU01480	NCU01480	NCU01480	related to chloride-bicarbonate anion exchanger AE2	20 CELLULAR TRANSPORT, TRANSPORT FACILITIES AND TRANSPORT ROUTES_20.01 transported compounds (substrates)_20.01.01 ion transport_20.01.01.07 anion transport_20.01.01.07.09 chloride transport_34 INTERACTION WITH THE ENVIRONMENT_34.01 homeostasis_34.01.03 homeostasis of anions_34.01.03.05 homeostasis of chloride	;HCO3_cotransp;MFS_1;	Non-secretory protein	E_Evol	B_Evol	B_Evol		0
4nc675_170	NCU08683	NCU01484	NCU01484	probable GTP-binding protein rho2	16 PROTEIN WITH BINDING FUNCTION OR COFACTOR REQUIREMENT (structural or catalytic)_16.19 nucleotide/nucleoside/nucleobase binding_16.19.05 GTP binding_30 CELLULAR COMMUNICATION/SIGNAL TRANSDUCTION MECHANISM_30.01 cellular signalling_30.01.05 enzyme mediated signal transduction_30.01.05.05 G-protein mediated signal transduction_42 BIOGENESIS OF CELLULAR COMPONENTS_42.01 cell wall	;Arf;MMR_HSR1;Miro;Ras;	Non-secretory protein	E_Evol	E_Evol	E_Evol		0
2nc570_010	NCU01488	NCU01488	NCU01488	hypothetical protein	99 UNCLASSIFIED PROTEINS	NULL	Non-secretory protein	N_Evol	N_Evol	N_Evol		0
2nc570_020	NCU01489	NCU01489	NCU01489	hypothetical protein	99 UNCLASSIFIED PROTEINS	;Hpt;	Non-secretory protein	B_Evol	B_Evol	B_Evol		0
b7n4_010	NCU01490	NCU01490	NCU01490	conserved hypothetical protein	99 UNCLASSIFIED PROTEINS	NULL	Non-secretory protein	F_Evol	F_Evol	N_Evol		0
b7n4_020	NCU01491	NCU01491	NCU01491	hypothetical protein	99 UNCLASSIFIED PROTEINS	NULL	Non-secretory protein	F_Evol	F_Evol	F_Evol		0
b7n4_040	NCU01493	NCU01493	NCU01493	hypothetical protein	99 UNCLASSIFIED PROTEINS	NULL	Non-secretory protein	N_Evol	N_Evol	N_Evol		0
b7n4_050	NCU01494	NCU01494	NCU01494	related to myo-inositol transport protein ITR1	01 METABOLISM_01.05 C-compound and carbohydrate metabolism_01.06 lipid, fatty acid and isoprenoid metabolism_20 CELLULAR TRANSPORT, TRANSPORT FACILITIES AND TRANSPORT ROUTES_20.01 transported compounds (substrates)_20.01.03 C-compound and carbohydrate transport_20.01.13 lipid/fatty acid transport_20.03 transport facilities_20.09 transport routes_20.09.18 cellular import_70 SUBCELLULAR LOCALIZATIO…	;Sugar_tr;MFS_1;	Non-secretory protein	E_Evol	B_Evol	B_Evol		0
b7n4_060	NCU01495	NCU01495	NCU01495	hypothetical protein	99 UNCLASSIFIED PROTEINS	;DUF1777;	Non-secretory protein	N_Evol	N_Evol	N_Evol		0
b7n4_080	NCU01496	NCU01496	NCU01496	hypothetical protein	99 UNCLASSIFIED PROTEINS	NULL	Non-secretory protein	N_Evol	N_Evol	N_Evol		0
b7n4_100	NCU01498	NCU01498	NCU01498	related to ser/thr protein kinase IME2	10 CELL CYCLE AND DNA PROCESSING_10.03 cell cycle_10.03.01 mitotic cell cycle and cell cycle control_10.03.02 meiosis_43 CELL TYPE DIFFERENTIATION_43.01 fungal/microorganismic cell type differentiation_43.01.03 fungal and other eukaryotic cell type differentiation_43.01.03.09 development of asco- basidio- or zygospore	;Pkinase;Pkinase_Tyr;	Non-secretory protein	E_Evol	F_Evol	F_Evol		0
b5o22_270	NCU01500	NCU01500	NCU01500	conserved hypothetical protein	99 UNCLASSIFIED PROTEINS	;ABC_tran;	Non-secretory protein	A_Evol	F_Evol	F_Evol		0
b5o22_260	NCU01501	NCU01501	NCU01501	conserved hypothetical protein	99 UNCLASSIFIED PROTEINS	;PTH2;	Non-secretory protein	E_Evol	E_Evol	B_Evol		0
b5o22_250	NCU01502	NCU01502	NCU01502	conserved hypothetical protein	99 UNCLASSIFIED PROTEINS	;DUF437;WD40;WD40;WD40;BING4CT;	Non-secretory protein	E_Evol	E_Evol	E_Evol		0
b5o22_240	NCU01503	NCU01503	NCU01503	conserved hypothetical protein	99 UNCLASSIFIED PROTEINS	;AARP2CN;Nucleoplasmin;DUF663;	Non-secretory protein	E_Evol	E_Evol	B_Evol		0
b5o22_230	NCU01504	NCU01504	NCU01504	related to nebula protein	10 CELL CYCLE AND DNA PROCESSING_10.03 cell cycle_10.03.02 meiosis	;Calcipressin;	Non-secretory protein	F_Evol	F_Evol	F_Evol		0
b5o22_200	NCU01505	NCU01505	NCU01505	conserved hypothetical protein	99 UNCLASSIFIED PROTEINS	NULL	Non-secretory protein	F_Evol	F_Evol	N_Evol		0
b5o22_190	NCU01506	NCU01506	NCU01506	conserved hypothetical protein	99 UNCLASSIFIED PROTEINS	NULL	Non-secretory protein	F_Evol	F_Evol	F_Evol		0
b5o22_150	NCU01509	NCU01509	NCU01509	related to glucan 1,4-alpha-glucosidase	01 METABOLISM_01.05 C-compound and carbohydrate metabolism	;Coiled;	Non-secretory protein	F_Evol	F_Evol	N_Evol		0
b5o22_140	NCU01510	NCU01510	NCU01510	conserved hypothetical protein	98 CLASSIFICATION NOT YET CLEAR-CUT	;C2;C2;	Non-secretory protein	B_Evol	B_Evol	A_Evol		0
b5o22_130	NCU01511	NCU01511	NCU01511	probable Ni-binding urease accessory protein (UreG)	01 METABOLISM_01.02 nitrogen, sulfur and selenium metabolism	;ArgK;cobW;MMR_HSR1;Fer4_NifH;	Non-secretory protein	E_Evol	E_Evol	E_Evol		0
b5o22_120	NCU01512	NCU01512	NCU01512	related to mitochondrial phenylalanyl-tRNA synthetase (MSF1)	12 PROTEIN SYNTHESIS_12.10 aminoacyl-tRNA-synthetases_70 SUBCELLULAR LOCALIZATION_70.16 mitochondrion	;tRNA-synt_2d;FDX-ACB;	Non-secretory protein	E_Evol	E_Evol	E_Evol		0
b5o22_090	NCU01515	NCU01515	NCU01515	probable DNA-directed RNA polymerase II chain RPB3	11 TRANSCRIPTION_11.02 RNA synthesis_11.02.03 mRNA synthesis	;RNA_pol_L;RNA_pol_A_bac;	Non-secretory protein	E_Evol	E_Evol	E_Evol		0
b5o22_080	NCU01516	NCU01516	NCU01516	probable heat shock protein MGE1 precursor	14 PROTEIN FATE (folding, modification, destination)_14.01 protein folding and stabilization_32 CELL RESCUE, DEFENSE AND VIRULENCE_32.01 stress response	;SURF6;GrpE;	Non-secretory protein	E_Evol	E_Evol	E_Evol		0
b5o22_070	NCU01517	NCU01517	NCU01517	glucan 1,4-alpha-glucosidase	01 METABOLISM_01.05 C-compound and carbohydrate metabolism_01.05.02 sugar, glucoside, polyol and carboxylate metabolism_01.05.02.07 sugar, glucoside, polyol and carboxylate catabolism_01.05.03 polysaccharide metabolism	;Glyco_hydro_15;CBM_20;	Signal peptide	E_Evol	B_Evol	B_Evol		0
b5o22_020	NCU01520	NCU01520	NCU01520	conserved hypothetical protein	99 UNCLASSIFIED PROTEINS	NULL	Non-secretory protein	N_Evol	N_Evol	N_Evol		0
b5o22_010	NCU01521	NCU01521	NCU01521	conserved hypothetical protein	98 CLASSIFICATION NOT YET CLEAR-CUT	;DJ-1_PfpI;	Signal peptide	E_Evol	B_Evol	F_Evol		0
b9g16_010	NCU01522	NCU01522	NCU01522	hypothetical protein	99 UNCLASSIFIED PROTEINS	;Chromo;	Non-secretory protein	F_Evol	F_Evol	F_Evol		0
b9g16_020	NCU01523	NCU01523	NCU01523	probable GTP-binding protein Drab11	16 PROTEIN WITH BINDING FUNCTION OR COFACTOR REQUIREMENT (structural or catalytic)_16.19 nucleotide/nucleoside/nucleobase binding_16.19.05 GTP binding_30 CELLULAR COMMUNICATION/SIGNAL TRANSDUCTION MECHANISM_30.01 cellular signalling	;Arf;MMR_HSR1;Miro;Ras;GTP_EFTU;	Non-secretory protein	E_Evol	E_Evol	E_Evol		0
b9g16_030	NCU01524	NCU01524	NCU01524	conserved hypothetical protein	99 UNCLASSIFIED PROTEINS	;Brix;	Non-secretory protein	E_Evol	E_Evol	E_Evol		0
b9g16_040	NCU01525	NCU01525	NCU01525	related to histone deacetylase A	11 TRANSCRIPTION_11.02 RNA synthesis_11.02.03 mRNA synthesis_11.02.03.04 transcriptional control	;Hist_deacetyl;Beny_P26;	Non-secretory protein	B_Evol	B_Evol	A_Evol		0
b9g16_050	NCU01526	NCU01526	NCU01526	hypothetical protein	99 UNCLASSIFIED PROTEINS	NULL	Signal peptide	N_Evol	N_Evol	N_Evol		0
b9g16_060	NCU01527	NCU01527	NCU01527	hypothetical protein	99 UNCLASSIFIED PROTEINS	;Extensin_2;	Signal anchor	F_Evol	F_Evol	F_Evol		0
b9g16_070	NCU01528	NCU01528	NCU01528	glyceraldehyde 3-phosphate dehydrogenase (ccg-7) CCG-7	02 ENERGY_02.01 glycolysis and gluconeogenesis	;DapB_N;Gp_dh_N;Semialdhyde_dh;Gp_dh_C;	Non-secretory protein	E_Evol	E_Evol	E_Evol		0
b9g16_080	NCU01529	NCU01529	NCU01529	hypothetical protein	99 UNCLASSIFIED PROTEINS	NULL	Non-secretory protein	N_Evol	N_Evol	N_Evol		0
b24g3_010	NCU01530	NCU01530	NCU01530	hypothetical protein	99 UNCLASSIFIED PROTEINS	NULL	Non-secretory protein	N_Evol	N_Evol	N_Evol		0
b24g3_020	NCU01531	NCU01531	NCU01531	hypothetical protein	99 UNCLASSIFIED PROTEINS	;Extensin_2;	Non-secretory protein	N_Evol	N_Evol	N_Evol		0
b24g3_030	NCU01532	NCU01532	NCU01532	putative protein	99 UNCLASSIFIED PROTEINS	NULL	Non-secretory protein	N_Evol	N_Evol	N_Evol		0
b24g3_040	NCU01534	NCU01534	NCU01534	conserved hypothetical protein	99 UNCLASSIFIED PROTEINS	;BSP_II;Sda;PAPA-1;	Non-secretory protein	F_Evol	F_Evol	F_Evol		0
b24g3_060	NCU01536	NCU01536	NCU01536	hypothetical protein	99 UNCLASSIFIED PROTEINS	NULL	Non-secretory protein	N_Evol	N_Evol	N_Evol		0
b24g3_065	NCU01537	NCU01537	NCU01537	hypothetical protein	99 UNCLASSIFIED PROTEINS	NULL	Non-secretory protein	N_Evol	N_Evol	N_Evol		0
b24g3_070	NCU01538	NCU01538	NCU01538	related to ATROPHIN-1	98 CLASSIFICATION NOT YET CLEAR-CUT	;Extensin_2;Vicilin_N;MAP7;GRP;	Non-secretory protein	F_Evol	F_Evol	F_Evol		0
b24g3_080	NCU01539	NCU01539	NCU01539	conserved hypothetical protein	99 UNCLASSIFIED PROTEINS	;CNH;Mad3_BUB1_I;	Non-secretory protein	B_Evol	F_Evol	F_Evol		0
b24g3_110	NCU01541	NCU01541	NCU01541	putative protein	99 UNCLASSIFIED PROTEINS	;Gon7;	Non-secretory protein	F_Evol	F_Evol	F_Evol		0
b24g3_140	NCU01543	NCU01543	NCU01543	conserved hypothetical protein	99 UNCLASSIFIED PROTEINS	;LIM_bind;	Non-secretory protein	B_Evol	F_Evol	F_Evol		0
b24g3_150	NCU01545	NCU01545	NCU01545	probable autophagy protein AUT7	14 PROTEIN FATE (folding, modification, destination)_14.13 protein/peptide degradation_14.13.04 lysosomal and vacuolar protein degradation_20 CELLULAR TRANSPORT, TRANSPORT FACILITIES AND TRANSPORT ROUTES_20.09 transport routes_20.09.14 cytoskeleton-dependent transport_70 SUBCELLULAR LOCALIZATION_70.03 cytoplasm	;MAP1_LC3;APG12;	Non-secretory protein	E_Evol	E_Evol	E_Evol		0
b24g3_160	NCU01546	NCU01546	NCU01546	probable coproporphyrinogen oxidase precursor	01 METABOLISM_01.20 secondary metabolism_01.20.19 metabolism of secondary products derived from glycine, L-serine and L-alanine_01.20.19.01 metabolism of porphyrins	;Coprogen_oxidas;	Non-secretory protein	E_Evol	E_Evol	E_Evol		0
b24g3_180	NCU01547	NCU01547	NCU01547	probable 26S proteasome regulatory subunit RPN8	14 PROTEIN FATE (folding, modification, destination)_14.13 protein/peptide degradation_70 SUBCELLULAR LOCALIZATION_70.07 endoplasmic reticulum_70.10 nucleus	;Mov34;	Non-secretory protein	E_Evol	E_Evol	E_Evol		0
b24g3_210	NCU01549	NCU01549	NCU01549	related to hook3 protein	20 CELLULAR TRANSPORT, TRANSPORT FACILITIES AND TRANSPORT ROUTES_20.09 transport routes_20.09.07 vesicular transport (Golgi network, etc.)_20.09.14 cytoskeleton-dependent transport_70 SUBCELLULAR LOCALIZATION_70.08 Golgi	;HOOK;Myosin_tail_1;DSL1;DUF612;ATG16;DHC_N2;Filament;Spc7;Phage_GP20;HisKA;EzrA;M;M;DUF827;Prefoldin_2;M;M;	Non-secretory protein	F_Evol	F_Evol	F_Evol		0
b21o8_010	NCU01550	NCU01550	NCU01550	probable adenylate kinase	01 METABOLISM_01.03 nucleotide/nucleoside/nucleobase metabolism_70 SUBCELLULAR LOCALIZATION_70.03 cytoplasm	;ADK;ADK_lid;	Non-secretory protein	E_Evol	E_Evol	E_Evol		0
b21o8_030	NCU01552	NCU01552	NCU01552	probable ribosomal protein S28	12 PROTEIN SYNTHESIS_12.01 ribosome biogenesis_70 SUBCELLULAR LOCALIZATION_70.03 cytoplasm	;Ribosomal_S12;	Non-secretory protein	E_Evol	E_Evol	E_Evol		0
b21o8_040	NCU01553	NCU01553	NCU01553	related to para-hydroxybenzoate polyprenyltransferase precursor	01 METABOLISM_01.07 metabolism of vitamins, cofactors, and prosthetic groups_01.07.01 biosynthesis of vitamins, cofactors, and prosthetic groups_70 SUBCELLULAR LOCALIZATION_70.16 mitochondrion	;UbiA;	Non-secretory protein	E_Evol	E_Evol	E_Evol		0
b21o8_050	NCU01554	NCU01554	NCU01554	related to c-module-binding factor	98 CLASSIFICATION NOT YET CLEAR-CUT	;JmjC;zf-HYPF;PHD;FCP1_C;DUF1531;Extensin_2;AT_hook;AT_hook;AT_hook;AT_hook;	Non-secretory protein	F_Evol	F_Evol	F_Evol		0
b21o8_060	NCU01555	NCU01555	NCU01555	putative protein	99 UNCLASSIFIED PROTEINS	NULL	Signal peptide	B_Evol	F_Evol	F_Evol		0
b21o8_090	NCU01559	NCU01559	NCU01559	conserved hypothetical protein	99 UNCLASSIFIED PROTEINS	NULL	Non-secretory protein	F_Evol	F_Evol	F_Evol		0
b21o8_110	NCU01560	NCU01560	NCU01560	putative protein	99 UNCLASSIFIED PROTEINS	NULL	Non-secretory protein	N_Evol	N_Evol	N_Evol		0
b21o8_120	NCU01561	NCU01561	NCU01561	related to MigA protein	98 CLASSIFICATION NOT YET CLEAR-CUT	NULL	Non-secretory protein	N_Evol	N_Evol	N_Evol		0
b21o8_130	NCU01562	NCU01562	NCU01562	related to 2,4-dichlorophenoxyacetate dioxygenase	01 METABOLISM_01.05 C-compound and carbohydrate metabolism	;TauD;	Non-secretory protein	E_Evol	E_Evol	B_Evol		0
b21o8_140	NCU01563	NCU01563	NCU01563	related to cyclin homolog UME3	01 METABOLISM_01.05 C-compound and carbohydrate metabolism_01.05.25 regulation of C-compound and carbohydrate metabolism_10 CELL CYCLE AND DNA PROCESSING_10.03 cell cycle_10.03.02 meiosis_11 TRANSCRIPTION_11.02 RNA synthesis_11.02.03 mRNA synthesis_11.02.03.01 general transcription activities_70 SUBCELLULAR LOCALIZATION_70.10 nucleus	;Cyclin_N;	Non-secretory protein	E_Evol	F_Evol	F_Evol		0
b21o8_150	NCU01564	NCU01564	NCU01564	related to peroxisomal Ca-dependent solute carrier protein	20 CELLULAR TRANSPORT, TRANSPORT FACILITIES AND TRANSPORT ROUTES_20.03 transport facilities_70 SUBCELLULAR LOCALIZATION_70.16 mitochondrion_70.19 peroxisome	;efhand;efhand;efhand;efhand;Mito_carr;Mito_carr;Mito_carr;	Non-secretory protein	E_Evol	E_Evol	F_Evol		0
b2o8_430	NCU01565	NCU01565	NCU01565	hypothetical protein	99 UNCLASSIFIED PROTEINS	NULL	Non-secretory protein	F_Evol	F_Evol	N_Evol		0
b2o8_420	NCU01566	NCU01566	NCU01566	putative protein	99 UNCLASSIFIED PROTEINS	NULL	Non-secretory protein	N_Evol	N_Evol	N_Evol		0
b2o8_410	NCU01567	NCU01567	NCU01567	conserved hypothetical protein	99 UNCLASSIFIED PROTEINS	;Extensin_2;	Non-secretory protein	O_Evol	N_Evol	N_Evol		0
b2o8_400	NCU01568	NCU01568	NCU01568	related to PET8 protein	20 CELLULAR TRANSPORT, TRANSPORT FACILITIES AND TRANSPORT ROUTES_20.09 transport routes_20.09.04 mitochondrial transport	;Mito_carr;Mito_carr;Mito_carr;	Signal peptide	E_Evol	E_Evol	E_Evol		0
b2o8_390	NCU01569	NCU01569	NCU01569	conserved hypothetical protein	98 CLASSIFICATION NOT YET CLEAR-CUT	;WD40;WD40;WD40;WD40;WD40;WD40;	Non-secretory protein	B_Evol	A_Evol	F_Evol		0
b2o8_380	NCU01570	NCU01570	NCU01570	conserved hypothetical protein	99 UNCLASSIFIED PROTEINS	;ATP_bind_3;Acyl-CoA_dh_N;	Non-secretory protein	F_Evol	F_Evol	F_Evol		0
b2o8_370	NCU01571	NCU01571	NCU01571	related to geranylgeranyl transferase alpha chain	01 METABOLISM_01.06 lipid, fatty acid and isoprenoid metabolism_14 PROTEIN FATE (folding, modification, destination)_14.07 protein modification	;PPTA;PPTA;PPTA;PPTA;PPTA;	Non-secretory protein	B_Evol	B_Evol	F_Evol		0
b2o8_360	NCU01572	NCU01572	NCU01572	related to fzr protein	11 TRANSCRIPTION_11.02 RNA synthesis_11.02.03 mRNA synthesis_11.02.03.04 transcriptional control	;WD40;WD40;	Non-secretory protein	B_Evol	F_Evol	F_Evol		0
b2o8_350	NCU01573	NCU01573	NCU01573	related to cytochrome P450	32 CELL RESCUE, DEFENSE AND VIRULENCE_32.07 detoxification_32.07.01 detoxification involving cytochrome P450	;p450;	Signal peptide	F_Evol	F_Evol	F_Evol		0
b2o8_340	NCU01575	NCU01575	NCU01575	related to syntaxin 8	14 PROTEIN FATE (folding, modification, destination)_14.04 protein targeting, sorting and translocation_20 CELLULAR TRANSPORT, TRANSPORT FACILITIES AND TRANSPORT ROUTES_20.09 transport routes_20.09.07 vesicular transport (Golgi network, etc.)	;SNARE;	Non-secretory protein	B_Evol	F_Evol	F_Evol		0
b2o8_330	NCU01577	NCU01577	NCU01577	hypothetical protein	99 UNCLASSIFIED PROTEINS	;Zn_clus;	Non-secretory protein	F_Evol	F_Evol	F_Evol		0
b2o8_320	NCU01579	NCU01579	NCU01579	hypothetical protein	99 UNCLASSIFIED PROTEINS	NULL	Non-secretory protein	N_Evol	N_Evol	N_Evol		0
b2o8_310	NCU01580	NCU01580	NCU01580	related to basic transcription factor 2 (35 kd SU)	11 TRANSCRIPTION_11.02 RNA synthesis_11.02.03 mRNA synthesis_11.02.03.01 general transcription activities	;Tfb4;zf-AN1;	Non-secretory protein	E_Evol	F_Evol	F_Evol		0
b2o8_300	NCU01581	NCU01581	NCU01581	related to mitotic apparatus protein p62	10 CELL CYCLE AND DNA PROCESSING	;Lif1;Leo1;Nha1_C;Peptidase_S21;	Non-secretory protein	F_Evol	F_Evol	N_Evol		0
b2o8_270	NCU01587	NCU01587	NCU01587	related to cofilin	70 SUBCELLULAR LOCALIZATION_70.04 cytoskeleton	;Cofilin_ADF;	Signal peptide	E_Evol	E_Evol	E_Evol		0
b2o8_260	NCU01589	NCU01589	NCU01589	probable heat-shock protein hsp60	14 PROTEIN FATE (folding, modification, destination)_14.01 protein folding and stabilization_14.07 protein modification_32 CELL RESCUE, DEFENSE AND VIRULENCE_32.01 stress response	;Cpn60_TCP1;	Non-secretory protein	E_Evol	E_Evol	E_Evol		0
b2o8_250	NCU01591	NCU01591	NCU01591	related to RNA-binding protein cabeza	11 TRANSCRIPTION	NULL	Non-secretory protein	F_Evol	N_Evol	N_Evol		0
b2o8_240	NCU01592	NCU01592	NCU01592	related to heterokaryon incompatibility protein	34 INTERACTION WITH THE ENVIRONMENT_34.11 cellular sensing and response to external stimulus_34.11.03 chemoperception and response_34.11.03.07 pheromone response, mating-type determination, sex-specific proteins_43 CELL TYPE DIFFERENTIATION_43.01 fungal/microorganismic cell type differentiation_43.01.03 fungal and other eukaryotic cell type differentiation	;HET;	Non-secretory protein	F_Evol	N_Evol	N_Evol	b2o8_230	0
b2o8_230	NCU01593	NCU01593	NCU01593	related to heterokaryon incompatibility protein	34 INTERACTION WITH THE ENVIRONMENT_34.11 cellular sensing and response to external stimulus_34.11.03 chemoperception and response_34.11.03.07 pheromone response, mating-type determination, sex-specific proteins_43 CELL TYPE DIFFERENTIATION_43.01 fungal/microorganismic cell type differentiation_43.01.03 fungal and other eukaryotic cell type differentiation	;HET;	Non-secretory protein	N_Evol	N_Evol	N_Evol	b2o8_240	0
b2o8_220	NCU01595	NCU01595	NCU01595	probable SOF1 protein	11 TRANSCRIPTION_11.02 RNA synthesis_11.02.01 rRNA synthesis_11.04 RNA processing_11.04.01 rRNA processing	;WD40;WD40;WD40;eIF2A;WD40;WD40;WD40;Sof1;	Non-secretory protein	E_Evol	E_Evol	E_Evol		0
b2o8_210	NCU01596	NCU01596	NCU01596	probable 26s proteasome p44.5 protein	14 PROTEIN FATE (folding, modification, destination)_14.13 protein/peptide degradation	;PCI;	Non-secretory protein	E_Evol	E_Evol	E_Evol		0
b2o8_200	NCU01597	NCU01597	NCU01597	related to profilaggrin fragment	98 CLASSIFICATION NOT YET CLEAR-CUT	;AT_hook;AT_hook;MAP7;Extensin_2;	Non-secretory protein	N_Evol	N_Evol	N_Evol		0
b2o8_190	NCU01598	NCU01598	NCU01598	related to 7alpha-cephem-methoxylase P8 chain	01 METABOLISM_01.20 secondary metabolism_01.20.37 metabolism of peptide derived compounds_01.20.37.05 metabolism of beta-lactams	NULL	Non-secretory protein	E_Evol	E_Evol	E_Evol		0
b2o8_180	NCU01599	NCU01599	NCU01599	related to nif-specific regulatory protein	11 TRANSCRIPTION_11.02 RNA synthesis_11.02.03 mRNA synthesis_11.02.03.04 transcriptional control	;Sds3;DUF605;	Non-secretory protein	F_Evol	F_Evol	F_Evol		0
b2o8_170	NCU01601	NCU01601	NCU01601	related to LSM1 protein	11 TRANSCRIPTION_11.02 RNA synthesis_11.02.03 mRNA synthesis_11.04 RNA processing_11.04.03 mRNA processing (splicing, 5'-, 3'-end processing)	;LSM;	Non-secretory protein	E_Evol	F_Evol	F_Evol		0
b2o8_160	NCU01605	NCU01605	NCU01605	probable MOB1 protein	10 CELL CYCLE AND DNA PROCESSING_10.03 cell cycle_10.03.01 mitotic cell cycle and cell cycle control	;Mob1_phocein;	Non-secretory protein	E_Evol	E_Evol	E_Evol		0
b2o8_150	NCU01606	NCU01606	NCU01606	probable oligomycin sensitivity conferring protein (ATP5)	02 ENERGY_02.11 electron transport and membrane-associated energy conservation_02.13 respiration	;OSCP;	Non-secretory protein	E_Evol	E_Evol	E_Evol		0
b2o8_140	NCU01607	NCU01607	NCU01607	conserved hypothetical protein	98 CLASSIFICATION NOT YET CLEAR-CUT	NULL	Non-secretory protein	F_Evol	F_Evol	N_Evol		0
b2o8_130	NCU01608	NCU01608	NCU01608	putative protein	99 UNCLASSIFIED PROTEINS	;Acid_phosphat_A;	Signal peptide	F_Evol	F_Evol	N_Evol		0
b2o8_110	NCU01611	NCU01611	NCU01611	probable carnitine acetyl transferase FacC	01 METABOLISM_01.01 amino acid metabolism	;Carn_acyltransf;FLO_LFY;	Non-secretory protein	E_Evol	B_Evol	B_Evol		0
b2o8_100	NCU01612	NCU01612	NCU01612	probable ATP-binding protein PRP16	11 TRANSCRIPTION_11.02 RNA synthesis_11.02.03 mRNA synthesis_11.04 RNA processing_11.04.03 mRNA processing (splicing, 5'-, 3'-end processing)_11.04.03.01 splicing	;DEAD;Helicase_C;HA2;DUF1605;	Non-secretory protein	E_Evol	E_Evol	E_Evol		0
b2o8_080	NCU01614	NCU01614	NCU01614	related to snRNP protein SMX3	11 TRANSCRIPTION_11.02 RNA synthesis_11.02.03 mRNA synthesis_11.04 RNA processing_11.04.03 mRNA processing (splicing, 5'-, 3'-end processing)_11.04.03.01 splicing	;LSM;	Non-secretory protein	E_Evol	E_Evol	E_Evol		0
b2o8_070	NCU01615	NCU01615	NCU01615	conserved hypothetical protein	98 CLASSIFICATION NOT YET CLEAR-CUT	NULL	Non-secretory protein	F_Evol	F_Evol	F_Evol		0
b2o8_050	NCU01623	NCU01623	NCU01623	related to neurofilament-H protein	98 CLASSIFICATION NOT YET CLEAR-CUT	;AT_hook;AT_hook;AT_hook;DUF1777;	Non-secretory protein	N_Evol	N_Evol	N_Evol		0
b2o8_040	NCU01625	NCU01625	NCU01625	probable excision repair protein rhp3	10 CELL CYCLE AND DNA PROCESSING_10.01 DNA processing_10.01.05 DNA recombination and DNA repair	;DEAD;DEAD_2;DUF1227;	Non-secretory protein	E_Evol	E_Evol	E_Evol		0
b2o8_020	NCU01629	NCU01629	NCU01629	related to epithelial zinc-finger ezf protein	11 TRANSCRIPTION_11.02 RNA synthesis_11.02.03 mRNA synthesis_11.02.03.04 transcriptional control	;Extensin_2;zf-C2H2;zf-C2H2;zf-C2H2;	Non-secretory protein	F_Evol	F_Evol	F_Evol		0
b2o8_010	NCU01631	NCU01631	NCU01631	conserved hypothetical protein	99 UNCLASSIFIED PROTEINS	NULL	Non-secretory protein	N_Evol	N_Evol	N_Evol		0
b14h13_020	NCU01632	NCU01632	NCU01632	probable pentafunctional arom polypeptide	01 METABOLISM_01.01 amino acid metabolism_01.01.09 metabolism of the cysteine - aromatic group	;Fe-ADH;DHQ_synthase;EPSP_synthase;PRK;SKI;DHquinase_I;Shikimate_dh_N;Shikimate_DH;GFO_IDH_MocA;	Non-secretory protein	B_Evol	B_Evol	B_Evol		0
b7k22_010	NCU01633	NCU01633	NCU01633	probable low-affinity hexose transporter HXT3	01 METABOLISM_01.05 C-compound and carbohydrate metabolism_20 CELLULAR TRANSPORT, TRANSPORT FACILITIES AND TRANSPORT ROUTES_20.01 transported compounds (substrates)_20.01.03 C-compound and carbohydrate transport_20.03 transport facilities_20.09 transport routes_20.09.18 cellular import_70 SUBCELLULAR LOCALIZATION_70.02 eukaryotic plasma membrane / membrane attached	;Tim17;MFS_1;Sugar_tr;BPD_transp_1;FeoB_N;	Non-secretory protein	E_Evol	E_Evol	B_Evol		0
b7k22_030	NCU01635	NCU01635	NCU01635	histone H3	11 TRANSCRIPTION_11.02 RNA synthesis_11.02.03 mRNA synthesis_11.02.03.04 transcriptional control_70 SUBCELLULAR LOCALIZATION_70.10 nucleus_70.10.03 chromosome	;Histone;CBFD_NFYB_HMF;	Non-secretory protein	E_Evol	E_Evol	E_Evol		0
b7k22_040	NCU01636	NCU01636	NCU01636	related to glutahione s-transferase subunit 13	32 CELL RESCUE, DEFENSE AND VIRULENCE_32.07 detoxification	;DSBA;	Non-secretory protein	E_Evol	O_Evol	F_Evol		0
b7k22_050	NCU01637	NCU01637	NCU01637	related to U4/U6 small nuclear ribonucleoprotein hPrp3	11 TRANSCRIPTION_11.02 RNA synthesis_11.02.03 mRNA synthesis_11.04 RNA processing_11.04.03 mRNA processing (splicing, 5'-, 3'-end processing)_11.04.03.01 splicing	;PRP3;	Non-secretory protein	E_Evol	E_Evol	B_Evol		0
b7k22_060	NCU01638	NCU01638	NCU01638	probable DNA-directed RNA polymerase I	11 TRANSCRIPTION_11.02 RNA synthesis_11.02.03 mRNA synthesis_11.02.03.01 general transcription activities_70 SUBCELLULAR LOCALIZATION_70.10 nucleus	;RNA_pol_Rpb1_1;DUF1168;Cenp-B_dimeris;RNA_pol_Rpb1_2;RNA_pol_Rpb1_3;RNA_pol_Rpb1_4;RNA_pol_Rpb1_5;	Non-secretory protein	E_Evol	E_Evol	E_Evol		0
3nc250_060	NCU07586	NCU01639	NCU01639	hypothetical protein	99 UNCLASSIFIED PROTEINS	;zf-TRAF;zf-C2H2;zf-C2H2;zf-C2HC;zf-C2H2;zf-C2H2;	Non-secretory protein	N_Evol	N_Evol	N_Evol		0
b7k22_070	NCU01640	NCU01640	NCU01640	related to 26S proteasome subunit RPN4	11 TRANSCRIPTION_11.02 RNA synthesis_11.02.03 mRNA synthesis_11.02.03.04 transcriptional control_14 PROTEIN FATE (folding, modification, destination)_14.13 protein/peptide degradation	;Tis11B_N;zf-C2H2;zf-C2H2;zf-C2H2;	Non-secretory protein	F_Evol	F_Evol	F_Evol		0
b7k22_100	NCU01642	NCU01642	NCU01642	related to neurofibromin	18 REGULATION OF METABOLISM AND PROTEIN FUNCTION_18.02 regulation of protein activity_18.02.05 regulator of G-protein signalling_30 CELLULAR COMMUNICATION/SIGNAL TRANSDUCTION MECHANISM_30.01 cellular signalling_40 CELL FATE_40.01 cell growth / morphogenesis	;HEAT;Gam;RasGAP;HEAT;HEAT;	Non-secretory protein	B_Evol	F_Evol	F_Evol		0
b7k22_110	NCU01643	NCU01643	NCU01643	related to dna exoribonuclease Dhp1p	01 METABOLISM_01.03 nucleotide/nucleoside/nucleobase metabolism_01.03.16 polynucleotide degradation	;XRN_N;zf-CCHC;GRP;	Non-secretory protein	E_Evol	E_Evol	E_Evol		0
b13i18_010	NCU01644	NCU01644	NCU01644	related to transport protein USO1	20 CELLULAR TRANSPORT, TRANSPORT FACILITIES AND TRANSPORT ROUTES_20.09 transport routes_20.09.07 vesicular transport (Golgi network, etc.)_70 SUBCELLULAR LOCALIZATION_70.03 cytoplasm	;ABC_tran;Uso1_p115_head;Myosin_tail_1;Laminin_I;Vicilin_N;Spectrin;Prefoldin_2;GA;Uso1_p115_C;Osmo_CC;	Non-secretory protein	B_Evol	F_Evol	F_Evol		0
b13i18_020	NCU01645	NCU01645	NCU01645	related to rna-binding protein fus/tls	70 SUBCELLULAR LOCALIZATION_70.10 nucleus	;WW;Collagen;	Non-secretory protein	E_Evol	B_Evol	F_Evol		0
b13i18_030	NCU01646	NCU01646	NCU01646	conserved hypothetical protein	99 UNCLASSIFIED PROTEINS	;DUF580;	Non-secretory protein	F_Evol	F_Evol	F_Evol		0
b13i18_050	NCU01648	NCU01648	NCU01648	probable dolichyl-phosphate-mannose--protein mannosyltransferase	01 METABOLISM_01.05 C-compound and carbohydrate metabolism_14 PROTEIN FATE (folding, modification, destination)_14.07 protein modification_70 SUBCELLULAR LOCALIZATION_70.07 endoplasmic reticulum	;PMT;ABC-3;MFS_1;Cornichon;PSS;MIR;	Non-secretory protein	E_Evol	E_Evol	E_Evol		0
b13i18_060	NCU01649	NCU01649	NCU01649	hypothetical protein	99 UNCLASSIFIED PROTEINS	NULL	Non-secretory protein	F_Evol	N_Evol	N_Evol		0
b13i18_070	NCU01650	NCU01650	NCU01650	related to ribosomal protein MRP49	12 PROTEIN SYNTHESIS_12.01 ribosome biogenesis	;L51_S25_CI-B8;	Non-secretory protein	F_Evol	F_Evol	F_Evol		0
b13i18_080	NCU01651	NCU01651	NCU01651	conserved hypothetical protein	99 UNCLASSIFIED PROTEINS	;MMR_HSR1;	Non-secretory protein	F_Evol	F_Evol	F_Evol		0
b13i18_090	NCU01652	NCU01652	NCU01652	probable O-acetylhomoserine (thiol)-lyase	01 METABOLISM_01.01 amino acid metabolism	;Cys_Met_Meta_PP;Aminotran_5;Aminotran_1_2;DegT_DnrJ_EryC1;Beta_elim_lyase;	Non-secretory protein	E_Evol	E_Evol	E_Evol		0
b13i18_100	NCU01653	NCU01653	NCU01653	hypothetical protein	99 UNCLASSIFIED PROTEINS	NULL	Non-secretory protein	F_Evol	F_Evol	F_Evol		0
b13i18_110	NCU01654	NCU01654	NCU01654	related to long-chain-fatty-acid--CoA ligase FAA2	01 METABOLISM_01.06 lipid, fatty acid and isoprenoid metabolism	;AMP-binding;SWIRM;GTPase_binding;	Non-secretory protein	E_Evol	E_Evol	E_Evol		0
b13i18_120	NCU01655	NCU01655	NCU01655	conserved hypothetical protein	99 UNCLASSIFIED PROTEINS	NULL	Signal peptide	F_Evol	F_Evol	F_Evol		0
b13i18_130	NCU01656	NCU01656	NCU01656	conserved hypothetical protein	99 UNCLASSIFIED PROTEINS	;Extensin_2;WD40;WD40;WD40;WD40;	Non-secretory protein	F_Evol	F_Evol	F_Evol		0
b13i18_140	NCU01657	NCU01657	NCU01657	probable cytochrome-c oxidase assembly protein (COX11)	02 ENERGY_02.11 electron transport and membrane-associated energy conservation_02.11.05 accessory proteins of electron transport and membrane-associated energy conservation_02.13 respiration_02.13.03 aerobic respiration_14 PROTEIN FATE (folding, modification, destination)_14.10 assembly of protein complexes_70 SUBCELLULAR LOCALIZATION_70.16 mitochondrion	;CtaG_Cox11;	Non-secretory protein	E_Evol	E_Evol	E_Evol		0
b13i18_150	NCU01658	NCU01658	NCU01658	conserved hypothetical protein	99 UNCLASSIFIED PROTEINS	;WD40;WD40;TPP_enzyme_C;WD40;	Non-secretory protein	B_Evol	F_Evol	F_Evol		0
b13i18_170	NCU01659	NCU01659	NCU01659	conserved hypothetical protein	99 UNCLASSIFIED PROTEINS	;uDENN;DENN;TP2;C1_1;C1_3;C1_2;PHD;dDENN;	Non-secretory protein	F_Evol	F_Evol	F_Evol		0
b1d1_010	NCU01660	NCU01660	NCU01660	putative protein	99 UNCLASSIFIED PROTEINS	NULL	Non-secretory protein	N_Evol	N_Evol	N_Evol		0
b1d1_040	NCU01664	NCU01664	NCU01664	conserved hypothetical protein	99 UNCLASSIFIED PROTEINS	;DUF974;	Non-secretory protein	F_Evol	F_Evol	F_Evol		0
b1d1_050	NCU01665	NCU01665	NCU01665	conserved hypothetical protein	98 CLASSIFICATION NOT YET CLEAR-CUT	;KH_1;Extensin_2;Vicilin_N;	Non-secretory protein	E_Evol	B_Evol	B_Evol		0
b1d1_060	NCU01666	NCU01666	NCU01666	probable acetolactate synthase small subunit precursor	01 METABOLISM_01.01 amino acid metabolism_70 SUBCELLULAR LOCALIZATION_70.16 mitochondrion	;ACT;	Non-secretory protein	B_Evol	B_Evol	B_Evol		0
b1d1_070	NCU01667	NCU01667	NCU01667	probable ornithine carbamoyltransferase precursor	01 METABOLISM_01.01 amino acid metabolism_01.01.05 metabolism of urea cycle, creatine and polyamines	;OTCace_N;OTCace;	Non-secretory protein	E_Evol	E_Evol	E_Evol		0
b1d1_080	NCU01668	NCU01668	NCU01668	hypothetical protein	99 UNCLASSIFIED PROTEINS	NULL	Non-secretory protein	F_Evol	F_Evol	F_Evol		0
b1d1_100	NCU01670	NCU01670	NCU01670	hypothetical protein	99 UNCLASSIFIED PROTEINS	;PPI_Ypi1;	Non-secretory protein	E_Evol	B_Evol	B_Evol		0
b1d1_130	NCU01672	NCU01672	NCU01672	conserved hypothetical protein	98 CLASSIFICATION NOT YET CLEAR-CUT	;DUF726;	Non-secretory protein	F_Evol	F_Evol	F_Evol		0
b1d1_140	NCU01673	NCU01673	NCU01673	related to a-agglutinin core protein AGA1	34 INTERACTION WITH THE ENVIRONMENT_34.11 cellular sensing and response to external stimulus_34.11.03 chemoperception and response_34.11.03.07 pheromone response, mating-type determination, sex-specific proteins_43 CELL TYPE DIFFERENTIATION_43.01 fungal/microorganismic cell type differentiation_43.01.03 fungal and other eukaryotic cell type differentiation_70 SUBCELLULAR LOCALIZATION_70.02 eukary…	NULL	Signal peptide	F_Evol	F_Evol	F_Evol		0
b1d1_150	NCU01674	NCU01674	NCU01674	probable transport vesicle fusion protein SEC17	20 CELLULAR TRANSPORT, TRANSPORT FACILITIES AND TRANSPORT ROUTES_20.09 transport routes_20.09.07 vesicular transport (Golgi network, etc.)_20.09.16 cellular export and secretion_20.09.18 cellular import_70 SUBCELLULAR LOCALIZATION_70.03 cytoplasm_70.09 intracellular transport vesicles	;NSF;TPR_1;TPR_2;NSF;NSF;NSF;TPR_2;NSF;TPR_2;TPR_2;	Non-secretory protein	E_Evol	E_Evol	E_Evol		0
b1d1_160	NCU01675	NCU01675	NCU01675	related to RRP12 - required for normal pre-rRNA processing	98 CLASSIFICATION NOT YET CLEAR-CUT	;HEAT;HEAT;NUC173;HEAT;BUD22;DUF1168;GRP;	Non-secretory protein	E_Evol	B_Evol	A_Evol		0
b1d1_190	NCU01678	NCU01678	NCU01678	conserved hypothetical protein	98 CLASSIFICATION NOT YET CLEAR-CUT	;DAO;Pyr_redox;Amino_oxidase;	Non-secretory protein	E_Evol	E_Evol	B_Evol		0
b1d1_200	NCU01679	NCU01679	NCU01679	related to myocyte-specific enhancer factor 2d	11 TRANSCRIPTION_11.02 RNA synthesis_11.02.03 mRNA synthesis_11.02.03.04 transcriptional control	NULL	Non-secretory protein	F_Evol	F_Evol	N_Evol		0
b1d1_210	NCU01680	NCU01680	NCU01680	H+-transporting ATPase	20 CELLULAR TRANSPORT, TRANSPORT FACILITIES AND TRANSPORT ROUTES_20.03 transport facilities_20.03.22 transport ATPases	;Cation_ATPase_N;E1-E2_ATPase;Hydrolase;	Non-secretory protein	E_Evol	E_Evol	E_Evol		0
b1d1_250	NCU01684	NCU01684	NCU01684	hypothetical protein	99 UNCLASSIFIED PROTEINS	NULL	Non-secretory protein	N_Evol	N_Evol	N_Evol		0
b1d1_270	NCU01686	NCU01686	NCU01686	hypothetical protein	99 UNCLASSIFIED PROTEINS	NULL	Signal peptide	N_Evol	N_Evol	N_Evol		0
b1d1_290	NCU01688	NCU01688	NCU01688	hypothetical protein	99 UNCLASSIFIED PROTEINS	NULL	Non-secretory protein	N_Evol	N_Evol	N_Evol		0
b1d1_300	NCU01689	NCU01689	NCU01689	probable suppressor protein of mitochondrial histone mutant	42 BIOGENESIS OF CELLULAR COMPONENTS_42.16 mitochondrion_70 SUBCELLULAR LOCALIZATION_70.16 mitochondrion	;Mito_carr;Mito_carr;	Non-secretory protein	E_Evol	E_Evol	B_Evol		0
b1d1_330	NCU01692	NCU01692	NCU01692	mitochondrial citrate synthase	02 ENERGY_02.04 glyoxylate cycle_02.10 tricarboxylic-acid pathway (citrate cycle, Krebs cycle, TCA cycle)_70 SUBCELLULAR LOCALIZATION_70.16 mitochondrion	;Citrate_synt;	Non-secretory protein	E_Evol	E_Evol	E_Evol		0
b1d1_380	NCU01695	NCU01695	NCU01695	related to NRD1 protein	11 TRANSCRIPTION_11.02 RNA synthesis_11.02.03 mRNA synthesis_11.02.03.01 general transcription activities_70 SUBCELLULAR LOCALIZATION_70.10 nucleus	;Extensin_2;DUF1777;RRM_1;	Non-secretory protein	A_Evol	A_Evol	F_Evol		0
b1d1_390	NCU01696	NCU01696	NCU01696	related to PCF11 component of pre-mRNA 3`-end processing factor CF I	11 TRANSCRIPTION_11.02 RNA synthesis_11.02.03 mRNA synthesis_11.04 RNA processing_11.04.03 mRNA processing (splicing, 5'-, 3'-end processing)_70 SUBCELLULAR LOCALIZATION_70.10 nucleus	;Extensin_2;	Non-secretory protein	B_Evol	F_Evol	F_Evol		0
61d6_070	NCU01697	NCU01697	NCU01697	hypothetical protein	99 UNCLASSIFIED PROTEINS	NULL	Non-secretory protein	F_Evol	F_Evol	F_Evol		0
61d6_060	NCU01698	NCU01698	NCU01698	conserved hypothetical protein	99 UNCLASSIFIED PROTEINS	;4F5;	Non-secretory protein	E_Evol	E_Evol	E_Evol		0
61d6_040	NCU01700	NCU01700	NCU01700	conserved hypothetical protein	99 UNCLASSIFIED PROTEINS	NULL	Non-secretory protein	F_Evol	F_Evol	F_Evol		0
61d6_030	NCU01701	NCU01701	NCU01701	related to D-ribulokinase	01 METABOLISM_01.05 C-compound and carbohydrate metabolism	;FGGY_N;FGGY_C;	Non-secretory protein	E_Evol	E_Evol	E_Evol		0
b24p11_020	NCU01704	NCU01704	NCU01704	related to dimeric dihydrodiol dehydrogenase	01 METABOLISM__30 CELLULAR COMMUNICATION/SIGNAL TRANSDUCTION MECHANISM__40 CELL FATE_40.02 cell differentiation_40.02.03 activity of intercellular mediators	;GFO_IDH_MocA;Semialdhyde_dh;NAD_binding_3;Nod_GRP;	Non-secretory protein	E_Evol	E_Evol	E_Evol		0
b24p11_030	NCU01705	NCU01705	NCU01705	conserved hypothetical protein	98 CLASSIFICATION NOT YET CLEAR-CUT	;Methyltransf_11;Methyltransf_12;	Non-secretory protein	E_Evol	B_Evol	F_Evol		0
b24p11_050	NCU01706	NCU01706	NCU01706	related to DRPLA protein	98 CLASSIFICATION NOT YET CLEAR-CUT	;Myb_DNA-binding;Caudal_act;	Non-secretory protein	F_Evol	F_Evol	F_Evol		0
b24p11_090	NCU01710	NCU01710	NCU01710	hypothetical protein	99 UNCLASSIFIED PROTEINS	NULL	Non-secretory protein	N_Evol	N_Evol	N_Evol		0
b24p11_120	NCU01713	NCU01713	NCU01713	probable Alp11 homologue of tubulin-folding cofactor B	43 CELL TYPE DIFFERENTIATION_43.01 fungal/microorganismic cell type differentiation_43.01.03 fungal and other eukaryotic cell type differentiation_43.01.03.05 budding, cell polarity and filament formation	;CAP_GLY;	Non-secretory protein	E_Evol	E_Evol	E_Evol		0
b24p11_150	NCU01715	NCU01715	NCU01715	conserved hypothetical protein	99 UNCLASSIFIED PROTEINS	;zf-MIZ;PHD;zf-C3HC4;zf-RING-like;	Signal peptide	F_Evol	F_Evol	F_Evol		0
b24p11_210	NCU01720	NCU01720	NCU01720	conserved hypothetical protein	99 UNCLASSIFIED PROTEINS	;DUF638;	Signal peptide	E_Evol	A_Evol	F_Evol		0
b24p11_240	NCU01722	NCU01722	NCU01722	related to suppressor protein SPT23	10 CELL CYCLE AND DNA PROCESSING_10.01 DNA processing_10.01.09 DNA restriction or modification_10.01.09.05 DNA conformation modification (e.g. chromatin)_70 SUBCELLULAR LOCALIZATION_70.10 nucleus	;Extensin_2;TIG;Ank;Ank;	Non-secretory protein	F_Evol	F_Evol	F_Evol		0
b24h17_280	NCU01724	NCU01724	NCU01724	related to Na+/H+-exchanging protein	20 CELLULAR TRANSPORT, TRANSPORT FACILITIES AND TRANSPORT ROUTES_20.01 transported compounds (substrates)_20.01.01 ion transport_20.01.01.01 cation transport (H+, Na+, K+, Ca2+ , NH4+, etc.)_20.03 transport facilities_34 INTERACTION WITH THE ENVIRONMENT_34.01 homeostasis_34.01.01 homeostasis of cations	;Colicin_V;Na_H_Exchanger;	Non-secretory protein	B_Evol	B_Evol	F_Evol		0
b24h17_260	NCU01725	NCU01725	NCU01725	conserved hypothetical protein	99 UNCLASSIFIED PROTEINS	;dCMP_cyt_deam_1;	Non-secretory protein	F_Evol	F_Evol	F_Evol		0
b24h17_250	NCU01726	NCU01726	NCU01726	hypothetical protein	99 UNCLASSIFIED PROTEINS	NULL	Non-secretory protein	N_Evol	N_Evol	N_Evol		0
b24h17_230	NCU01728	NCU01728	NCU01728	related to 6-phosphofructo-2-kinase	02 ENERGY_02.01 glycolysis and gluconeogenesis	;6PF2K;PGAM;	Non-secretory protein	E_Evol	A_Evol	A_Evol		0
b24h17_210	NCU01729	NCU01729	NCU01729	conserved hypothetical protein	99 UNCLASSIFIED PROTEINS	;Extensin_2;Herpes_ICP4_N;Wound_ind;	Non-secretory protein	N_Evol	N_Evol	N_Evol		0
b24h17_190	NCU01731	NCU01731	NCU01731	related to VeA protein	34 INTERACTION WITH THE ENVIRONMENT_34.11 cellular sensing and response to external stimulus_34.11.03 chemoperception and response_34.11.03.07 pheromone response, mating-type determination, sex-specific proteins_43 CELL TYPE DIFFERENTIATION_43.01 fungal/microorganismic cell type differentiation_43.01.03 fungal and other eukaryotic cell type differentiation	;Extensin_2;	Non-secretory protein	B_Evol	F_Evol	F_Evol		0
b24h17_150	NCU01735	NCU01735	NCU01735	related to YRO2 protein	32 CELL RESCUE, DEFENSE AND VIRULENCE_32.01 stress response	;Bac_rhodopsin;	Non-secretory protein	B_Evol	B_Evol	B_Evol		0
b24h17_130	NCU01737	NCU01737	NCU01737	conserved hypothetical protein	99 UNCLASSIFIED PROTEINS	;Arm;HEAT;Arm;HEAT;IGF2_C;Arm;HEAT;	Non-secretory protein	F_Evol	F_Evol	F_Evol		0
b24h17_110	NCU01739	NCU01739	NCU01739	putative protein	99 UNCLASSIFIED PROTEINS	NULL	Signal peptide	B_Evol	F_Evol	F_Evol		0
b24h17_100	NCU01740	NCU01740	NCU01740	conserved hypothetical protein	99 UNCLASSIFIED PROTEINS	NULL	Non-secretory protein	B_Evol	B_Evol	F_Evol		0
b24h17_090	NCU01741	NCU01741	NCU01741	related to BET1 protein	20 CELLULAR TRANSPORT, TRANSPORT FACILITIES AND TRANSPORT ROUTES_20.09 transport routes_20.09.07 vesicular transport (Golgi network, etc.)_70 SUBCELLULAR LOCALIZATION_70.08 Golgi	;GRP;SNARE;	Non-secretory protein	B_Evol	B_Evol	F_Evol		0
b24h17_080	NCU01742	NCU01742	NCU01742	conserved hypothetical protein	99 UNCLASSIFIED PROTEINS	;Vicilin_N;	Non-secretory protein	F_Evol	F_Evol	N_Evol		0
b24h17_040	NCU01744	NCU01744	NCU01744	probable glutamate synthase (NADPH)	01 METABOLISM_01.01 amino acid metabolism_01.01.03 assimilation of ammonia, metabolism of the glutamate group	;GATase_2;Glu_syn_central;Glu_synthase;GXGXG;Thi4;Shikimate_DH;AlaDh_PNT_C;ADH_zinc_N;3HCDH_N;HI0933_like;DAO;FAD_binding_2;Pyr_redox;Pyr_redox_2;	Non-secretory protein	E_Evol	E_Evol	E_Evol		0
b24h17_030	NCU01745	NCU01745	NCU01745	conserved hypothetical protein	99 UNCLASSIFIED PROTEINS	;SPX;DUF202;	Non-secretory protein	B_Evol	B_Evol	A_Evol		0
b24h17_020	NCU01746	NCU01746	NCU01746	conserved hypothetical protein	99 UNCLASSIFIED PROTEINS	NULL	Non-secretory protein	F_Evol	F_Evol	F_Evol		0
b24h17_010	NCU01747	NCU01747	NCU01747	related to multifunctional cyclin-dependent kinase PHO85	01 METABOLISM_01.04 phosphate metabolism_01.04.04 regulation of phosphate metabolism_01.05 C-compound and carbohydrate metabolism_01.05.25 regulation of C-compound and carbohydrate metabolism_10 CELL CYCLE AND DNA PROCESSING_10.03 cell cycle_10.03.01 mitotic cell cycle and cell cycle control_14 PROTEIN FATE (folding, modification, destination)_14.07 protein modification_14.07.03 modification by p…	;SPX;Ank;Ank;Ank;Ank;Ank;GDPD;	Non-secretory protein	B_Evol	A_Evol	A_Evol		0
b17c10_290	NCU01748	NCU01748	NCU01748	putative protein	99 UNCLASSIFIED PROTEINS	;WW;Extensin_2;	Non-secretory protein	F_Evol	F_Evol	F_Evol		0
b17c10_270	NCU01750	NCU01750	NCU01750	conserved hypothetical protein	20 CELLULAR TRANSPORT, TRANSPORT FACILITIES AND TRANSPORT ROUTES_20.03 transport facilities_20.03.25 ABC transporters	NULL	Signal peptide	F_Evol	F_Evol	F_Evol		0
b17c10_260	NCU01751	NCU01751	NCU01751	related to adrenoleukodystrophy protein	98 CLASSIFICATION NOT YET CLEAR-CUT	;ABC_membrane_2;SbmA_BacA;ABC_tran;AAA_5;	Non-secretory protein	E_Evol	E_Evol	E_Evol		0
b17c10_250	NCU01752	NCU01752	NCU01752	related to lustrin A	98 CLASSIFICATION NOT YET CLEAR-CUT	;DUF140;MFS_1;Neuromodulin;	Signal peptide	F_Evol	F_Evol	F_Evol		0
b17c10_210	NCU01754	NCU01754	NCU01754	alcohol dehydrogenase I - ADH1	02 ENERGY_02.01 glycolysis and gluconeogenesis_02.16 fermentation_02.16.01 alcohol fermentation	;ADH_N;Fer4;ACP_syn_III_C;ADH_zinc_N;GFO_IDH_MocA;	Non-secretory protein	E_Evol	E_Evol	E_Evol		0
b17c10_200	NCU01755	NCU01755	NCU01755	hypothetical protein	99 UNCLASSIFIED PROTEINS	NULL	Signal peptide	N_Evol	N_Evol	N_Evol		0
b17c10_190	NCU01756	NCU01756	NCU01756	actin-related protein 3 (ARP3) ARP-3	10 CELL CYCLE AND DNA PROCESSING_10.03 cell cycle_10.03.03 cytokinesis (cell division) /septum formation and hydrolysis_70 SUBCELLULAR LOCALIZATION_70.04 cytoskeleton	;Actin;	Non-secretory protein	E_Evol	E_Evol	E_Evol		0
b17c10_180	NCU01757	NCU01757	NCU01757	related to asparaginase	01 METABOLISM_01.01 amino acid metabolism_01.01.06 metabolism of the aspartate family_01.02 nitrogen, sulfur and selenium metabolism	;Asparaginase_2;	Non-secretory protein	F_Evol	F_Evol	F_Evol		0
b17c10_170	NCU01758	NCU01758	NCU01758	conserved hypothetical protein	99 UNCLASSIFIED PROTEINS	;UPF0061;	Non-secretory protein	E_Evol	E_Evol	A_Evol		0
b17c10_160	NCU01759	NCU01759	NCU01759	related to aldo-keto reductase YPR1	98 CLASSIFICATION NOT YET CLEAR-CUT	;Aldo_ket_red;	Non-secretory protein	E_Evol	E_Evol	E_Evol		0
b17c10_150	NCU01760	NCU01760	NCU01760	conserved hypothetical protein	98 CLASSIFICATION NOT YET CLEAR-CUT	;PUF;PUF;PUF;PUF;PUF;PUF;PUF;PUF;	Non-secretory protein	B_Evol	A_Evol	F_Evol		0
b17c10_140	NCU01761	NCU01761	NCU01761	conserved hypothetical protein	99 UNCLASSIFIED PROTEINS	;Mit_rib_S27;	Non-secretory protein	B_Evol	F_Evol	F_Evol		0
b17c10_130	NCU01762	NCU01762	NCU01762	related to Ribonuclease III	11 TRANSCRIPTION_11.02 RNA synthesis_11.02.01 rRNA synthesis_11.04 RNA processing_11.04.01 rRNA processing	;Ribonuclease_3;BRF1;dsrm;	Non-secretory protein	F_Evol	F_Evol	F_Evol		0
b17c10_120	NCU01763	NCU01763	NCU01763	related to endozepine	20 CELLULAR TRANSPORT, TRANSPORT FACILITIES AND TRANSPORT ROUTES_20.01 transported compounds (substrates)_20.01.13 lipid/fatty acid transport_20.03 transport facilities	;ACBP;	Non-secretory protein	O_Evol	F_Evol	F_Evol		0
b17c10_110	NCU01764	NCU01764	NCU01764	hypothetical protein	99 UNCLASSIFIED PROTEINS	NULL	Non-secretory protein	F_Evol	F_Evol	F_Evol		0
b17c10_090	NCU01765	NCU01765	NCU01765	NADH dehydrogenase (ubiquinone) 78K chain precursor	02 ENERGY_02.13 respiration_02.13.03 aerobic respiration_20 CELLULAR TRANSPORT, TRANSPORT FACILITIES AND TRANSPORT ROUTES_20.01 transported compounds (substrates)_20.01.15 electron transport_20.03 transport facilities_70 SUBCELLULAR LOCALIZATION_70.16 mitochondrion	;Fer2;Molybdopterin;DUF1982;	Non-secretory protein	E_Evol	E_Evol	E_Evol		0
b17c10_080	NCU01766	NCU01766	NCU01766	hypothetical protein	99 UNCLASSIFIED PROTEINS	NULL	Non-secretory protein	F_Evol	F_Evol	F_Evol		0
b17c10_070	NCU01767	NCU01767	NCU01767	related to Type 2C Protein Phosphatase	10 CELL CYCLE AND DNA PROCESSING_10.03 cell cycle_10.03.01 mitotic cell cycle and cell cycle control	;PP2C;	Non-secretory protein	E_Evol	B_Evol	F_Evol		0
b17c10_050	NCU01769	NCU01769	NCU01769	hypothetical protein	99 UNCLASSIFIED PROTEINS	;FtsH_ext;	Non-secretory protein	F_Evol	F_Evol	N_Evol		0
b17c10_030	NCU01771	NCU01771	NCU01771	related to RAD57 protein	10 CELL CYCLE AND DNA PROCESSING_10.01 DNA processing_10.01.05 DNA recombination and DNA repair	;Rad51;GRP;	Non-secretory protein	B_Evol	F_Evol	F_Evol		0
b17c10_020	NCU01772	NCU01772	NCU01772	probable DNA-directed RNA polymerase III second-largest chain	11 TRANSCRIPTION_11.02 RNA synthesis_11.02.02 tRNA synthesis	;RNA_pol_Rpb2_1;RNA_pol_Rpb2_2;SirA;RNA_pol_Rpb2_3;RNA_pol_Rpb2_4;RNA_pol_Rpb2_5;RNA_pol_Rpb2_6;RNA_pol_Rpb2_7;	Non-secretory protein	E_Evol	E_Evol	E_Evol		0
b21d9_010	NCU01774	NCU01774	NCU01774	hypothetical protein	99 UNCLASSIFIED PROTEINS	NULL	Non-secretory protein	F_Evol	F_Evol	F_Evol		0
b21d9_020	NCU01775	NCU01775	NCU01775	conserved hypothetical protein	99 UNCLASSIFIED PROTEINS	;PUF;PUF;PUF;PUF;PUF;PUF;PUF;PUF;	Non-secretory protein	E_Evol	B_Evol	F_Evol		0
b21d9_030	NCU01776	NCU01776	NCU01776	probable ribosomal protein L15.e.B, cytosolic	12 PROTEIN SYNTHESIS_12.01 ribosome biogenesis_70 SUBCELLULAR LOCALIZATION_70.03 cytoplasm	;Ribosomal_L15e;	Non-secretory protein	E_Evol	E_Evol	E_Evol		0
b21d9_055	NCU01778	NCU01778	NCU01778	putative protein	99 UNCLASSIFIED PROTEINS	NULL	Non-secretory protein	N_Evol	N_Evol	N_Evol		0
b21d9_060	NCU01779	NCU01779	NCU01779	related to NFU-1 protein (iron homeostasis)	01 METABOLISM_01.02 nitrogen, sulfur and selenium metabolism_34 INTERACTION WITH THE ENVIRONMENT_34.01 homeostasis_34.01.01 homeostasis of cations_34.01.01.01 homeostasis of metal ions (Na, K, Ca etc.)	;Nfu_N;NifU;	Non-secretory protein	E_Evol	E_Evol	E_Evol		0
b21d9_070	NCU01780	NCU01780	NCU01780	hypothetical protein	99 UNCLASSIFIED PROTEINS	;zf-HIT;zf-MYND;zf-C2H2;	Non-secretory protein	F_Evol	N_Evol	N_Evol		0
b21d9_080	NCU01781	NCU01781	NCU01781	related to nuclear protein sdk2	70 SUBCELLULAR LOCALIZATION_70.10 nucleus	;DUF1079;	Non-secretory protein	N_Evol	N_Evol	N_Evol		0
b21d9_100	NCU01783	NCU01783	NCU01783	conserved hypothetical protein	99 UNCLASSIFIED PROTEINS	NULL	Signal anchor	F_Evol	F_Evol	F_Evol		0
b21d9_125	NCU01785	NCU01785	NCU01785	conserved hypothetical protein	99 UNCLASSIFIED PROTEINS	NULL	Non-secretory protein	E_Evol	O_Evol	F_Evol		0
b21d9_130	NCU01786	NCU01786	NCU01786	related to ribose-phosphate pyrophosphokinase PRS5	01 METABOLISM_01.01 amino acid metabolism_01.03 nucleotide/nucleoside/nucleobase metabolism_01.03.01 purin nucleotide/nucleoside/nucleobase metabolism_01.03.04 pyrimidine nucleotide/nucleoside/nucleobase metabolism	;Pribosyltran;	Non-secretory protein	E_Evol	E_Evol	E_Evol		0
b1k11_210	NCU01790	NCU01790	NCU01790	putative protein	99 UNCLASSIFIED PROTEINS	NULL	Non-secretory protein	F_Evol	F_Evol	F_Evol		0
b1k11_190	NCU01791	NCU01791	NCU01791	related to endosomal Vps protein complex subunit	14 PROTEIN FATE (folding, modification, destination)_14.04 protein targeting, sorting and translocation_20 CELLULAR TRANSPORT, TRANSPORT FACILITIES AND TRANSPORT ROUTES_20.09 transport routes_20.09.13 vacuolar/lysosomal transport_70 SUBCELLULAR LOCALIZATION_70.22 endosome	;DUF1542;Snf7;	Non-secretory protein	E_Evol	E_Evol	E_Evol		0
b1k11_180	NCU01792	NCU01792	NCU01792	related to Hsp90 associated co-chaperone	14 PROTEIN FATE (folding, modification, destination)_14.01 protein folding and stabilization_32 CELL RESCUE, DEFENSE AND VIRULENCE_32.01 stress response	;CS;	Non-secretory protein	E_Evol	E_Evol	E_Evol		0
b1k11_170	NCU01793	NCU01793	NCU01793	related to RNA annealing protein	11 TRANSCRIPTION_11.02 RNA synthesis_11.02.02 tRNA synthesis_11.04 RNA processing_11.04.02 tRNA processing_70 SUBCELLULAR LOCALIZATION_70.10 nucleus	;RRM_1;	Non-secretory protein	E_Evol	E_Evol	B_Evol		0
b1k11_160	NCU01794	NCU01794	NCU01794	hypothetical protein	99 UNCLASSIFIED PROTEINS	NULL	Signal anchor	N_Evol	N_Evol	N_Evol		0
b1k11_150	NCU01795	NCU01795	NCU01795	conserved hypothetical protein	99 UNCLASSIFIED PROTEINS	;zf-CCCH;	Non-secretory protein	E_Evol	E_Evol	E_Evol		0
b1k11_140	NCU01796	NCU01796	NCU01796	putative protein	99 UNCLASSIFIED PROTEINS	;Extensin_2;AT_hook;AT_hook;zf-C2H2;zf-C2H2;	Non-secretory protein	F_Evol	F_Evol	N_Evol		0
b1k11_130	NCU01797	NCU01797	NCU01797	serine/threonine protein kinase NRC-2 NRC-2	14 PROTEIN FATE (folding, modification, destination)_14.07 protein modification_14.07.03 modification by phosphorylation, dephosphorylation, autophosphorylation_30 CELLULAR COMMUNICATION/SIGNAL TRANSDUCTION MECHANISM_30.01 cellular signalling_40 CELL FATE_40.01 cell growth / morphogenesis	;Pkinase;Pkinase_Tyr;	Non-secretory protein	E_Evol	E_Evol	B_Evol		0
b1k11_120	NCU01798	NCU01798	NCU01798	hypothetical protein	99 UNCLASSIFIED PROTEINS	NULL	Non-secretory protein	F_Evol	N_Evol	N_Evol		0
b1k11_110	NCU01799	NCU01799	NCU01799	hypothetical protein	99 UNCLASSIFIED PROTEINS	;DASH_Dad3;	Non-secretory protein	B_Evol	B_Evol	F_Evol		0
b1k11_100	NCU01800	NCU01800	NCU01800	related to ribosomal protein S5 (mitochondrial)	12 PROTEIN SYNTHESIS_12.01 ribosome biogenesis_70 SUBCELLULAR LOCALIZATION_70.16 mitochondrion	;Ribosomal_S5;Ribosomal_S5_C;	Signal peptide	B_Evol	F_Evol	F_Evol		0
b1k11_090	NCU01801	NCU01801	NCU01801	putative protein	99 UNCLASSIFIED PROTEINS	NULL	Signal anchor	F_Evol	F_Evol	F_Evol		0
b1k11_080	NCU01802	NCU01802	NCU01802	hypothetical protein	99 UNCLASSIFIED PROTEINS	;MHC_II_alpha;	Non-secretory protein	N_Evol	N_Evol	N_Evol		0
b1k11_070	NCU01803	NCU01803	NCU01803	related to arginine-tRNA-protein transferase	14 PROTEIN FATE (folding, modification, destination)_14.07 protein modification_14.13 protein/peptide degradation	;ATE_N;ATE_C;	Non-secretory protein	E_Evol	A_Evol	F_Evol		0
b1k11_060	NCU01804	NCU01804	NCU01804	related to diadenosine hexaphosphate hydrolase	32 CELL RESCUE, DEFENSE AND VIRULENCE_32.07 detoxification_32.07.03 detoxification by modification	;NUDIX;	Non-secretory protein	E_Evol	E_Evol	E_Evol		0
b1k11_050	NCU01805	NCU01805	NCU01805	hypothetical protein	99 UNCLASSIFIED PROTEINS	NULL	Non-secretory protein	F_Evol	F_Evol	F_Evol		0
b1k11_040	NCU01806	NCU01806	NCU01806	related to rRNA processing protein	11 TRANSCRIPTION_11.02 RNA synthesis_11.02.01 rRNA synthesis_11.04 RNA processing_11.04.01 rRNA processing	;RNase_PH;	Non-secretory protein	F_Evol	F_Evol	F_Evol		0
b1k11_030	NCU01807	NCU01807	NCU01807	hypothetical protein	99 UNCLASSIFIED PROTEINS	NULL	Non-secretory protein	F_Evol	F_Evol	F_Evol		0
b1k11_020	NCU01808	NCU01808	NCU01808	cytochrome c	02 ENERGY_02.11 electron transport and membrane-associated energy conservation_02.13 respiration_02.13.03 aerobic respiration_20 CELLULAR TRANSPORT, TRANSPORT FACILITIES AND TRANSPORT ROUTES_20.01 transported compounds (substrates)_20.01.15 electron transport_20.03 transport facilities	;Cytochrom_C;	Non-secretory protein	E_Evol	E_Evol	E_Evol		0
b1k11_010	NCU01809	NCU01809	NCU01809	related to nuclear VCP-like protein	42 BIOGENESIS OF CELLULAR COMPONENTS_42.19 peroxisome_70 SUBCELLULAR LOCALIZATION_70.10 nucleus	;BRF1;TrwC;Sigma54_activat;ABC_tran;NACHT;AAA;AAA_3;AAA_5;Zeta_toxin;AAA_2;AAA;SKI;	Non-secretory protein	E_Evol	E_Evol	E_Evol		0
b8b8_140	NCU01810	NCU01810	NCU01810	related to carnitine/acylcarnitine translocase	20 CELLULAR TRANSPORT, TRANSPORT FACILITIES AND TRANSPORT ROUTES_20.09 transport routes_20.09.04 mitochondrial transport_70 SUBCELLULAR LOCALIZATION_70.16 mitochondrion	;Mito_carr;Mito_carr;Mito_carr;	Non-secretory protein	E_Evol	F_Evol	F_Evol		0
b8b8_130	NCU01811	NCU01811	NCU01811	conserved hypothetical protein	99 UNCLASSIFIED PROTEINS	;DUF1763;	Non-secretory protein	N_Evol	N_Evol	N_Evol		0
b8b8_120	NCU01812	NCU01812	NCU01812	hypothetical protein	99 UNCLASSIFIED PROTEINS	NULL	Non-secretory protein	N_Evol	N_Evol	N_Evol		0
b8b8_110	NCU01813	NCU01813	NCU01813	related to sugar transport protein STP1	20 CELLULAR TRANSPORT, TRANSPORT FACILITIES AND TRANSPORT ROUTES_20.01 transported compounds (substrates)_20.01.03 C-compound and carbohydrate transport_20.03 transport facilities_70 SUBCELLULAR LOCALIZATION_70.02 eukaryotic plasma membrane / membrane attached	;Sugar_tr;MFS_1;MgtE;	Non-secretory protein	E_Evol	B_Evol	B_Evol		0
b8b8_090	NCU01814	NCU01814	NCU01814	related to export control protein CHS7	01 METABOLISM_01.05 C-compound and carbohydrate metabolism_01.05.09 aminosaccharide metabolism_01.05.09.04 aminosaccharide anabolism_70 SUBCELLULAR LOCALIZATION_70.07 endoplasmic reticulum	;BioY;Oxidored_q1_N;	Signal anchor	B_Evol	B_Evol	F_Evol		0
b8b8_080	NCU01815	NCU01815	NCU01815	related to cytochrome B561	20 CELLULAR TRANSPORT, TRANSPORT FACILITIES AND TRANSPORT ROUTES_20.01 transported compounds (substrates)_20.01.15 electron transport_20.03 transport facilities_70 SUBCELLULAR LOCALIZATION_70.09 intracellular transport vesicles	;7TMR-DISM_7TM;Cytochrom_B561;	Non-secretory protein	B_Evol	B_Evol	F_Evol		0
b8b8_070	NCU01816	NCU01816	NCU01816	allantoicase	01 METABOLISM_01.03 nucleotide/nucleoside/nucleobase metabolism_01.03.01 purin nucleotide/nucleoside/nucleobase metabolism	;Allantoicase;Allantoicase;	Non-secretory protein	E_Evol	E_Evol	E_Evol		0
b8b8_060	NCU01817	NCU01817	NCU01817	conserved hypothetical protein	99 UNCLASSIFIED PROTEINS	;Ank;Ank;Ank;Lectin_N;DIL;	Non-secretory protein	F_Evol	F_Evol	F_Evol		0
b8b8_030	NCU01818	NCU01818	NCU01818	conserved hypothetical protein	99 UNCLASSIFIED PROTEINS	;Adeno_PX;NRPS;	Non-secretory protein	F_Evol	F_Evol	F_Evol		0
b8b8_020	NCU01819	NCU01819	NCU01819	hypothetical protein	99 UNCLASSIFIED PROTEINS	NULL	Non-secretory protein	N_Evol	N_Evol	N_Evol		0
2nc565_010	NCU01820	NCU01820	NCU01820	probable nuclear export factor CRM1	99 UNCLASSIFIED PROTEINS	;DHC_N1;IBN_N;Xpo1;HEAT;HEAT;CRM1_C;HEAT;	Non-secretory protein	E_Evol	E_Evol	E_Evol		0
2nc565_020	NCU01821	NCU01821	NCU01821	hypothetical protein	99 UNCLASSIFIED PROTEINS	;Aminotran_1_2;Aminotran_5;Cys_Met_Meta_PP;	Non-secretory protein	E_Evol	E_Evol	E_Evol		0
2nc565_030	NCU01822	NCU01822	NCU01822	hypothetical protein	99 UNCLASSIFIED PROTEINS	;Metallophos;	Non-secretory protein	E_Evol	E_Evol	E_Evol		0
2nc565_040	NCU01823	NCU01823	NCU01823	hypothetical protein	99 UNCLASSIFIED PROTEINS	;Pkinase;Pkinase_Tyr;NACHT;TPR_2;TPR_2;TPR_2;TPR_1;TPR_2;GAF;Trans_reg_C;HisKA;HATPase_c;Response_reg;	Non-secretory protein	E_Evol	F_Evol	F_Evol		0
b23g1_210	NCU01824	NCU01824	NCU01824	conserved hypothetical protein	99 UNCLASSIFIED PROTEINS	;DAO;Amino_oxidase;	Non-secretory protein	E_Evol	E_Evol	E_Evol		0
b23g1_200	NCU01826	NCU01826	NCU01826	related to triose phosphate/3-phosphoglycerate/phosphate translocator	20 CELLULAR TRANSPORT, TRANSPORT FACILITIES AND TRANSPORT ROUTES_20.01 transported compounds (substrates)_20.01.03 C-compound and carbohydrate transport_20.03 transport facilities	;UAA;DUF6;TPT;DUF1345;	Non-secretory protein	E_Evol	E_Evol	B_Evol		0
b23g1_190	NCU01827	NCU01827	NCU01827	probable 60S large subunit ribosomal protein	12 PROTEIN SYNTHESIS_12.01 ribosome biogenesis	;KOW;Ribosomal_L27e;	Non-secretory protein	E_Evol	E_Evol	E_Evol		0
b23g1_180	NCU01829	NCU01829	NCU01829	hypothetical protein	99 UNCLASSIFIED PROTEINS	;DUF964;	Non-secretory protein	O_Evol	F_Evol	F_Evol		0
b23g1_170	NCU01830	NCU01830	NCU01830	probable 4-hydroxyphenylpyruvate dioxygenase	01 METABOLISM_01.01 amino acid metabolism_01.01.09 metabolism of the cysteine - aromatic group_01.01.09.01 metabolism of glycine_01.01.09.01.01 biosynthesis of glycine_01.01.09.04 metabolism of phenylalanine_01.01.09.04.01 biosynthesis of phenylalanine_01.01.09.04.02 degradation of phenylalanine_01.01.09.05 metabolism of tyrosine_01.01.09.05.02 degradation of tyrosine	;Glyoxalase;Glyoxalase;	Non-secretory protein	O_Evol	O_Evol	O_Evol		0
b23g1_160	NCU01831	NCU01831	NCU01831	related to transcription factor TFIIH chain p47	11 TRANSCRIPTION_11.02 RNA synthesis_11.02.03 mRNA synthesis_11.02.03.01 general transcription activities	;Ssl1;	Non-secretory protein	E_Evol	E_Evol	B_Evol		0
b23g1_150	NCU01832	NCU01832	NCU01832	hypothetical protein	99 UNCLASSIFIED PROTEINS	NULL	Non-secretory protein	N_Evol	N_Evol	N_Evol		0
b23g1_130	NCU01834	NCU01834	NCU01834	hypothetical protein	99 UNCLASSIFIED PROTEINS	NULL	Signal anchor	N_Evol	N_Evol	N_Evol		0
b23g1_120	NCU01835	NCU01835	NCU01835	putative protein	99 UNCLASSIFIED PROTEINS	NULL	Non-secretory protein	F_Evol	F_Evol	F_Evol		0
b23g1_110	NCU01837	NCU01837	NCU01837	hypothetical protein	99 UNCLASSIFIED PROTEINS	NULL	Non-secretory protein	N_Evol	N_Evol	N_Evol		0
b23g1_090	NCU01839	NCU01839	NCU01839	related to cholinesterase	01 METABOLISM_01.06 lipid, fatty acid and isoprenoid metabolism	;MGC-24;Mucin;COesterase;Abhydrolase_3;	Non-secretory protein	F_Evol	F_Evol	F_Evol		0
b23g1_080	NCU01840	NCU01840	NCU01840	hypothetical protein	99 UNCLASSIFIED PROTEINS	;MAP7;	Non-secretory protein	F_Evol	F_Evol	N_Evol		0
b23g1_070	NCU01841	NCU01841	NCU01841	conserved hypothetical protein	99 UNCLASSIFIED PROTEINS	;DASH_Dad2;	Non-secretory protein	B_Evol	F_Evol	F_Evol		0
b23g1_060	NCU01842	NCU01842	NCU01842	hypothetical protein	99 UNCLASSIFIED PROTEINS	;Shugoshin_N;Prp19;Extensin_2;Shugoshin_C;	Non-secretory protein	F_Evol	F_Evol	F_Evol		0
b23g1_050	NCU01843	NCU01843	NCU01843	probable chaperonin of the TCP1 ring complex	14 PROTEIN FATE (folding, modification, destination)_14.01 protein folding and stabilization	;Cpn60_TCP1;	Non-secretory protein	E_Evol	E_Evol	E_Evol		0
b23g1_040	NCU01844	NCU01844	NCU01844	conserved hypothetical protein	99 UNCLASSIFIED PROTEINS	;DUF1168;	Non-secretory protein	E_Evol	E_Evol	B_Evol		0
b23g1_030	NCU01845	NCU01845	NCU01845	conserved hypothetical protein	99 UNCLASSIFIED PROTEINS	;Acid_phosphat_A;PGAM;	Non-secretory protein	F_Evol	F_Evol	F_Evol		0
1nc305_010	NCU01848	NCU01848	NCU01848	hypothetical protein	99 UNCLASSIFIED PROTEINS	NULL	Signal peptide	N_Evol	N_Evol	N_Evol		0
1nc305_020	NCU01849	NCU01849	NCU01849	conserved hypothetical protein	99 UNCLASSIFIED PROTEINS	;Dioxygenase_C;	Signal peptide	E_Evol	B_Evol	B_Evol		0
1nc305_030	NCU01850	NCU01850	NCU01850	related to peroxisomal membrane protein peroxin 16, pex16	42 BIOGENESIS OF CELLULAR COMPONENTS_42.19 peroxisome_70 SUBCELLULAR LOCALIZATION_70.19 peroxisome	;Pex16;	Non-secretory protein	E_Evol	B_Evol	F_Evol		0
1nc305_040	NCU01851	NCU01851	NCU01851	hypothetical protein	99 UNCLASSIFIED PROTEINS	;SurA_N;	Non-secretory protein	F_Evol	F_Evol	F_Evol		0
1nc305_050	NCU01852	NCU01852	NCU01852	related to arsenite transporter ARR3	20 CELLULAR TRANSPORT, TRANSPORT FACILITIES AND TRANSPORT ROUTES_20.01 transported compounds (substrates)_20.01.01 ion transport_20.01.01.01 cation transport (H+, Na+, K+, Ca2+ , NH4+, etc.)_20.01.01.01.01 heavy metal ion transport (Cu+, Fe3+, etc.)_32 CELL RESCUE, DEFENSE AND VIRULENCE_32.05 disease, virulence and defense_32.05.01 resistance proteins_32.05.01.03 chemical agent resistance_32.05.0…	;MFS_1;SBF;TatC;DUF1753;DUF1774;	Non-secretory protein	E_Evol	E_Evol	E_Evol		0
1nc305_060	NCU01853	NCU01853	NCU01853	probable alcohol oxidase	01 METABOLISM_01.05 C-compound and carbohydrate metabolism	;GMC_oxred_N;GMC_oxred_C;	Non-secretory protein	E_Evol	B_Evol	B_Evol		0
1nc305_070	NCU01854	NCU01854	NCU01854	related to class E vacuolar-protein sorting and endocytosis factor	14 PROTEIN FATE (folding, modification, destination)_14.04 protein targeting, sorting and translocation_20 CELLULAR TRANSPORT, TRANSPORT FACILITIES AND TRANSPORT ROUTES_20.09 transport routes_20.09.13 vacuolar/lysosomal transport_70 SUBCELLULAR LOCALIZATION_70.25 vacuole or lysosome	;Snf7;	Non-secretory protein	E_Evol	O_Evol	F_Evol		0
1nc305_080	NCU01855	NCU01855	NCU01855	conserved hypothetical protein	99 UNCLASSIFIED PROTEINS	;DUF427;	Non-secretory protein	E_Evol	E_Evol	O_Evol		0
1nc307_010	NCU01856	NCU01856	NCU01856	hypothetical protein	99 UNCLASSIFIED PROTEINS	;Cgr1;bZIP_1;bZIP_2;	Non-secretory protein	F_Evol	F_Evol	F_Evol		0
1nc307_020	NCU01857	NCU01857	NCU01857	hypothetical protein	99 UNCLASSIFIED PROTEINS	;ResIII;DEAD;GRP;Helicase_C;DUF1926;DSHCT;ENT;	Non-secretory protein	E_Evol	E_Evol	E_Evol		0
1nc307_030	NCU01858	NCU01858	NCU01858	hypothetical protein	99 UNCLASSIFIED PROTEINS	;Swi3;	Non-secretory protein	F_Evol	F_Evol	F_Evol		0
b13n4_010	NCU01861	NCU01861	NCU01861	related to NAD(P)H-dependent oxidoreductase	01 METABOLISM_01.05 C-compound and carbohydrate metabolism_16 PROTEIN WITH BINDING FUNCTION OR COFACTOR REQUIREMENT (structural or catalytic)_16.21 complex cofactor/cosubstrate/vitamine binding_16.21.07 NAD/NADP binding	;Shikimate_DH;ADH_zinc_N;adh_short;KR;Epimerase;Pro-MCH;	Non-secretory protein	E_Evol	E_Evol	B_Evol		0
b13n4_030	NCU01863	NCU01863	NCU01863	hypothetical protein	99 UNCLASSIFIED PROTEINS	NULL	Non-secretory protein	N_Evol	N_Evol	N_Evol		0
b13n4_050	NCU01865	NCU01865	NCU01865	hypothetical protein	99 UNCLASSIFIED PROTEINS	;F-box;	Non-secretory protein	F_Evol	F_Evol	F_Evol		0
b13n4_060	NCU01866	NCU01866	NCU01866	probable lactonohydrolase	01 METABOLISM_01.05 C-compound and carbohydrate metabolism	;SGL;NHL;Arylesterase;Str_synth;NHL;	Signal peptide	E_Evol	B_Evol	B_Evol		0
b13n4_070	NCU01867	NCU01867	NCU01867	related to endoglucanase IV	01 METABOLISM_01.05 C-compound and carbohydrate metabolism_01.05.03 polysaccharide metabolism	;Glyco_hydro_61;CBM_1;	Signal peptide	B_Evol	B_Evol	B_Evol		0
b13n4_080	NCU01868	NCU01868	NCU01868	probable maltose permease	20 CELLULAR TRANSPORT, TRANSPORT FACILITIES AND TRANSPORT ROUTES_20.01 transported compounds (substrates)_20.01.03 C-compound and carbohydrate transport_20.09 transport routes_20.09.18 cellular import_20.09.18.07 non-vesicular cellular import_70 SUBCELLULAR LOCALIZATION_70.02 eukaryotic plasma membrane / membrane attached	;MFS_1;Sugar_tr;DUF1109;Cytochrom_B561;	Non-secretory protein	E_Evol	B_Evol	B_Evol		0
b13n4_090	NCU01869	NCU01869	NCU01869	hypothetical protein	99 UNCLASSIFIED PROTEINS	NULL	Non-secretory protein	N_Evol	N_Evol	N_Evol		0
b13n4_100	NCU01870	NCU01870	NCU01870	probable enolase	01 METABOLISM_01.05 C-compound and carbohydrate metabolism_02 ENERGY_02.01 glycolysis and gluconeogenesis	;Enolase_N;Enolase_C;Phage_P2_GpU;	Non-secretory protein	E_Evol	E_Evol	E_Evol		0
b13n4_110	NCU01871	NCU01871	NCU01871	putative protein	99 UNCLASSIFIED PROTEINS	;HLH;	Non-secretory protein	O_Evol	O_Evol	F_Evol		0
b13n4_120	NCU01872	NCU01872	NCU01872	hypothetical protein	99 UNCLASSIFIED PROTEINS	NULL	Non-secretory protein	N_Evol	N_Evol	N_Evol		0
b13n4_130	NCU01873	NCU01873	NCU01873	related to cellobiose dehydrogenase	01 METABOLISM_01.05 C-compound and carbohydrate metabolism_01.05.03 polysaccharide metabolism	NULL	Signal peptide	F_Evol	F_Evol	F_Evol		0
b13n4_150	NCU01874	NCU01874	NCU01874	hypothetical protein	99 UNCLASSIFIED PROTEINS	;Extensin_2;	Non-secretory protein	N_Evol	N_Evol	N_Evol		0
b13n4_170	NCU01876	NCU01876	NCU01876	hypothetical protein	99 UNCLASSIFIED PROTEINS	NULL	Non-secretory protein	N_Evol	N_Evol	N_Evol		0
b13n4_180	NCU01877	NCU01877	NCU01877	hypothetical protein	99 UNCLASSIFIED PROTEINS	NULL	Non-secretory protein	N_Evol	N_Evol	N_Evol		0
b13n4_190	NCU01878	NCU01878	NCU01878	related to vesicular transport protein	20 CELLULAR TRANSPORT, TRANSPORT FACILITIES AND TRANSPORT ROUTES_20.09 transport routes_20.09.07 vesicular transport (Golgi network, etc.)	;DASH_Spc34;Myosin_tail_1;KID;Prefoldin_2;M;Strep_SA_rep;Pox_A_type_inc;Tektin;Osmo_CC;CDC37_N;M;KID;Pox_A_type_inc;KID;M;Strep_SA_rep;Pox_A_type_inc;Osmo_CC;Fez1;KID;IncA;MAP7;DUF1192;Rab5-bind;M;Sec2p;Pox_A_type_inc;Strep_SA_rep;FlaC_arch;EzrA;TraC;Seryl_tRNA_N;KID;Filament;Microtub_assoc;ABC1;M;Pox_A_type_inc;KID;DUF1128;M;Strep_SA_rep;M;TSC22;M;Pox_A_type_inc;Vicilin_N;Osmo_CC;DUF1014;Pox_A_t…	Non-secretory protein	F_Evol	F_Evol	F_Evol		0
b13n4_200	NCU01879	NCU01879	NCU01879	conserved hypothetical protein	99 UNCLASSIFIED PROTEINS	;TM_helix;	Signal anchor	O_Evol	F_Evol	F_Evol		0
b13n4_210	NCU01880	NCU01880	NCU01880	hypothetical protein	99 UNCLASSIFIED PROTEINS	NULL	Non-secretory protein	N_Evol	N_Evol	N_Evol		0
b13n4_220	NCU01881	NCU01881	NCU01881	hypothetical protein	99 UNCLASSIFIED PROTEINS	NULL	Non-secretory protein	N_Evol	N_Evol	N_Evol		0
b13n4_240	NCU01883	NCU01883	NCU01883	related to RVS167 protein (reduced viability upon starvation)	10 CELL CYCLE AND DNA PROCESSING_32 CELL RESCUE, DEFENSE AND VIRULENCE_32.01 stress response_32.01.11 nutrient starvation response	;BAR;SH3_1;SH3_2;	Non-secretory protein	B_Evol	F_Evol	F_Evol		0
b13n4_250	NCU01884	NCU01884	NCU01884	hypothetical protein	99 UNCLASSIFIED PROTEINS	NULL	Non-secretory protein	F_Evol	F_Evol	F_Evol		0
1nc310_020	NCU01886	NCU01886	NCU01886	putative protein	99 UNCLASSIFIED PROTEINS	;Zn_clus;NUP50;	Non-secretory protein	F_Evol	F_Evol	F_Evol		0
1nc310_030	NCU01888	NCU01888	NCU01888	hypothetical protein	99 UNCLASSIFIED PROTEINS	;dCMP_cyt_deam_1;	Non-secretory protein	F_Evol	F_Evol	F_Evol		0
1nc310_040	NCU01889	NCU01889	NCU01889	conserved hypothetical protein	99 UNCLASSIFIED PROTEINS	NULL	Signal peptide	E_Evol	B_Evol	F_Evol		0
1nc310_050	NCU01891	NCU01891	NCU01891	putative protein	99 UNCLASSIFIED PROTEINS	;MARVEL;	Signal peptide	F_Evol	F_Evol	F_Evol		0
1nc310_060	NCU01893	NCU01893	NCU01893	hypothetical protein	99 UNCLASSIFIED PROTEINS	NULL	Non-secretory protein	F_Evol	F_Evol	F_Evol		0
1nc310_070	NCU01894	NCU01894	NCU01894	putative protein	99 UNCLASSIFIED PROTEINS	NULL	Signal peptide	F_Evol	F_Evol	F_Evol		0
1nc310_080	NCU01895	NCU01895	NCU01895	related to response regulator Mcs4	30 CELLULAR COMMUNICATION/SIGNAL TRANSDUCTION MECHANISM_30.01 cellular signalling_30.01.05 enzyme mediated signal transduction	;Atrophin-1;Enterotoxin_HS;DUF959;Extensin_2;Response_reg;	Non-secretory protein	F_Evol	F_Evol	F_Evol		0
1nc310_090	NCU01896	NCU01896	NCU01896	conserved hypothetical protein	99 UNCLASSIFIED PROTEINS	;Chlam_PMP;Chlam_PMP;Chlam_PMP;Chlam_PMP;Chlam_PMP;	Non-secretory protein	F_Evol	F_Evol	F_Evol		0
1nc310_100	NCU01897	NCU01897	NCU01897	hypothetical protein	99 UNCLASSIFIED PROTEINS	NULL	Non-secretory protein	F_Evol	F_Evol	F_Evol		0
1nc310_110	NCU01898	NCU01898	NCU01898	hypothetical protein	99 UNCLASSIFIED PROTEINS	;Herpes_UL52;	Non-secretory protein	F_Evol	N_Evol	N_Evol		0
1nc310_120	NCU01899	NCU01899	NCU01899	hypothetical protein	99 UNCLASSIFIED PROTEINS	NULL	Non-secretory protein	N_Evol	N_Evol	N_Evol		0
1nc310_140	NCU01901	NCU01901	NCU01901	putative protein	99 UNCLASSIFIED PROTEINS	;Extensin_2;Lipase_3;	Non-secretory protein	F_Evol	F_Evol	F_Evol		0
1nc310_150	NCU01902	NCU01902	NCU01902	probable glucosamine-phosphate N-acetyltransferase	42 BIOGENESIS OF CELLULAR COMPONENTS_42.01 cell wall	;Acetyltransf_1;	Non-secretory protein	E_Evol	E_Evol	E_Evol		0
1nc310_160	NCU01903	NCU01903	NCU01903	probable yellowish-green 1 protein	01 METABOLISM_01.20 secondary metabolism_01.20.35 metabolism of secondary products derived from L-phenylalanine and L-tyrosine_01.20.35.01 metabolism of phenylpropanoids_01.20.35.01.01 metabolism of melanins	;DUF1100;Esterase;Peptidase_S15;Peptidase_S9;	Non-secretory protein	E_Evol	F_Evol	F_Evol		0
1nc310_170	NCU01904	NCU01904	NCU01904	related to 2-deoxy-D-gluconate 3-dehydrogenase	01 METABOLISM_01.05 C-compound and carbohydrate metabolism_01.20 secondary metabolism_01.20.01 metabolism of primary metabolic sugar derivatives_01.20.01.05 metabolism of sugar alcohols	;ADH_zinc_N;adh_short;KR;Epimerase;NmrA;	Non-secretory protein	E_Evol	E_Evol	E_Evol		0
1nc310_190	NCU01906	NCU01906	NCU01906	probable aldehyde reductase	01 METABOLISM_01.05 C-compound and carbohydrate metabolism_70 SUBCELLULAR LOCALIZATION_70.03 cytoplasm	;Aldo_ket_red;	Non-secretory protein	E_Evol	E_Evol	E_Evol		0
1nc310_200	NCU01907	NCU01907	NCU01907	probable syntaxin, vesicular transport protein	14 PROTEIN FATE (folding, modification, destination)_14.04 protein targeting, sorting and translocation_20 CELLULAR TRANSPORT, TRANSPORT FACILITIES AND TRANSPORT ROUTES_20.09 transport routes_20.09.07 vesicular transport (Golgi network, etc.)_20.09.07.03 ER to Golgi transport_70 SUBCELLULAR LOCALIZATION_70.09 intracellular transport vesicles	;DUF1957;Syntaxin;SNARE;	Non-secretory protein	E_Evol	E_Evol	E_Evol		0
1nc310_210	NCU01908	NCU01908	NCU01908	hypothetical protein	99 UNCLASSIFIED PROTEINS	;Atrophin-1;Drf_FH1;	Non-secretory protein	F_Evol	F_Evol	F_Evol		0
1nc310_230	NCU01911	NCU01911	NCU01911	related to protein transport protein	20 CELLULAR TRANSPORT, TRANSPORT FACILITIES AND TRANSPORT ROUTES_20.09 transport routes_20.09.07 vesicular transport (Golgi network, etc.)_20.09.16 cellular export and secretion	;Prefoldin_2;Sec2p;TUDOR;	Non-secretory protein	A_Evol	F_Evol	F_Evol		0
1nc310_240	NCU01912	NCU01912	NCU01912	related to dolichyl-phosphate-mannose-protein mannosyltransferase	01 METABOLISM_01.05 C-compound and carbohydrate metabolism_14 PROTEIN FATE (folding, modification, destination)_14.07 protein modification_14.07.02 modification with sugar residues (e.g. glycosylation, deglycosylation)_42 BIOGENESIS OF CELLULAR COMPONENTS_42.01 cell wall_70 SUBCELLULAR LOCALIZATION_70.07 endoplasmic reticulum	;PMT;MIR;HPC2;Laminin_I;DUF883;Apolipoprotein;CsbD;LEA_4;LEA_4;	Non-secretory protein	B_Evol	B_Evol	B_Evol		0
1nc310_250	NCU01913	NCU01913	NCU01913	related to spliceosome-associated-protein	11 TRANSCRIPTION_11.04 RNA processing_11.04.03 mRNA processing (splicing, 5'-, 3'-end processing)_11.04.03.01 splicing_70 SUBCELLULAR LOCALIZATION_70.10 nucleus	;Surp;Surp;DivIVA;SSDP;	Non-secretory protein	E_Evol	A_Evol	A_Evol		0
1nc310_260	NCU01914	NCU01914	NCU01914	probable GRD19 protein, involved in retrieval of late Golgi membrane proteins from the prevacuolar compartment	14 PROTEIN FATE (folding, modification, destination)_14.04 protein targeting, sorting and translocation_20 CELLULAR TRANSPORT, TRANSPORT FACILITIES AND TRANSPORT ROUTES_20.09 transport routes_20.09.13 vacuolar/lysosomal transport_70 SUBCELLULAR LOCALIZATION_70.03 cytoplasm	;PX;	Non-secretory protein	E_Evol	E_Evol	E_Evol		0
1nc310_270	NCU01916	NCU01916	NCU01916	probable mitochondrial carrier protein	20 CELLULAR TRANSPORT, TRANSPORT FACILITIES AND TRANSPORT ROUTES_20.09 transport routes_20.09.04 mitochondrial transport_70 SUBCELLULAR LOCALIZATION_70.16 mitochondrion	;Mito_carr;Mito_carr;Mito_carr;	Non-secretory protein	E_Evol	E_Evol	E_Evol		0
1nc310_280	NCU01917	NCU01917	NCU01917	hypothetical protein	99 UNCLASSIFIED PROTEINS	;Atrophin-1;RRM_1;	Non-secretory protein	F_Evol	F_Evol	F_Evol		0
1nc310_290	NCU01918	NCU01918	NCU01918	probable ARP2/3 complex 20 kDa subunit	42 BIOGENESIS OF CELLULAR COMPONENTS_42.04 cytoskeleton/structural proteins_42.04.03 actin cytoskeleton_70 SUBCELLULAR LOCALIZATION_70.04 cytoskeleton	;ARPC4;	Signal peptide	E_Evol	E_Evol	E_Evol		0
1nc310_300	NCU01919	NCU01919	NCU01919	related to ubiquitin-specific protease 7	14 PROTEIN FATE (folding, modification, destination)_14.13 protein/peptide degradation_14.13.01 cytoplasmic and nuclear protein degradation	;ubiquitin;UCH;Integrin_b_cyt;	Non-secretory protein	E_Evol	E_Evol	E_Evol		0
1nc310_310	NCU01920	NCU01920	NCU01920	hypothetical protein	99 UNCLASSIFIED PROTEINS	NULL	Non-secretory protein	F_Evol	N_Evol	N_Evol		0
1nc310_350	NCU01922	NCU01922	NCU01922	conserved hypothetical protein	99 UNCLASSIFIED PROTEINS	;Ubie_methyltran;Methyltransf_11;Methyltransf_12;	Non-secretory protein	B_Evol	F_Evol	F_Evol		0
1nc315_010	NCU01926	NCU01926	NCU01926	hypothetical protein	99 UNCLASSIFIED PROTEINS	NULL	Non-secretory protein	F_Evol	F_Evol	N_Evol		0
1nc315_020	NCU01927	NCU01927	NCU01927	hypothetical protein	99 UNCLASSIFIED PROTEINS	;VHS;GAT;	Non-secretory protein	F_Evol	F_Evol	F_Evol		0
1nc315_030	NCU01928	NCU01928	NCU01928	conserved hypothetical protein	99 UNCLASSIFIED PROTEINS	;UBA;UBX;	Non-secretory protein	E_Evol	F_Evol	F_Evol		0
1nc315_040	NCU01929	NCU01929	NCU01929	related to poly(A)-specific ribonuclease	11 TRANSCRIPTION_11.04 RNA processing_11.04.03 mRNA processing (splicing, 5'-, 3'-end processing)_11.04.03.03 5'-end processing	NULL	Non-secretory protein	E_Evol	E_Evol	F_Evol		0
1nc315_060	NCU01931	NCU01931	NCU01931	hypothetical protein	99 UNCLASSIFIED PROTEINS	;Apidaecin;Zn_clus;	Non-secretory protein	F_Evol	F_Evol	N_Evol		0
1nc315_080	NCU01932	NCU01932	NCU01932	conserved hypothetical protein	99 UNCLASSIFIED PROTEINS	;AT_hook;SET;MotA_activ;	Non-secretory protein	F_Evol	F_Evol	F_Evol		0
1nc315_100	NCU01935	NCU01935	NCU01935	hypothetical protein	99 UNCLASSIFIED PROTEINS	NULL	Non-secretory protein	N_Evol	N_Evol	N_Evol		0
1nc315_110	NCU01936	NCU01936	NCU01936	related to DNA polymerase eta	10 CELL CYCLE AND DNA PROCESSING_10.01 DNA processing_10.01.05 DNA recombination and DNA repair_10.01.05.01 DNA repair	;IMS;zf-C2H2;	Non-secretory protein	E_Evol	B_Evol	B_Evol		0
1nc315_120	NCU01937	NCU01937	NCU01937	hypothetical protein	99 UNCLASSIFIED PROTEINS	NULL	Non-secretory protein	N_Evol	N_Evol	N_Evol		0
1nc315_130	NCU01938	NCU01938	NCU01938	putative protein	99 UNCLASSIFIED PROTEINS	;Cytadhesin_P30;Extensin_2;	Non-secretory protein	F_Evol	F_Evol	F_Evol		0
1nc315_140	NCU01939	NCU01939	NCU01939	related to importin beta homolog Kap119p	20 CELLULAR TRANSPORT, TRANSPORT FACILITIES AND TRANSPORT ROUTES_20.09 transport routes_20.09.01 nuclear transport_70 SUBCELLULAR LOCALIZATION_70.03 cytoplasm_70.10 nucleus	;IBN_N;Xpo1;OPA3;Cse1;HEAT;GGDEF;	Non-secretory protein	E_Evol	E_Evol	A_Evol		0
1nc320_010	NCU01940	NCU01940	NCU01940	related to serine/threonine-specific protein kinase	14 PROTEIN FATE (folding, modification, destination)_14.07 protein modification_14.07.03 modification by phosphorylation, dephosphorylation, autophosphorylation_30 CELLULAR COMMUNICATION/SIGNAL TRANSDUCTION MECHANISM_30.01 cellular signalling_32 CELL RESCUE, DEFENSE AND VIRULENCE_32.01 stress response_32.01.03 osmotic and salt stress response	;DUF1878;Pkinase;Pkinase_Tyr;RIO1;	Non-secretory protein	B_Evol	F_Evol	F_Evol		0
1nc320_030	NCU01942	NCU01942	NCU01942	hypothetical protein	99 UNCLASSIFIED PROTEINS	NULL	Signal peptide	N_Evol	N_Evol	N_Evol		0
1nc320_040	NCU01944	NCU01944	NCU01944	hypothetical protein	99 UNCLASSIFIED PROTEINS	;MAP7;	Non-secretory protein	F_Evol	F_Evol	F_Evol		0
1nc320_080	NCU01948	NCU01948	NCU01948	probable ribosomal protein L21.e.A, cytosolic	12 PROTEIN SYNTHESIS_12.01 ribosome biogenesis_12.01.01 ribosomal proteins_70 SUBCELLULAR LOCALIZATION_70.03 cytoplasm	;Ribosomal_L21e;	Non-secretory protein	E_Evol	E_Evol	E_Evol		0
1nc320_090	NCU01949	NCU01949	NCU01949	probable 40S ribosomal protein S9 (S7)	12 PROTEIN SYNTHESIS_12.01 ribosome biogenesis_12.01.01 ribosomal proteins_12.07 translational control_70 SUBCELLULAR LOCALIZATION_70.03 cytoplasm	;Ribosomal_S4;S4;	Non-secretory protein	E_Evol	E_Evol	E_Evol		0
1nc320_100	NCU01950	NCU01950	NCU01950	related to step II splicing factor SLU7	11 TRANSCRIPTION_11.04 RNA processing_11.04.03 mRNA processing (splicing, 5'-, 3'-end processing)_11.04.03.01 splicing	;zf-CCHC;	Non-secretory protein	E_Evol	E_Evol	E_Evol		0
1nc320_110	NCU01951	NCU01951	NCU01951	catalytic subunit of DNA polymerase zeta UPR-1	10 CELL CYCLE AND DNA PROCESSING_10.01 DNA processing_10.01.03 DNA synthesis and replication_10.01.05 DNA recombination and DNA repair_10.01.05.01 DNA repair	;DNA_pol_B_exo;Vicilin_N;PPAK;DNA_pol_B;	Non-secretory protein	E_Evol	E_Evol	B_Evol		0
1nc320_130	NCU01954	NCU01954	NCU01954	related to pre-mrna-splicing factor cwc24	11 TRANSCRIPTION_11.04 RNA processing_11.04.03 mRNA processing (splicing, 5'-, 3'-end processing)_11.04.03.01 splicing_16 PROTEIN WITH BINDING FUNCTION OR COFACTOR REQUIREMENT (structural or catalytic)_16.01 protein binding	;zf-CCCH;FYVE;zf-C3HC4;	Non-secretory protein	E_Evol	E_Evol	B_Evol		0
1nc320_140	NCU01955	NCU01955	NCU01955	related to autophagocytosis protein	14 PROTEIN FATE (folding, modification, destination)_14.13 protein/peptide degradation_14.13.04 lysosomal and vacuolar protein degradation_14.13.04.02 vacuolar protein degradation_20 CELLULAR TRANSPORT, TRANSPORT FACILITIES AND TRANSPORT ROUTES_20.09 transport routes_20.09.13 vacuolar/lysosomal transport	;Autophagy_N;Autophagy_C;	Non-secretory protein	E_Evol	E_Evol	E_Evol		0
1nc320_170	NCU01958	NCU01958	NCU01958	mating type protein A-1	34 INTERACTION WITH THE ENVIRONMENT_34.11 cellular sensing and response to external stimulus_34.11.03 chemoperception and response_34.11.03.07 pheromone response, mating-type determination, sex-specific proteins	;MAT_Alpha1;	Non-secretory protein	F_Evol	F_Evol	F_Evol		0
1nc322_010	NCU01959	NCU01959	NCU01959	mating type protein A-2	34 INTERACTION WITH THE ENVIRONMENT_34.11 cellular sensing and response to external stimulus_34.11.03.07 pheromone response, mating-type determination, sex-specific proteins	NULL	Non-secretory protein	F_Evol	F_Evol	F_Evol		0
1nc322_020	NCU01960	NCU01960	NCU01960	mating type protein A-3	34 INTERACTION WITH THE ENVIRONMENT_34.11 cellular sensing and response to external stimulus_34.11.03.07 pheromone response, mating-type determination, sex-specific proteins	;HMG_box;	Non-secretory protein	N_Evol	N_Evol	N_Evol		0
1nc322_030	NCU01961	NCU01961	NCU01961	hypothetical protein	99 UNCLASSIFIED PROTEINS	;Exo_endo_phos;zf-GRF;	Non-secretory protein	E_Evol	B_Evol	F_Evol		0
b13d15_340	NCU01962	NCU01962	NCU01962	related to cytochrome-c oxidase chain VIa precursor	02 ENERGY_02.13 respiration_02.13.03 aerobic respiration	;COX6A;	Non-secretory protein	E_Evol	E_Evol	B_Evol		0
b13d15_330	NCU01963	NCU01963	NCU01963	related to anaphase-promoting complex subunit 5	10 CELL CYCLE AND DNA PROCESSING_10.03 cell cycle_10.03.01 mitotic cell cycle and cell cycle control	;TPR_4;TPR_4;TPR_4;	Non-secretory protein	F_Evol	F_Evol	F_Evol		0
b13d15_320	NULL	NCU01964	NCU01964	putative protein	99 UNCLASSIFIED PROTEINS	NULL	Signal peptide	F_Evol	F_Evol	F_Evol		0
b13d15_290	NCU01967	NCU01967	NCU01967	putative protein	99 UNCLASSIFIED PROTEINS	NULL	Non-secretory protein	F_Evol	F_Evol	F_Evol		0
b13d15_280	NCU01968	NCU01968	NCU01968	related to HOL1 protein	20 CELLULAR TRANSPORT, TRANSPORT FACILITIES AND TRANSPORT ROUTES_20.01 transported compounds (substrates)_20.01.27 drug/toxin transport_20.03 transport facilities	;HlyIII;CitMHS;MFS_1;Sugar_tr;PHO4;DctM;ATP-synt_C;	Signal peptide	F_Evol	F_Evol	F_Evol		0
b13d15_270	NCU01969	NCU01969	NCU01969	hypothetical protein	99 UNCLASSIFIED PROTEINS	;Thioredoxin;	Signal peptide	F_Evol	F_Evol	F_Evol		0
b13d15_260	NCU01970	NCU01970	NCU01970	conserved hypothetical protein	99 UNCLASSIFIED PROTEINS	;DUF718;	Non-secretory protein	E_Evol	E_Evol	F_Evol		0
b13d15_240	NCU01972	NCU01972	NCU01972	hypothetical protein	99 UNCLASSIFIED PROTEINS	NULL	Non-secretory protein	N_Evol	N_Evol	N_Evol		0
b13d15_230	NCU01973	NCU01973	NCU01973	hypothetical protein	99 UNCLASSIFIED PROTEINS	;JmjC;Atrophin-1;SET;	Non-secretory protein	F_Evol	F_Evol	F_Evol		0
b13d15_220	NCU01974	NCU01974	NCU01974	conserved hypothetical protein	99 UNCLASSIFIED PROTEINS	;DUF1777;	Non-secretory protein	B_Evol	F_Evol	F_Evol		0
b13d15_200	NCU01976	NCU01976	NCU01976	hypothetical protein	99 UNCLASSIFIED PROTEINS	;RRM_1;RRM_1;Drf_FH1;	Non-secretory protein	F_Evol	N_Evol	N_Evol		0
b13d15_180	NCU01978	NCU01978	NCU01978	conserved hypothetical protein	99 UNCLASSIFIED PROTEINS	;TRP;PetM;	Signal peptide	F_Evol	F_Evol	F_Evol		0
b13d15_170	NCU01979	NCU01979	NCU01979	probable hydroxyquinol-1,2-dioxygenase	01 METABOLISM_01.20 secondary metabolism	;Dioxygenase_N;Dioxygenase_C;	Non-secretory protein	E_Evol	E_Evol	E_Evol		0
b13d15_160	NCU01980	NCU01980	NCU01980	conserved hypothetical protein	99 UNCLASSIFIED PROTEINS	;DUF1613;	Non-secretory protein	B_Evol	A_Evol	F_Evol		0
b13d15_150	NCU01981	NCU01981	NCU01981	probable translation initiation factor SUI1	12 PROTEIN SYNTHESIS_12.04 translation_12.04.01 translation initiation	;SUI1;	Non-secretory protein	E_Evol	E_Evol	E_Evol		0
b13d15_140	NCU01982	NCU01982	NCU01982	hypothetical protein	99 UNCLASSIFIED PROTEINS	NULL	Non-secretory protein	F_Evol	N_Evol	N_Evol		0
b13d15_130	NCU01983	NCU01983	NCU01983	hypothetical protein	99 UNCLASSIFIED PROTEINS	;MBA1;Tim44;	Non-secretory protein	F_Evol	N_Evol	N_Evol		0
b13d15_120	NCU01984	NCU01984	NCU01984	hypothetical protein	99 UNCLASSIFIED PROTEINS	;Extensin_2;	Non-secretory protein	F_Evol	F_Evol	F_Evol		0
b13d15_110	NCU01985	NCU01985	NCU01985	probable sulfate adenylyltransferase	01 METABOLISM_01.01 amino acid metabolism_01.02 nitrogen, sulfur and selenium metabolism	;ATP-sulfurylase;APS_kinase;	Non-secretory protein	E_Evol	E_Evol	E_Evol		0
b13d15_100	NCU01988	NCU01988	NCU01988	related to glucan 1,4-alpha-glucosidase	01 METABOLISM_01.05 C-compound and carbohydrate metabolism	NULL	Non-secretory protein	N_Evol	N_Evol	N_Evol		0
b13d15_090	NCU01989	NCU01989	NCU01989	conserved hypothetical protein	99 UNCLASSIFIED PROTEINS	;DUF540;	Non-secretory protein	B_Evol	B_Evol	F_Evol		0
b13d15_080	NCU01990	NCU01990	NCU01990	conserved hypothetical protein	99 UNCLASSIFIED PROTEINS	;MFS_1;UPF0016;LysE;DUF1212;UPF0016;	Signal peptide	B_Evol	F_Evol	F_Evol		0
b13d15_070	NCU01991	NCU01991	NCU01991	hypothetical protein	99 UNCLASSIFIED PROTEINS	;RRM_3;	Non-secretory protein	F_Evol	F_Evol	N_Evol		0
b13d15_060	NCU01992	NCU01992	NCU01992	related to coatomer gamma-2 subunit	20 CELLULAR TRANSPORT, TRANSPORT FACILITIES AND TRANSPORT ROUTES_20.09 transport routes_20.09.07 vesicular transport (Golgi network, etc.)	;Adaptin_N;HEAT_PBS;HEAT_PBS;HEAT_PBS;HEAT_PBS;Gamma-COP;	Non-secretory protein	E_Evol	E_Evol	E_Evol		0
b13d15_050	NCU01993	NCU01993	NCU01993	related to ethanolaminephosphotransferase	01 METABOLISM_01.06 lipid, fatty acid and isoprenoid metabolism	;Feld-I_B;CDP-OH_P_transf;KdpA;	Non-secretory protein	E_Evol	E_Evol	E_Evol		0
b13d15_040	NCU01994	NCU01994	NCU01994	hypothetical protein	99 UNCLASSIFIED PROTEINS	;PAP1;MAP7;bZIP_1;bZIP_2;	Non-secretory protein	F_Evol	F_Evol	F_Evol		0
b13d15_030	NCU01995	NCU01995	NCU01995	hypothetical protein	99 UNCLASSIFIED PROTEINS	NULL	Non-secretory protein	F_Evol	F_Evol	N_Evol		0
b13d15_020	NCU01996	NCU01996	NCU01996	related to palI protein	34 INTERACTION WITH THE ENVIRONMENT	;MARVEL;TrbL;PalI;Cytadhesin_P30;Extensin_2;	Signal peptide	F_Evol	F_Evol	F_Evol		0
b13d15_010	NCU01997	NCU01997	NCU01997	conserved hypothetical protein	99 UNCLASSIFIED PROTEINS	;ABC1;APH;	Non-secretory protein	E_Evol	B_Evol	B_Evol		0
b15b3_010	NCU01998	NCU01998	NCU01998	probable septin aspE	10 CELL CYCLE AND DNA PROCESSING_10.03 cell cycle_10.03.03 cytokinesis (cell division) /septum formation and hydrolysis_20 CELLULAR TRANSPORT, TRANSPORT FACILITIES AND TRANSPORT ROUTES_20.09 transport routes_20.09.14 cytoskeleton-dependent transport_20.09.14.02 actin dependent transport	;MMR_HSR1;Septin;	Non-secretory protein	B_Evol	F_Evol	F_Evol		0
b15b3_020	NCU01999	NCU01999	NCU01999	hypothetical protein	99 UNCLASSIFIED PROTEINS	NULL	Non-secretory protein	F_Evol	F_Evol	N_Evol		0
b15b3_030	NCU02000	NCU02000	NCU02000	conserved hypothetical protein	99 UNCLASSIFIED PROTEINS	;SF3b10;	Non-secretory protein	E_Evol	E_Evol	E_Evol		0
b15b3_040	NCU02001	NCU02001	NCU02001	conserved hypothetical protein	99 UNCLASSIFIED PROTEINS	;MAGE;	Non-secretory protein	B_Evol	B_Evol	F_Evol		0
b15b3_050	NCU02002	NCU02002	NCU02002	hypothetical protein	99 UNCLASSIFIED PROTEINS	;Ku_PK_bind;	Non-secretory protein	F_Evol	F_Evol	N_Evol		0
b15b3_060	NCU02003	NCU02003	NCU02003	translation elongation factor eEF-1 alpha chain TEF-1	12 PROTEIN SYNTHESIS_12.04 translation	;GTP_EFTU;MMR_HSR1;GTP_EFTU_D2;GTP_EFTU_D3;	Non-secretory protein	E_Evol	E_Evol	E_Evol		0
b15b3_080	NCU02004	NCU02004	NCU02004	related to phosphoserine phosphatase	01 METABOLISM_01.01 amino acid metabolism_01.02 nitrogen, sulfur and selenium metabolism_01.02.03 sulfur metabolism_01.02.03.01 sulfate assimilation	;Hydrolase;Put_Phosphatase;Hydrolase_3;	Non-secretory protein	O_Evol	F_Evol	F_Evol		0
b15b3_090	NCU02005	NCU02005	NCU02005	probable phosphoadenosine phosphosulfate reductase	01 METABOLISM_01.01 amino acid metabolism_01.02 nitrogen, sulfur and selenium metabolism	;PAPS_reduct;	Non-secretory protein	E_Evol	E_Evol	B_Evol		0
b15b3_100	NCU02006	NCU02006	NCU02006	related to apopolysialoglycoprotein	98 CLASSIFICATION NOT YET CLEAR-CUT	;Bim_N;	Non-secretory protein	F_Evol	F_Evol	F_Evol		0
b15b3_110	NCU02007	NCU02007	NCU02007	conserved hypothetical protein	99 UNCLASSIFIED PROTEINS	;Complex1_LYR;	Non-secretory protein	E_Evol	E_Evol	E_Evol		0
b15b3_115	NCU02008	NCU02008	NCU02008	hypothetical protein	99 UNCLASSIFIED PROTEINS	NULL	Non-secretory protein	N_Evol	N_Evol	N_Evol		0
b15b3_120	NCU02009	NCU02009	NCU02009	related to ferric reductase	34 INTERACTION WITH THE ENVIRONMENT_34.01 homeostasis_34.01.01 homeostasis of cations_34.01.01.01 homeostasis of metal ions (Na, K, Ca etc.)_70 SUBCELLULAR LOCALIZATION_70.02 eukaryotic plasma membrane / membrane attached	;aPHC;Ferric_reduct;FAD_binding_8;NAD_binding_6;NAD_binding_1;	Non-secretory protein	B_Evol	F_Evol	F_Evol		0
b15b3_130	NCU02010	NCU02010	NCU02010	probable 2-isopropylmalalate synthase	01 METABOLISM_01.01 amino acid metabolism_01.01.11 metabolism of the pyruvate family (alanine, isoleucine, leucine, valine) and D-alanine_70 SUBCELLULAR LOCALIZATION_70.03 cytoplasm_70.16 mitochondrion	;HMGL-like;LeuA_dimer;	Non-secretory protein	E_Evol	E_Evol	E_Evol		0
b15b3_140	NCU02011	NCU02011	NCU02011	probable KAP95 protein	14 PROTEIN FATE (folding, modification, destination)_14.04 protein targeting, sorting and translocation_20 CELLULAR TRANSPORT, TRANSPORT FACILITIES AND TRANSPORT ROUTES_20.09 transport routes_20.09.01 nuclear transport_70 SUBCELLULAR LOCALIZATION_70.03 cytoplasm	;IBN_N;HEAT;Adaptin_N;HEAT;HEAT;HEAT;HEAT;HEAT;Arm;HEAT;Arm;HEAT;HEAT;RmuC;HEAT;HEAT;	Non-secretory protein	E_Evol	E_Evol	E_Evol		0
b15b3_150	NCU02012	NCU02012	NCU02012	related to general repressor of transcription	11 TRANSCRIPTION_11.02 RNA synthesis_11.02.03 mRNA synthesis	;Zn_clus;Fungal_trans;	Non-secretory protein	F_Evol	F_Evol	F_Evol		0
b15b3_160	NCU02013	NCU02013	NCU02013	related to ochre suppressor tyr-tRNA	98 CLASSIFICATION NOT YET CLEAR-CUT	;DUF1690;	Non-secretory protein	E_Evol	B_Evol	F_Evol		0
b15b3_170	NCU02014	NCU02014	NCU02014	conserved hypothetical protein	99 UNCLASSIFIED PROTEINS	;TYW3;DUF1777;	Non-secretory protein	F_Evol	F_Evol	F_Evol		0
b15b3_180	NCU02015	NCU02015	NCU02015	conserved hypothetical protein	99 UNCLASSIFIED PROTEINS	NULL	Non-secretory protein	F_Evol	F_Evol	F_Evol		0
b15b3_190	NCU02016	NCU02016	NCU02016	conserved hypothetical protein	99 UNCLASSIFIED PROTEINS	NULL	Signal anchor	A_Evol	F_Evol	F_Evol		0
b15b3_210	NCU02018	NCU02018	NCU02018	conserved hypothetical protein	99 UNCLASSIFIED PROTEINS	;adh_short;KR;Epimerase;NAD_binding_4;	Non-secretory protein	E_Evol	E_Evol	B_Evol		0
b15b3_220	NCU02019	NCU02019	NCU02019	conserved hypothetical protein	99 UNCLASSIFIED PROTEINS	;DAO;Pyr_redox;	Non-secretory protein	E_Evol	B_Evol	B_Evol		0
b15b3_230	NCU02020	NCU02020	NCU02020	conserved hypothetical protein	99 UNCLASSIFIED PROTEINS	;NnrU;Ferric_reduct;FAD_binding_8;NAD_binding_6;NAD_binding_1;Extensin_2;	Non-secretory protein	F_Evol	F_Evol	F_Evol		0
b2j23_010	NCU02021	NCU02021	NCU02021	hypothetical protein	99 UNCLASSIFIED PROTEINS	;Toxin_18;	Signal peptide	F_Evol	N_Evol	N_Evol	4nc137_190	0
b2j23_020	NCU02022	NCU02022	NCU02022	hypothetical protein	99 UNCLASSIFIED PROTEINS	NULL	Non-secretory protein	F_Evol	F_Evol	F_Evol		0
b2j23_030	NCU02023	NCU02023	NCU02023	conserved hypothetical protein	99 UNCLASSIFIED PROTEINS	;TRI12;Sugar_tr;MFS_1;ABC-3;DUF368;C4dic_mal_tran;ABC2_membrane;PMT;	Non-secretory protein	B_Evol	F_Evol	F_Evol		0
b2j23_050	NCU02025	NCU02025	NCU02025	putative protein	99 UNCLASSIFIED PROTEINS	NULL	Non-secretory protein	F_Evol	F_Evol	F_Evol		0
b2j23_060	NCU02026	NCU02026	NCU02026	conserved hypothetical protein	99 UNCLASSIFIED PROTEINS	NULL	Non-secretory protein	F_Evol	F_Evol	F_Evol		0
b2j23_070	NCU02027	NCU02027	NCU02027	related to lysophospholipase	01 METABOLISM_01.06 lipid, fatty acid and isoprenoid metabolism	;Peptidase_S9;Abhydrolase_2;Abhydrolase_3;	Non-secretory protein	E_Evol	E_Evol	E_Evol		0
b2j23_080	NCU02028	NCU02028	NCU02028	conserved hypothetical protein	99 UNCLASSIFIED PROTEINS	;LigB;	Non-secretory protein	E_Evol	E_Evol	O_Evol		0
b2j23_090	NCU02029	NCU02029	NCU02029	putative protein	99 UNCLASSIFIED PROTEINS	NULL	Non-secretory protein	N_Evol	N_Evol	N_Evol		0
b2j23_100	NCU02030	NCU02030	NCU02030	putative protein	99 UNCLASSIFIED PROTEINS	;Pepsin-I3;	Non-secretory protein	N_Evol	N_Evol	N_Evol		0
b2j23_160	NCU02035	NCU02035	NCU02035	conserved hypothetical protein	99 UNCLASSIFIED PROTEINS	;HhH-GPD;	Non-secretory protein	F_Evol	F_Evol	F_Evol		0
b2j23_180	NCU02037	NCU02037	NCU02037	hypothetical protein	99 UNCLASSIFIED PROTEINS	;zf-C3HC4;	Non-secretory protein	N_Evol	N_Evol	N_Evol	4nc275_060	0
b2i10_130	NCU02041	NCU02041	NCU02041	putative protein	99 UNCLASSIFIED PROTEINS	;Penaeidin;	Signal peptide	F_Evol	F_Evol	F_Evol		0
b2i10_110	NCU02042	NCU02042	NCU02042	related to cholesterol dehydrogenase	01 METABOLISM_01.06 lipid, fatty acid and isoprenoid metabolism	;adh_short;RmlD_sub_bind;Epimerase;KR;3Beta_HSD;NAD_binding_4;	Non-secretory protein	B_Evol	B_Evol	F_Evol		0
b2i10_100	NCU02043	NCU02043	NCU02043	conserved hypothetical protein	99 UNCLASSIFIED PROTEINS	;DUF862;	Non-secretory protein	O_Evol	F_Evol	F_Evol		0
b2i10_090	NCU02044	NCU02044	NCU02044	probable GTP-binding protein	16 PROTEIN WITH BINDING FUNCTION OR COFACTOR REQUIREMENT (structural or catalytic)_16.19 nucleotide/nucleoside/nucleobase binding_16.19.05 GTP binding_30 CELLULAR COMMUNICATION/SIGNAL TRANSDUCTION MECHANISM_30.01 cellular signalling	;MMR_HSR1;DUF1895;DUF933;	Non-secretory protein	E_Evol	E_Evol	E_Evol		0
b2i10_080	NCU02046	NCU02046	NCU02046	related to sialidase	01 METABOLISM_01.05 C-compound and carbohydrate metabolism_01.05.02 sugar, glucoside, polyol and carboxylate metabolism_01.05.02.07 sugar, glucoside, polyol and carboxylate catabolism	NULL	Non-secretory protein	F_Evol	F_Evol	F_Evol		0
b2i10_060	NCU02048	NCU02048	NCU02048	conserved hypothetical protein	99 UNCLASSIFIED PROTEINS	;VPS9;Ank;Ank;Ank;Ank;Ank;PX;	Non-secretory protein	F_Evol	F_Evol	F_Evol		0
b2i10_050	NCU02049	NCU02049	NCU02049	related to intracellular protein transport protein	20 CELLULAR TRANSPORT, TRANSPORT FACILITIES AND TRANSPORT ROUTES_20.09 transport routes_20.09.07 vesicular transport (Golgi network, etc.)	;Extensin_2;Myosin_tail_1;SF-assemblin;TPR_MLP1_2;Prefoldin_2;Filament;EzrA;Phage_GP20;DUF827;Rho_Binding;Rab5-bind;Ins_allergen_rp;Reo_sigmaC;DUF869;Tup_N;PspA_IM30;	Non-secretory protein	F_Evol	F_Evol	F_Evol		0
b2i10_040	NCU02051	NCU02051	NCU02051	related to multidrug resistance protein	20 CELLULAR TRANSPORT, TRANSPORT FACILITIES AND TRANSPORT ROUTES_20.03 transport facilities_20.03.25 ABC transporters_32 CELL RESCUE, DEFENSE AND VIRULENCE_32.01 stress response_32.05 disease, virulence and defense_32.05.01 resistance proteins	;MFS_1;SMC_N;ABC_tran;Dynamin_N;ABC_membrane;Trp_Tyr_perm;ABC_tran;PRK;	Non-secretory protein	F_Evol	F_Evol	F_Evol		0
b2i10_020	NCU02052	NCU02052	NCU02052	related to TSM1 - component of TFIID complex	11 TRANSCRIPTION_11.02 RNA synthesis_11.02.03 mRNA synthesis_11.02.03.01 general transcription activities_11.02.03.04 transcriptional control_70 SUBCELLULAR LOCALIZATION_70.10 nucleus	;FlaG;Extensin_2;DUF1777;	Non-secretory protein	F_Evol	F_Evol	F_Evol		0
1nc338_010	NCU02053	NCU02053	NCU02053	DNA repair protein MUS-42 MUS-42	10 CELL CYCLE AND DNA PROCESSING_10.01 DNA processing_10.01.05 DNA recombination and DNA repair_10.01.05.01 DNA repair	;BRCT;HCV_NS5a_1b;IMS;AT_hook;	Non-secretory protein	E_Evol	F_Evol	F_Evol		0
1nc338_020	NCU02054	NCU02054	NCU02054	hypothetical protein	99 UNCLASSIFIED PROTEINS	;DUF1777;RED_N;	Non-secretory protein	F_Evol	F_Evol	F_Evol		0
1nc338_030	NCU02055	NCU02055	NCU02055	related to uridine ribohydrolase	01 METABOLISM_01.03 nucleotide/nucleoside/nucleobase metabolism_01.03.01 purin nucleotide/nucleoside/nucleobase metabolism	;IU_nuc_hydro;DUF296;	Non-secretory protein	E_Evol	E_Evol	F_Evol		0
1nc338_040	NCU02056	NCU02056	NCU02056	related to aldehyde dehydrogenase	01 METABOLISM_01.20 secondary metabolism_02 ENERGY_02.16 fermentation	;Aldedh;LuxC;	Non-secretory protein	E_Evol	E_Evol	E_Evol		0
1nc338_050	NCU02057	NCU02057	NCU02057	related to histidine kinase	14 PROTEIN FATE (folding, modification, destination)_14.07 protein modification_14.07.03 modification by phosphorylation, dephosphorylation, autophosphorylation_30 CELLULAR COMMUNICATION/SIGNAL TRANSDUCTION MECHANISM_30.05 transmembrane signal transduction_30.05.01 receptor enzyme mediated signalling_30.05.01.10 two-component signal transduction system (sensor kinase component)	;PAS;PAS_4;PAS_3;HisKA;HATPase_c;Response_reg;	Non-secretory protein	B_Evol	F_Evol	F_Evol		0
1nc338_060	NCU02058	NCU02058	NCU02058	hypothetical protein	99 UNCLASSIFIED PROTEINS	;TolA;	Non-secretory protein	N_Evol	N_Evol	N_Evol		0
1nc338_070	NCU02059	NCU02059	NCU02059	related to aspartic proteinase	14 PROTEIN FATE (folding, modification, destination)_14.13 protein/peptide degradation_42 BIOGENESIS OF CELLULAR COMPONENTS_42.27 extracellular / secretion proteins	;Asp;	Signal peptide	B_Evol	F_Evol	F_Evol		0
1nc338_080	NCU02060	NCU02060	NCU02060	conserved hypothetical protein	99 UNCLASSIFIED PROTEINS	;WLM;zf-RanBP;	Non-secretory protein	B_Evol	F_Evol	F_Evol		0
1nc338_090	NCU02061	NCU02061	NCU02061	hypothetical protein	99 UNCLASSIFIED PROTEINS	;WSC;	Signal anchor	F_Evol	F_Evol	N_Evol		0
1nc338_100	NCU02062	NCU02062	NCU02062	hypothetical protein	99 UNCLASSIFIED PROTEINS	NULL	Non-secretory protein	N_Evol	N_Evol	N_Evol		0
1nc340_010	NCU02065	NCU02065	NCU02065	conserved hypothetical protein	99 UNCLASSIFIED PROTEINS	;MtrC;DUF726;Rick_17kDa_Anti;Phage_tail_T;z-alpha;	Non-secretory protein	F_Evol	F_Evol	F_Evol		0
1nc340_020	NCU02066	NCU02066	NCU02066	related to excision repair protein RAD4	10 CELL CYCLE AND DNA PROCESSING_10.01 DNA processing_10.01.05 DNA recombination and DNA repair_10.01.05.01 DNA repair_70 SUBCELLULAR LOCALIZATION_70.10 nucleus	;Noc2;Nha1_C;	Non-secretory protein	E_Evol	E_Evol	B_Evol		0
1nc340_040	NCU02067	NCU02067	NCU02067	related to mitochondrial inheritance component mdm12	42 BIOGENESIS OF CELLULAR COMPONENTS_42.16 mitochondrion_70 SUBCELLULAR LOCALIZATION_70.16 mitochondrion	NULL	Non-secretory protein	F_Evol	F_Evol	F_Evol		0
1nc340_050	NCU02068	NCU02068	NCU02068	hypothetical protein	99 UNCLASSIFIED PROTEINS	;Extensin_2;BRCT;	Non-secretory protein	F_Evol	N_Evol	N_Evol		0
1nc340_080	NCU02070	NCU02070	NCU02070	probable car1 protein pex2 peroxisomal	41 DEVELOPMENT (Systemic)_41.01 fungal/microorganismic development_42 BIOGENESIS OF CELLULAR COMPONENTS_42.19 peroxisome_70 SUBCELLULAR LOCALIZATION_70.19 peroxisome	;Pex2_Pex12;zf-C3HC4;	Non-secretory protein	B_Evol	F_Evol	F_Evol		0
1nc340_090	NCU02071	NCU02071	NCU02071	hypothetical protein	99 UNCLASSIFIED PROTEINS	;Pal1;	Non-secretory protein	F_Evol	F_Evol	F_Evol		0
1nc340_110	NCU02074	NCU02074	NCU02074	related to ERO1 protein, required for protein disulfide bond formation in the ER	14 PROTEIN FATE (folding, modification, destination)_14.07 protein modification_70 SUBCELLULAR LOCALIZATION_70.07 endoplasmic reticulum	;ERO1;	Signal peptide	E_Evol	B_Evol	F_Evol		0
1nc340_120	NCU02075	NCU02075	NCU02075	probable heat shock protein 70	14 PROTEIN FATE (folding, modification, destination)_14.01 protein folding and stabilization_32 CELL RESCUE, DEFENSE AND VIRULENCE_32.01 stress response_32.01.05 heat shock response_70 SUBCELLULAR LOCALIZATION_70.03 cytoplasm	;HSP70;DUF964;	Non-secretory protein	E_Evol	E_Evol	E_Evol		0
1nc340_130	NCU02076	NCU02076	NCU02076	probable translation initiation factor eIF-4E	12 PROTEIN SYNTHESIS_12.04 translation_12.04.01 translation initiation_70 SUBCELLULAR LOCALIZATION_70.03 cytoplasm	;IF4E;	Non-secretory protein	E_Evol	E_Evol	B_Evol		0
1nc340_140	NCU02077	NCU02077	NCU02077	hypothetical protein	99 UNCLASSIFIED PROTEINS	NULL	Non-secretory protein	N_Evol	N_Evol	N_Evol		0
1nc340_150	NCU02078	NCU02078	NCU02078	hypothetical protein	99 UNCLASSIFIED PROTEINS	;Bromodomain;DUF1777;Suf;Bromodomain;	Non-secretory protein	F_Evol	F_Evol	F_Evol		0
1nc340_170	NCU02080	NCU02080	NCU02080	putative protein	99 UNCLASSIFIED PROTEINS	NULL	Signal peptide	F_Evol	F_Evol	N_Evol		0
1nc340_190	NCU02082	NCU02082	NCU02082	related to pre-mRNA 3`-end processing factor CF II	11 TRANSCRIPTION_11.04 RNA processing_11.04.03 mRNA processing (splicing, 5'-, 3'-end processing)_11.04.03.01 splicing_70 SUBCELLULAR LOCALIZATION_70.10 nucleus	;CPSF_A;	Non-secretory protein	E_Evol	A_Evol	F_Evol		0
1nc340_200	NCU02083	NCU02083	NCU02083	related to phosphatidylinositol 3-phosphate 5-kinase	01 METABOLISM_01.06 lipid, fatty acid and isoprenoid metabolism_14 PROTEIN FATE (folding, modification, destination)_14.04 protein targeting, sorting and translocation_20 CELLULAR TRANSPORT, TRANSPORT FACILITIES AND TRANSPORT ROUTES_20.09 transport routes_20.09.13 vacuolar/lysosomal transport_42 BIOGENESIS OF CELLULAR COMPONENTS_42.25 vacuole or lysosome	;DUF1388;FYVE;C1_3;C1_4;Cpn60_TCP1;DREPP;PIP5K;	Non-secretory protein	E_Evol	F_Evol	F_Evol		0
1nc340_210	NCU02084	NCU02084	NCU02084	related to agmatinase	01 METABOLISM_01.01 amino acid metabolism_01.01.05 metabolism of urea cycle, creatine and polyamines_01.01.05.01 metabolism of polyamines_01.01.05.01.01 biosynthesis of polyamines	;Arginase;	Signal peptide	E_Evol	E_Evol	E_Evol		0
1nc340_220	NCU02085	NCU02085	NCU02085	hypothetical protein	99 UNCLASSIFIED PROTEINS	NULL	Non-secretory protein	N_Evol	N_Evol	N_Evol		0
1nc342_010	NCU02086	NCU02086	NCU02086	hypothetical protein	99 UNCLASSIFIED PROTEINS	NULL	Non-secretory protein	F_Evol	F_Evol	F_Evol		0
1nc342_020	NCU02087	NCU02087	NCU02087	hypothetical protein	99 UNCLASSIFIED PROTEINS	;Extensin_2;	Signal peptide	N_Evol	N_Evol	N_Evol		0
1nc342_030	NCU02088	NCU02088	NCU02088	hypothetical protein	99 UNCLASSIFIED PROTEINS	;SET;	Non-secretory protein	N_Evol	N_Evol	N_Evol		0
1nc342_040	NCU02089	NCU02089	NCU02089	conserved hypothetical protein	99 UNCLASSIFIED PROTEINS	;MFS_1;	Non-secretory protein	B_Evol	F_Evol	F_Evol		0
1nc346_020	NCU02094	NCU02094	NCU02094	related to zinc finger transcription factor	01 METABOLISM_01.01 amino acid metabolism_01.01.13 regulation of amino acid metabolism_11 TRANSCRIPTION_11.02 RNA synthesis_11.02.03 mRNA synthesis_11.02.03.04 transcriptional control	;Zn_clus;	Non-secretory protein	F_Evol	F_Evol	F_Evol		0
1nc346_030	NCU02095	NCU02095	NCU02095	hypothetical protein	99 UNCLASSIFIED PROTEINS	NULL	Signal peptide	F_Evol	N_Evol	N_Evol		0
1nc346_040	NCU02096	NCU02096	NCU02096	probable flavohemoglobin	01 METABOLISM_01.02 nitrogen, sulfur and selenium metabolism_20 CELLULAR TRANSPORT, TRANSPORT FACILITIES AND TRANSPORT ROUTES_20.01 transported compounds (substrates)_20.01.15 electron transport_32 CELL RESCUE, DEFENSE AND VIRULENCE_32.05 disease, virulence and defense_32.05.01 resistance proteins_32.05.01.03 chemical agent resistance	;Globin;FAD_binding_6;NAD_binding_1;	Non-secretory protein	E_Evol	E_Evol	E_Evol		0
1nc346_050	NCU02097	NCU02097	NCU02097	related to D-arabinitol 2-dehydrogenase	01 METABOLISM_01.05 C-compound and carbohydrate metabolism	;AlaDh_PNT_C;adh_short;KR;Pyr_redox;Epimerase;3Beta_HSD;3HCDH_N;	Non-secretory protein	E_Evol	B_Evol	B_Evol		0
1nc346_060	NCU02098	NCU02098	NCU02098	related to G/U mismatch-specific uracil DNA glycosylase	10 CELL CYCLE AND DNA PROCESSING_10.01 DNA processing_10.01.05 DNA recombination and DNA repair_10.01.05.01 DNA repair_16 PROTEIN WITH BINDING FUNCTION OR COFACTOR REQUIREMENT (structural or catalytic)_16.03 nucleic acid binding_16.03.01 DNA binding	;UDG;	Non-secretory protein	B_Evol	F_Evol	F_Evol		0
1nc346_070	NCU02099	NCU02099	NCU02099	hypothetical protein	99 UNCLASSIFIED PROTEINS	;GRP;	Signal peptide	F_Evol	F_Evol	F_Evol		0
1nc348_010	NCU02100	NCU02100	NCU02100	conserved hypothetical protein	99 UNCLASSIFIED PROTEINS	;TatC;OPT;MFS_1;LMBR1;Ion_trans;E1-E2_ATPase;Herpes_glycop;DUF540;DUF95;	Non-secretory protein	O_Evol	O_Evol	F_Evol		0
1nc348_060	NCU02103	NCU02103	NCU02103	probable DNA-directed RNA polymerase II largest chain	11 TRANSCRIPTION_11.02 RNA synthesis_11.02.03 mRNA synthesis_70 SUBCELLULAR LOCALIZATION_70.10 nucleus	;RNA_pol_Rpb1_1;RNA_pol_Rpb1_2;RNA_pol_Rpb1_3;RNA_pol_Rpb1_4;RNA_pol_Rpb1_5;RNA_pol_Rpb1_6;RNA_pol_Rpb1_7;Tymo_45kd_70kd;RNA_pol_Rpb1_R;RNA_pol_Rpb1_R;RNA_pol_Rpb1_R;RNA_pol_Rpb1_R;RNA_pol_Rpb1_R;RNA_pol_Rpb1_R;RNA_pol_Rpb1_R;RNA_pol_Rpb1_R;RNA_pol_Rpb1_R;RNA_pol_Rpb1_R;	Non-secretory protein	E_Evol	E_Evol	E_Evol		0
1nc348_070	NCU02104	NCU02104	NCU02104	related to COMPASS component SWD1	10 CELL CYCLE AND DNA PROCESSING_10.01 DNA processing_10.01.09 DNA restriction or modification_10.01.09.05 DNA conformation modification (e.g. chromatin)_11 TRANSCRIPTION_11.02 RNA synthesis_11.02.03 mRNA synthesis_11.02.03.04 transcriptional control_14 PROTEIN FATE (folding, modification, destination)_14.07 protein modification_14.07.09 posttranslational modification of amino acids (e.g. hydroxy…	;WD40;WD40;WD40;	Non-secretory protein	E_Evol	E_Evol	A_Evol		0
1nc348_090	NCU02106	NCU02106	NCU02106	hypothetical protein	99 UNCLASSIFIED PROTEINS	;G-patch;	Non-secretory protein	B_Evol	F_Evol	F_Evol		0
1nc348_100	NCU02107	NCU02107	NCU02107	related to malonyl CoA synthetase	01 METABOLISM_01.06 lipid, fatty acid and isoprenoid metabolism	;AMP-binding;	Non-secretory protein	E_Evol	E_Evol	E_Evol		0
1nc348_110	NCU02108	NCU02108	NCU02108	conserved hypothetical protein	99 UNCLASSIFIED PROTEINS	;BolA;	Non-secretory protein	E_Evol	E_Evol	E_Evol		0
1nc348_120	NCU02109	NCU02109	NCU02109	probable UDP-N-acetylglucosamine pyrophosphorylase	01 METABOLISM_01.05 C-compound and carbohydrate metabolism_42 BIOGENESIS OF CELLULAR COMPONENTS_42.01 cell wall	;UDPGP;	Non-secretory protein	E_Evol	E_Evol	E_Evol		0
1nc348_130	NCU02110	NCU02110	NCU02110	probable NADPH oxidase heavy chain subunit	32 CELL RESCUE, DEFENSE AND VIRULENCE_32.07 detoxification_32.07.07 oxygen and radical detoxification_32.07.07.07 superoxide metabolism	;Ferric_reduct;FAD_binding_8;FAD_binding_6;NAD_binding_6;	Non-secretory protein	E_Evol	E_Evol	E_Evol		0
1nc348_140	NCU02111	NCU02111	NCU02111	probable myosin I heavy chain	20 CELLULAR TRANSPORT, TRANSPORT FACILITIES AND TRANSPORT ROUTES_20.09 transport routes_20.09.14 cytoskeleton-dependent transport_43 CELL TYPE DIFFERENTIATION_43.01 fungal/microorganismic cell type differentiation_43.01.03 fungal and other eukaryotic cell type differentiation_43.01.03.05 budding, cell polarity and filament formation	;Myosin_head;Molybdopterin;IQ;Myosin_TH1;Tymo_45kd_70kd;Extensin_2;SH3_1;SH3_2;	Non-secretory protein	E_Evol	E_Evol	E_Evol		0
1nc348_150	NCU02112	NCU02112	NCU02112	conserved hypothetical protein	99 UNCLASSIFIED PROTEINS	;WD40;WD40;WD40;RWD;zf-C3HC4;	Non-secretory protein	F_Evol	F_Evol	F_Evol		0
1nc348_160	NCU02113	NCU02113	NCU02113	probable ubiquitin-conjugating enzyme E2	14 PROTEIN FATE (folding, modification, destination)_14.07 protein modification_14.07.05 modification by ubiquitination, deubiquitination_14.13 protein/peptide degradation_14.13.01 cytoplasmic and nuclear protein degradation	;UQ_con;RWD;UEV;	Non-secretory protein	E_Evol	E_Evol	E_Evol		0
1nc348_170	NCU02114	NCU02114	NCU02114	related to to G1/S-specific cyclin	10 CELL CYCLE AND DNA PROCESSING_10.03 cell cycle_10.03.01 mitotic cell cycle and cell cycle control	;Cyclin_N;Cyclin_C;	Non-secretory protein	B_Evol	B_Evol	F_Evol		0
1nc352_010	NCU02115	NCU02115	NCU02115	conserved hypothetical protein	99 UNCLASSIFIED PROTEINS	;ZZ;C1_3;DUF1610;efhand;efhand;Dockerin_1;	Non-secretory protein	F_Evol	F_Evol	F_Evol		0
1nc352_020	NCU02116	NCU02116	NCU02116	conserved hypothetical protein	99 UNCLASSIFIED PROTEINS	;Lactamase_B;	Non-secretory protein	E_Evol	O_Evol	O_Evol		0
1nc352_030	NCU02117	NCU02117	NCU02117	probable glomerulosclerosis protein Mpv17	98 CLASSIFICATION NOT YET CLEAR-CUT	;Mpv17_PMP22;	Signal peptide	E_Evol	E_Evol	E_Evol		0
1nc352_040	NCU02118	NCU02118	NCU02118	conserved hypothetical protein	99 UNCLASSIFIED PROTEINS	;zf-DHHC;DUF1220;	Non-secretory protein	B_Evol	F_Evol	F_Evol		0
1nc352_050	NCU02119	NCU02119	NCU02119	related to capsular associated protein	98 CLASSIFICATION NOT YET CLEAR-CUT	;Spore_permease;LigA;	Non-secretory protein	F_Evol	F_Evol	F_Evol		0
1nc352_060	NCU02120	NCU02120	NCU02120	hypothetical protein	99 UNCLASSIFIED PROTEINS	;Extensin_2;TolA;Vicilin_N;SSDP;DUF1596;	Non-secretory protein	F_Evol	F_Evol	F_Evol		0
1nc356_010	NCU02121	NCU02121	NCU02121	conserved hypothetical protein	99 UNCLASSIFIED PROTEINS	;PHD;PAPA-1;	Non-secretory protein	F_Evol	F_Evol	F_Evol		0
1nc356_030	NCU02123	NCU02123	NCU02123	conserved hypothetical protein	99 UNCLASSIFIED PROTEINS	;DUF258;MMR_HSR1;Miro;	Non-secretory protein	E_Evol	A_Evol	F_Evol		0
1nc356_040	NCU02124	NCU02124	NCU02124	conserved hypothetical protein	99 UNCLASSIFIED PROTEINS	;DLH;	Non-secretory protein	E_Evol	E_Evol	B_Evol		0
1nc356_050	NCU02125	NCU02125	NCU02125	conserved hypothetical protein	99 UNCLASSIFIED PROTEINS	;NUDIX;	Non-secretory protein	F_Evol	F_Evol	F_Evol		0
1nc356_070	NCU02127	NCU02127	NCU02127	probable methylcrotonyl-CoA carboxylase beta chain, mitochondrial precursor	01 METABOLISM_01.01 amino acid metabolism_01.01.11 metabolism of the pyruvate family (alanine, isoleucine, leucine, valine) and D-alanine_01.01.11.04 metabolism of leucine_01.01.11.04.02 degradation of leucine_70 SUBCELLULAR LOCALIZATION_70.16 mitochondrion	;Col_cuticle_N;Carboxyl_trans;	Non-secretory protein	E_Evol	E_Evol	E_Evol		0
1nc356_090	NCU02130	NCU02130	NCU02130	hypothetical protein	99 UNCLASSIFIED PROTEINS	;Drf_FH1;Extensin_2;	Non-secretory protein	F_Evol	F_Evol	N_Evol		0
1nc356_110	NCU02132	NCU02132	NCU02132	hypothetical protein	99 UNCLASSIFIED PROTEINS	NULL	Non-secretory protein	N_Evol	N_Evol	N_Evol	7nc470_570	0
1nc356_120	NCU02133	NCU02133	NCU02133	superoxide dismutase [Cu-Zn] SOD-1	32 CELL RESCUE, DEFENSE AND VIRULENCE_32.07 detoxification_32.07.07 oxygen and radical detoxification_32.07.07.07 superoxide metabolism	;Sod_Cu;	Non-secretory protein	E_Evol	E_Evol	E_Evol		0
1nc356_130	NCU02134	NCU02134	NCU02134	probable 100 kDa protein P100	98 CLASSIFICATION NOT YET CLEAR-CUT	;SNase;SBDS;SNase;SNase;SNase;TUDOR;SMN;	Non-secretory protein	E_Evol	E_Evol	E_Evol		0
1nc356_140	NCU02136	NCU02136	NCU02136	probable transaldolase	01 METABOLISM_01.05 C-compound and carbohydrate metabolism_02 ENERGY_02.07 pentose-phosphate pathway_70 SUBCELLULAR LOCALIZATION_70.03 cytoplasm	;Transaldolase;	Non-secretory protein	E_Evol	E_Evol	E_Evol		0
1nc356_150	NCU02137	NCU02137	NCU02137	related to pig-c protein	98 CLASSIFICATION NOT YET CLEAR-CUT	;GPI2;	Non-secretory protein	F_Evol	F_Evol	F_Evol		0
1nc356_160	NCU02138	NCU02138	NCU02138	hypothetical protein	99 UNCLASSIFIED PROTEINS	NULL	Signal peptide	N_Evol	N_Evol	N_Evol		0
1nc356_170	NCU02139	NCU02139	NCU02139	related to annexin XIV	16 PROTEIN WITH BINDING FUNCTION OR COFACTOR REQUIREMENT (structural or catalytic)_16.17 metal binding_16.17.01 calcium binding_20 CELLULAR TRANSPORT, TRANSPORT FACILITIES AND TRANSPORT ROUTES_20.09 transport routes_20.09.16 cellular export and secretion_20.09.18 cellular import_20.09.18.09 vesicular cellular import_20.09.18.09.01 endocytosis_34 INTERACTION WITH THE ENVIRONMENT_34.01 homeostasis_…	;Extensin_2;BDHCT;Annexin;	Non-secretory protein	F_Evol	F_Evol	F_Evol		0
1nc356_180	NCU02142	NCU02142	NCU02142	related to zinc cluster transcription factor	11 TRANSCRIPTION_11.02 RNA synthesis_11.02.03 mRNA synthesis_11.02.03.04 transcriptional control_32 CELL RESCUE, DEFENSE AND VIRULENCE_32.05 disease, virulence and defense_32.05.01 resistance proteins_32.05.01.03 chemical agent resistance	;Zn_clus;	Non-secretory protein	F_Evol	F_Evol	F_Evol		0
1nc356_190	NCU02144	NCU02144	NCU02144	hypothetical protein	99 UNCLASSIFIED PROTEINS	NULL	Non-secretory protein	N_Evol	N_Evol	N_Evol		0
1nc360_010	NCU02145	NCU02145	NCU02145	hypothetical protein	99 UNCLASSIFIED PROTEINS	NULL	Non-secretory protein	N_Evol	N_Evol	N_Evol		0
1nc360_030	NCU02147	NCU02147	NCU02147	conserved hypothetical protein	99 UNCLASSIFIED PROTEINS	;Ank;Ank;Cgr1;	Non-secretory protein	E_Evol	E_Evol	B_Evol		0
1nc360_040	NCU02148	NCU02148	NCU02148	related to triacylglycerol lipase	01 METABOLISM_01.06 lipid, fatty acid and isoprenoid metabolism	;Abhydro_lipase;Abhydrolase_1;	Non-secretory protein	B_Evol	B_Evol	B_Evol		0
1nc360_050	NCU02149	NCU02149	NCU02149	related to PET191 protein, involved in assembly of cytochrome oxidase	14 PROTEIN FATE (folding, modification, destination)_14.10 assembly of protein complexes_70 SUBCELLULAR LOCALIZATION_70.16 mitochondrion	NULL	Non-secretory protein	B_Evol	F_Evol	F_Evol		0
1nc360_060	NCU02150	NCU02150	NCU02150	hypothetical protein	99 UNCLASSIFIED PROTEINS	;Metallophos;	Non-secretory protein	F_Evol	N_Evol	N_Evol		0
1nc360_070	NCU02151	NCU02151	NCU02151	conserved hypothetical protein	99 UNCLASSIFIED PROTEINS	;WD40;WD40;WD40;WD40;WD40;	Non-secretory protein	E_Evol	B_Evol	F_Evol		0
1nc360_090	NCU02152	NCU02152	NCU02152	hypothetical protein	99 UNCLASSIFIED PROTEINS	;RRM_1;	Non-secretory protein	B_Evol	B_Evol	B_Evol		0
1nc360_100	NCU02153	NCU02153	NCU02153	conserved hypothetical protein	99 UNCLASSIFIED PROTEINS	;Thioredoxin;UBX;	Non-secretory protein	O_Evol	F_Evol	F_Evol		0
1nc360_110	NCU02154	NCU02154	NCU02154	related to small unique nuclear receptor co-repressor	11 TRANSCRIPTION_11.02 RNA synthesis_11.02.03 mRNA synthesis_11.02.03.04 transcriptional control_11.02.03.04.03 transcription repression_70 SUBCELLULAR LOCALIZATION_70.10 nucleus	;C1D;COX17;CHCH;	Non-secretory protein	F_Evol	N_Evol	N_Evol		0
1nc360_140	NCU02157	NCU02157	NCU02157	probable COQ4 protein, responsible for restoring ubiquinone biosynthesis	01 METABOLISM_01.07 metabolism of vitamins, cofactors, and prosthetic groups_01.07.01 biosynthesis of vitamins, cofactors, and prosthetic groups_70 SUBCELLULAR LOCALIZATION_70.16 mitochondrion	;Coq4;	Non-secretory protein	E_Evol	E_Evol	B_Evol		0
1nc360_150	NCU02158	NCU02158	NCU02158	conserved hypothetical protein	99 UNCLASSIFIED PROTEINS	;SET;	Non-secretory protein	F_Evol	F_Evol	F_Evol		0
1nc360_160	NCU02159	NCU02159	NCU02159	hypothetical protein	99 UNCLASSIFIED PROTEINS	;Vicilin_N;RRM_1;GRP;	Non-secretory protein	E_Evol	B_Evol	F_Evol		0
1nc360_170	NCU02160	NCU02160	NCU02160	probable GTP-binding protein rac1	16 PROTEIN WITH BINDING FUNCTION OR COFACTOR REQUIREMENT (structural or catalytic)_16.19 nucleotide/nucleoside/nucleobase binding_16.19.05 GTP binding_30 CELLULAR COMMUNICATION/SIGNAL TRANSDUCTION MECHANISM_30.01 cellular signalling_30.01.05 enzyme mediated signal transduction_30.01.05.05 G-protein mediated signal transduction	;Arf;Miro;Ras;	Non-secretory protein	E_Evol	E_Evol	E_Evol		0
1nc360_180	NCU02161	NCU02161	NCU02161	conserved hypothetical protein	99 UNCLASSIFIED PROTEINS	;Histone;CBFD_NFYB_HMF;	Non-secretory protein	F_Evol	F_Evol	F_Evol		0
1nc360_190	NCU02162	NCU02162	NCU02162	related to SURF1 protein	14 PROTEIN FATE (folding, modification, destination)_14.10 assembly of protein complexes	;SURF1;	Non-secretory protein	E_Evol	E_Evol	F_Evol		0
1nc360_210	NCU02164	NCU02164	NCU02164	putative protein	99 UNCLASSIFIED PROTEINS	;CytB6-F_Fe-S;	Signal peptide	F_Evol	F_Evol	F_Evol		0
1nc360_220	NCU02165	NCU02165	NCU02165	hypothetical protein	99 UNCLASSIFIED PROTEINS	;Extensin_2;OapA_N;EGF_2;	Non-secretory protein	F_Evol	F_Evol	F_Evol		0
1nc360_240	NCU02167	NCU02167	NCU02167	novel protein of ras superfamily KREV-1 KREV-1	16 PROTEIN WITH BINDING FUNCTION OR COFACTOR REQUIREMENT (structural or catalytic)_16.19 nucleotide/nucleoside/nucleobase binding_16.19.05 GTP binding_30 CELLULAR COMMUNICATION/SIGNAL TRANSDUCTION MECHANISM_30.01 cellular signalling_30.01.05 enzyme mediated signal transduction_30.01.05.05 G-protein mediated signal transduction_43 CELL TYPE DIFFERENTIATION_43.01 fungal/microorganismic cell type di…	;Arf;GTP_EFTU;Miro;Ras;	Non-secretory protein	E_Evol	E_Evol	E_Evol		0
1nc360_250	NCU02168	NCU02168	NCU02168	conserved hypothetical protein	99 UNCLASSIFIED PROTEINS	;PQ-loop;	Signal peptide	B_Evol	A_Evol	F_Evol		0
1nc360_260	NCU02169	NCU02169	NCU02169	conserved hypothetical protein	99 UNCLASSIFIED PROTEINS	;DEAD;	Non-secretory protein	E_Evol	F_Evol	F_Evol		0
1nc360_270	NCU02170	NCU02170	NCU02170	putative protein	99 UNCLASSIFIED PROTEINS	;CFEM;	Signal peptide	N_Evol	N_Evol	N_Evol		0
1nc360_290	NCU02172	NCU02172	NCU02172	putative protein	99 UNCLASSIFIED PROTEINS	NULL	Non-secretory protein	F_Evol	F_Evol	F_Evol		0
1nc380_006	NCU02173	NCU02173	NCU02173	related to transcription factor RegA	11 TRANSCRIPTION_11.02 RNA synthesis_11.02.03 mRNA synthesis_11.02.03.04 transcriptional control	;zf-C2H2;zf-C3HC4;zf-C2H2;Zn_clus;	Non-secretory protein	F_Evol	N_Evol	N_Evol	1nc710_040	0
1nc380_008	NCU02174	NCU02174	NCU02174	hypothetical protein	99 UNCLASSIFIED PROTEINS	NULL	Non-secretory protein	N_Evol	N_Evol	N_Evol		0
1nc380_010	NCU02175	NCU02175	NCU02175	related to 1-phosphatidylinositol-4,5-bisphosphate phosphodiesterase	01 METABOLISM_01.06 lipid, fatty acid and isoprenoid metabolism	;PI-PLC-X;PI-PLC-Y;	Non-secretory protein	F_Evol	F_Evol	F_Evol		0
1nc380_020	NCU02176	NCU02176	NCU02176	conserved hypothetical protein	99 UNCLASSIFIED PROTEINS	;2OG-FeII_Oxy;	Non-secretory protein	E_Evol	E_Evol	B_Evol		0
1nc380_030	NCU02177	NCU02177	NCU02177	hypothetical protein	99 UNCLASSIFIED PROTEINS	NULL	Non-secretory protein	F_Evol	F_Evol	F_Evol		0
1nc380_060	NCU02179	NCU02179	NCU02179	probable D-lactate dehydrogenase (cytochrome)	01 METABOLISM_01.05 C-compound and carbohydrate metabolism	;FAD_binding_4;FAD-oxidase_C;	Non-secretory protein	E_Evol	E_Evol	E_Evol		0
1nc380_070	NCU02181	NCU02181	NCU02181	probable ribosomal protein S4.e, cytosolic	12 PROTEIN SYNTHESIS_12.01 ribosome biogenesis_12.01.01 ribosomal proteins	;RS4NT;S4;Ribosomal_S4e;KOW;	Non-secretory protein	E_Evol	E_Evol	E_Evol		0
1nc380_080	NCU02182	NCU02182	NCU02182	conserved hypothetical protein	99 UNCLASSIFIED PROTEINS	;Extensin_2;SSDP;HPC2;Drf_FH1;Myb_DNA-binding;SLIDE;Myb_DNA-binding;	Non-secretory protein	F_Evol	F_Evol	F_Evol		0
1nc380_090	NCU02184	NCU02184	NCU02184	related to endochitinase 2 precursor	01 METABOLISM_01.05 C-compound and carbohydrate metabolism	;Glyco_hydro_18;Pentapeptide_2;DUF765;DUF765;	Non-secretory protein	F_Evol	N_Evol	N_Evol	4nc452_440	0
7nc536_010	NCU02188	NCU02188	NCU02188	related to high-affinity glucose transporter	20 CELLULAR TRANSPORT, TRANSPORT FACILITIES AND TRANSPORT ROUTES_20.01 transported compounds (substrates)_20.01.03 C-compound and carbohydrate transport_20.09 transport routes_20.09.18 cellular import_20.09.18.07 non-vesicular cellular import	;MFS_1;Sugar_tr;DsbD;	Non-secretory protein	E_Evol	B_Evol	B_Evol		0
7nc536_020	NCU02189	NCU02189	NCU02189	hypothetical protein	99 UNCLASSIFIED PROTEINS	NULL	Signal peptide	B_Evol	B_Evol	F_Evol		0
7nc536_030	NCU02190	NCU02190	NCU02190	related to KES1 protein	01 METABOLISM_01.06 lipid, fatty acid and isoprenoid metabolism	;Oxysterol_BP;	Non-secretory protein	B_Evol	B_Evol	F_Evol		0
7nc536_040	NCU02191	NCU02191	NCU02191	conserved hypothetical protein	99 UNCLASSIFIED PROTEINS	NULL	Signal peptide	F_Evol	F_Evol	F_Evol		0
7nc536_050	NCU02192	NCU02192	NCU02192	hypothetical protein	99 UNCLASSIFIED PROTEINS	NULL	Signal peptide	F_Evol	N_Evol	N_Evol		0
7nc536_060	NCU02193	NCU02193	NCU02193	pyruvate decarboxylase (P59Nc) CFP	02 ENERGY_02.16 fermentation_02.16.01 alcohol fermentation_70 SUBCELLULAR LOCALIZATION_70.03 cytoplasm	;TPP_enzyme_N;TPP_enzyme_M;TPP_enzyme_C;TPP_enzyme_N;TPP_enzyme_M;TPP_enzyme_C;	Non-secretory protein	E_Evol	E_Evol	E_Evol		0
7nc536_070	NCU02194	NCU02194	NCU02194	hypothetical protein	99 UNCLASSIFIED PROTEINS	;NACHT;	Non-secretory protein	F_Evol	N_Evol	N_Evol		0
7nc536_080	NCU02195	NCU02195	NCU02195	related to methionine transport protein, high affinity	20 CELLULAR TRANSPORT, TRANSPORT FACILITIES AND TRANSPORT ROUTES_20.01 transported compounds (substrates)_20.01.07 amino acid/amino acid derivatives transport_20.09 transport routes_20.09.18 cellular import_20.09.18.07 non-vesicular cellular import_70 SUBCELLULAR LOCALIZATION_70.02 eukaryotic plasma membrane / membrane attached	;Aa_trans;Spore_permease;AA_permease;MFS_1;UPF0233;	Non-secretory protein	B_Evol	B_Evol	B_Evol		0
7nc536_090	NCU02196	NCU02196	NCU02196	conserved hypothetical protein	99 UNCLASSIFIED PROTEINS	;TauD;	Non-secretory protein	E_Evol	B_Evol	B_Evol		0
7nc536_100	NCU02197	NCU02197	NCU02197	related to B2-aldehyde-forming enzyme	01 METABOLISM_01.07 metabolism of vitamins, cofactors, and prosthetic groups_01.07.03 catabolism of vitamins, cofactors, and prosthetic groups	;Barwin;DPBB_1;	Signal peptide	E_Evol	E_Evol	B_Evol		0
7nc536_110	NCU02198	NCU02198	NCU02198	related to pepsin F precursor	14 PROTEIN FATE (folding, modification, destination)_14.13 protein/peptide degradation	;Asp;	Signal peptide	E_Evol	N_Evol	N_Evol	b13d24_090	0
7nc536_120	NCU02199	NCU02199	NCU02199	hypothetical protein	99 UNCLASSIFIED PROTEINS	NULL	Signal peptide	F_Evol	F_Evol	N_Evol		0
7nc536_140	NCU02200	NCU02200	NCU02200	related to phosphatidylinositol transfer protein	20 CELLULAR TRANSPORT, TRANSPORT FACILITIES AND TRANSPORT ROUTES_20.01 transported compounds (substrates)_20.01.13 lipid/fatty acid transport	;CRAL_TRIO_N;CRAL_TRIO;	Non-secretory protein	B_Evol	B_Evol	F_Evol		0
7nc536_150	NCU02201	NCU02201	NCU02201	probable laccase 2	01 METABOLISM_01.05 C-compound and carbohydrate metabolism_01.05.11 aromate metabolism_01.05.11.07 aromate catabolism_01.05.11.07.01 aerobic aromate catabolism_32 CELL RESCUE, DEFENSE AND VIRULENCE_32.07 detoxification_32.07.09 detoxification by degradation	;Cu-oxidase_3;Cu-oxidase;Cu-oxidase_2;	Signal peptide	E_Evol	B_Evol	F_Evol		0
7nc534_010	NCU02202	NCU02202	NCU02202	related to protein kinase IRE1 precursor	01 METABOLISM_01.06 lipid, fatty acid and isoprenoid metabolism_01.06.10 regulation of lipid, fatty acid and isoprenoid metabolism_14 PROTEIN FATE (folding, modification, destination)_14.07 protein modification_14.07.03 modification by phosphorylation, dephosphorylation, autophosphorylation_30 CELLULAR COMMUNICATION/SIGNAL TRANSDUCTION MECHANISM_30.01 cellular signalling_30.01.05 enzyme mediated …	;PQQ;PQQ;Kdo;Pkinase;Pkinase_Tyr;APH;DUF636;Ribonuc_2-5A;	Non-secretory protein	E_Evol	B_Evol	F_Evol		0
7nc534_020	NCU02203	NCU02203	NCU02203	conserved hypothetical protein	99 UNCLASSIFIED PROTEINS	;zf-C3HC4;E_raikovi_mat;zf-C2H2;zf-C2H2;zf-C2H2;SSDP;	Non-secretory protein	E_Evol	B_Evol	F_Evol		0
7nc534_030	NCU02204	NCU02204	NCU02204	conserved hypothetical protein	99 UNCLASSIFIED PROTEINS	;DEK_C;DUF1777;SWIB;	Non-secretory protein	E_Evol	E_Evol	B_Evol		0
7nc534_040	NCU02205	NCU02205	NCU02205	hypothetical protein	99 UNCLASSIFIED PROTEINS	NULL	Non-secretory protein	N_Evol	N_Evol	N_Evol		0
7nc534_050	NCU02206	NCU02206	NCU02206	putative protein	99 UNCLASSIFIED PROTEINS	NULL	Non-secretory protein	F_Evol	F_Evol	F_Evol		0
7nc534_060	NCU02207	NCU02207	NCU02207	probable chaperonin of the TCP1 ring complex, cytosolic	14 PROTEIN FATE (folding, modification, destination)_14.01 protein folding and stabilization_42 BIOGENESIS OF CELLULAR COMPONENTS_42.04 cytoskeleton/structural proteins_70 SUBCELLULAR LOCALIZATION_70.03 cytoplasm	;Cpn60_TCP1;	Non-secretory protein	E_Evol	E_Evol	E_Evol		0
7nc534_070	NCU02208	NCU02208	NCU02208	related to translation initiation factor eIF-3 Prt1 chain	12 PROTEIN SYNTHESIS_12.04 translation_12.04.01 translation initiation	;RRM_1;DPPIV_N;eIF2A;	Non-secretory protein	E_Evol	E_Evol	E_Evol		0
7nc534_080	NCU02209	NCU02209	NCU02209	probable oleate delta-12 desaturase	01 METABOLISM_01.06 lipid, fatty acid and isoprenoid metabolism	;FA_desaturase;	Non-secretory protein	E_Evol	E_Evol	E_Evol		0
7nc534_090	NCU02211	NCU02211	NCU02211	conserved hypothetical protein	99 UNCLASSIFIED PROTEINS	;TBC;	Non-secretory protein	O_Evol	F_Evol	F_Evol		0
7nc534_100	NCU02212	NCU02212	NCU02212	hypothetical protein	99 UNCLASSIFIED PROTEINS	;CNVH;	Signal peptide	N_Evol	N_Evol	N_Evol		0
7nc532_010	NCU02213	NCU02213	NCU02213	conserved hypothetical protein	99 UNCLASSIFIED PROTEINS	;DUF604;	Signal peptide	F_Evol	F_Evol	F_Evol		0
7nc532_020	NCU02214	NCU02214	NCU02214	conserved hypothetical protein	99 UNCLASSIFIED PROTEINS	;Zn_clus;GRP;Fungal_trans;	Non-secretory protein	F_Evol	F_Evol	F_Evol		0
7nc532_030	NCU02215	NCU02215	NCU02215	hypothetical protein	99 UNCLASSIFIED PROTEINS	NULL	Non-secretory protein	N_Evol	N_Evol	N_Evol		0
7nc532_040	NCU02216	NCU02216	NCU02216	related to glycosylphosphatidylinositol (GPI)-anchored membrane protein	42 BIOGENESIS OF CELLULAR COMPONENTS_42.01 cell wall	;SoxE;Glyco_hydro_76;	Signal peptide	B_Evol	A_Evol	A_Evol		0
7nc530_010	NCU02217	NCU02217	NCU02217	conserved hypothetical protein	99 UNCLASSIFIED PROTEINS	;CHCH;DUF1903;	Non-secretory protein	E_Evol	B_Evol	B_Evol		0
7nc530_020	NCU02218	NCU02218	NCU02218	conserved hypothetical protein	99 UNCLASSIFIED PROTEINS	;Dehydrin;	Non-secretory protein	F_Evol	F_Evol	F_Evol		0
7nc530_030	NCU02219	NCU02219	NCU02219	putative protein	99 UNCLASSIFIED PROTEINS	;PalI;DUF131;	Signal peptide	F_Evol	F_Evol	F_Evol		0
7nc530_040	NCU02220	NCU02220	NCU02220	conserved hypothetical protein	99 UNCLASSIFIED PROTEINS	;DSBA;	Non-secretory protein	E_Evol	E_Evol	O_Evol		0
7nc530_050	NCU02221	NCU02221	NCU02221	hypothetical protein	99 UNCLASSIFIED PROTEINS	;DASH_Spc34;	Non-secretory protein	F_Evol	F_Evol	F_Evol		0
7nc530_060	NCU02222	NCU02222	NCU02222	hypothetical protein	99 UNCLASSIFIED PROTEINS	;Drf_FH1;	Non-secretory protein	F_Evol	F_Evol	F_Evol		0
7nc530_070	NCU02223	NCU02223	NCU02223	related to general RNA polymerase II transcription factor TAF12	11 TRANSCRIPTION_11.02 RNA synthesis_11.02.03 mRNA synthesis_11.02.03.01 general transcription activities_11.02.03.04 transcriptional control	;TFIID_20kDa;	Non-secretory protein	B_Evol	F_Evol	F_Evol		0
7nc530_080	NCU02224	NCU02224	NCU02224	probable 26S proteasome regulatory subunit p58	14 PROTEIN FATE (folding, modification, destination)_14.13 protein/peptide degradation_14.13.01 cytoplasmic and nuclear protein degradation	;TPR_1;TPR_2;PCI;Rpn3_C;	Non-secretory protein	E_Evol	E_Evol	E_Evol		0
7nc530_090	NCU02225	NCU02225	NCU02225	conserved hypothetical protein	99 UNCLASSIFIED PROTEINS	;MoCF_biosynth;	Non-secretory protein	F_Evol	F_Evol	F_Evol		0
7nc530_100	NCU02226	NCU02226	NCU02226	probable cig2 protein (putative GDP-GTP exchange factor)	12 PROTEIN SYNTHESIS_12.07 translational control	;IF-2B;	Non-secretory protein	E_Evol	E_Evol	E_Evol		0
7nc530_110	NCU02227	NCU02227	NCU02227	conserved hypothetical protein	99 UNCLASSIFIED PROTEINS	;Peptidase_M28;Peptidase_M20;M20_dimer;	Signal peptide	E_Evol	A_Evol	F_Evol		0
7nc530_120	NCU02228	NCU02228	NCU02228	related to geranylgeranyltransferase beta subunit	14 PROTEIN FATE (folding, modification, destination)_14.07 protein modification_14.07.01 modification with fatty acids (e.g. myristylation, palmitylation, farnesylation)	;Prenyltrans;Prenyltrans;Prenyltrans;Prenyltrans;	Non-secretory protein	E_Evol	F_Evol	F_Evol		0
7nc530_130	NCU02229	NCU02229	NCU02229	hypothetical protein	99 UNCLASSIFIED PROTEINS	NULL	Signal peptide	F_Evol	F_Evol	F_Evol		0
7nc530_140	NCU02230	NCU02230	NCU02230	DNA mismatch repair protein MSH2 MSH-2	10 CELL CYCLE AND DNA PROCESSING_10.01 DNA processing_10.01.05 DNA recombination and DNA repair_10.01.05.01 DNA repair	;MutS_I;MutS_II;MutS_III;MutS_IV;MutS_V;	Non-secretory protein	E_Evol	E_Evol	E_Evol		0
7nc530_150	NCU02231	NCU02231	NCU02231	conserved hypothetical protein	99 UNCLASSIFIED PROTEINS	;TolA;tRNA_m1G_MT;TT_ORF2;	Non-secretory protein	E_Evol	B_Evol	F_Evol		0
7nc530_160	NCU02232	NCU02232	NCU02232	related to DNA primase 48K protein PRI1	10 CELL CYCLE AND DNA PROCESSING_10.01 DNA processing_10.01.03 DNA synthesis and replication	;DNA_primase_S;	Non-secretory protein	E_Evol	E_Evol	B_Evol		0
7nc530_170	NCU02233	NCU02233	NCU02233	conserved hypothetical protein	99 UNCLASSIFIED PROTEINS	;Cellulase;	Non-secretory protein	E_Evol	B_Evol	B_Evol		0
7nc530_180	NCU02234	NCU02234	NCU02234	related to bck1-like MAPKKK (ask1)	14 PROTEIN FATE (folding, modification, destination)_14.07 protein modification_14.07.03 modification by phosphorylation, dephosphorylation, autophosphorylation_30 CELLULAR COMMUNICATION/SIGNAL TRANSDUCTION MECHANISM_30.01 cellular signalling_30.01.05 enzyme mediated signal transduction_30.01.05.01 protein kinase_30.01.05.01.03 MAPKKK cascade	;Extensin_2;DUF1777;TolA;Pkinase;Pkinase_Tyr;	Non-secretory protein	B_Evol	F_Evol	F_Evol		0
7nc529_010	NCU02235	NCU02235	NCU02235	related to class I alpha-mannosidase 1A	01 METABOLISM_01.05 C-compound and carbohydrate metabolism_14 PROTEIN FATE (folding, modification, destination)_14.07 protein modification	;Glyco_hydro_47;	Non-secretory protein	B_Evol	F_Evol	F_Evol		0
7nc529_020	NCU02236	NCU02236	NCU02236	putative protein	99 UNCLASSIFIED PROTEINS	;DUF755;SASP_gamma;RNA_polI_A34;	Non-secretory protein	F_Evol	F_Evol	N_Evol		0
7nc529_030	NCU02237	NCU02237	NCU02237	conserved hypothetical protein	99 UNCLASSIFIED PROTEINS	;NUC156;Autophagy_N;	Non-secretory protein	F_Evol	F_Evol	F_Evol		0
7nc529_040	NCU02238	NCU02238	NCU02238	related to nicotinamide mononucleotide permease	20 CELLULAR TRANSPORT, TRANSPORT FACILITIES AND TRANSPORT ROUTES_20.01 transported compounds (substrates)_20.01.25 vitamine/cofactor transport_20.09 transport routes_20.09.18 cellular import_20.09.18.07 non-vesicular cellular import_70 SUBCELLULAR LOCALIZATION_70.02 eukaryotic plasma membrane / membrane attached	;Sugar_tr;MFS_1;DUF81;Brevenin;	Non-secretory protein	E_Evol	B_Evol	B_Evol		0
7nc529_050	NCU02239	NCU02239	NCU02239	hypothetical protein	99 UNCLASSIFIED PROTEINS	NULL	Non-secretory protein	N_Evol	N_Evol	N_Evol		0
7nc529_060	NCU02240	NCU02240	NCU02240	related to endoglucanase B	01 METABOLISM_01.05 C-compound and carbohydrate metabolism_01.05.03 polysaccharide metabolism	;Glyco_hydro_61;CBM_1;	Signal peptide	E_Evol	B_Evol	B_Evol		0
7nc529_070	NCU02241	NCU02241	NCU02241	hypothetical protein	99 UNCLASSIFIED PROTEINS	;Nha1_C;HPC2;SPT2;	Non-secretory protein	F_Evol	F_Evol	F_Evol		0
7nc529_080	NCU02242	NCU02242	NCU02242	conserved hypothetical protein	99 UNCLASSIFIED PROTEINS	;zf-C3HC4;zf-MIZ;	Non-secretory protein	F_Evol	F_Evol	F_Evol		0
7nc529_090	NCU02243	NCU02243	NCU02243	hypothetical protein	99 UNCLASSIFIED PROTEINS	;Merozoite_SPAM;IncA;MAP7;Vicilin_N;	Non-secretory protein	N_Evol	N_Evol	N_Evol		0
7nc529_100	NCU02244	NCU02244	NCU02244	hypothetical protein	99 UNCLASSIFIED PROTEINS	;C2;	Non-secretory protein	B_Evol	B_Evol	B_Evol		0
7nc529_110	NCU02245	NCU02245	NCU02245	related to serine/threonine-specific protein kinase	14 PROTEIN FATE (folding, modification, destination)_14.07 protein modification_14.07.03 modification by phosphorylation, dephosphorylation, autophosphorylation_30 CELLULAR COMMUNICATION/SIGNAL TRANSDUCTION MECHANISM_30.01 cellular signalling_30.01.05 enzyme mediated signal transduction	;Pkinase;Pkinase_Tyr;APH;RIO1;GRP;	Non-secretory protein	F_Evol	F_Evol	F_Evol		0
b13d24_350	NCU02249	NCU02249	NCU02249	related to histone acetyltransferase	10 CELL CYCLE AND DNA PROCESSING_10.01 DNA processing_10.01.09 DNA restriction or modification_10.01.09.05 DNA conformation modification (e.g. chromatin)_14 PROTEIN FATE (folding, modification, destination)_14.07 protein modification_14.07.04 modification by acetylation, deacetylation_70 SUBCELLULAR LOCALIZATION_70.10 nucleus_70.10.03 chromosome	;Extensin_2;zf-C2H2;MOZ_SAS;	Non-secretory protein	F_Evol	F_Evol	F_Evol		0
b13d24_340	NCU02250	NCU02250	NCU02250	H+-transporting two-sector ATPase lipid-binding protein precursor	02 ENERGY_02.11 electron transport and membrane-associated energy conservation_02.13 respiration_02.45 energy conversion and regeneration_02.45.15 energy generation (e.g. ATP synthase)_20 CELLULAR TRANSPORT, TRANSPORT FACILITIES AND TRANSPORT ROUTES_20.03 transport facilities_20.03.22 transport ATPases_34 INTERACTION WITH THE ENVIRONMENT_34.01 homeostasis_34.01.01 homeostasis of cations_34.01.01.…	;ATP-synt_C;	Signal peptide	E_Evol	E_Evol	O_Evol		0
b13d24_330	NCU02251	NCU02251	NCU02251	hypothetical protein	99 UNCLASSIFIED PROTEINS	NULL	Non-secretory protein	O_Evol	N_Evol	N_Evol		0
b13d24_320	NCU02252	NCU02252	NCU02252	probable phosphoglyceromutase	01 METABOLISM_01.05 C-compound and carbohydrate metabolism_02 ENERGY_02.01 glycolysis and gluconeogenesis	;iPGM_N;Metalloenzyme;	Non-secretory protein	E_Evol	E_Evol	E_Evol		0
b13d24_300	NCU02254	NCU02254	NCU02254	related to tubulin folding cofactor C	10 CELL CYCLE AND DNA PROCESSING_10.03 cell cycle_10.03.03 cytokinesis (cell division) /septum formation and hydrolysis	;TBCC;	Non-secretory protein	O_Evol	F_Evol	F_Evol		0
b13d24_290	NCU02255	NCU02255	NCU02255	related to N-acetylglucosaminyl-phosphatidylinositol biosynthetic protein gpi1	01 METABOLISM_01.06 lipid, fatty acid and isoprenoid metabolism	;UPF0203;Gpi1;	Non-secretory protein	B_Evol	A_Evol	F_Evol		0
b13d24_270	NCU02256	NCU02256	NCU02256	related to nucleolar 100K polymyositis-scleroderma protein	70 SUBCELLULAR LOCALIZATION_70.10 nucleus_98 CLASSIFICATION NOT YET CLEAR-CUT	;PMC2NT;3_5_exonuc;HRDC;eIF3_subunit;	Non-secretory protein	E_Evol	E_Evol	A_Evol		0
b13d24_260	NCU02257	NCU02257	NCU02257	related to protein tyrosine phosphatase phi	14 PROTEIN FATE (folding, modification, destination)_14.07 protein modification_14.07.03 modification by phosphorylation, dephosphorylation, autophosphorylation_30 CELLULAR COMMUNICATION/SIGNAL TRANSDUCTION MECHANISM_30.01 cellular signalling	;Y_phosphatase;	Non-secretory protein	F_Evol	F_Evol	F_Evol		0
b13d24_230	NCU02259	NCU02259	NCU02259	putative protein	99 UNCLASSIFIED PROTEINS	NULL	Non-secretory protein	F_Evol	F_Evol	F_Evol		0
b13d24_220	NCU02260	NCU02260	NCU02260	probable 26S proteasome regulatory particle chain RPT3	14 PROTEIN FATE (folding, modification, destination)_14.13 protein/peptide degradation_14.13.01 cytoplasmic and nuclear protein degradation_14.13.01.01 proteasomal degradation (ubiquitin/proteasomal pathway)	;UPF0079;AAA_2;MMR_HSR1;AAA;AAA_3;AAA_5;	Non-secretory protein	E_Evol	E_Evol	E_Evol		0
b13d24_210	NCU02261	NCU02261	NCU02261	hypothetical protein	99 UNCLASSIFIED PROTEINS	NULL	Non-secretory protein	F_Evol	F_Evol	F_Evol		0
b13d24_200	NCU02262	NCU02262	NCU02262	hypothetical protein	99 UNCLASSIFIED PROTEINS	;Mis14;	Non-secretory protein	F_Evol	F_Evol	F_Evol		0
b13d24_190	NCU02263	NCU02263	NCU02263	probable phosphatidylinositol/phosphatidylcholine transfer protein SEC14	20 CELLULAR TRANSPORT, TRANSPORT FACILITIES AND TRANSPORT ROUTES_20.01 transported compounds (substrates)_20.01.13 lipid/fatty acid transport_20.09 transport routes_20.09.07 vesicular transport (Golgi network, etc.)	;CRAL_TRIO_N;CRAL_TRIO;	Non-secretory protein	E_Evol	E_Evol	E_Evol		0
b13d24_180	NCU02264	NCU02264	NCU02264	related to prefoldin subunit 3	14 PROTEIN FATE (folding, modification, destination)_14.01 protein folding and stabilization_16 PROTEIN WITH BINDING FUNCTION OR COFACTOR REQUIREMENT (structural or catalytic)_16.01 protein binding	;Prefoldin;Prefoldin_2;	Non-secretory protein	E_Evol	E_Evol	E_Evol		0
b13d24_170	NCU02265	NCU02265	NCU02265	period clock protein FRQ FRQ	34 INTERACTION WITH THE ENVIRONMENT_34.11 cellular sensing and response to external stimulus_34.11.11 rhythm (e.g. circadian, ultradian)	;TP2;	Non-secretory protein	F_Evol	F_Evol	F_Evol		0
b13d24_160	NCU02266	NCU02266	NCU02266	hypothetical protein	99 UNCLASSIFIED PROTEINS	NULL	Signal peptide	N_Evol	N_Evol	N_Evol		0
b13d24_150	NCU02267	NCU02267	NCU02267	conserved hypothetical protein	99 UNCLASSIFIED PROTEINS	;RCC1;	Non-secretory protein	B_Evol	F_Evol	F_Evol		0
b13d24_140	NCU02268	NCU02268	NCU02268	related to conserved oligomeric Golgi complex component 3	20 CELLULAR TRANSPORT, TRANSPORT FACILITIES AND TRANSPORT ROUTES_20.09 transport routes_20.09.07 vesicular transport (Golgi network, etc.)_42 BIOGENESIS OF CELLULAR COMPONENTS_42.08 Golgi_70 SUBCELLULAR LOCALIZATION_70.08 Golgi	;Sec34;	Non-secretory protein	F_Evol	F_Evol	F_Evol		0
b13d24_130	NCU02269	NCU02269	NCU02269	related to carrier protein YMC1, mitochondrial	20 CELLULAR TRANSPORT, TRANSPORT FACILITIES AND TRANSPORT ROUTES_20.09 transport routes_20.09.04 mitochondrial transport_70 SUBCELLULAR LOCALIZATION_70.16 mitochondrion	;Mito_carr;Mito_carr;Mito_carr;	Non-secretory protein	E_Evol	E_Evol	E_Evol		0
b13d24_120	NCU02270	NCU02270	NCU02270	related to Rad50-interacting protein 1	10 CELL CYCLE AND DNA PROCESSING_10.03 cell cycle_10.03.01 mitotic cell cycle and cell cycle control_16 PROTEIN WITH BINDING FUNCTION OR COFACTOR REQUIREMENT (structural or catalytic)_16.01 protein binding	;H-kinase_dim;Vps53_N;Tropomyosin;RINT1_TIP1;	Non-secretory protein	B_Evol	F_Evol	F_Evol		0
b13d24_110	NCU02271	NCU02271	NCU02271	conserved hypothetical protein	99 UNCLASSIFIED PROTEINS	;DUF155;	Signal peptide	E_Evol	F_Evol	F_Evol		0
b13d24_100	NCU02272	NCU02272	NCU02272	hypothetical protein	99 UNCLASSIFIED PROTEINS	;DUF1210;Extensin_2;	Non-secretory protein	F_Evol	F_Evol	F_Evol		0
b13d24_090	NCU02273	NCU02273	NCU02273	aspartic proteinase, pepstatin-sensitive PEP-4	14 PROTEIN FATE (folding, modification, destination)_14.13 protein/peptide degradation_14.13.04 lysosomal and vacuolar protein degradation_70 SUBCELLULAR LOCALIZATION_70.25 vacuole or lysosome	;Asp;	Signal peptide	E_Evol	E_Evol	E_Evol		0
b13d24_080	NCU02274	NCU02274	NCU02274	glycine hydroxymethyltransferase, cytosolic	01 METABOLISM_01.01 amino acid metabolism_01.03 nucleotide/nucleoside/nucleobase metabolism_01.03.01 purin nucleotide/nucleoside/nucleobase metabolism_01.05 C-compound and carbohydrate metabolism_01.05.05 C-1 compound metabolism_01.05.05.04 C-1 compound anabolism_01.05.05.07 C-1 compound catabolism_01.06 lipid, fatty acid and isoprenoid metabolism_70 SUBCELLULAR LOCALIZATION_70.03 cytoplasm	;SHMT;Pyridoxal_deC;Aminotran_1_2;Beta_elim_lyase;Aminotran_5;	Non-secretory protein	E_Evol	E_Evol	E_Evol		0
b13d24_070	NCU02275	NCU02275	NCU02275	hypothetical protein	99 UNCLASSIFIED PROTEINS	NULL	Non-secretory protein	N_Evol	N_Evol	N_Evol		0
b13d24_060	NCU02276	NCU02276	NCU02276	related to transcription regulator SPT7	11 TRANSCRIPTION_11.02 RNA synthesis_11.02.03 mRNA synthesis_11.02.03.04 transcriptional control_70 SUBCELLULAR LOCALIZATION_70.10 nucleus	;Bromodomain;Bromo_TP;	Non-secretory protein	F_Evol	F_Evol	F_Evol		0
b13d24_050	NCU02277	NCU02277	NCU02277	conserved hypothetical protein	99 UNCLASSIFIED PROTEINS	;VanZ;	Signal peptide	B_Evol	F_Evol	F_Evol		0
b13d24_040	NCU02278	NCU02278	NCU02278	related to ferric reductase	16 PROTEIN WITH BINDING FUNCTION OR COFACTOR REQUIREMENT (structural or catalytic)_16.17 metal binding_16.17.09 heavy metal binding (Cu, Fe, Zn)_20 CELLULAR TRANSPORT, TRANSPORT FACILITIES AND TRANSPORT ROUTES_20.09 transport routes_20.09.18 cellular import_20.09.18.07 non-vesicular cellular import_34 INTERACTION WITH THE ENVIRONMENT_34.01 homeostasis_34.01.01 homeostasis of cations_34.01.01.01 h…	;Ferric_reduct;FAD_binding_8;NAD_binding_6;NAD_binding_1;	Non-secretory protein	F_Evol	F_Evol	F_Evol		0
b13d24_010	NCU02280	NCU02280	NCU02280	NADH2 dehydrogenase (ubiquinone) 21.3K chain	02 ENERGY_02.11 electron transport and membrane-associated energy conservation_02.13 respiration_70 SUBCELLULAR LOCALIZATION_70.16 mitochondrion	;Tim17;	Non-secretory protein	F_Evol	F_Evol	F_Evol		0
5l23_010	NCU02282	NCU02282	NCU02282	probable aureobasidin-resistance protein	01 METABOLISM_01.06 lipid, fatty acid and isoprenoid metabolism_32 CELL RESCUE, DEFENSE AND VIRULENCE_32.05 disease, virulence and defense_32.05.01 resistance proteins_32.05.01.01 antibiotic resistance	;PAP2;	Non-secretory protein	B_Evol	B_Evol	A_Evol		0
5l23_020	NCU02283	NCU02283	NCU02283	probable calmodulin-dependent protein kinase	14 PROTEIN FATE (folding, modification, destination)_14.07 protein modification_14.07.03 modification by phosphorylation, dephosphorylation, autophosphorylation_30 CELLULAR COMMUNICATION/SIGNAL TRANSDUCTION MECHANISM_30.01 cellular signalling_30.01.09 second messenger mediated signal transduction_30.01.09.03 Ca2+ mediated signal transduction	;Pkinase;Pkinase_Tyr;	Non-secretory protein	E_Evol	E_Evol	E_Evol		0
5l23_050	NCU02286	NCU02286	NCU02286	related to RNA-binding protein	16 PROTEIN WITH BINDING FUNCTION OR COFACTOR REQUIREMENT (structural or catalytic)_16.03 nucleic acid binding_16.03.03 RNA binding	;Atrophin-1;Extensin_2;RRM_1;DUF1777;Drf_FH1;	Non-secretory protein	F_Evol	F_Evol	F_Evol		0
5l23_060	NCU02287	NCU02287	NCU02287	probable acyl-CoA dehydrogenase	01 METABOLISM_01.06 lipid, fatty acid and isoprenoid metabolism	;Cyt-b5;Acyl-CoA_dh_N;Acyl-CoA_dh_M;Acyl-CoA_dh_1;Acyl-CoA_dh_2;	Non-secretory protein	E_Evol	E_Evol	E_Evol		0
5l23_090	NCU02289	NCU02289	NCU02289	probable ubiquitin conjugating enzyme ubc1	14 PROTEIN FATE (folding, modification, destination)_14.07 protein modification_14.07.05 modification by ubiquitination, deubiquitination_14.13 protein/peptide degradation	;UQ_con;UEV;	Non-secretory protein	E_Evol	E_Evol	E_Evol		0
5l23_100	NCU02291	NCU02291	NCU02291	probable glutaryl-CoA dehydrogenase	01 METABOLISM_01.06 lipid, fatty acid and isoprenoid metabolism	;Acyl-CoA_dh_N;Acyl-CoA_dh_M;Acyl-CoA_dh_1;Acyl-CoA_dh_2;	Non-secretory protein	E_Evol	E_Evol	E_Evol		0
5l23_110	NCU02292	NCU02292	NCU02292	hypothetical protein	99 UNCLASSIFIED PROTEINS	;HPC2;	Non-secretory protein	N_Evol	N_Evol	N_Evol		0
5l23_120	NCU02293	NCU02293	NCU02293	conserved hypothetical protein	99 UNCLASSIFIED PROTEINS	NULL	Non-secretory protein	E_Evol	B_Evol	F_Evol		0
5l23_130	NCU02294	NCU02294	NCU02294	related to multi copy suppressor SYS1	20 CELLULAR TRANSPORT, TRANSPORT FACILITIES AND TRANSPORT ROUTES_20.09 transport routes_20.09.07 vesicular transport (Golgi network, etc.)	;GRP;	Signal anchor	O_Evol	F_Evol	F_Evol		0
5l23_140	NCU02295	NCU02295	NCU02295	related to phosphatidylinositol-4-phosphate 5-kinase	01 METABOLISM_01.06 lipid, fatty acid and isoprenoid metabolism	;PIP5K;	Non-secretory protein	B_Evol	B_Evol	F_Evol		0
5l23_150	NCU02296	NCU02296	NCU02296	related to allantoinase	01 METABOLISM_01.02 nitrogen, sulfur and selenium metabolism_01.03 nucleotide/nucleoside/nucleobase metabolism_01.03.01 purin nucleotide/nucleoside/nucleobase metabolism	;Amidohydro_1;Amidohydro_3;Rop;	Non-secretory protein	E_Evol	E_Evol	E_Evol		0
5l23_170	NCU02298	NCU02298	NCU02298	hypothetical protein	99 UNCLASSIFIED PROTEINS	NULL	Non-secretory protein	N_Evol	N_Evol	N_Evol		0
5l23_180	NCU02299	NCU02299	NCU02299	probable endo-polygalacturonase 6	01 METABOLISM_01.05 C-compound and carbohydrate metabolism_01.05.03 polysaccharide metabolism_42 BIOGENESIS OF CELLULAR COMPONENTS_42.01 cell wall	;ADH_zinc_N;	Non-secretory protein	E_Evol	E_Evol	E_Evol		0
5l23_190	NCU02300	NCU02300	NCU02300	hypothetical protein	99 UNCLASSIFIED PROTEINS	NULL	Non-secretory protein	N_Evol	N_Evol	N_Evol		0
5l23_200	NCU02301	NCU02301	NCU02301	hypothetical protein	99 UNCLASSIFIED PROTEINS	NULL	Non-secretory protein	N_Evol	N_Evol	N_Evol		0
5l23_210	NCU02302	NCU02302	NCU02302	conserved hypothetical protein	99 UNCLASSIFIED PROTEINS	;PS_Dcarbxylase;PTS_EIIA_1;	Non-secretory protein	E_Evol	E_Evol	E_Evol		0
5l23_220	NCU02303	NCU02303	NCU02303	hypothetical protein	99 UNCLASSIFIED PROTEINS	NULL	Non-secretory protein	F_Evol	F_Evol	N_Evol		0
5l23_230	NCU02304	NCU02304	NCU02304	hypothetical protein	99 UNCLASSIFIED PROTEINS	NULL	Non-secretory protein	F_Evol	F_Evol	F_Evol		0
5l23_240	NCU02305	NCU02305	NCU02305	probable prenyl transferase	01 METABOLISM_01.20 secondary metabolism_01.20.15 metabolism of derivatives of dehydroquinic acid, shikimic acid and chorismic acid_01.20.15.03 metabolism of ubiquinone	;polyprenyl_synt;	Non-secretory protein	E_Evol	E_Evol	E_Evol		0
5l23_250	NCU02307	NCU02307	NCU02307	putative protein	99 UNCLASSIFIED PROTEINS	;AT_hook;Zn_clus;	Non-secretory protein	F_Evol	F_Evol	F_Evol		0
5l23_260	NCU02308	NCU02308	NCU02308	hypothetical protein	99 UNCLASSIFIED PROTEINS	NULL	Non-secretory protein	N_Evol	N_Evol	N_Evol		0
5l23_270	NCU02309	NCU02309	NCU02309	hypothetical protein	99 UNCLASSIFIED PROTEINS	NULL	Non-secretory protein	N_Evol	N_Evol	N_Evol		0
7nc527_010	NCU02310	NCU02310	NCU02310	putative protein	99 UNCLASSIFIED PROTEINS	;Condensation;ATP_bind_1;	Non-secretory protein	E_Evol	E_Evol	O_Evol		0
7nc527_020	NCU02311	NCU02311	NCU02311	hypothetical protein	99 UNCLASSIFIED PROTEINS	;Mucin;	Non-secretory protein	N_Evol	N_Evol	N_Evol		0
7nc527_030	NCU02312	NCU02312	NCU02312	hypothetical protein	99 UNCLASSIFIED PROTEINS	NULL	Non-secretory protein	N_Evol	N_Evol	N_Evol		0
7nc527_040	NCU02314	NCU02314	NCU02314	hypothetical protein	99 UNCLASSIFIED PROTEINS	;Extensin_2;	Non-secretory protein	N_Evol	N_Evol	N_Evol		0
[truncated: 7,379 more rows]

## Sheet: 25% SIMAP
MIPS ID	MIPS_09	CHG	Euk/Prok	Basidio	Asco	Pezizo	SUM	LS group	NC_CHG	NC_SC	NC_PhC	NC_DM	NC_AT
[truncated: 9,127 more rows]

[truncated: 2 more sheets: 30% SIMAP, 35% SIMAP]
