# Supplementary material for: Relationship between Phylogenetic Distribution and Genomic Features in Neurospora crassa
Source: PLoS One. 2009 Apr 21;4(4):e5286. doi: 10.1371/journal.pone.0005286 (PMC2684829; doi:10.1371/journal.pone.0005286)
Supplement: Table S2 — Enrichment analysis of FunCat categories in LS groups. For each FunCat category, a statistical significance according to Fisher's exact test is indicated if multiple hypotheses corrected p<0.05. (0.17 MB XLS) [file pone.0005286.s002.xls]

## Sheet: S2
Supplementary Table S2. Enrichment analysis of FunCat categories in LS groups
Enriched FunCat categories	Observed or expecteda	N. crassa-orphans	Pezizo-specific	Ascomycota-specific	Dikarya-core	Euk/Prok-core	Others	Totalb
01 METABOLISM	Obs	23^^^	216^^^	16	210^^^	702^^^	61^^^	1228
	Exp	298.557	429.739	19.5091	138.044	317.259	24.891
01.01 amino acid metabolism	Obs	2^^^	16^^^	2	21	140^^^	7	188
	Exp	45.7075	65.7907	2.98674	21.1338	48.5706	3.81067
01.01.03 assimilation of ammonia, metabolism of the glutamate group	Obs	0^^	0^^^	0	3	21^^^	1	25
	Exp	6.07812	8.74877	0.397173	2.81034	6.45886	0.506738
01.01.03.01 metabolism of glutamine	Obs	0	0	0	0	5	0	5
	Exp	1.21562	1.74975	0.0794346	0.562069	1.29177	0.101348
01.01.03.01.01 biosynthesis of glutamine	Obs	0	0	0	0	4	0	4
	Exp	0.972499	1.3998	0.0635477	0.449655	1.03342	0.0810781
01.01.03.01.02 degradation of glutamine	Obs	0	0	0	0	3	0	3
	Exp	0.729374	1.04985	0.0476608	0.337241	0.775063	0.0608086
01.01.03.02 metabolism of glutamate	Obs	0	0^	0	1	11^^^	0	12
	Exp	2.9175	4.19941	0.190643	1.34896	3.10025	0.243234
01.01.03.02.01 biosynthesis of glutamate	Obs	0	0	0	0	7	0	7
	Exp	1.70187	2.44965	0.111209	0.786896	1.80848	0.141887
01.01.03.02.02 degradation of glutamate	Obs	0	0	0	1	5	0	6
	Exp	1.45875	2.0997	0.0953216	0.674482	1.55013	0.121617
01.01.03.03 metabolism of proline	Obs	0	0	0	0	5	0	5
	Exp	1.21562	1.74975	0.0794346	0.562069	1.29177	0.101348
01.01.03.03.01 biosynthesis of proline	Obs	0	0	0	0	4	0	4
	Exp	0.972499	1.3998	0.0635477	0.449655	1.03342	0.0810781
01.01.03.03.02 degradation of proline	Obs	0	0	0	0	2	0	2
	Exp	0.48625	0.699901	0.0317739	0.224827	0.516709	0.0405391
01.01.03.05 metabolism of arginine	Obs	0	0	0	1	6^	1	8
	Exp	1.945	2.79961	0.127095	0.89931	2.06683	0.162156
01.01.03.05.01 biosynthesis of arginine	Obs	0	0	0	1	4	1	6
	Exp	1.45875	2.0997	0.0953216	0.674482	1.55013	0.121617
01.01.03.05.02 degradation of arginine	Obs	0	0	0	0	4	0	4
	Exp	0.972499	1.3998	0.0635477	0.449655	1.03342	0.0810781
01.01.05 metabolism of urea cycle, creatine and polyamines	Obs	0	0	0	0	8^^^	1	9
	Exp	2.18812	3.14956	0.142982	1.01172	2.32519	0.182426
01.01.05.01 metabolism of polyamines	Obs	0	0	0	0	3	1	4
	Exp	0.972499	1.3998	0.0635477	0.449655	1.03342	0.0810781
01.01.05.01.01 biosynthesis of polyamines	Obs	0	0	0	0	3	1	4
	Exp	0.972499	1.3998	0.0635477	0.449655	1.03342	0.0810781
01.01.05.03 metabolism of urea (urea cycle)	Obs	0	0	0	0	2	0	2
	Exp	0.48625	0.699901	0.0317739	0.224827	0.516709	0.0405391
01.01.06 metabolism of the aspartate family	Obs	0^	1^^	0	2	19^^^	1	23
	Exp	5.59187	8.04887	0.365399	2.58552	5.94215	0.466199
01.01.06.01 metabolism of aspartate	Obs	0	0	0	0	2	0	2
	Exp	0.48625	0.699901	0.0317739	0.224827	0.516709	0.0405391
01.01.06.01.01 biosynthesis of aspartate	Obs	0	0	0	0	2	0	2
	Exp	0.48625	0.699901	0.0317739	0.224827	0.516709	0.0405391
01.01.06.01.02 degradation of aspartate	Obs	0	0	0	0	1	0	1
	Exp	0.243125	0.349951	0.0158869	0.112414	0.258354	0.0202695
01.01.06.02 metabolism of asparagine	Obs	0	0	0	0	1	0	1
	Exp	0.243125	0.349951	0.0158869	0.112414	0.258354	0.0202695
01.01.06.02.02 degradation of asparagine	Obs	0	0	0	0	1	0	1
	Exp	0.243125	0.349951	0.0158869	0.112414	0.258354	0.0202695
01.01.06.04 metabolism of threonine	Obs	0	0	0	1	2	0	3
	Exp	0.729374	1.04985	0.0476608	0.337241	0.775063	0.0608086
01.01.06.04.01 biosynthesis of threonine	Obs	0	0	0	1	2	0	3
	Exp	0.729374	1.04985	0.0476608	0.337241	0.775063	0.0608086
01.01.06.04.02 degradation of threonine	Obs	0	0	0	1	1	0	2
	Exp	0.48625	0.699901	0.0317739	0.224827	0.516709	0.0405391
01.01.06.05 metabolism of methionine	Obs	0	0	0	1	6	0	7
	Exp	1.70187	2.44965	0.111209	0.786896	1.80848	0.141887
01.01.06.05.01 biosynthesis of methionine	Obs	0	0	0	0	4	0	4
	Exp	0.972499	1.3998	0.0635477	0.449655	1.03342	0.0810781
01.01.06.05.02 degradation of methionine	Obs	0	0	0	1	3	0	4
	Exp	0.972499	1.3998	0.0635477	0.449655	1.03342	0.0810781
01.01.06.06 metabolism of lysine	Obs	0	0	0	1	8^^	1	10
	Exp	2.43125	3.49951	0.158869	1.12414	2.58354	0.202695
01.01.06.06.01 biosynthesis of lysine	Obs	0	0	0	1	7^^	0	8
	Exp	1.945	2.79961	0.127095	0.89931	2.06683	0.162156
01.01.06.06.02 degradation of lysine	Obs	0	0	0	0	3	1	4
	Exp	0.972499	1.3998	0.0635477	0.449655	1.03342	0.0810781
01.01.09 metabolism of the cysteine - aromatic group	Obs	1^^^	3^^^	1	7	38^^^	4	54
	Exp	13.1287	18.8973	0.857894	6.07034	13.9511	1.09455
01.01.09.01 metabolism of glycine	Obs	0	0	0	1	7^	2	10
	Exp	2.43125	3.49951	0.158869	1.12414	2.58354	0.202695
01.01.09.01.01 biosynthesis of glycine	Obs	0	0	0	0	5	2	7
	Exp	1.70187	2.44965	0.111209	0.786896	1.80848	0.141887
01.01.09.01.02 degradation of glycine	Obs	0	0	0	1	5	0	6
	Exp	1.45875	2.0997	0.0953216	0.674482	1.55013	0.121617
01.01.09.02 metabolism of serine	Obs	0	0	0	1	5	0	6
	Exp	1.45875	2.0997	0.0953216	0.674482	1.55013	0.121617
01.01.09.02.01 biosynthesis of serine	Obs	0	0	0	1	4	0	5
	Exp	1.21562	1.74975	0.0794346	0.562069	1.29177	0.101348
01.01.09.02.02 degradation of serine	Obs	0	0	0	1	3	0	4
	Exp	0.972499	1.3998	0.0635477	0.449655	1.03342	0.0810781
01.01.09.03 metabolism of cysteine	Obs	0	0	0	0	4	1	5
	Exp	1.21562	1.74975	0.0794346	0.562069	1.29177	0.101348
01.01.09.03.01 biosynthesis of cysteine	Obs	0	0	0	0	4	0	4
	Exp	0.972499	1.3998	0.0635477	0.449655	1.03342	0.0810781
01.01.09.03.02 degradation of cysteine	Obs	0	0	0	0	1	1	2
	Exp	0.48625	0.699901	0.0317739	0.224827	0.516709	0.0405391
01.01.09.04 metabolism of phenylalanine	Obs	0	1	0	0	6^	1	8
	Exp	1.945	2.79961	0.127095	0.89931	2.06683	0.162156
01.01.09.04.01 biosynthesis of phenylalanine	Obs	0	1	0	0	6^	1	8
	Exp	1.945	2.79961	0.127095	0.89931	2.06683	0.162156
01.01.09.04.02 degradation of phenylalanine	Obs	0	0	0	0	5	1	6
	Exp	1.45875	2.0997	0.0953216	0.674482	1.55013	0.121617
01.01.09.05 metabolism of tyrosine	Obs	1	1	0	2	4	1	9
	Exp	2.18812	3.14956	0.142982	1.01172	2.32519	0.182426
01.01.09.05.01 biosynthesis of tyrosine	Obs	0	0	0	0	2	0	2
	Exp	0.48625	0.699901	0.0317739	0.224827	0.516709	0.0405391
01.01.09.05.02 degradation of tyrosine	Obs	1	1	0	1	3	1	7
	Exp	1.70187	2.44965	0.111209	0.786896	1.80848	0.141887
01.01.09.06 metabolism of tryptophan	Obs	0	0^	1	2	8^	1	12
	Exp	2.9175	4.19941	0.190643	1.34896	3.10025	0.243234
01.01.09.06.01 biosynthesis of tryptophan	Obs	0	0	0	1	4	0	5
	Exp	1.21562	1.74975	0.0794346	0.562069	1.29177	0.101348
01.01.09.06.02 degradation of tryptophan	Obs	0	0	1	1	5	1	8
	Exp	1.945	2.79961	0.127095	0.89931	2.06683	0.162156
01.01.09.07 metabolism of histidine	Obs	0	0	0	0	8^^^	0	8
	Exp	1.945	2.79961	0.127095	0.89931	2.06683	0.162156
01.01.09.07.01 biosynthesis of histidine	Obs	0	0	0	0	8^^^	0	8
	Exp	1.945	2.79961	0.127095	0.89931	2.06683	0.162156
01.01.11 metabolism of the pyruvate family (alanine, isoleucine, leucine, valine) and D-alanine	Obs	0^	1^	0	2	16^^^	0	19
	Exp	4.61937	6.64906	0.301852	2.13586	4.90873	0.385121
01.01.11.01 metabolism of alanine	Obs	0	0	0	0	1	0	1
	Exp	0.243125	0.349951	0.0158869	0.112414	0.258354	0.0202695
01.01.11.02 metabolism of isoleucine	Obs	0	0	0	0	8^^^	0	8
	Exp	1.945	2.79961	0.127095	0.89931	2.06683	0.162156
01.01.11.02.01 biosynthesis of isoleucine	Obs	0	0	0	0	6	0	6
	Exp	1.45875	2.0997	0.0953216	0.674482	1.55013	0.121617
01.01.11.02.02 degradation of isoleucine	Obs	0	0	0	0	3	0	3
	Exp	0.729374	1.04985	0.0476608	0.337241	0.775063	0.0608086
01.01.11.03 metabolism of valine	Obs	0	1	0	0	8^^^	0	9
	Exp	2.18812	3.14956	0.142982	1.01172	2.32519	0.182426
01.01.11.03.01 biosynthesis of valine	Obs	0	0	0	0	5	0	5
	Exp	1.21562	1.74975	0.0794346	0.562069	1.29177	0.101348
01.01.11.03.02 degradation of valine	Obs	0	1	0	0	4	0	5
	Exp	1.21562	1.74975	0.0794346	0.562069	1.29177	0.101348
01.01.11.04 metabolism of leucine	Obs	0	0	0	0	9^^^	0	9
	Exp	2.18812	3.14956	0.142982	1.01172	2.32519	0.182426
01.01.11.04.01 biosynthesis of leucine	Obs	0	0	0	0	5	0	5
	Exp	1.21562	1.74975	0.0794346	0.562069	1.29177	0.101348
01.01.11.04.02 degradation of leucine	Obs	0	0	0	0	5	0	5
	Exp	1.21562	1.74975	0.0794346	0.562069	1.29177	0.101348
01.01.13 regulation of amino acid metabolism	Obs	0	7	1	1	3	0	12
	Exp	2.9175	4.19941	0.190643	1.34896	3.10025	0.243234
01.02 nitrogen, sulfur and selenium metabolism	Obs	0^^^	13^^	1	14	41^^^	7^^	76
	Exp	18.4775	26.5963	1.20741	8.54344	19.6349	1.54048
01.02.02 nitrogen metabolism	Obs	0	1	0	1	4	1	7
	Exp	1.70187	2.44965	0.111209	0.786896	1.80848	0.141887
01.02.02.06 assimilation of ammonia	Obs	0	1	0	0	0	0	1
	Exp	0.243125	0.349951	0.0158869	0.112414	0.258354	0.0202695
01.02.02.09 catabolism of nitrogenous compounds	Obs	0	0	0	1	4	1	6
	Exp	1.45875	2.0997	0.0953216	0.674482	1.55013	0.121617
01.02.02.09.01 urea catabolism (not urea cycle)	Obs	0	0	0	1	0	0	1
	Exp	0.243125	0.349951	0.0158869	0.112414	0.258354	0.0202695
01.02.03 sulfur metabolism	Obs	0	1	0	0	0	0	1
	Exp	0.243125	0.349951	0.0158869	0.112414	0.258354	0.0202695
01.02.03.01 sulfate assimilation	Obs	0	1	0	0	0	0	1
	Exp	0.243125	0.349951	0.0158869	0.112414	0.258354	0.0202695
01.02.07 regulation of nitrogen, sulfur and selenium metabolism	Obs	0	10	0	2	4	0	16
	Exp	3.89	5.59921	0.254191	1.79862	4.13367	0.324312
01.02.07.01 regulation of nitrogen metabolism	Obs	0	2	0	0	0	0	2
	Exp	0.48625	0.699901	0.0317739	0.224827	0.516709	0.0405391
01.02.07.03 regulation of sulphur metabolism	Obs	0	0	0	1	1	0	2
	Exp	0.48625	0.699901	0.0317739	0.224827	0.516709	0.0405391
01.03 nucleotide/nucleoside/nucleobase metabolism	Obs	2^^^	10^^^	2	10	68^^^	0	92
	Exp	22.3675	32.1955	1.4616	10.3421	23.7686	1.8648
01.03.01 purin nucleotide/nucleoside/nucleobase metabolism	Obs	0^^^	4^^	1	0	35^^^	0	40
	Exp	9.72499	13.998	0.635477	4.49655	10.3342	0.810781
01.03.01.01 purine nucleotide /nucleoside/nucleobase catabolism	Obs	0	0	0	0	1	0	1
	Exp	0.243125	0.349951	0.0158869	0.112414	0.258354	0.0202695
01.03.01.03 purine nucleotide/nucleoside/nucleobase anabolism	Obs	0	0	0	0	4	0	4
	Exp	0.972499	1.3998	0.0635477	0.449655	1.03342	0.0810781
01.03.04 pyrimidine nucleotide/nucleoside/nucleobase metabolism	Obs	0^^	1^^^	0	3	23^^^	0	27
	Exp	6.56437	9.44867	0.428947	3.03517	6.97557	0.547277
01.03.04.03 pyrimidine nucleotide/nucleoside/nucleobase anabolism	Obs	0	0	0	0	1	0	1
	Exp	0.243125	0.349951	0.0158869	0.112414	0.258354	0.0202695
01.03.07 deoxyribonucleotide metabolism	Obs	0	0	0	0	2	0	2
	Exp	0.48625	0.699901	0.0317739	0.224827	0.516709	0.0405391
01.03.10 metabolism of cyclic and unusual nucleotides	Obs	1	1	0	2	1	0	5
	Exp	1.21562	1.74975	0.0794346	0.562069	1.29177	0.101348
01.03.13 regulation of nucleotide/nucleoside/nucleobase metabolism	Obs	0	2	0	0	0	0	2
	Exp	0.48625	0.699901	0.0317739	0.224827	0.516709	0.0405391
01.03.16 polynucleotide degradation	Obs	0^	2	1	4	11^^	0	18
	Exp	4.37625	6.29911	0.285965	2.02345	4.65038	0.364852
01.03.16.01 RNA degradation	Obs	0	1	1	3	2	0	7
	Exp	1.70187	2.44965	0.111209	0.786896	1.80848	0.141887
01.04 phosphate metabolism	Obs	0^^	5	3^	8^	10	0	26
	Exp	6.32124	9.09872	0.41306	2.92276	6.71721	0.527008
01.04.04 regulation of phosphate metabolism	Obs	0	3	3^^	2	1	0	9
	Exp	2.18812	3.14956	0.142982	1.01172	2.32519	0.182426
01.05 C-compound and carbohydrate metabolism	Obs	13^^^	103^^^	7	84^^^	257^^^	32^^^	496
	Exp	120.59	173.576	7.87992	55.7572	128.144	10.0537
01.05.02 sugar, glucoside, polyol and carboxylate metabolism	Obs	0^^	9	0	5	11	3	28
	Exp	6.80749	9.79862	0.444834	3.14758	7.23392	0.567547
01.05.02.04 sugar, glucoside, polyol and carboxylate anabolism	Obs	0	0	0	0	2	0	2
	Exp	0.48625	0.699901	0.0317739	0.224827	0.516709	0.0405391
01.05.02.07 sugar, glucoside, polyol and carboxylate catabolism	Obs	0^^	9	0	5	11	4^	29
	Exp	7.05062	10.1486	0.460721	3.26	7.49228	0.587816
01.05.03 polysaccharide metabolism	Obs	2^^^	29	1	29^^^	37	11^^^	109
	Exp	26.5006	38.1446	1.73168	12.2531	28.1606	2.20938
01.05.05 C-1 compound metabolism	Obs	0	0	0	0	1	0	1
	Exp	0.243125	0.349951	0.0158869	0.112414	0.258354	0.0202695
01.05.05.04 C-1 compound anabolism	Obs	0	0	0	0	1	0	1
	Exp	0.243125	0.349951	0.0158869	0.112414	0.258354	0.0202695
01.05.05.07 C-1 compound catabolism	Obs	0	0	0	0	1	0	1
	Exp	0.243125	0.349951	0.0158869	0.112414	0.258354	0.0202695
01.05.06 C-2 compound and organic acid metabolism	Obs	0	0	0	0	2	0	2
	Exp	0.48625	0.699901	0.0317739	0.224827	0.516709	0.0405391
01.05.06.07 C-2 compound and organic acid catabolism	Obs	0	0	0	0	2	0	2
	Exp	0.48625	0.699901	0.0317739	0.224827	0.516709	0.0405391
01.05.09 aminosaccharide metabolism	Obs	0	5	0	3	4	0	12
	Exp	2.9175	4.19941	0.190643	1.34896	3.10025	0.243234
01.05.09.04 aminosaccharide anabolism	Obs	0	3	0	2	2	0	7
	Exp	1.70187	2.44965	0.111209	0.786896	1.80848	0.141887
01.05.09.07 aminosaccharide catabolism	Obs	0	4	0	1	3	0	8
	Exp	1.945	2.79961	0.127095	0.89931	2.06683	0.162156
01.05.11 aromate metabolism	Obs	0^^	6	0	4	11	4^^	25
	Exp	6.07812	8.74877	0.397173	2.81034	6.45886	0.506738
01.05.11.04 aromate anabolism	Obs	0	1	0	0	1	0	2
	Exp	0.48625	0.699901	0.0317739	0.224827	0.516709	0.0405391
01.05.11.07 aromate catabolism	Obs	0^	6	0	4	10	4^^	24
	Exp	5.835	8.39882	0.381286	2.69793	6.2005	0.486469
01.05.11.07.01 aerobic aromate catabolism	Obs	0^	6	0	4	9	4^^	23
	Exp	5.59187	8.04887	0.365399	2.58552	5.94215	0.466199
01.05.11.07.02 anaerobic aromate catabolism	Obs	0	0	0	0	1	0	1
	Exp	0.243125	0.349951	0.0158869	0.112414	0.258354	0.0202695
01.05.11.07.01.03 meta-cleavage	Obs	0	0	0	0	0	0	0
	Exp	0	0	0	0	0	0
01.05.13 transfer of activated C-1 groups	Obs	0	1	0	0	0	0	1
	Exp	0.243125	0.349951	0.0158869	0.112414	0.258354	0.0202695
01.05.13.03 tetrahydrofolate-dependent C-1-transfer	Obs	0	1	0	0	0	0	1
	Exp	0.243125	0.349951	0.0158869	0.112414	0.258354	0.0202695
01.05.25 regulation of C-compound and carbohydrate metabolism	Obs	1^^^	17	3	7	15	1	44
	Exp	10.6975	15.3978	0.699025	4.9462	11.3676	0.891859
01.06 lipid, fatty acid and isoprenoid metabolism	Obs	4^^^	47^^^	4	56^^^	134^^^	8	253
	Exp	61.5106	88.5375	4.01939	28.4407	65.3636	5.12819
01.06.02 membrane lipid metabolism	Obs	0	4	0	4	6	1	15
	Exp	3.64687	5.24926	0.238304	1.68621	3.87531	0.304043
01.06.02.01 phospholipid metabolism	Obs	0	3	0	3	5	1	12
	Exp	2.9175	4.19941	0.190643	1.34896	3.10025	0.243234
01.06.02.02 glycolipid metabolism	Obs	0	2	0	1	2	0	5
	Exp	1.21562	1.74975	0.0794346	0.562069	1.29177	0.101348
01.06.05 fatty acid metabolism	Obs	0	3	0	0	8^^	0	11
	Exp	2.67437	3.84946	0.174756	1.23655	2.8419	0.222965
01.06.06 isoprenoid metabolism	Obs	0^	6	1	3	12^	0	22
	Exp	5.34875	7.69892	0.349512	2.4731	5.6838	0.44593
01.06.06.05 sesquiterpenes metabolism	Obs	0	2	0	0	0	0	2
	Exp	0.48625	0.699901	0.0317739	0.224827	0.516709	0.0405391
01.06.06.07 diterpenes metabolism	Obs	0	1	0	1	0	0	2
	Exp	0.48625	0.699901	0.0317739	0.224827	0.516709	0.0405391
01.06.06.11 tetracyclic and pentacyclic triterpenes (cholesterin, steroids and hopanoids) metabolism	Obs	0	3	0	1	6	0	10
	Exp	2.43125	3.49951	0.158869	1.12414	2.58354	0.202695
01.06.06.13 tetraterpenes (carotinoids) metabolism	Obs	0	0	0	1	1	0	2
	Exp	0.48625	0.699901	0.0317739	0.224827	0.516709	0.0405391
01.06.10 regulation of lipid, fatty acid and isoprenoid metabolism	Obs	0	0	1	5^^	2	0	8
	Exp	1.945	2.79961	0.127095	0.89931	2.06683	0.162156
01.07 metabolism of vitamins, cofactors, and prosthetic groups	Obs	0^^^	4^^^	1	9	53^^^	1	68
	Exp	16.5325	23.7966	1.08031	7.64413	17.5681	1.37833
01.07.01 biosynthesis of vitamins, cofactors, and prosthetic groups	Obs	0^^^	2^^^	1	5	45^^^	1	54
	Exp	13.1287	18.8973	0.857894	6.07034	13.9511	1.09455
01.07.03 catabolism of vitamins, cofactors, and prosthetic groups	Obs	0	0	0	0	3	0	3
	Exp	0.729374	1.04985	0.0476608	0.337241	0.775063	0.0608086
01.07.04 utilization of vitamins, cofactors, and prosthetic groups	Obs	0	0	0	1	1	0	2
	Exp	0.48625	0.699901	0.0317739	0.224827	0.516709	0.0405391
01.20 secondary metabolism	Obs	2^^^	30	0	19	56^^^	10^^^	117
	Exp	28.4456	40.9442	1.85877	13.1524	30.2275	2.37154
01.20.01 metabolism of primary metabolic sugar derivatives	Obs	0	0	0	0	3	0	3
	Exp	0.729374	1.04985	0.0476608	0.337241	0.775063	0.0608086
01.20.01.05 metabolism of sugar alcohols	Obs	0	0	0	0	1	0	1
	Exp	0.243125	0.349951	0.0158869	0.112414	0.258354	0.0202695
01.20.01.07 metabolism of glycosides	Obs	0	0	0	0	1	0	1
	Exp	0.243125	0.349951	0.0158869	0.112414	0.258354	0.0202695
01.20.01.09 metabolism of aminoglycoside antibiotics	Obs	0	0	0	0	1	0	1
	Exp	0.243125	0.349951	0.0158869	0.112414	0.258354	0.0202695
01.20.05 metabolism of acetic acid derivatives	Obs	0	4	0	1	1	2^	8
	Exp	1.945	2.79961	0.127095	0.89931	2.06683	0.162156
01.20.15.01 metabolism of naphthoquinone, anthraquinone	Obs	0	0	0	0	0	1	1
	Exp	0.243125	0.349951	0.0158869	0.112414	0.258354	0.0202695
01.20.05.03 metabolism of alkanes, alkenes, alkanals, alkanols	Obs	0	0	0	1	0	0	1
	Exp	0.243125	0.349951	0.0158869	0.112414	0.258354	0.0202695
01.20.05.11 metabolism of polyketides	Obs	0	3	0	0	1	2	6
	Exp	1.45875	2.0997	0.0953216	0.674482	1.55013	0.121617
01.20.15 metabolism of derivatives of dehydroquinic acid, shikimic acid and chorismic acid	Obs	0	0	0	1	5	2^	8
	Exp	1.945	2.79961	0.127095	0.89931	2.06683	0.162156
01.20.15.03 metabolism of ubiquinone	Obs	0	0	0	1	4	0	5
	Exp	1.21562	1.74975	0.0794346	0.562069	1.29177	0.101348
01.20.17 metabolism of secondary products derived from primary amino acids	Obs	0	0	0	1	4	0	5
	Exp	1.21562	1.74975	0.0794346	0.562069	1.29177	0.101348
01.20.17.03 metabolism of amines	Obs	0	0	0	0	2	0	2
	Exp	0.48625	0.699901	0.0317739	0.224827	0.516709	0.0405391
01.20.17.09 metabolism of alkaloids	Obs	0	0	0	1	2	0	3
	Exp	0.729374	1.04985	0.0476608	0.337241	0.775063	0.0608086
01.20.19 metabolism of secondary products derived from glycine, L-serine and L-alanine	Obs	0	0	0	0	9^^^	0	9
	Exp	2.18812	3.14956	0.142982	1.01172	2.32519	0.182426
01.20.19.01 metabolism of porphyrins	Obs	0	0	0	0	8^^^	0	8
	Exp	1.945	2.79961	0.127095	0.89931	2.06683	0.162156
01.20.19.03 metabolism of open-chain tetrapyrrols	Obs	0	0	0	0	1	0	1
	Exp	0.243125	0.349951	0.0158869	0.112414	0.258354	0.0202695
01.20.21 metabolism of sulfuric acid and L-cysteine derivatives	Obs	0	0	0	0	1	0	1
	Exp	0.243125	0.349951	0.0158869	0.112414	0.258354	0.0202695
01.20.23 metabolism of secondary products derived from L-methionine	Obs	0	0	0	0	1	0	1
	Exp	0.243125	0.349951	0.0158869	0.112414	0.258354	0.0202695
01.20.33 metabolism of secondary products derived from L-tryptophan	Obs	1	0	0	0	0	0	1
	Exp	0.243125	0.349951	0.0158869	0.112414	0.258354	0.0202695
01.20.35 metabolism of secondary products derived from L-phenylalanine and L-tyrosine	Obs	1	4	0	4	7	1	17
	Exp	4.13312	5.94916	0.270078	1.91103	4.39202	0.344582
01.20.35.01 metabolism of phenylpropanoids	Obs	1	3	0	3	5	1	13
	Exp	3.16062	4.54936	0.20653	1.46138	3.35861	0.263504
01.20.35.01.01 metabolism of melanins	Obs	1	2	0	2	2	1	8
	Exp	1.945	2.79961	0.127095	0.89931	2.06683	0.162156
01.20.36 non-ribosomal peptide synthesis	Obs	0	2	0	1	0	0	3
	Exp	0.729374	1.04985	0.0476608	0.337241	0.775063	0.0608086
01.20.37 metabolism of peptide derived compounds	Obs	0	1	0	0	6	0	7
	Exp	1.70187	2.44965	0.111209	0.786896	1.80848	0.141887
01.20.37.01 metabolism of thioredoxin, glutaredoxin, glutathion	Obs	0	1	0	0	3	0	4
	Exp	0.972499	1.3998	0.0635477	0.449655	1.03342	0.0810781
01.20.37.05 metabolism of beta-lactams	Obs	0	0	0	0	1	0	1
	Exp	0.243125	0.349951	0.0158869	0.112414	0.258354	0.0202695
01.25 extracellular metabolism	Obs	0^^	9	0	9^	9	2	29
	Exp	7.05062	10.1486	0.460721	3.26	7.49228	0.587816
01.25.01 extracellular polysaccharide degradation	Obs	0	6	0	4	5	1	16
	Exp	3.89	5.59921	0.254191	1.79862	4.13367	0.324312
01.25.03 extracellular protein degradation	Obs	0	0	0	1	1	1	3
	Exp	0.729374	1.04985	0.0476608	0.337241	0.775063	0.0608086
01.25.07 extracellular ester compound degradation	Obs	0	0	0	2	1	0	3
	Exp	0.729374	1.04985	0.0476608	0.337241	0.775063	0.0608086
01.25.09 extracellular lignin degradation	Obs	0	2	0	2	1	0	5
	Exp	1.21562	1.74975	0.0794346	0.562069	1.29177	0.101348
01.25.11 extracellular aminosaccharide degradation	Obs	0	1	0	0	1	0	2
	Exp	0.48625	0.699901	0.0317739	0.224827	0.516709	0.0405391
02 ENERGY	Obs	1^^^	14^^^	2	22	151^^^	3	193
	Exp	46.9231	67.5405	3.06618	21.6958	49.8624	3.91202
02.01 glycolysis and gluconeogenesis	Obs	0^	0^^^	1	1	20^^^	0	22
	Exp	5.34875	7.69892	0.349512	2.4731	5.6838	0.44593
02.01.01 glycolysis methylglyoxal bypass	Obs	0	0	0	0	1	0	1
	Exp	0.243125	0.349951	0.0158869	0.112414	0.258354	0.0202695
02.01.03 regulation of glycolysis and gluconeogenesis	Obs	0	0	0	0	1	0	1
	Exp	0.243125	0.349951	0.0158869	0.112414	0.258354	0.0202695
02.04 glyoxylate cycle	Obs	0	0	0	0	6	0	6
	Exp	1.45875	2.0997	0.0953216	0.674482	1.55013	0.121617
02.07 pentose-phosphate pathway	Obs	0	0^	0	1	13^^^	0	14
	Exp	3.40375	4.89931	0.222417	1.57379	3.61696	0.283773
02.07.03 pentose-phosphate pathway non oxidative branch	Obs	0	0	0	0	1	0	1
	Exp	0.243125	0.349951	0.0158869	0.112414	0.258354	0.0202695
02.10 tricarboxylic-acid pathway (citrate cycle, Krebs cycle, TCA cycle)	Obs	0^	1^^	0	0	21^^^	1	23
	Exp	5.59187	8.04887	0.365399	2.58552	5.94215	0.466199
02.11 electron transport and membrane-associated energy conservation	Obs	1^^^	6^^	0	10	34^^^	1	52
	Exp	12.6425	18.1974	0.82612	5.84551	13.4344	1.05402
02.11.05 accessory proteins of electron transport and membrane-associated energy conservation	Obs	0	0	0	1	4	1	6
	Exp	1.45875	2.0997	0.0953216	0.674482	1.55013	0.121617
02.13 respiration	Obs	1^^^	8^^^	1	15	48^^^	1	74
	Exp	17.9912	25.8964	1.17563	8.31861	19.1182	1.49995
02.13.01 anaerobic respiration	Obs	0	0	0	0	1	0	1
	Exp	0.243125	0.349951	0.0158869	0.112414	0.258354	0.0202695
02.13.03 aerobic respiration	Obs	1^	2^^	0	6	19^^^	0	28
	Exp	6.80749	9.79862	0.444834	3.14758	7.23392	0.567547
02.16 fermentation	Obs	0	1	0	0	13^^^	1	15
	Exp	3.64687	5.24926	0.238304	1.68621	3.87531	0.304043
02.16.01 alcohol fermentation	Obs	0	0	0	0	8^^^	0	8
	Exp	1.945	2.79961	0.127095	0.89931	2.06683	0.162156
02.16.03 lactate fermentation	Obs	0	0	0	0	2	0	2
	Exp	0.48625	0.699901	0.0317739	0.224827	0.516709	0.0405391
02.16.03.03 heterofermentative pathway and fermentaton of other saccharides	Obs	0	0	0	0	1	0	1
	Exp	0.243125	0.349951	0.0158869	0.112414	0.258354	0.0202695
02.16.05 butyrate and butanol-acetoine fermentation	Obs	0	0	0	0	0	1	1
	Exp	0.243125	0.349951	0.0158869	0.112414	0.258354	0.0202695
02.16.09 mixed acid and butanediol fermentation	Obs	0	0	0	0	1	0	1
	Exp	0.243125	0.349951	0.0158869	0.112414	0.258354	0.0202695
02.19 metabolism of energy reserves (e.g. glycogen, trehalose)	Obs	0	1	0	2	8^^	0	11
	Exp	2.67437	3.84946	0.174756	1.23655	2.8419	0.222965
02.25 oxidation of fatty acids	Obs	0	1	0	0	14^^^	0	15
	Exp	3.64687	5.24926	0.238304	1.68621	3.87531	0.304043
02.45 energy conversion and regeneration	Obs	0	1	0	4	10^^	0	15
	Exp	3.64687	5.24926	0.238304	1.68621	3.87531	0.304043
02.45.15 energy generation (e.g. ATP synthase)	Obs	0	0	0	3	7^	0	10
	Exp	2.43125	3.49951	0.158869	1.12414	2.58354	0.202695
02.45.20 regulation of energy conversion / regeneration	Obs	0	0	0	1	0	0	1
	Exp	0.243125	0.349951	0.0158869	0.112414	0.258354	0.0202695
10 CELL CYCLE AND DNA PROCESSING	Obs	6^^^	142	16^^	56	163^^^	6	389
	Exp	94.5755	136.131	6.18002	43.7289	100.5	7.88485
10.01 DNA processing	Obs	3^^^	62	4	25	78^^^	4	176
	Exp	42.79	61.5913	2.7961	19.7848	45.4704	3.56744
10.01.02 DNA topology	Obs	0	4	1	1	6	0	12
	Exp	2.9175	4.19941	0.190643	1.34896	3.10025	0.243234
10.01.03 DNA synthesis and replication	Obs	0^^^	17	2	9	29^^^	0	57
	Exp	13.8581	19.9472	0.905555	6.40758	14.7262	1.15536
10.01.03.03 ori recognition and priming complex formation	Obs	0	1	0	0	0	0	1
	Exp	0.243125	0.349951	0.0158869	0.112414	0.258354	0.0202695
10.01.05 DNA recombination and DNA repair	Obs	3^^^	32	1	15	34^	3	88
	Exp	21.395	30.7957	1.39805	9.89241	22.7352	1.78372
10.01.05.01 DNA repair	Obs	2^^^	25	1	11	25	3	67
	Exp	16.2894	23.4467	1.06442	7.53172	17.3097	1.35806
10.01.05.03 DNA recombination	Obs	0	2	0	1	1	0	4
	Exp	0.972499	1.3998	0.0635477	0.449655	1.03342	0.0810781
10.01.09 DNA restriction or modification	Obs	0^^^	13	0	4	16^	1	34
	Exp	8.26624	11.8983	0.540156	3.82207	8.78405	0.689164
10.01.09.05 DNA conformation modification (e.g. chromatin)	Obs	0^^^	13	0	4	15	1	33
	Exp	8.02312	11.5484	0.524269	3.70965	8.52569	0.668894
10.03 cell cycle	Obs	4^^^	84	12^^	34	92^^^	2	228
	Exp	55.4325	79.7888	3.62222	25.6303	58.9048	4.62145
10.03.01 mitotic cell cycle and cell cycle control	Obs	2^^^	50	11^^^	25	60^^^	1	149
	Exp	36.2256	52.1427	2.36715	16.7496	38.4948	3.02016
10.03.01.01 mitotic cell cycle	Obs	0	6	1	1	3	0	11
	Exp	2.67437	3.84946	0.174756	1.23655	2.8419	0.222965
10.03.01.01.03 G1/S transition of mitotic cell cycle	Obs	0	2	0	1	1	0	4
	Exp	0.972499	1.3998	0.0635477	0.449655	1.03342	0.0810781
10.03.01.01.05 S phase of mitotic cell cycle	Obs	0	1	0	0	0	0	1
	Exp	0.243125	0.349951	0.0158869	0.112414	0.258354	0.0202695
10.03.01.01.07 G2 phase of mitotic cell cycle	Obs	0	1	0	0	1	0	2
	Exp	0.48625	0.699901	0.0317739	0.224827	0.516709	0.0405391
10.03.01.01.11 M phase	Obs	0	0	1	0	0	0	1
	Exp	0.243125	0.349951	0.0158869	0.112414	0.258354	0.0202695
10.03.01.02 cell cycle arrest	Obs	0	0	0	0	1	0	1
	Exp	0.243125	0.349951	0.0158869	0.112414	0.258354	0.0202695
10.03.01.03 cell cycle checkpoints (checkpoints of morphogenesis, DNA-damage,-replication, mitotic phase and spindle)	Obs	0	10^	0	2	3	0	15
	Exp	3.64687	5.24926	0.238304	1.68621	3.87531	0.304043
10.03.02 meiosis	Obs	1	13	0	2	5	1	22
	Exp	5.34875	7.69892	0.349512	2.4731	5.6838	0.44593
10.03.03 cytokinesis (cell division) /septum formation and hydrolysis	Obs	0^^^	13	2	5	18^	0	38
	Exp	9.23874	13.2981	0.603703	4.27172	9.81746	0.770242
10.03.04 nuclear and chromosomal cycle	Obs	0^^	11	1	5	12	0	29
	Exp	7.05062	10.1486	0.460721	3.26	7.49228	0.587816
10.03.04.01 centromere/kinetochore complex maturation	Obs	0	1	0	0	0	0	1
	Exp	0.243125	0.349951	0.0158869	0.112414	0.258354	0.0202695
10.03.04.03 chromosome condensation	Obs	0	2	0	2	6	0	10
	Exp	2.43125	3.49951	0.158869	1.12414	2.58354	0.202695
10.03.04.05 chromosome segregation/division	Obs	0	4	1	2	5	0	12
	Exp	2.9175	4.19941	0.190643	1.34896	3.10025	0.243234
10.03.04.07 nuclear division	Obs	0	0	0	1	0	0	1
	Exp	0.243125	0.349951	0.0158869	0.112414	0.258354	0.0202695
10.03.04.09 nuclear migration	Obs	0	4	0	0	2	0	6
	Exp	1.45875	2.0997	0.0953216	0.674482	1.55013	0.121617
10.03.05 cell cycle dependent cytoskeleton reorganization	Obs	1	2	0	2	6	0	11
	Exp	2.67437	3.84946	0.174756	1.23655	2.8419	0.222965
10.03.05.01 spindle pole body/centrosome and microtubule cycle	Obs	1	1	0	1	6^	0	9
	Exp	2.18812	3.14956	0.142982	1.01172	2.32519	0.182426
10.03.05.03 cell cycle dependent actin filament reorganization	Obs	0	0	0	1	0	0	1
	Exp	0.243125	0.349951	0.0158869	0.112414	0.258354	0.0202695
11 TRANSCRIPTION	Obs	13^^^	217^^^	12	56	199^^^	4	501
	Exp	121.806	175.325	7.95935	56.3193	129.436	10.155
11.02 RNA synthesis	Obs	11^^^	185^^^	9	39	111	3	358
	Exp	87.0387	125.282	5.68752	40.2441	92.4909	7.25649
11.02.01 rRNA synthesis	Obs	0^^^	12	0	4	20^^^	0	36
	Exp	8.75249	12.5982	0.571929	4.04689	9.30076	0.729703
11.02.02 tRNA synthesis	Obs	0^^	10	1	2	13^	0	26
	Exp	6.32124	9.09872	0.41306	2.92276	6.71721	0.527008
11.02.03 mRNA synthesis	Obs	11^^^	167^^^	8	33	90	3	312
	Exp	75.8549	109.185	4.95672	35.0731	80.6066	6.32409
11.02.03.01 general transcription activities	Obs	0^^^	15	2	4	19^	1	41
	Exp	9.96812	14.348	0.651364	4.60896	10.5925	0.831051
11.02.03.01.01 transcription initiation	Obs	0	0	0	0	1	0	1
	Exp	0.243125	0.349951	0.0158869	0.112414	0.258354	0.0202695
11.02.03.04 transcriptional control	Obs	10^^^	140^^^	6	25	37^^	2	220
	Exp	53.4875	76.9892	3.49512	24.731	56.838	4.4593
11.02.03.04.01 transcription activation	Obs	1	19^^^	0	1	0^	1	22
	Exp	5.34875	7.69892	0.349512	2.4731	5.6838	0.44593
11.02.03.04.03 transcription repression	Obs	1	8	0	4	3	0	16
	Exp	3.89	5.59921	0.254191	1.79862	4.13367	0.324312
11.04 RNA processing	Obs	2^^^	45^^	3	22	111^^^	1	184
	Exp	44.735	64.3909	2.92319	20.6841	47.5372	3.72959
11.04.01 rRNA processing	Obs	0^^^	15	1	6	33^^^	0	55
	Exp	13.3719	19.2473	0.873781	6.18275	14.2095	1.11482
11.04.02 tRNA processing	Obs	0^	8	0	3	9	1	21
	Exp	5.10562	7.34896	0.333625	2.36069	5.42544	0.42566
11.04.03 mRNA processing (splicing, 5'-, 3'-end processing)	Obs	2^^^	28^	2	13	77^^^	0	122
	Exp	29.6612	42.694	1.93821	13.7145	31.5192	2.47288
11.04.03.01 splicing	Obs	1^^^	12^^^	2	8	62^^^	0	85
	Exp	20.6656	29.7458	1.35039	9.55517	21.9601	1.72291
11.04.03.01.10 regulation of splicing	Obs	0	1	0	0	0	0	1
	Exp	0.243125	0.349951	0.0158869	0.112414	0.258354	0.0202695
11.04.03.03 5'-end processing	Obs	0	2	0	1	2	0	5
	Exp	1.21562	1.74975	0.0794346	0.562069	1.29177	0.101348
11.04.03.05 3'-end processing	Obs	1	3	0	2	4	0	10
	Exp	2.43125	3.49951	0.158869	1.12414	2.58354	0.202695
11.04.03.11 control of mRNA stability	Obs	0	2	0	1	1	0	4
	Exp	0.972499	1.3998	0.0635477	0.449655	1.03342	0.0810781
11.06 RNA modification	Obs	0	4	1	3	9	0	17
	Exp	4.13312	5.94916	0.270078	1.91103	4.39202	0.344582
11.06.02 tRNA modification	Obs	0	4	1	3	9	0	17
	Exp	4.13312	5.94916	0.270078	1.91103	4.39202	0.344582
12 PROTEIN SYNTHESIS	Obs	1^^^	36^^^	10^	16^	197^^^	4	264
	Exp	64.1849	92.387	4.19415	29.6772	68.2055	5.35116
12.01 ribosome biogenesis	Obs	1^^^	27^^^	6	11	114^^^	1	160
	Exp	38.9	55.9921	2.54191	17.9862	41.3367	3.24312
12.01.01 ribosomal proteins	Obs	0^^^	16^^^	4	7	73^^^	1	101
	Exp	24.5556	35.345	1.60458	11.3538	26.0938	2.04722
12.04 translation	Obs	0^^^	5^^^	2	2	41^^^	2	52
	Exp	12.6425	18.1974	0.82612	5.84551	13.4344	1.05402
12.04.01 translation initiation	Obs	0^^	4^	2	1	24^^^	1	32
	Exp	7.77999	11.1984	0.508382	3.59724	8.26734	0.648625
12.04.02 translation elongation	Obs	0	0	0	0	9^^^	0	9
	Exp	2.18812	3.14956	0.142982	1.01172	2.32519	0.182426
12.04.03 translation termination	Obs	0	0	0	0	3	0	3
	Exp	0.729374	1.04985	0.0476608	0.337241	0.775063	0.0608086
12.07 translational control	Obs	0^	3	2	2	13^^	0	20
	Exp	4.8625	6.99901	0.317739	2.24827	5.16709	0.405391
12.10 aminoacyl-tRNA-synthetases	Obs	0^^^	1^^^	0	1	32^^^	0	34
	Exp	8.26624	11.8983	0.540156	3.82207	8.78405	0.689164
14 PROTEIN FATE (folding, modification, destination)	Obs	14^^^	144^^^	18^	93^^	308^^^	10	587
	Exp	142.714	205.421	9.32563	65.9869	151.654	11.8982
14.01 protein folding and stabilization	Obs	1^^^	7^^	0	6	40^^^	0	54
	Exp	13.1287	18.8973	0.857894	6.07034	13.9511	1.09455
14.04 protein targeting, sorting and translocation	Obs	0^^^	18^^	2	25^^^	52^^^	1	98
	Exp	23.8262	34.2952	1.55692	11.0165	25.3187	1.98641
14.07 protein modification	Obs	7^^^	80	11^	44^	122^^^	5	269
	Exp	65.4006	94.1367	4.27358	30.2393	69.4973	5.4525
14.07.01 modification with fatty acids (e.g. myristylation, palmitylation, farnesylation)	Obs	0	3	0	0	4	0	7
	Exp	1.70187	2.44965	0.111209	0.786896	1.80848	0.141887
14.07.02 modification with sugar residues (e.g. glycosylation, deglycosylation)	Obs	0^^	4	4^^	7	11	1	27
	Exp	6.56437	9.44867	0.428947	3.03517	6.97557	0.547277
14.07.02.01 O-directed glycosylation, deglycosylation	Obs	0	1	0	0	0	0	1
	Exp	0.243125	0.349951	0.0158869	0.112414	0.258354	0.0202695
14.07.03 modification by phosphorylation, dephosphorylation, autophosphorylation	Obs	6^^^	39	4	21	43^	0	113
	Exp	27.4731	39.5444	1.79522	12.7028	29.194	2.29046
14.07.04 modification by acetylation, deacetylation	Obs	0	7	0	1	7	0	15
	Exp	3.64687	5.24926	0.238304	1.68621	3.87531	0.304043
14.07.05 modification by ubiquitination, deubiquitination	Obs	1^	8	1	1	19^^^	0	30
	Exp	7.29374	10.4985	0.476608	3.37241	7.75063	0.608086
14.07.07 modification by ubiquitin-related proteins	Obs	0	0	0	0	1	0	1
	Exp	0.243125	0.349951	0.0158869	0.112414	0.258354	0.0202695
14.07.09 posttranslational modification of amino acids (e.g. hydroxylation, methylation)	Obs	0	3	0	1	6	2	12
	Exp	2.9175	4.19941	0.190643	1.34896	3.10025	0.243234
14.07.11 protein processing (proteolytic)	Obs	0	4	0	3	5	0	12
	Exp	2.9175	4.19941	0.190643	1.34896	3.10025	0.243234
14.07.11.01 autoproteolytic processing	Obs	0	1	0	0	0	0	1
	Exp	0.243125	0.349951	0.0158869	0.112414	0.258354	0.0202695
14.10 assembly of protein complexes	Obs	0^^^	15	2	10	28^^^	1	56
	Exp	13.615	19.5972	0.889668	6.29517	14.4678	1.13509
14.13 protein/peptide degradation	Obs	6^^^	32^^	5	13	86^^^	3	145
	Exp	35.2531	50.7429	2.3036	16.3	37.4614	2.93908
14.13.01 cytoplasmic and nuclear protein degradation	Obs	0^^^	7^	3	2	31^^^	0	43
	Exp	10.4544	15.0479	0.683138	4.83379	11.1092	0.87159
14.13.01.01 proteasomal degradation (ubiquitin/proteasomal pathway)	Obs	0^	1^	1	1	17^^^	0	20
	Exp	4.8625	6.99901	0.317739	2.24827	5.16709	0.405391
14.13.04 lysosomal and vacuolar protein degradation	Obs	0	1	0	1	6^	0	8
	Exp	1.945	2.79961	0.127095	0.89931	2.06683	0.162156
14.13.04.02 vacuolar protein degradation	Obs	0	0	0	1	1	0	2
	Exp	0.48625	0.699901	0.0317739	0.224827	0.516709	0.0405391
16 PROTEIN WITH BINDING FUNCTION OR COFACTOR REQUIREMENT (structural or catalytic)	Obs	9^^^	94	7	44	173^^^	1	328
	Exp	79.7449	114.784	5.21091	36.8717	84.7402	6.64841
16.01 protein binding	Obs	1^^^	17	3	8	31^^^	0	60
	Exp	14.5875	20.997	0.953216	6.74482	15.5013	1.21617
16.03 nucleic acid binding	Obs	4^^^	47	3	18	39	1	112
	Exp	27.23	39.1945	1.77934	12.5903	28.9357	2.27019
16.03.01 DNA binding	Obs	3^^^	39^^	2	8	19	1	72
	Exp	17.505	25.1964	1.14386	8.09379	18.6015	1.45941
16.03.03 RNA binding	Obs	1^^	7	1	9	20^^	0	38
	Exp	9.23874	13.2981	0.603703	4.27172	9.81746	0.770242
16.05 polysaccharide binding	Obs	0	5	0	2	4	0	11
	Exp	2.67437	3.84946	0.174756	1.23655	2.8419	0.222965
16.07 structural protein binding	Obs	0	0	1	0	2	0	3
	Exp	0.729374	1.04985	0.0476608	0.337241	0.775063	0.0608086
16.09 lipid binding	Obs	0	2	0	2	0	0	4
	Exp	0.972499	1.3998	0.0635477	0.449655	1.03342	0.0810781
16.13 C-compound binding	Obs	0	2	0	1	3	0	6
	Exp	1.45875	2.0997	0.0953216	0.674482	1.55013	0.121617
16.13.01 sugar binding	Obs	0	0	0	1	1	0	2
	Exp	0.48625	0.699901	0.0317739	0.224827	0.516709	0.0405391
16.13.03 fatty acid binding (e.g. acyl-carrier protein)	Obs	0	1	0	0	1	0	2
	Exp	0.48625	0.699901	0.0317739	0.224827	0.516709	0.0405391
16.17 metal binding	Obs	3	9	0	3	20^^^	0	35
	Exp	8.50937	12.2483	0.556042	3.93448	9.0424	0.709434
16.17.01 calcium binding	Obs	0	2	0	0	7^^	0	9
	Exp	2.18812	3.14956	0.142982	1.01172	2.32519	0.182426
16.17.07 magnesium binding	Obs	0	0	0	1	0	0	1
	Exp	0.243125	0.349951	0.0158869	0.112414	0.258354	0.0202695
16.17.09 heavy metal binding (Cu, Fe, Zn)	Obs	3	7	0	2	13^	0	25
	Exp	6.07812	8.74877	0.397173	2.81034	6.45886	0.506738
16.19 nucleotide/nucleoside/nucleobase binding	Obs	1^^^	11^^^	0	8	74^^^	0	94
	Exp	22.8537	32.8954	1.49337	10.5669	24.2853	1.90534
16.19.01 cyclic nucleotide binding (cAMP, cGMP, etc.)	Obs	0	0	0	0	1	0	1
	Exp	0.243125	0.349951	0.0158869	0.112414	0.258354	0.0202695
16.19.03 ATP binding	Obs	0^^^	4^^	0	6	29^^^	0	39
	Exp	9.48187	13.6481	0.61959	4.38413	10.0758	0.790512
16.19.05 GTP binding	Obs	1^^^	5^^	0	2	40^^^	0	48
	Exp	11.67	16.7976	0.762573	5.39586	12.401	0.972937
16.21 complex cofactor/cosubstrate/vitamine binding	Obs	0	3	0	2	12^^^	0	17
	Exp	4.13312	5.94916	0.270078	1.91103	4.39202	0.344582
16.21.01 heme binding	Obs	0	1	0	2	1	0	4
	Exp	0.972499	1.3998	0.0635477	0.449655	1.03342	0.0810781
16.21.05 FAD/FMN binding	Obs	0	2	0	0	4	0	6
	Exp	1.45875	2.0997	0.0953216	0.674482	1.55013	0.121617
16.21.07 NAD/NADP binding	Obs	0	0	0	0	7	0	7
	Exp	1.70187	2.44965	0.111209	0.786896	1.80848	0.141887
16.21.15 biotin binding	Obs	0	0	0	0	1	0	1
	Exp	0.243125	0.349951	0.0158869	0.112414	0.258354	0.0202695
18 REGULATION OF METABOLISM AND PROTEIN FUNCTION	Obs	0^^^	17	3	12	26^	1	59
	Exp	14.3444	20.6471	0.937329	6.63241	15.2429	1.1959
18.01 regulation by	Obs	0	2	0	1	3	0	6
	Exp	1.45875	2.0997	0.0953216	0.674482	1.55013	0.121617
18.01.01 regulation by modification	Obs	0	1	0	1	2	0	4
	Exp	0.972499	1.3998	0.0635477	0.449655	1.03342	0.0810781
18.01.07 regulation by binding / dissociation	Obs	0	1	0	0	1	0	2
	Exp	0.48625	0.699901	0.0317739	0.224827	0.516709	0.0405391
18.02 regulation of protein activity	Obs	0^^^	15	3	12	26^^	1	57
	Exp	13.8581	19.9472	0.905555	6.40758	14.7262	1.15536
18.02.01 enzymatic activity regulation / enzyme regulator	Obs	0^^^	11	2	10	21^	1	45
	Exp	10.9406	15.7478	0.714912	5.05862	11.6259	0.912129
18.02.01.01 enzyme activator	Obs	0^	6	0	4	7	1	18
	Exp	4.37625	6.29911	0.285965	2.02345	4.65038	0.364852
18.02.01.01.01 GTPase activator (GAP)	Obs	0	3	0	1	0	0	4
	Exp	0.972499	1.3998	0.0635477	0.449655	1.03342	0.0810781
18.02.01.01.05 kinase activator	Obs	0	1	0	0	0	0	1
	Exp	0.243125	0.349951	0.0158869	0.112414	0.258354	0.0202695
18.02.01.02 enzyme inhibitor	Obs	0	1	1	0	4	0	6
	Exp	1.45875	2.0997	0.0953216	0.674482	1.55013	0.121617
18.02.01.02.03 protease inhibitor	Obs	0	1	0	0	0	0	1
	Exp	0.243125	0.349951	0.0158869	0.112414	0.258354	0.0202695
18.02.01.02.05 kinase inhibitior	Obs	0	0	1	0	0	0	1
	Exp	0.243125	0.349951	0.0158869	0.112414	0.258354	0.0202695
18.02.03 guanyl-nucleotide exchange factor (GEF)	Obs	0	0	0	2	1	0	3
	Exp	0.729374	1.04985	0.0476608	0.337241	0.775063	0.0608086
18.02.05 regulator of G-protein signalling	Obs	0	4	1	0	4	0	9
	Exp	2.18812	3.14956	0.142982	1.01172	2.32519	0.182426
20 CELLULAR TRANSPORT, TRANSPORT FACILITIES AND TRANSPORT ROUTES	Obs	14^^^	130^^^	17	169^^^	293^^^	9	632
	Exp	153.655	221.169	10.0405	71.0455	163.28	12.8103
20.01 transported compounds (substrates)	Obs	6^^^	59^^^	9	118^^^	144^^^	6	342
	Exp	83.1487	119.683	5.43333	38.4455	88.3572	6.93218
20.01.01 ion transport	Obs	1^^^	8^^^	4	25^^^	42^^^	3	83
	Exp	20.1794	29.0459	1.31862	9.33034	21.4434	1.68237
20.01.01.01 cation transport (H+, Na+, K+, Ca2+ , NH4+, etc.)	Obs	0^^^	7^^^	4	18^^	35^^^	3	67
	Exp	16.2894	23.4467	1.06442	7.53172	17.3097	1.35806
20.01.01.01.01 heavy metal ion transport (Cu+, Fe3+, etc.)	Obs	0^^	5	2	11^^^	9	1	28
	Exp	6.80749	9.79862	0.444834	3.14758	7.23392	0.567547
20.01.01.01.01.01 siderophore-iron transport	Obs	0	0	0	0	0	0	0
	Exp	0	0	0	0	0	0
20.01.01.07 anion transport	Obs	1	1	0	6^	6	0	14
	Exp	3.40375	4.89931	0.222417	1.57379	3.61696	0.283773
20.01.01.07.05 sulfate/sulfite transport	Obs	0	0	0	3	0	0	3
	Exp	0.729374	1.04985	0.0476608	0.337241	0.775063	0.0608086
20.01.01.07.07 phosphate transport	Obs	1	1	0	1	5	0	8
	Exp	1.945	2.79961	0.127095	0.89931	2.06683	0.162156
20.01.01.07.09 chloride transport	Obs	0	0	0	1	0	0	1
	Exp	0.243125	0.349951	0.0158869	0.112414	0.258354	0.0202695
20.01.03 C-compound and carbohydrate transport	Obs	0^^^	12^^	0	40^^^	22	1	75
	Exp	18.2344	26.2463	1.19152	8.43103	19.3766	1.52021
20.01.03.01 sugar transport	Obs	0	1	0	1	1	0	3
	Exp	0.729374	1.04985	0.0476608	0.337241	0.775063	0.0608086
20.01.03.03 C4-dicarboxylate transport (e.g. malate, succinate, fumarate)	Obs	0	2	0	0	0	0	2
	Exp	0.48625	0.699901	0.0317739	0.224827	0.516709	0.0405391
20.01.07 amino acid/amino acid derivatives transport	Obs	0^	2^	0	12^^^	9	0	23
	Exp	5.59187	8.04887	0.365399	2.58552	5.94215	0.466199
20.01.09 peptide transport	Obs	0	0	0	3	0	0	3
	Exp	0.729374	1.04985	0.0476608	0.337241	0.775063	0.0608086
20.01.10 protein transport	Obs	0	0	1	0	2	0	3
	Exp	0.729374	1.04985	0.0476608	0.337241	0.775063	0.0608086
20.01.13 lipid/fatty acid transport	Obs	0^	3	1	7^	8	0	19
	Exp	4.61937	6.64906	0.301852	2.13586	4.90873	0.385121
20.01.15 electron transport	Obs	0^^^	8^^	0	9	36^^^	1	54
	Exp	13.1287	18.8973	0.857894	6.07034	13.9511	1.09455
20.01.17 nucleotide/nucleoside/nucleobase transport	Obs	0	1	0	2	8^^	0	11
	Exp	2.67437	3.84946	0.174756	1.23655	2.8419	0.222965
20.01.21 RNA transport	Obs	0	4	3^^	0	4	0	11
	Exp	2.67437	3.84946	0.174756	1.23655	2.8419	0.222965
20.01.23 allantoin and allantoate transport	Obs	0	0	0	4	0	0	4
	Exp	0.972499	1.3998	0.0635477	0.449655	1.03342	0.0810781
20.01.25 vitamine/cofactor transport	Obs	1	2	0	3	3	0	9
	Exp	2.18812	3.14956	0.142982	1.01172	2.32519	0.182426
20.01.27 drug/toxin transport	Obs	4^^	20	1	17^^^	14	1	57
	Exp	13.8581	19.9472	0.905555	6.40758	14.7262	1.15536
20.03 transport facilities	Obs	1^^^	22^^^	2	53^^^	91^^^	2	171
	Exp	41.5743	59.8416	2.71666	19.2227	44.1786	3.46609
20.03.01 channel / pore class transport	Obs	0	3	0	2	7	0	12
	Exp	2.9175	4.19941	0.190643	1.34896	3.10025	0.243234
20.03.01.01 ion channels	Obs	0	2	0	1	5	0	8
	Exp	1.945	2.79961	0.127095	0.89931	2.06683	0.162156
20.03.01.05 nuclear pore forming protein	Obs	0	1	0	0	0	0	1
	Exp	0.243125	0.349951	0.0158869	0.112414	0.258354	0.0202695
20.03.02 carrier (electrochemical potential-driven transport)	Obs	0	2	0	4	4	0	10
	Exp	2.43125	3.49951	0.158869	1.12414	2.58354	0.202695
20.03.02.02 symporter	Obs	0	0	0	0	3	0	3
	Exp	0.729374	1.04985	0.0476608	0.337241	0.775063	0.0608086
20.03.02.02.01 proton driven symporter	Obs	0	0	0	0	3	0	3
	Exp	0.729374	1.04985	0.0476608	0.337241	0.775063	0.0608086
20.03.02.03 antiporter	Obs	0	2	0	4	1	0	7
	Exp	1.70187	2.44965	0.111209	0.786896	1.80848	0.141887
20.03.02.03.01 proton driven antiporter	Obs	0	1	0	1	1	0	3
	Exp	0.729374	1.04985	0.0476608	0.337241	0.775063	0.0608086
20.03.09 phosphotransferase system	Obs	0	0	0	0	0	1	1
	Exp	0.243125	0.349951	0.0158869	0.112414	0.258354	0.0202695
20.03.22 transport ATPases	Obs	1^^^	2^^^	2	7	32^^^	0	44
	Exp	10.6975	15.3978	0.699025	4.9462	11.3676	0.891859
20.03.25 ABC transporters	Obs	0^^	5	0	9^	17^^	0	31
	Exp	7.53687	10.8485	0.492495	3.48483	8.00898	0.628355
20.09 transport routes	Obs	9^^^	86^^^	12	106^^^	186^^^	5	404
	Exp	98.2224	141.38	6.41832	45.4151	104.375	8.18889
20.09.01 nuclear transport	Obs	2^	14	3	2	13	0	34
	Exp	8.26624	11.8983	0.540156	3.82207	8.78405	0.689164
20.09.03 peroxisomal transport	Obs	0	1	0	2	1	0	4
	Exp	0.972499	1.3998	0.0635477	0.449655	1.03342	0.0810781
20.09.04 mitochondrial transport	Obs	0^^^	6^^	1	9	32^^^	0	48
	Exp	11.67	16.7976	0.762573	5.39586	12.401	0.972937
20.09.05 non-vesicular ER transport	Obs	0	0	0	0	2	0	2
	Exp	0.48625	0.699901	0.0317739	0.224827	0.516709	0.0405391
20.09.07 vesicular transport (Golgi network, etc.)	Obs	4^^^	19^^^	0	18	67^^^	1	109
	Exp	26.5006	38.1446	1.73168	12.2531	28.1606	2.20938
20.09.07.03 ER to Golgi transport	Obs	0	1	0	3	11^^^	0	15
	Exp	3.64687	5.24926	0.238304	1.68621	3.87531	0.304043
20.09.07.05 intra Golgi transport	Obs	0	2	0	0	1	0	3
	Exp	0.729374	1.04985	0.0476608	0.337241	0.775063	0.0608086
20.09.07.25 vesicle formation	Obs	0	0	0	0	1	0	1
	Exp	0.243125	0.349951	0.0158869	0.112414	0.258354	0.0202695
20.09.07.27 vesicle fusion	Obs	0	1	0	1	1	0	3
	Exp	0.729374	1.04985	0.0476608	0.337241	0.775063	0.0608086
20.09.13 vacuolar/lysosomal transport	Obs	0^^^	9	0	8	22^^	2	41
	Exp	9.96812	14.348	0.651364	4.60896	10.5925	0.831051
20.09.14 cytoskeleton-dependent transport	Obs	1	6	1	3	13^	0	24
	Exp	5.835	8.39882	0.381286	2.69793	6.2005	0.486469
20.09.14.01 tubulin dependent transport	Obs	0	0	0	0	1	0	1
	Exp	0.243125	0.349951	0.0158869	0.112414	0.258354	0.0202695
20.09.14.02 actin dependent transport	Obs	0	2	0	0	2	0	4
	Exp	0.972499	1.3998	0.0635477	0.449655	1.03342	0.0810781
20.09.05 non-vesicular ER transport	Obs	0	0	0	0	2	0	2
	Exp	0.48625	0.699901	0.0317739	0.224827	0.516709	0.0405391
20.09.16 cellular export and secretion	Obs	3^^^	19	4	21^^^	15	1	63
	Exp	15.3169	22.0469	1.00088	7.08206	16.2763	1.27698
20.09.16.01 Type I protein secretion system (ABC-type transport systems)	Obs	0	1	0	2	2	0	5
	Exp	1.21562	1.74975	0.0794346	0.562069	1.29177	0.101348
20.09.16.02 Type II protein secretion system (general secretory pathway, exocytosis)	Obs	0	0	1	0	1	0	2
	Exp	0.48625	0.699901	0.0317739	0.224827	0.516709	0.0405391
20.09.16.07 non-vesicular cellular export	Obs	0	0	0	1	0	0	1
	Exp	0.243125	0.349951	0.0158869	0.112414	0.258354	0.0202695
20.09.16.09 vesicular cellular export	Obs	0	1	0	0	1	0	2
	Exp	0.48625	0.699901	0.0317739	0.224827	0.516709	0.0405391
20.09.16.09.03 exocytosis	Obs	0	1	0	0	1	0	2
	Exp	0.48625	0.699901	0.0317739	0.224827	0.516709	0.0405391
20.09.18 cellular import	Obs	0^^^	15^^^	3	45^^^	29	1	93
	Exp	22.6106	32.5454	1.47748	10.4545	24.027	1.88507
20.09.18.07 non-vesicular cellular import	Obs	0^^^	8^^	2	29^^^	16	0	55
	Exp	13.3719	19.2473	0.873781	6.18275	14.2095	1.11482
20.09.18.09 vesicular cellular import	Obs	0	2	1	1	3	0	7
	Exp	1.70187	2.44965	0.111209	0.786896	1.80848	0.141887
20.09.18.09.01 endocytosis	Obs	0	2	1	1	3	0	7
	Exp	1.70187	2.44965	0.111209	0.786896	1.80848	0.141887
30 CELLULAR COMMUNICATION/SIGNAL TRANSDUCTION MECHANISM	Obs	5^^^	57	5	29	81^^^	1	178
	Exp	43.2762	62.2912	2.82787	20.0096	45.9871	3.60798
30.01 cellular signalling	Obs	5^^^	51	5	27	78^^^	1	167
	Exp	40.6018	58.4418	2.65312	18.7731	43.1452	3.38501
30.01.05 enzyme mediated signal transduction	Obs	1^^^	17	1	9	28^^	1	57
	Exp	13.8581	19.9472	0.905555	6.40758	14.7262	1.15536
30.01.05.01 protein kinase	Obs	0	5	1	3	6	0	15
	Exp	3.64687	5.24926	0.238304	1.68621	3.87531	0.304043
30.01.05.01.03 MAPKKK cascade	Obs	0	3	0	3	3	0	9
	Exp	2.18812	3.14956	0.142982	1.01172	2.32519	0.182426
30.01.05.05 G-protein mediated signal transduction	Obs	0^	2	0	3	15^^^	0	20
	Exp	4.8625	6.99901	0.317739	2.24827	5.16709	0.405391
30.01.05.05.01 small GTPase mediated signal transduction	Obs	0	0	0	0	3	0	3
	Exp	0.729374	1.04985	0.0476608	0.337241	0.775063	0.0608086
30.01.05.05.03 trimeric G-protein mediated signal transduction	Obs	0	0	0	1	1	0	2
	Exp	0.48625	0.699901	0.0317739	0.224827	0.516709	0.0405391
30.01.05.07 two-component signal transduction system (e.g. phosphorelay)	Obs	0	1	0	0	0	0	1
	Exp	0.243125	0.349951	0.0158869	0.112414	0.258354	0.0202695
30.01.09 second messenger mediated signal transduction	Obs	1	3	0	5	7	0	16
	Exp	3.89	5.59921	0.254191	1.79862	4.13367	0.324312
30.01.09.03 Ca2+ mediated signal transduction	Obs	1	1	0	0	4	0	6
	Exp	1.45875	2.0997	0.0953216	0.674482	1.55013	0.121617
30.01.09.07 cAMP/cGMP mediated signal transduction	Obs	0	1	0	2	3	0	6
	Exp	1.45875	2.0997	0.0953216	0.674482	1.55013	0.121617
30.01.09.11 polyphosphoinositol mediated signal transduction	Obs	0	1	0	3	0	0	4
	Exp	0.972499	1.3998	0.0635477	0.449655	1.03342	0.0810781
30.05 transmembrane signal transduction	Obs	0	7	0	2	2	0	11
	Exp	2.67437	3.84946	0.174756	1.23655	2.8419	0.222965
30.05.01 receptor enzyme mediated signalling	Obs	0	4	0	0	1	0	5
	Exp	1.21562	1.74975	0.0794346	0.562069	1.29177	0.101348
30.05.01.10 two-component signal transduction system (sensor kinase component)	Obs	0	2	0	0	1	0	3
	Exp	0.729374	1.04985	0.0476608	0.337241	0.775063	0.0608086
30.05.02 non-enzymatic receptor mediated signalling	Obs	0	1	0	0	1	0	2
	Exp	0.48625	0.699901	0.0317739	0.224827	0.516709	0.0405391
30.05.02.14 Notch-receptor signalling pathway	Obs	0	0	0	0	1	0	1
	Exp	0.243125	0.349951	0.0158869	0.112414	0.258354	0.0202695
30.05.02.24 G-protein coupled receptor signalling pathway	Obs	0	1	0	0	0	0	1
	Exp	0.243125	0.349951	0.0158869	0.112414	0.258354	0.0202695
32 CELL RESCUE, DEFENSE AND VIRULENCE	Obs	14^^^	107	5	61^^^	99^	9	295
	Exp	71.7218	103.235	4.68664	33.162	76.2145	5.97951
32.01 stress response	Obs	2^^^	28	4	18	54^^^	1	107
	Exp	26.0144	37.4447	1.6999	12.0283	27.6439	2.16884
32.01.01 oxidative stress response	Obs	0	3	1	0	9^^	0	13
	Exp	3.16062	4.54936	0.20653	1.46138	3.35861	0.263504
32.01.03 osmotic and salt stress response	Obs	0	2	0	3	3	0	8
	Exp	1.945	2.79961	0.127095	0.89931	2.06683	0.162156
32.01.04 pH stress response	Obs	0	0	0	0	1	0	1
	Exp	0.243125	0.349951	0.0158869	0.112414	0.258354	0.0202695
32.01.05 heat shock response	Obs	0	2	1	1	6	1	11
	Exp	2.67437	3.84946	0.174756	1.23655	2.8419	0.222965
32.01.09 DNA damage response	Obs	0	0	0	0	2	0	2
	Exp	0.48625	0.699901	0.0317739	0.224827	0.516709	0.0405391
32.01.11 nutrient starvation response	Obs	0	5	0	2	3	0	10
	Exp	2.43125	3.49951	0.158869	1.12414	2.58354	0.202695
32.05 disease, virulence and defense	Obs	9^^^	55^	2	25^^	23	4	118
	Exp	28.6887	41.2942	1.87466	13.2648	30.4858	2.3918
32.05.01 resistance proteins	Obs	1^^	16	2	13^^	10	0	42
	Exp	10.2112	14.6979	0.667251	4.72138	10.8509	0.85132
32.05.01.01 antibiotic resistance	Obs	0	0	0	2	1	0	3
	Exp	0.729374	1.04985	0.0476608	0.337241	0.775063	0.0608086
32.05.01.03 chemical agent resistance	Obs	0	5	2	4	3	0	14
	Exp	3.40375	4.89931	0.222417	1.57379	3.61696	0.283773
32.05.01.03.03 inorganic chemical agent resistance (e.g. heavy metals)	Obs	0	0	0	3	2	0	5
	Exp	1.21562	1.74975	0.0794346	0.562069	1.29177	0.101348
32.05.03 defense related proteins	Obs	1	6	0	2	3	0	12
	Exp	2.9175	4.19941	0.190643	1.34896	3.10025	0.243234
32.05.05 virulence, disease factors	Obs	4^	25	0	9	6	4	48
	Exp	11.67	16.7976	0.762573	5.39586	12.401	0.972937
32.05.05.01 toxins	Obs	1	6	0	0	1	1	9
	Exp	2.18812	3.14956	0.142982	1.01172	2.32519	0.182426
32.05.05.03 bacteriocins	Obs	0	1	0	0	0	0	1
	Exp	0.243125	0.349951	0.0158869	0.112414	0.258354	0.0202695
32.05.05.13 antigenic determinants	Obs	1	0	0	0	0	0	1
	Exp	0.243125	0.349951	0.0158869	0.112414	0.258354	0.0202695
32.07 detoxification	Obs	3^^^	31	2	26^^^	30	4	96
	Exp	23.34	33.5953	1.52515	10.7917	24.802	1.94587
32.07.01 detoxification involving cytochrome P450	Obs	0	11^^	0	2	0	0	13
	Exp	3.16062	4.54936	0.20653	1.46138	3.35861	0.263504
32.07.03 detoxification by modification	Obs	0	1	0	4	2	0	7
	Exp	1.70187	2.44965	0.111209	0.786896	1.80848	0.141887
32.07.05 detoxification by export	Obs	2^	7	1	15^^^	7	1	33
	Exp	8.02312	11.5484	0.524269	3.70965	8.52569	0.668894
32.07.07 oxygen and radical detoxification	Obs	0	1	0	0	14^^^	0	15
	Exp	3.64687	5.24926	0.238304	1.68621	3.87531	0.304043
32.07.07.01 catalase reaction	Obs	0	0	0	0	4	0	4
	Exp	0.972499	1.3998	0.0635477	0.449655	1.03342	0.0810781
32.07.07.03 glutathione conjugation reaction	Obs	0	1	0	0	1	0	2
	Exp	0.48625	0.699901	0.0317739	0.224827	0.516709	0.0405391
32.07.07.05 peroxidase reaction	Obs	0	0	0	0	1	0	1
	Exp	0.243125	0.349951	0.0158869	0.112414	0.258354	0.0202695
32.07.07.07 superoxide metabolism	Obs	0	0	0	0	3	0	3
	Exp	0.729374	1.04985	0.0476608	0.337241	0.775063	0.0608086
32.07.09 detoxification by degradation	Obs	0	1	0	1	0	1	3
	Exp	0.729374	1.04985	0.0476608	0.337241	0.775063	0.0608086
32.10 degradation / modification of foreign (exogenous) compounds	Obs	1	3	0	1	4	1	10
	Exp	2.43125	3.49951	0.158869	1.12414	2.58354	0.202695
32.10.05 degradation / modification of foreign (exogenous) proteins	Obs	1	0	0	0	0	0	1
	Exp	0.243125	0.349951	0.0158869	0.112414	0.258354	0.0202695
32.10.07 degradation / modification of foreign (exogenous) polysaccharides	Obs	0	3	0	1	4	1	9
	Exp	2.18812	3.14956	0.142982	1.01172	2.32519	0.182426
34 INTERACTION WITH THE ENVIRONMENT	Obs	28^^^	81	7	55^^^	87^	4	262
	Exp	63.6987	91.6871	4.16238	29.4524	67.6888	5.31062
34.01 homeostasis	Obs	2^^^	22^^^	5	33^^^	55^^^	2	119
	Exp	28.9319	41.6441	1.89054	13.3772	30.7442	2.41207
34.01.01 homeostasis of cations	Obs	2^^^	20^^	5	28^^^	47^^^	2	104
	Exp	25.285	36.3949	1.65224	11.691	26.8689	2.10803
34.01.01.01 homeostasis of metal ions (Na, K, Ca etc.)	Obs	0^^^	18	5^	23^^^	27	2	75
	Exp	18.2344	26.2463	1.19152	8.43103	19.3766	1.52021
34.01.01.03 homeostasis of protons	Obs	0^^	0^^^	0	9^^	17^^^	1	27
	Exp	6.56437	9.44867	0.428947	3.03517	6.97557	0.547277
34.01.03 homeostasis of anions	Obs	0	2	0	4	8^	0	14
	Exp	3.40375	4.89931	0.222417	1.57379	3.61696	0.283773
34.01.03.01 homeostasis of sulfate	Obs	0	0	0	3	1	0	4
	Exp	0.972499	1.3998	0.0635477	0.449655	1.03342	0.0810781
34.01.03.03 homeostasis of phosphate	Obs	0	0	0	0	4	0	4
	Exp	0.972499	1.3998	0.0635477	0.449655	1.03342	0.0810781
34.01.03.05 homeostasis of chloride	Obs	0	2	0	1	3	0	6
	Exp	1.45875	2.0997	0.0953216	0.674482	1.55013	0.121617
34.05 cell motility	Obs	0	1	0	0	0	0	1
	Exp	0.243125	0.349951	0.0158869	0.112414	0.258354	0.0202695
34.05.01 cell migration	Obs	0	1	0	0	0	0	1
	Exp	0.243125	0.349951	0.0158869	0.112414	0.258354	0.0202695
34.07 cell adhesion	Obs	0	0	0	0	0	1	1
	Exp	0.243125	0.349951	0.0158869	0.112414	0.258354	0.0202695
34.07.01 cell-cell adhesion	Obs	0	0	0	0	0	1	1
	Exp	0.243125	0.349951	0.0158869	0.112414	0.258354	0.0202695
34.11.09 temperature perception and response	Obs	0	0	1	0	0	0	1
	Exp	0.243125	0.349951	0.0158869	0.112414	0.258354	0.0202695
34.11 cellular sensing and response to external stimulus	Obs	26	59	2	22	33	1	143
	Exp	34.7668	50.0429	2.27183	16.0752	36.9447	2.89854
34.11.01 photoperception and response	Obs	0	0	0	3	1	0	4
	Exp	0.972499	1.3998	0.0635477	0.449655	1.03342	0.0810781
34.11.03 chemoperception and response	Obs	25	51	1	13	25	1	116
	Exp	28.2025	40.5943	1.84288	13.04	29.9691	2.35127
34.11.03.03 chemotaxis	Obs	0	1	0	0	0	0	1
	Exp	0.243125	0.349951	0.0158869	0.112414	0.258354	0.0202695
34.11.03.07 pheromone response, mating-type determination, sex-specific proteins	Obs	26	45	1	9	19	1	101
	Exp	24.5556	35.345	1.60458	11.3538	26.0938	2.04722
34.11.03.11 pH response	Obs	0	5	0	1	0	0	6
	Exp	1.45875	2.0997	0.0953216	0.674482	1.55013	0.121617
34.11.03.13 osmosensing and response	Obs	0	1	0	3	6	0	10
	Exp	2.43125	3.49951	0.158869	1.12414	2.58354	0.202695
34.11.11 rhythm (e.g. circadian, ultradian)	Obs	0	2	0	2	5	0	9
	Exp	2.18812	3.14956	0.142982	1.01172	2.32519	0.182426
34.11.12 perception of nutrients and nutritional adaptation	Obs	0	2	0	4	1	0	7
	Exp	1.70187	2.44965	0.111209	0.786896	1.80848	0.141887
38 TRANSPOSABLE ELEMENTS, VIRAL AND PLASMID PROTEINS	Obs	1	6	0	2	1	0	10
	Exp	2.43125	3.49951	0.158869	1.12414	2.58354	0.202695
38.07 proteins necessary for transposon movement	Obs	0	5	0	2	1	0	8
	Exp	1.945	2.79961	0.127095	0.89931	2.06683	0.162156
40 CELL FATE	Obs	1^^^	27	5^	11	27	0	71
	Exp	17.2619	24.8465	1.12797	7.98137	18.3432	1.43914
40.01 cell growth / morphogenesis	Obs	1^^^	24	4^	10	19	0	58
	Exp	14.1012	20.2971	0.921442	6.52	14.9846	1.17563
40.01.03 directional cell growth (morphogenesis)	Obs	1	1	2^	2	5	0	11
	Exp	2.67437	3.84946	0.174756	1.23655	2.8419	0.222965
40.01.03.01 regulation of directional cell growth	Obs	0	0	0	0	1	0	1
	Exp	0.243125	0.349951	0.0158869	0.112414	0.258354	0.0202695
40.01.05 growth regulators / regulation of cell size	Obs	0	3	0	0	1	0	4
	Exp	0.972499	1.3998	0.0635477	0.449655	1.03342	0.0810781
40.02 cell differentiation	Obs	0	0	0	1	1	0	2
	Exp	0.48625	0.699901	0.0317739	0.224827	0.516709	0.0405391
40.02.03 activity of intercellular mediators	Obs	0	0	0	1	1	0	2
	Exp	0.48625	0.699901	0.0317739	0.224827	0.516709	0.0405391
40.02.03.05 growth factors	Obs	0	0	0	1	0	0	1
	Exp	0.243125	0.349951	0.0158869	0.112414	0.258354	0.0202695
40.10 cell death	Obs	0	2	0	0	5	0	7
	Exp	1.70187	2.44965	0.111209	0.786896	1.80848	0.141887
40.10.02 apoptosis (type I programmed cell death)	Obs	0	1	0	0	4	0	5
	Exp	1.21562	1.74975	0.0794346	0.562069	1.29177	0.101348
40.10.02.01 anti-apoptosis	Obs	0	1	0	0	0	0	1
	Exp	0.243125	0.349951	0.0158869	0.112414	0.258354	0.0202695
40.10.02.02 apoptotic program	Obs	0	0	0	0	1	0	1
	Exp	0.243125	0.349951	0.0158869	0.112414	0.258354	0.0202695
40.10.02.03 induction of apoptosis	Obs	0	0	0	0	1	0	1
	Exp	0.243125	0.349951	0.0158869	0.112414	0.258354	0.0202695
40.10.02.03.02 induction of apoptosis by intracellular signals	Obs	0	0	0	0	1	0	1
	Exp	0.243125	0.349951	0.0158869	0.112414	0.258354	0.0202695
40.20 cell aging	Obs	0	1	1	1	2	0	5
	Exp	1.21562	1.74975	0.0794346	0.562069	1.29177	0.101348
41 DEVELOPMENT (Systemic)	Obs	3	11	0	3	4	0	21
	Exp	5.10562	7.34896	0.333625	2.36069	5.42544	0.42566
41.01 fungal/microorganismic development	Obs	3	11	0	3	4	0	21
	Exp	5.10562	7.34896	0.333625	2.36069	5.42544	0.42566
41.01.01 mating (fertilization)	Obs	1	0	0	0	0	0	1
	Exp	0.243125	0.349951	0.0158869	0.112414	0.258354	0.0202695
41.01.03 tissue pattern formation	Obs	1	4	0	0	1	0	6
	Exp	1.45875	2.0997	0.0953216	0.674482	1.55013	0.121617
41.01.03.01 fruit body development (sexually or asexually derived spores)	Obs	1	3	0	0	0	0	4
	Exp	0.972499	1.3998	0.0635477	0.449655	1.03342	0.0810781
41.01.03.03 mycelium development (hyphae, vegetative thallus)	Obs	0	1	0	0	0	0	1
	Exp	0.243125	0.349951	0.0158869	0.112414	0.258354	0.0202695
42 BIOGENESIS OF CELLULAR COMPONENTS	Obs	4^^^	48	8^	39^^^	80^^^	3	182
	Exp	44.2487	63.691	2.89142	20.4593	47.0205	3.68905
42.01 cell wall	Obs	2^^^	14	5^	18^^	26	1	66
	Exp	16.0462	23.0967	1.04854	7.41931	17.0514	1.33779
42.02 eukaryotic plasma membrane	Obs	0	0	0	3	0	0	3
	Exp	0.729374	1.04985	0.0476608	0.337241	0.775063	0.0608086
42.04 cytoskeleton/structural proteins	Obs	2^	9	1	5	21^^	1	39
	Exp	9.48187	13.6481	0.61959	4.38413	10.0758	0.790512
42.04.03 actin cytoskeleton	Obs	1	6	1	2	11^	0	21
	Exp	5.10562	7.34896	0.333625	2.36069	5.42544	0.42566
42.04.05 microtubule cytoskeleton	Obs	0	2	0	0	6^	0	8
	Exp	1.945	2.79961	0.127095	0.89931	2.06683	0.162156
42.05 centrosome	Obs	0	1	0	0	0	0	1
	Exp	0.243125	0.349951	0.0158869	0.112414	0.258354	0.0202695
42.08 Golgi	Obs	0	1	1	1	2	0	5
	Exp	1.21562	1.74975	0.0794346	0.562069	1.29177	0.101348
42.09 intracellular transport vesicles	Obs	0	0	0	0	6	0	6
	Exp	1.45875	2.0997	0.0953216	0.674482	1.55013	0.121617
42.10 nucleus	Obs	0^	12	0	2	10	0	24
	Exp	5.835	8.39882	0.381286	2.69793	6.2005	0.486469
42.10.03 organization of chromosome structure	Obs	0	7	0	2	8	0	17
	Exp	4.13312	5.94916	0.270078	1.91103	4.39202	0.344582
42.10.05 nuclear membrane	Obs	0	4	0	0	0	0	4
	Exp	0.972499	1.3998	0.0635477	0.449655	1.03342	0.0810781
42.16 mitochondrion	Obs	0	2	1	3	7	0	13
	Exp	3.16062	4.54936	0.20653	1.46138	3.35861	0.263504
42.19 peroxisome	Obs	0	3	0	3	3	1	10
	Exp	2.43125	3.49951	0.158869	1.12414	2.58354	0.202695
42.25 vacuole or lysosome	Obs	0	2	0	2	4	0	8
	Exp	1.945	2.79961	0.127095	0.89931	2.06683	0.162156
42.27 extracellular / secretion proteins	Obs	0	5	0	3	1	0	9
	Exp	2.18812	3.14956	0.142982	1.01172	2.32519	0.182426
43 CELL TYPE DIFFERENTIATION	Obs	13^^^	54	6	24	38	3	138
	Exp	33.5512	48.2932	2.1924	15.5131	35.6529	2.7972
43.01 fungal/microorganismic cell type differentiation	Obs	13^^^	54	6	24	38	3	138
	Exp	33.5512	48.2932	2.1924	15.5131	35.6529	2.7972
43.01.03 fungal and other eukaryotic cell type differentiation	Obs	13^^^	54	6	24	38	2	137
	Exp	33.3081	47.9432	2.17651	15.4007	35.3945	2.77693
43.01.03.05 budding, cell polarity and filament formation	Obs	0^^^	18	6^^	9	23^	0	56
	Exp	13.615	19.5972	0.889668	6.29517	14.4678	1.13509
43.01.03.06 hyphae formation	Obs	0	3	0	1	3	0	7
	Exp	1.70187	2.44965	0.111209	0.786896	1.80848	0.141887
43.01.03.07 development of conidia	Obs	1	1	0	2	1	1	6
	Exp	1.45875	2.0997	0.0953216	0.674482	1.55013	0.121617
43.01.03.09 development of asco- basidio- or zygospore	Obs	3	9	0	7	6	2	27
	Exp	6.56437	9.44867	0.428947	3.03517	6.97557	0.547277
47 ORGAN DIFFERENTIATION	Obs	0	0	1	0	0	0	1
	Exp	0.243125	0.349951	0.0158869	0.112414	0.258354	0.0202695
47.01 fungal organ	Obs	0	0	1	0	0	0	1
	Exp	0.243125	0.349951	0.0158869	0.112414	0.258354	0.0202695
47.01.01 hyphe	Obs	0	0	1	0	0	0	1
	Exp	0.243125	0.349951	0.0158869	0.112414	0.258354	0.0202695
70 SUBCELLULAR LOCALIZATION	Obs	16^^^	249^^^	30^	180^^^	655^^^	14	1144
	Exp	278.135	400.344	18.1746	128.601	295.557	23.1883
70.01 cell wall	Obs	3	7	1	2	4	2	19
	Exp	4.61937	6.64906	0.301852	2.13586	4.90873	0.385121
70.02 eukaryotic plasma membrane / membrane attached	Obs	3^^^	36	1	46^^^	33	0	119
	Exp	28.9319	41.6441	1.89054	13.3772	30.7442	2.41207
70.03 cytoplasm	Obs	0^^^	13^^^	4	11^	162^^^	0	190
	Exp	46.1937	66.4906	3.01852	21.3586	49.0873	3.85121
70.04 cytoskeleton	Obs	1^^	5^^	1	9	25^^^	0	41
	Exp	9.96812	14.348	0.651364	4.60896	10.5925	0.831051
70.04.03 actin cytoskeleton	Obs	0	0	0	2	4	0	6
	Exp	1.45875	2.0997	0.0953216	0.674482	1.55013	0.121617
70.04.05 microtubule cytoskeleton	Obs	0	1	0	0	6	0	7
	Exp	1.70187	2.44965	0.111209	0.786896	1.80848	0.141887
70.05 centrosome	Obs	0	1	0	1	1	0	3
	Exp	0.729374	1.04985	0.0476608	0.337241	0.775063	0.0608086
70.07 endoplasmic reticulum	Obs	0^^^	10	1	7	22^^^	0	40
	Exp	9.72499	13.998	0.635477	4.49655	10.3342	0.810781
70.08 Golgi	Obs	0^^^	4^	1	12^^	17^	0	34
	Exp	8.26624	11.8983	0.540156	3.82207	8.78405	0.689164
70.09 intracellular transport vesicles	Obs	0	0^	0	1	12^^^	0	13
	Exp	3.16062	4.54936	0.20653	1.46138	3.35861	0.263504
70.10 nucleus	Obs	6^^^	115	15^^^	32	152^^^	2	322
	Exp	78.2862	112.684	5.11559	36.1972	83.1901	6.52679
70.10.03 chromosome	Obs	0^	9	0	1	11^	0	21
	Exp	5.10562	7.34896	0.333625	2.36069	5.42544	0.42566
70.10.04 centromere / kinetochore	Obs	0	0	0	0	1	0	1
	Exp	0.243125	0.349951	0.0158869	0.112414	0.258354	0.0202695
70.10.05 nuclear membrane	Obs	0	4	1	0	1	0	6
	Exp	1.45875	2.0997	0.0953216	0.674482	1.55013	0.121617
70.10.07 nucleolus	Obs	0	0	2	0	2	0	4
	Exp	0.972499	1.3998	0.0635477	0.449655	1.03342	0.0810781
70.10.09 nuclear speckles	Obs	0	0	0	0	1	0	1
	Exp	0.243125	0.349951	0.0158869	0.112414	0.258354	0.0202695
70.16 mitochondrion	Obs	1^^^	53^^^	7	41	196^^^	5	303
	Exp	73.6668	106.035	4.81374	34.0614	78.2814	6.14167
70.16.03 mitochondrial intermembrane space	Obs	0	0	0	1	0	0	1
	Exp	0.243125	0.349951	0.0158869	0.112414	0.258354	0.0202695
70.16.05 mitochondrial inner membrane	Obs	0	0	0	0	1	0	1
	Exp	0.243125	0.349951	0.0158869	0.112414	0.258354	0.0202695
70.19 peroxisome	Obs	0^^	4	0	5	16^^^	1	26
	Exp	6.32124	9.09872	0.41306	2.92276	6.71721	0.527008
70.22 endosome	Obs	0	0	0	0	4	0	4
	Exp	0.972499	1.3998	0.0635477	0.449655	1.03342	0.0810781
70.25 vacuole or lysosome	Obs	0^^^	3^^	0	8	25^^^	2	38
	Exp	9.23874	13.2981	0.603703	4.27172	9.81746	0.770242
70.27 extracellular / secretion proteins	Obs	2	1	1	5	4	2	15
	Exp	3.64687	5.24926	0.238304	1.68621	3.87531	0.304043
98 CLASSIFICATION NOT YET CLEAR-CUT	Obs	20^^^	80	10^^	34	59	2	205
	Exp	49.8406	71.7399	3.25682	23.0448	52.9626	4.15525
99 UNCLASSIFIED PROTEINS	Obs	2083^^^	2110^^^	46^^^	378^^^	390^^^	86^	5093
	Exp	1238.23	1782.3	80.9121	572.523	1315.8	103.233
Total c		2219	3194	145	1026	2358	185	9127
a Observed number of genes and expected number of genes if probabilities of each outcome are independent of the LS group.
b Number of genes in each of the functional categories.
c Number of genes in each of the LS groups.
^ p<0.05, ^^ p<0.01, ^^^ p<0.001. p-values due to Fisher's exact test with Benjamini & Hochberg multiple testing correction.
